# Supplementary material
Source: PubMed Central journal article supplement (PMC7115582)

# SUPPLEMENTARY DATA

## Structure-activity relationship studies of lipophilic teicoplanin pseudoaglycon derivatives as new anti-influenza virus agents

*Zsolt Szűcs, Viktor Kelemen, Son Le Thai, Magdolna Csávás, Erzsébet Róth, Gyula Batta,  
Annelies Stevaert, Evelien Vanderlinden, Lieve Naesens, \*Pál Herczegh\* and Anikó Borbás\**

### Table of Contents

|                                                                                   |     |
|-----------------------------------------------------------------------------------|-----|
| NMR Data for glycopeptide derivatives ( <b>Tables S1-S5, Figures S1-S9</b> )..... | S2  |
| Table of anti-coronavirus activity ( <b>Table S6</b> ).....                       | S20 |
| Elementary analysis data for glycopeptide derivatives ( <b>Table S7</b> ) .....   | S21 |
| NMR spectra of compounds.....                                                     | S22 |

**Table S1.**  $^1\text{H}$  and  $^{13}\text{C}$  NMR data for teicoplanin pseudoaglycon bis-alkylthio maleimide derivatives **13**, **14** and **17** (Series 1)

| assignment             | chemical shifts in ppm |              |                 |              |                 |              |
|------------------------|------------------------|--------------|-----------------|--------------|-----------------|--------------|
|                        | <b>13</b>              |              | <b>14</b>       |              | <b>17</b>       |              |
|                        | $^{13}\text{C}$        | $^1\text{H}$ | $^{13}\text{C}$ | $^1\text{H}$ | $^{13}\text{C}$ | $^1\text{H}$ |
| x1                     | 56.9                   | 6.11         | 56.9            | 6.11         | 56.9            | 6.10         |
| x2                     | 55.5                   | 5.00         | 55.5            | 5.00         | 55.5            | 4.98         |
| x3                     | 57.8                   | 5.31         | 57.8            | 5.32         | 57.8            | 5.32         |
| x4                     | 54.5                   | 5.65         | 54.5            | 5.66         | 54.5            | 5.66         |
| x5                     | 53.4                   | 4.34         | 53.4            | 4.34         | 53.4            | 4.34         |
| x6                     | 60.8                   | 4.12         | 60.8            | 4.13         | 60.8            | 4.10         |
| x7                     | 59.1                   | 4.30         | 59.1            | 4.32         | 59.0            | 4.30         |
| 1e                     | 118.2                  | 6.92         | 118.1           | 6.94         | 118.2           | 6.92         |
| 2e                     | 124.8                  | 7.23         | 124.8           | 7.23         | 124.8           | 7.22         |
| 3b                     | 109.7                  | 6.34         | 109.7           | 6.34         | 109.7           | 6.33         |
| 3f                     | 102.2                  | 6.50         | 102.1           | 6.49         | 102.1           | 6.50         |
| 4b                     | 107.8                  | 5.59         | 107.8           | 5.59         | 107.8           | 5.58         |
| 5f                     | 125.1                  | 6.65         | 125.2           | 6.65         | 125.2           | 6.64         |
| 6b                     | 128.3                  | 7.86         | 128.3           | 7.86         | 128.4           | 7.86         |
| 7f                     | 107.7                  | 6.50         | 107.7           | 6.49         | 107.8           | 6.49         |
| z6                     | 75.4                   | 5.43         | 75.7            | 5.40         | 75.0            | 5.46         |
| z2 (z'2)               | 36.8                   | 2.78/3.26    | 36.8            | 2.77/3.25    | 36.9            | 2.77/3.24    |
| GlcNAc 1               | 98.6                   | 4.39         | 98.9            | 4.38         | 98.3            | 4.40         |
| GlcNAc CH <sub>3</sub> | 22.8                   | 1.84         | 22.9            | 1.84         | 22.8            | 1.83         |
| MI 2,5                 | 165.2                  | -            | 165.9           | -            | 165.9           | -            |
| MI 3,4                 | 135.3                  | -            | n.d.            | -            | n.d.            | -            |
| Propyl 1               | -                      | -            | -               | -            | 32.7            | 3.25/3.15    |
| Propyl 2               | -                      | -            | -               | -            | 23.2            | 1.56         |
| Propyl 3               | -                      | -            | -               | -            | 12.5            | 0.92         |
| Butyl 1, 1'            | 30.4                   | 3.19/3.25    | -               | -            | -               | -            |
| Butyl 2, 2'            | 31.7                   | 1.53         | -               | -            | -               | -            |
| Butyl 3, 3'            | 20.6                   | 1.34         | -               | -            | -               | -            |
| Butyl 4, 4'            | 13.1                   | 0.86         | -               | -            | -               | -            |
| Hexyl 1, 1'            | -                      | -            | 30.7            | 3.19/3.23    | -               | -            |
| Hexyl 2, 2'            | -                      | -            | 29.7            | 1.53         | -               | -            |
| Hexyl 3, 3'            | -                      | -            | 27.1            | 1.32         | -               | -            |
| Hexyl 4, 4'            | -                      | -            | 30.4            | 1.22         | -               | -            |
| Hexyl 5, 5'            | -                      | -            | 21.7            | 1.23         | -               | -            |
| Hexyl 6, 6'            | -                      | -            | 13.6            | 0.84         | -               | -            |
| Dodecyl 1              | -                      | -            | -               | -            | 30.8            | 3.23/3.17    |
| Dodecyl 2              | -                      | -            | -               | -            | 29.7            | 1.55         |
| Dodecyl 3              | -                      | -            | -               | -            | 27.4            | 1.32         |
| Dodecyl 4-9            | -                      | -            | -               | -            | 29.1-28.1       | 1.25-1.20    |
| Dodecyl 10             | -                      | -            | -               | -            | 31.1            | 1.22         |
| Dodecyl 11             | -                      | -            | -               | -            | 21.9            | 1.25         |
| Dodecyl 12             | -                      | -            | -               | -            | 13.7            | 0.85         |

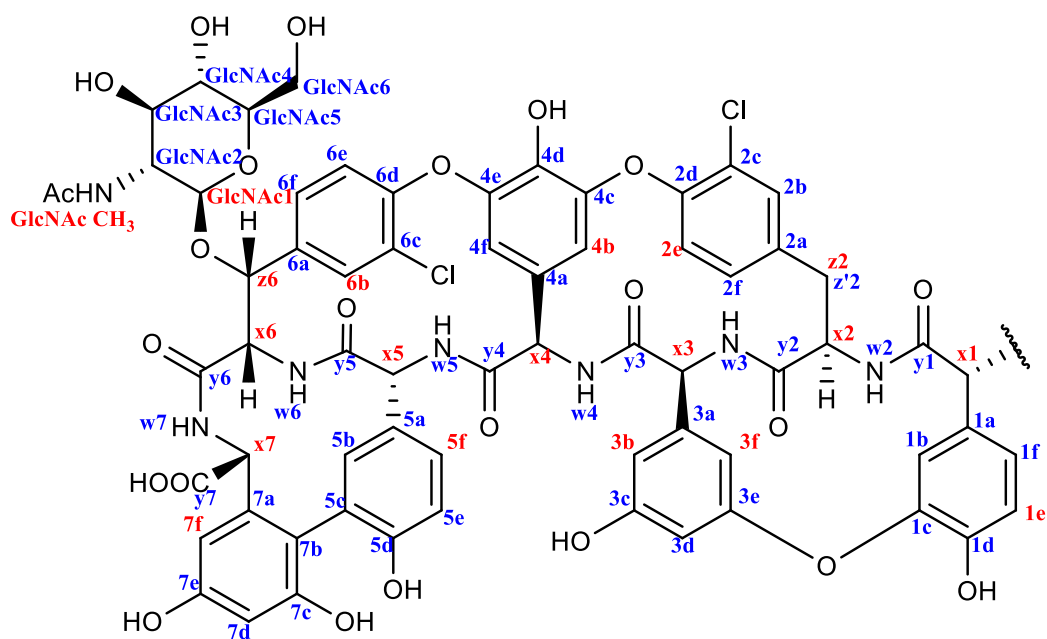

**Figure S1.** Atom numberings of teicoplanin pseudoaglycon for NMR assignment (used for all derivatives)

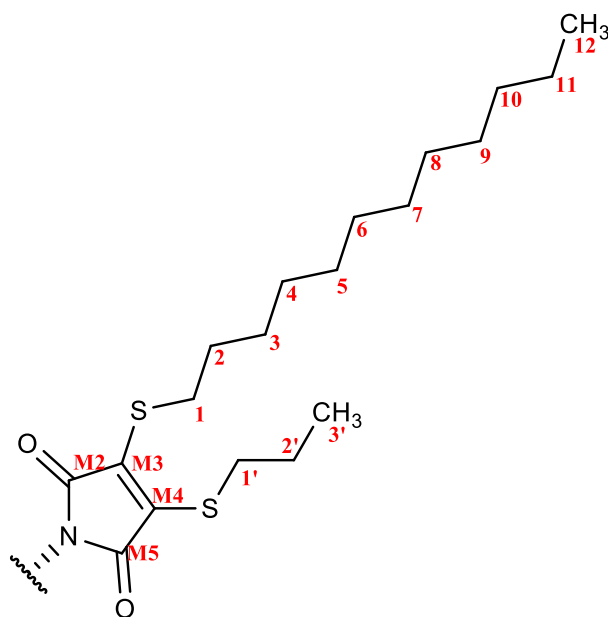

**Figure S2.** Atom numberings of Series 1 side chains for NMR assignment

**Table S2.**  $^1\text{H}$  and  $^{13}\text{C}$  NMR data for the triazole linked bis-alkylthio maleimide derivative **28** of teicoplanin pseudoaglycon (Series 2)

| chemical shifts in ppm |              |                 |
|------------------------|--------------|-----------------|
| <b>28</b>              |              |                 |
| assignment             | $^1\text{H}$ | $^{13}\text{C}$ |
| x1                     | 64.1         | 7.06            |
| x2                     | 55.5         | 4.87            |
| x3                     | 58.4         | 5.39            |
| x4                     | 54.7         | 5.62            |
| x5                     | 53.6         | 4.36            |
| x6                     | 60.9         | 4.14            |
| x7                     | 59.3         | 4.32            |
| 1b                     | 119.6        | 7.01            |
| 1e                     | 119.1        | 6.94            |
| 1f                     | 125.7        | 6.83            |
| 2b                     | 131.0        | 7.19            |
| 2e                     | 125.2        | 7.15            |
| 2f                     | 129.3        | 7.62            |
| 3b                     | 110.1        | 6.33            |
| 3d                     | 105.0        | 6.36            |
| 3f                     | 104.0        | 6.54            |
| 4b                     | 108.1        | 5.52            |
| 4f                     | 104.6        | 5.08            |
| 5e                     | 116.6        | 6.65            |
| 5f                     | 125.5        | 6.63            |
| 6b                     | 128.5        | 7.85            |
| 6e                     | 123.4        | 7.26            |
| 6f                     | 128.2        | 7.25            |
| 7d                     | 101.7        | 6.30            |
| 7f                     | 107.9        | 6.50            |
| z6                     | 76.1         | 5.40            |
| z2/z'2                 | 36.4         | 2.83/3.27       |
| GlcNAc1                | 99.1         | 4.37            |
| GlcNAc2                | 55.8         | 3.51            |
| GlcNAc3                | 73.4         | 3.39            |
| GlcNAc4                | 70.0         | 3.22            |
| GlcNAc5                | 76.9         | 3.08            |
| GlcNAc6                | 60.3         | 3.60            |
| GlcNAc CH <sub>3</sub> | 23.0         | 1.84            |
| Triazole 4             | 141.9        | -               |
| Triazole 5             | 123.0        | 7.69            |
| M 2,5                  | 165.7        | -               |
| M 3,4                  | 135.8        | -               |
| M CH <sub>2</sub>      | 33.5         | 4.59            |
| Hexyl 1, 1'            | 31.1         | 3.22            |
| Hexyl 2, 2'            | 29.9         | 1.54            |
| Hexyl 3, 3'            | 27.4         | 1.32            |
| Hexyl 4, 4'            | 30.6         | 1.23            |
| Hexyl 5, 5'            | 21.9         | 1.23            |
| Hexyl 6, 6'            | 13.8         | 0.83            |



**Table S2.** (continued)  $^1\text{H}$  and  $^{13}\text{C}$  NMR data\* for the triazole linked bis-alkylthio maleimide derivatives **26**, **27** of teicoplanin pseudoaglycon (Series 2)

| assignment             | chemical shifts in ppm |              |                 |              |
|------------------------|------------------------|--------------|-----------------|--------------|
|                        | <b>26</b>              |              | <b>27</b>       |              |
|                        | $^{13}\text{C}$        | $^1\text{H}$ | $^{13}\text{C}$ | $^1\text{H}$ |
| x1                     | 64.4                   | 7.01         | 64.4            | 7.04         |
| x2                     | 55.3                   | 4.93         | 55.5            | 4.88         |
| x3                     | 58.6                   | 5.35         | 58.5            | 5.37         |
| x4                     | 54.6                   | 5.59         | 54.8            | 5.61         |
| x5                     | 53.5                   | 4.35         | 53.7            | 4.34         |
| x6                     | 60.9                   | 4.11         | 61.1            | 4.13         |
| x7                     | 59.4                   | 4.28         | 59.5            | 4.30         |
| 1e                     | 118.9                  | 6.87         | 119.2           | 6.92         |
| 2e                     | 124.5                  | 7.04         | 125.0           | 7.11         |
| 3b                     | 109.8                  | 6.30         | 110.2           | 6.32         |
| 3f                     | 103.8                  | 6.57         | 104.1           | 6.53         |
| 4b                     | 107.9                  | 5.53         | 108.1           | 5.52         |
| 5f                     | 125.3                  | 6.61         | 125.6           | 6.64         |
| 6b                     | 128.5                  | 7.85         | 128.7           | 7.84         |
| 7f                     | 108.0                  | 6.49         | 108.1           | 6.48         |
| z6                     | 75.4                   | 5.44         | 76.3            | 5.38         |
| z2/z'2                 | 2.81/3.23              | 36.9         | 36.6            | 2.86/3.28    |
| GlcNAc1                | 98.7                   | 4.37         | 99.5            | 4.35         |
| GlcNAc CH <sub>3</sub> | 23.0                   | 1.83         | 23.1            | 1.85         |
| Triazole 4             | 141.8                  | -            | 142.0           | -            |
| Triazole 5             | 123.3                  | 7.67         | 123.1           | 7.66         |
| M 2,5                  | 165.6                  | -            | 165.8           | -            |
| M 3,4                  | 135.6                  | -            | 135.8           | -            |
| M CH <sub>2</sub>      | 33.5                   | 4.60         | 33.6            | 4.59         |
| Propyl 1, 1'           | 33.0                   | 3.20         | -               | -            |
| Propyl 2, 2'           | 23.4                   | 1.56         | -               | -            |
| Propyl 3, 3'           | 12.8                   | 0.91         | -               | -            |
| Butyl 1, 1'            | -                      | -            | 30.9            | 3.22         |
| Butyl 2, 2'            | -                      | -            | 32.2            | 1.50         |
| Butyl 3, 3'            | -                      | -            | 21.1            | 1.31         |
| Butyl 4, 4'            | -                      | -            | 13.4            | 0.83         |

\*only signals that are crucial for identification are listed

**Table S2.** (continued)  $^1\text{H}$  and  $^{13}\text{C}$  NMR data\* for the triazole linked bis-alkylthio maleimide derivatives **29-31** of teicoplanin pseudoaglycon (Series 2)

|                                 | <b>29</b>       |              | <b>30</b>       |              | <b>31</b>       |              |
|---------------------------------|-----------------|--------------|-----------------|--------------|-----------------|--------------|
| assignment                      | $^{13}\text{C}$ | $^1\text{H}$ | $^{13}\text{C}$ | $^1\text{H}$ | $^{13}\text{C}$ | $^1\text{H}$ |
| x1                              | 64.6            | 7.05         | 64.7            | 7.01         | 64.0            | 7.07         |
| x2                              | 55.6            | 4.90         | 55.4            | 4.95         | 55.3            | 4.85         |
| x3                              | 58.7            | 5.37         | 58.9            | 5.34         | 58.4            | 5.39         |
| x4                              | 54.9            | 5.62         | 54.7            | 5.57         | 54.8            | 5.63         |
| x5                              | 53.9            | 4.35         | 53.6            | 4.36         | 53.7            | 4.34         |
| x6                              | 61.2            | 4.15         | 61.0            | 4.15         | 61.0            | 4.13         |
| x7                              | 59.6            | 4.31         | 59.6            | 4.26         | 59.2            | 4.31         |
| 1e                              | 119.2           | 6.92         | 118.9           | 6.85         | 119.0           | 6.95         |
| 2e                              | 125.0           | 7.11         | 124.6           | 6.99         | 125.3           | 7.14         |
| 3b                              | 110.1           | 6.33         | 110.0           | 6.30         | 110.0           | 6.33         |
| 3f                              | 104.0           | 6.56         | 103.8           | 6.56         | 103.9           | 6.53         |
| 4b                              | 108.1           | 5.54         | 108.0           | 5.53         | 108.0           | 5.53         |
| 5f                              | 125.6           | 6.65         | 125.5           | 6.62         | 125.4           | 6.63         |
| 6b                              | 128.7           | 7.86         | 128.7           | 7.80         | 128.5           | 7.86         |
| 7f                              | 108.1           | 6.49         | 108.1           | 6.47         | 107.9           | 6.50         |
| z6                              | 76.1            | 5.40         | 76.4            | 5.37         | 75.7            | 5.42         |
| z2/z'2                          | 36.7            | 3.27/2.85    | 37.3            | 2.78/3.21    | 36.1            | 2.88/3.29    |
| GlcNAc1                         | 99.3            | 4.38         | 99.7            | 4.34         | 98.9            | 4.38         |
| GlcNAc CH <sub>3</sub>          | 23.1            | 1.84         | 23.2            | 1.84         | 22.9            | 1.83         |
| <hr/>                           |                 |              |                 |              |                 |              |
| T4                              | 141.8           | -            | 142.1           | -            | 141.9           | -            |
| T5                              | 123.2           | 7.70         | 123.3           | 7.64         | 122.9           | 7.65         |
| <hr/>                           |                 |              |                 |              |                 |              |
| M 2,5                           | 165.7           | -            | 165.8           | -            | 165.5           | -            |
| M 3,4                           | 135.8           | -            | 135.9           | -            | 135.6           | -            |
| M CH <sub>2</sub>               | 33.5            | 4.59         | 33.6            | 4.58         | 33.3            | 4.58         |
| <hr/>                           |                 |              |                 |              |                 |              |
| Alkyl $\alpha/\alpha'$          | 31.1            | 3.22         | 31.3            | 3.21         | -               | -            |
| Alkyl $\beta/\beta'$            | 30.0            | 1.55         | 30.1            | 1.53         | -               | -            |
| Alkyl $\gamma/\gamma'$          | 27.8            | 1.33         | 27.8            | 1.31         | -               | -            |
| Alkyl bulk**                    | 28.5            | 1.22         | 29.1            | 1.21         | -               | -            |
| Alkyl $\omega$ -2/ $\omega$ -2' | 31.3            | 1.21         | 31.4            | 1.21         | -               | -            |
| Alkyl $\omega$ -1/ $\omega$ -1' | 22.1            | 1.23         | 22.2            | 1.23         | -               | -            |
| Alkyl $\omega/\omega'$          | 14.0            | 0.84         | 14.0            | 0.83         | -               | -            |
| <hr/>                           |                 |              |                 |              |                 |              |
| $\alpha$ -G1                    | -               | -            | -               | -            | 95.8            | 5.38         |
| $\alpha$ -G2                    | -               | -            | -               | -            | 69.7            | 4.31         |
| $\alpha$ -G3                    | -               | -            | -               | -            | 70.2            | 4.59         |
| $\alpha$ -G4                    | -               | -            | -               | -            | 71.0            | 4.20         |
| $\alpha$ -G5                    | -               | -            | -               | -            | 67.3            | 3.80         |
| $\alpha$ -G6                    | -               | -            | -               | -            | 31.3            | 3.44 / 3.26  |
| $\alpha$ -G-C <sub>q</sub>      | -               | -            | -               | -            | 108.0/108.6     | -            |
| $\alpha$ -G-CH <sub>3</sub>     | -               | -            | -               | -            | 25.6            | 1.28         |
|                                 | -               | -            | -               | -            | 24.4            | 1.23         |

\*only signals that are crucial for identification are listed

\*\*  $\delta$  to  $\omega$ -3 methylene groups of alkyl substituents

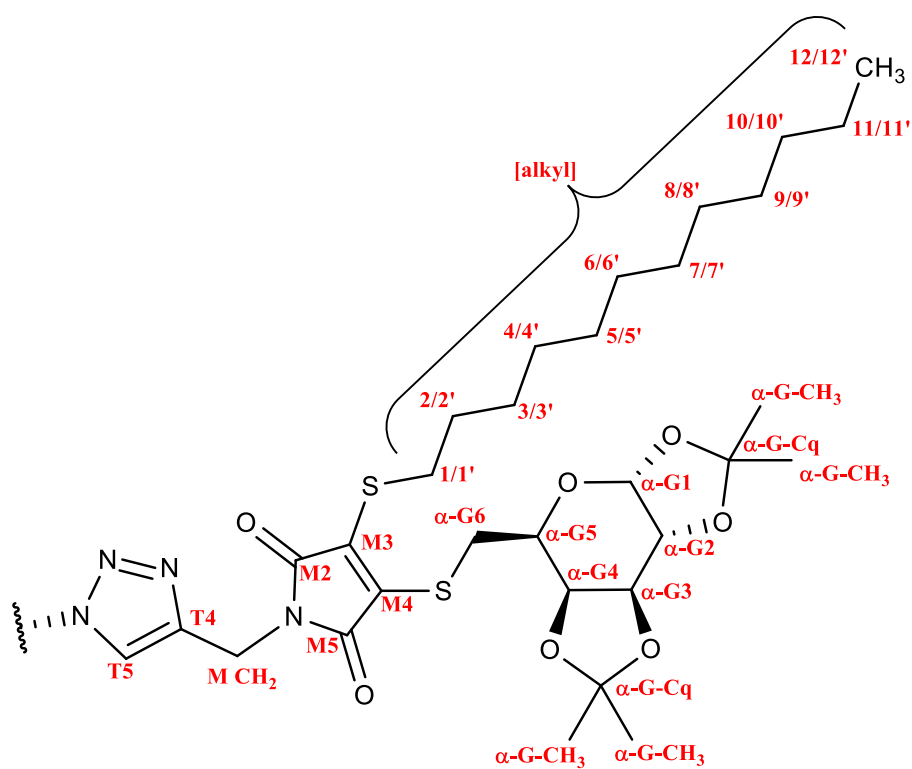

**Figure S3.** Atom numberings of Series 2 side chains for NMR assignment  
(This structure is only an illustration)

**Table S3.** <sup>1</sup>H and <sup>13</sup>C NMR data for the triazole-tetraethylene glycol linked bis-alkylthio maleimide derivative **42** of teicoplanin pseudoaglycon (Series 3)

| <b>42</b>  |                |                 |                        |                |                 |
|------------|----------------|-----------------|------------------------|----------------|-----------------|
| assignment | <sup>1</sup> H | <sup>13</sup> C | assignment             | <sup>1</sup> H | <sup>13</sup> C |
| x1         | 7.07           | 64.3            | GlcNAc1                | 4.39           | 98.8            |
| x2         | 4.91           | 55.4            | GlcNAc2                | 3.52           | 55.9            |
| x3         | 5.36           | 58.5            | GlcNAc3                | 3.37           | 73.5            |
| x4         | 5.61           | 54.7            | GlcNAc4                | 3.20           | 69.9            |
| x5         | 4.35           | 53.6            | GlcNAc5                | 3.08           | 76.9            |
| x6         | 4.13           | 61.0            | GlcNAc6                | 3.58           | 60.3            |
| x7         | 4.30           | 59.4            | GlcNAc CH <sub>3</sub> | 1.83           | 23.0            |
| 1b         | 6.99           | 119.8           |                        |                |                 |
| 1e         | 6.89           | 119.0           | TEG a                  | 4.44           | 63.4            |
| 1f         | 6.80           | 125.7           | TEG h                  | 3.49           | 66.9            |
| 2b         | 7.17           | 130.8           | TEG i                  | 3.55           | 37.8            |
| 2e         | 7.10           | 124.8           | TEG bulk               | 3.48-3.38      | 70.0-69.0       |
| 3b         | 6.32           | 109.9           |                        |                |                 |
| 3d         | 6.33           | 104.8           | Triazole 4             | -              | 143.7           |
| 3f         | 6.56           | 103.9           | Triazole 5             | 7.71           | 124.2           |
| 4b         | 5.53           | 108.0           |                        |                |                 |
| 4f         | 5.08           | 104.6           | M 2,5                  | -              | 166.1           |
| 5e         | 6.61           | 116.5           | M 3,4                  | -              | 135.5           |
| 5f         | 6.63           | 125.4           |                        |                |                 |
| 6b         | 7.84           | 128.6           | Hexyl 1, 1'            | 3.23           | 31.1            |
| 6e         | 7.25           | 123.3           | Hexyl 2, 2'            | 1.55           | 30.0            |
| 6f         | 7.25           | 128.0           | Hexyl 3, 3'            | 1.34           | 27.4            |
| 7d         | 6.27           | 101.6           | Hexyl 4, 4'            | 1.24           | 30.7            |
| 7f         | 6.49           | 108.1           | Hexyl 5, 5'            | 1.24           | 22.0            |
| z6         | 5.43           | 75.7            | Hexyl 6, 6'            | 0.84           | 13.9            |
| z2/z'2     | 3.28/2.85      | 36.7            |                        |                |                 |

**Table S3.** (continued)  $^1\text{H}$  and  $^{13}\text{C}$  NMR data\* for the triazole-tetraethylene glycol linked bis-alkylthio maleimide derivatives of teicoplanin pseudoaglycon **40-46** (Series 3)

| assignment             | chemical shifts in ppm |              |                 |              |
|------------------------|------------------------|--------------|-----------------|--------------|
|                        | <b>40</b>              |              | <b>41</b>       |              |
|                        | $^{13}\text{C}$        | $^1\text{H}$ | $^{13}\text{C}$ | $^1\text{H}$ |
| x1                     | 64.3                   | 7.06         | 64.1            | 7.07         |
| x2                     | 55.4                   | 4.90         | 55.3            | 4.89         |
| x3                     | 58.5                   | 5.37         | 58.3            | 5.37         |
| x4                     | 54.7                   | 5.61         | 54.6            | 5.61         |
| x5                     | 53.7                   | 4.34         | 53.5            | 4.35         |
| x6                     | 61.0                   | 4.12         | 60.8            | 4.14         |
| x7                     | 59.2                   | 4.32         | 59.3            | 4.29         |
| 1e                     | 119.1                  | 6.90         | 118.9           | 6.91         |
| 2e                     | 124.6                  | 7.10         | 124.8           | 7.11         |
| 3b                     | 110.0                  | 6.32         | 109.9           | 6.32         |
| 3f                     | 104.0                  | 6.57         | 103.8           | 6.55         |
| 4b                     | 108.1                  | 5.54         | 107.9           | 5.53         |
| 5f                     | 125.4                  | 6.63         | 125.2           | 6.63         |
| 6b                     | 128.6                  | 7.86         | 128.4           | 7.84         |
| 7f                     | 108.2                  | 6.52         | 107.9           | 6.48         |
| z6                     | 75.2                   | 5.44         | 75.8            | 5.41         |
| z2/z'2                 | 36.7                   | 2.86/3.28    | 36.5            | 2.86/3.28    |
| GlcNAc1                | 98.4                   | 4.39         | 98.9            | 4.38         |
| GlcNAc CH <sub>3</sub> | 23.1                   | 1.84         | 22.9            | 1.83         |
| Triazole 4             | 143.7                  | -            | n.d.            | -            |
| Triazole 5             | 124.2                  | 7.71         | 124.5           | 7.72         |
| M 2,5                  | 166.0                  | -            | n.d.            | -            |
| M 3,4                  | 135.4                  | -            | n.d.            | -            |
| TEG a                  | 63.4                   | 4.44         | 63.2            | 4.43         |
| TEG h                  | 66.9                   | 3.50         | 66.7            | 3.49         |
| TEG i                  | 37.8                   | 3.55         | 37.7            | 3.55         |
| TEG bulk               | 70.2-69.2              | 3.49-3.41    | 69.8-68.8       | 3.49-3.41    |
| Propyl 1, 1'           | 33.0                   | 3.22         | -               | -            |
| Propyl 2, 2'           | 23.5                   | 1.59         | -               | -            |
| Propyl 3, 3'           | 12.8                   | 0.93         | -               | -            |
| Butyl 1, 1'            | -                      | -            | 30.7            | 3.23         |
| Butyl 2, 2'            | -                      | -            | 32.0            | 1.54         |
| Butyl 3, 3'            | -                      | -            | 20.9            | 1.36         |
| Butyl 4, 4'            | -                      | -            | 13.3            | 0.85         |

\*only signals that are crucial for identification are listed

**Table S3.** (continued)  $^1\text{H}$  and  $^{13}\text{C}$  NMR data\* for the triazole-TEG linked bis-alkylthio maleimide derivatives of teicoplanin pseudoaglycon **40-46** (Series 3)

| assignment                 | chemical shifts in ppm |              |                 |              |
|----------------------------|------------------------|--------------|-----------------|--------------|
|                            | <b>43</b>              |              | <b>44</b>       |              |
|                            | $^{13}\text{C}$        | $^1\text{H}$ | $^{13}\text{C}$ | $^1\text{H}$ |
| x1                         | 64.6                   | 7.04         | 64.2            | 7.08         |
| x2                         | 55.4                   | 4.96         | 55.5            | 4.87         |
| x3                         | 58.8                   | 5.35         | 58.4            | 5.39         |
| x4                         | 54.7                   | 5.59         | 54.8            | 5.63         |
| x5                         | 53.6                   | 4.35         | 53.7            | 4.34         |
| x6                         | 61.0                   | 4.16         | 61.1            | 4.12         |
| x7                         | 59.5                   | 4.27         | 59.1            | 4.33         |
| 1e                         | 119.0                  | 6.88         | 119.2           | 6.95         |
| 2e                         | 124.7                  | 7.03         | 125.0           | 7.17         |
| 3b                         | 110.0                  | 6.31         | 110.2           | 6.34         |
| 3f                         | 103.9                  | 6.56         | 104.1           | 6.54         |
| 4b                         | 108.0                  | 5.53         | 108.2           | 5.54         |
| 5f                         | 125.8                  | 6.63         | 125.6           | 6.64         |
| 6b                         | 128.7                  | 7.81         | 128.7           | 7.85         |
| 7f                         | 108.1                  | 6.50         | 107.8           | 6.45         |
| z6                         | 76.4                   | 5.36         | 75.8            | 5.40         |
| z2/z'2                     | 37.2                   | 2.83/3.25    | 36.4            | 2.90/3.31    |
| GlcNAc1                    | 99.6                   | 4.35         | 99.0            | 4.38         |
| GlcNAc CH <sub>3</sub>     | 23.2                   | 1.84         | 23.1            | 1.83         |
| Triazole 4                 | 143.7                  | -            | 143.8           | -            |
| Triazole 5                 | 124.3                  | 7.68         | 124.1           | 7.72         |
| M 2,5                      | 166.1                  | -            | 166.1           | -            |
| M 3,4                      | 135.6                  | -            | 135.6           | -            |
| TEG a                      | 63.5                   | 4.43         | 63.4            | 4.43         |
| TEG h                      | 67.0                   | 3.49         | 67.0            | 3.49         |
| TEG i                      | 37.9                   | 3.54         | 37.8            | 3.55         |
| TEG bulk                   | 69.8-68.9              | 3.49-3.39    | 69.8-69.0       | 3.49-3.39    |
| Alkyl $\alpha$ , $\alpha'$ | 31.2                   | 3.22         | 31.1            | 3.22         |
| Alkyl $\beta$ , $\beta'$   | 30.2                   | 1.55         | 30.1            | 1.55         |
| Alkyl $\gamma$ , $\gamma'$ | 27.9                   | 1.32         | 27.8            | 1.33         |
| Alkyl bulk**               | 28.7                   | 1.22         | 29.0            | 1.21         |
| Alkyl $\omega$ -2          | 31.3                   | 1.21         | 31.4            | 1.20         |
| Alkyl $\omega$ -1          | 22.3                   | 1.25         | 22.1            | 1.24         |
| Alkyl $\omega$             | 14.1                   | 0.83         | 13.9            | 0.84         |

\*only signals that are crucial for identification are listed

\*\*  $\delta$  to  $\omega$ -3 methylene groups of alkyl substituents

**Table S3.** (continued)  $^1\text{H}$  and  $^{13}\text{C}$  NMR data\* for the triazole-TEG linked bis-alkylthio maleimide derivatives of teicoplanin pseudoaglycon **40-46** (Series 3)

| assignment                  | chemical shifts in ppm |              |                 |              |
|-----------------------------|------------------------|--------------|-----------------|--------------|
|                             | 45                     |              | 46              |              |
|                             | $^{13}\text{C}$        | $^1\text{H}$ | $^{13}\text{C}$ | $^1\text{H}$ |
| x1                          | 64.5                   | 7.06         | 63.9            | 7.09         |
| x2                          | 55.2                   | 4.96         | 55.4            | 4.84         |
| x3                          | 58.6                   | 5.35         | 58.2            | 5.39         |
| x4                          | 54.4                   | 5.59         | 54.6            | 5.67         |
| x5                          | 53.4                   | 4.37         | 53.7            | 4.29         |
| x6                          | 60.7                   | 4.17         | 60.9            | 4.12         |
| x7                          | 59.3                   | 4.27         | 57.4            | 4.39         |
| 1e                          | 118.9                  | 6.89         | 119.1           | 6.94         |
| 2e                          | 124.6                  | 7.03         | 125.0           | 7.20         |
| 3b                          | 109.8                  | 6.32         | 110.2           | 6.33         |
| 3f                          | 103.7                  | 6.58         | 104.0           | 6.52         |
| 4b                          | 108.0                  | 5.54         | 108.2           | 5.53         |
| 5f                          | 125.4                  | 6.64         | 125.8           | 6.67         |
| 6b                          | 128.7                  | 7.82         | 128.7           | 7.85         |
| 7f                          | 108.0                  | 6.51         | 106.5           | 6.32         |
| z6                          | 76.2                   | 5.37         | 75.5            | 5.33         |
| z2/z'2                      | 37.1                   | 2.81/3.25    | 36.1            | 2.91/3.30    |
| GlcNAc1                     | 99.5                   | 4.37         | 98.6            | 4.34         |
| GlcNAc CH <sub>3</sub>      | 22.9                   | 1.85         | 23.1            | 1.86         |
| Triazole 4                  | 143.7                  | -            | 143.8           | -            |
| Triazole 5                  | 124.2                  | 7.69         | 124.1           | 7.74         |
| M 2,5                       | 166.0                  | -            | 166.1           | -            |
| M 3,4                       | 135.5                  | -            | 135.4           | -            |
| TEG a                       | 63.3                   | 4.44         | 63.2            | 4.43         |
| TEG h                       | 66.9                   | 3.48         | 66.8            | 3.49         |
| TEG i                       | 37.6                   | 3.54         | 37.6            | 3.54         |
| TEG bulk                    | 70.2-69.0              | 3.53-3.40    | 70.0-69.0       | .50-3.41     |
| TEG1, 1'                    | -                      | -            | 30.7            | 3.42         |
| TEG2, 2'                    | -                      | -            | 69.8            | 3.61         |
| TEG7, 7'                    | -                      | -            | 72.3            | 3.40         |
| TEG8, 8'                    | -                      | -            | 60.2            | 3.47         |
| $\alpha$ -G1                | 95.9                   | 5.44         | -               | -            |
|                             | 67.4                   | 3.83         | -               | -            |
| $\alpha$ -G2-5              | 69.7                   | 4.34         | -               | -            |
|                             | 70.3                   | 4.61         | -               | -            |
|                             | 71.1                   | 4.22         | -               | -            |
| $\alpha$ -G6                | 31.5                   | 3.46 / 3.29  | -               | -            |
| $\alpha$ -G-C <sub>q</sub>  | 108.6/108.0            | -            | -               | -            |
| $\alpha$ -G-CH <sub>3</sub> | 25.8/25.6              | 1.38/1.33    | -               | -            |
|                             | 24.5                   | 1.25         | -               | -            |

\*only signals that are crucial for identification are listed

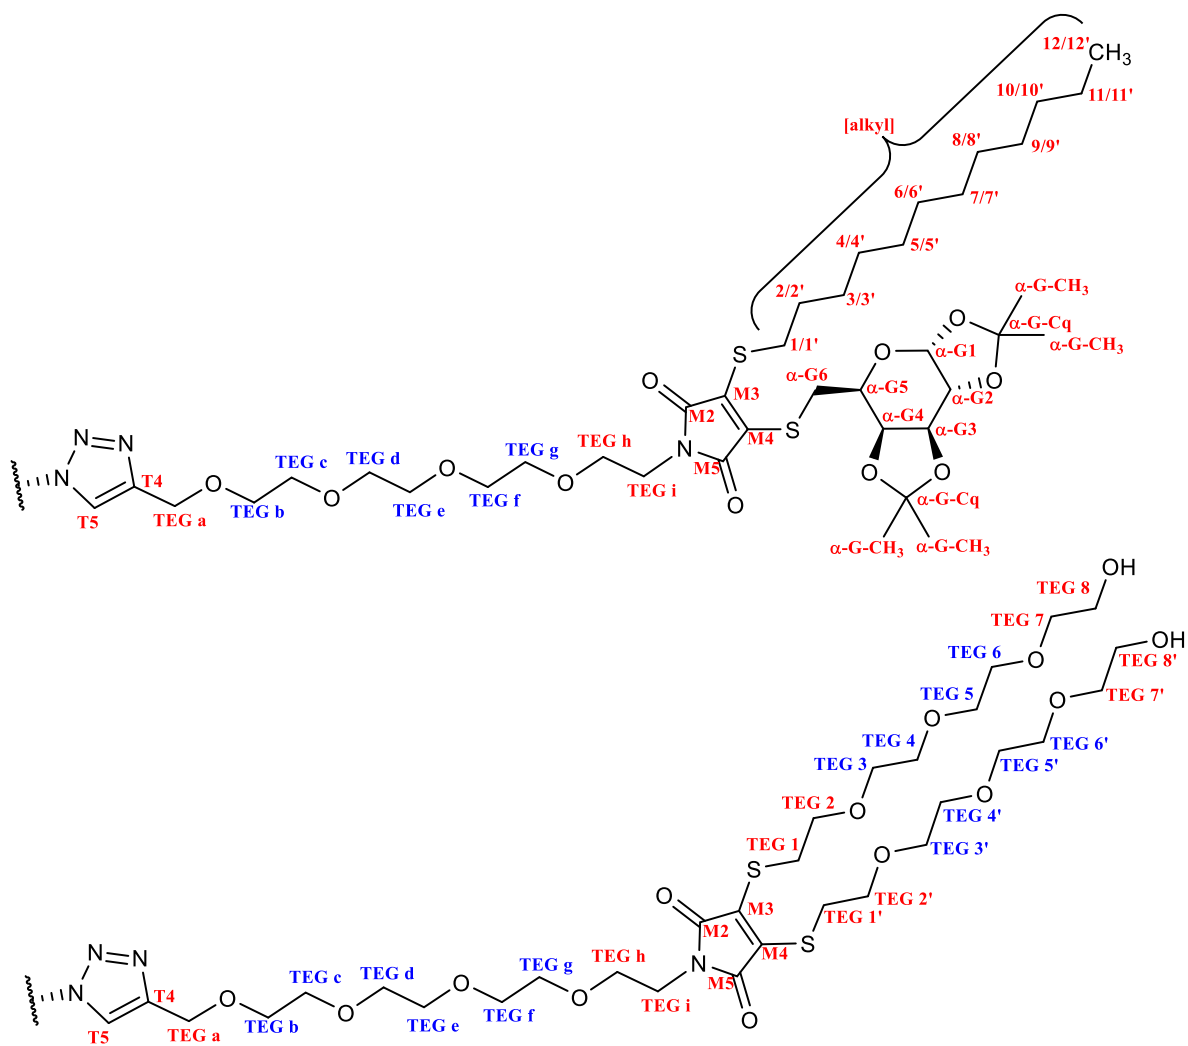

**Figure S4.** Atom numberings of Series 3 side chains for NMR assignment  
(First structure is an illustration)



**Table S4.** <sup>1</sup>H and <sup>13</sup>C NMR data for teicoplanin pseudoaglycon TEG-monoalkyl derivatives **60-63** (Series 5)

| assignment        | <b>60</b>       |                | <b>61</b>       |                |
|-------------------|-----------------|----------------|-----------------|----------------|
|                   | <sup>13</sup> C | <sup>1</sup> H | <sup>13</sup> C | <sup>1</sup> H |
| x1                | 64.1            | 7.07           | 64.2            | 7.07           |
| x2                | 55.5            | 4.86           | 55.4            | 4.88           |
| x3                | 58.4            | 5.38           | 58.3            | 5.38           |
| x4                | 54.7            | 5.62           | 54.8            | 5.62           |
| x5                | 53.6            | 4.34           | 53.7            | 4.34           |
| x6                | 61.0            | 4.11           | 61.0            | 4.14           |
| x7                | 59.4            | 4.30           | 59.4            | 4.30           |
| 1e                | 119.1           | 6.93           | 118.9           | 6.93           |
| 2e                | 124.9           | 7.15           | 124.9           | 7.14           |
| 3b                | 110.0           | 6.32           | 110.1           | 6.32           |
| 3f                | 104.0           | 6.55           | 104.0           | 6.56           |
| 4b                | 108.0           | 5.52           | 108.1           | 5.53           |
| 5f                | 125.3           | 6.61           | 125.4           | 6.62           |
| 6b                | 128.5           | 7.85           | 128.5           | 7.85           |
| 7f                | 107.9           | 6.48           | 108.0           | 6.48           |
| z6                | 75.6            | 5.43           | 75.9            | 5.41           |
| z2/z'2            | 36.4            | 2.88/3.30      | 36.5            | 2.88/3.28      |
| G1                | 98.8            | 4.39           | 99.0            | 4.38           |
| G-CH <sub>3</sub> | 23.1            | 1.82           | 23.1            | 1.83           |
| TA 4              | 144.0           | -              | 144.0           | -              |
| TA 5              | 124.1           | 7.71           | 124.1           | 7.71           |
| TA Me             | 63.3            | 4.43           | 63.4            | 4.43           |
| TB 4              | 143.8           | -              | 143.8           | -              |
| TB 5              | 124.2           | 8.01           | 124.2           | 8.01           |
| TB Me             | 63.3            | 4.45           | 63.4            | 4.45           |
| TEG bulk          | 69.6            | 3.43           | 69.7            | 3.43           |
|                   | 69.5            | 3.47           | 69.5            | 3.47           |
| TEG g             | 68.7            | 3.77           | 68.8            | 3.77           |
| TEG h             | 49.3            | 4.49           | 49.4            | 4.48           |
| Hexyl 1           | -               | -              | 69.6            | 3.39           |
| Hexyl 2           | -               | -              | 29.2            | 1.47           |
| Hexyl 3           | -               | -              | 25.4            | 1.25           |
| Hexyl 4           | -               | -              | 31.2            | 1.22           |
| Hexyl 5           | -               | -              | 22.1            | 1.23           |
| Hexyl 6           | -               | -              | 14.0            | 0.83           |
| Butyl 1           | 69.4            | 3.40           | -               | -              |
| Butyl 2           | 31.6            | 1.48           | -               | -              |
| Butyl 3           | 19.2            | 1.29           | -               | -              |
| Butyl 4           | 14.1            | 0.85           | -               | -              |

**Table S4.** (continued)  $^1\text{H}$  and  $^{13}\text{C}$  NMR data for teicoplanin pseudoaglycon TEG-monoalkyl derivatives **60-63** (Series 5)

| assignment        | <b>62</b>       |              | <b>63</b>       |              |
|-------------------|-----------------|--------------|-----------------|--------------|
|                   | $^{13}\text{C}$ | $^1\text{H}$ | $^{13}\text{C}$ | $^1\text{H}$ |
| x1                | 64.6            | 7.03         | 64.5            | 7.04         |
| x2                | 55.3            | 4.96         | 55.3            | 4.97         |
| x3                | 58.8            | 5.33         | 58.8            | 5.34         |
| x4                | 54.6            | 5.57         | 54.5            | 5.58         |
| x5                | 53.5            | 4.35         | 53.5            | 4.36         |
| x6                | 60.9            | 4.16         | 60.9            | 4.15         |
| x7                | 59.6            | 4.27         | 59.5            | 4.27         |
| 1e                | 119.0           | 6.85         | 119.0           | 6.86         |
| 2e                | 124.7           | 7.00         | 124.6           | 7.00         |
| 3b                | 109.7           | 6.30         | 109.8           | 6.31         |
| 3f                | 103.7           | 6.56         | 103.7           | 6.58         |
| 4b                | 108.0           | 5.53         | 107.9           | 5.53         |
| 5f                | 125.5           | 6.63         | 125.4           | 6.62         |
| 6b                | 128.7           | 7.80         | 128.6           | 7.81         |
| 7f                | 108.0           | 6.47         | 108.0           | 6.48         |
| z6                | 76.2            | 5.36         | 76.2            | 5.38         |
| z2/z'2            | 37.3            | 2.79/3.22    | 37.2            | 2.80/3.23    |
| G1                | 99.6            | 4.34         | 99.5            | 4.35         |
| G-CH <sub>3</sub> | 23.1            | 1.84         | 23.0            | 1.84         |
| <hr/>             |                 |              |                 |              |
| TA 4              | 144.1           | -            | 143.6           | -            |
| TA 5              | 124.2           | 7.67         | 124.3           | 7.67         |
| TA Me             | 63.3            | 4.41         | 63.4            | 4.40         |
| TB 4              | 144.4           | -            | 144.0           | -            |
| TB 5              | 124.2           | 8.01         | 124.3           | 8.01         |
| TB Me             | 63.3            | 4.44         | 63.4            | 4.44         |
| <hr/>             |                 |              |                 |              |
| TEG bulk          | 69.7            | 3.43         | 69.7            | 3.44         |
|                   | 69.6            | 3.47         | 69.5            | 3.48         |
| TEG g             | 68.7            | 3.77         | 68.7            | 3.77         |
| TEG h             | 49.4            | 4.47         | 49.3            | 4.48         |
| <hr/>             |                 |              |                 |              |
| Decyl 1           | -               | -            | 69.6            | 3.39         |
| Decyl 2           | -               | -            | 29.2            | 1.46         |
| Decyl 3           | -               | -            | 25.7            | 1.23         |
| Decyl 4-7         | -               | -            | 28.9            | 1.22         |
| Decyl 8           | -               | -            | 31.3            | 1.22         |
| Decyl 9           | -               | -            | 22.1            | 1.23         |
| Decyl 10          | -               | -            | 14.0            | 0.84         |
| <hr/>             |                 |              |                 |              |
| Octyl 1           | 69.5            | 3.39         | -               | -            |
| Octyl 2           | 29.2            | 1.46         | -               | -            |
| Octyl 3           | 25.6            | 1.25         | -               | -            |
| Octyl 4-5         | 28.8            | 1.23         | -               | -            |
| Octyl 6           | 31.3            | 1.20         | -               | -            |
| Octyl 7           | 22.1            | 1.25         | -               | -            |
| Octyl 8           | 13.6            | 0.84         | -               | -            |

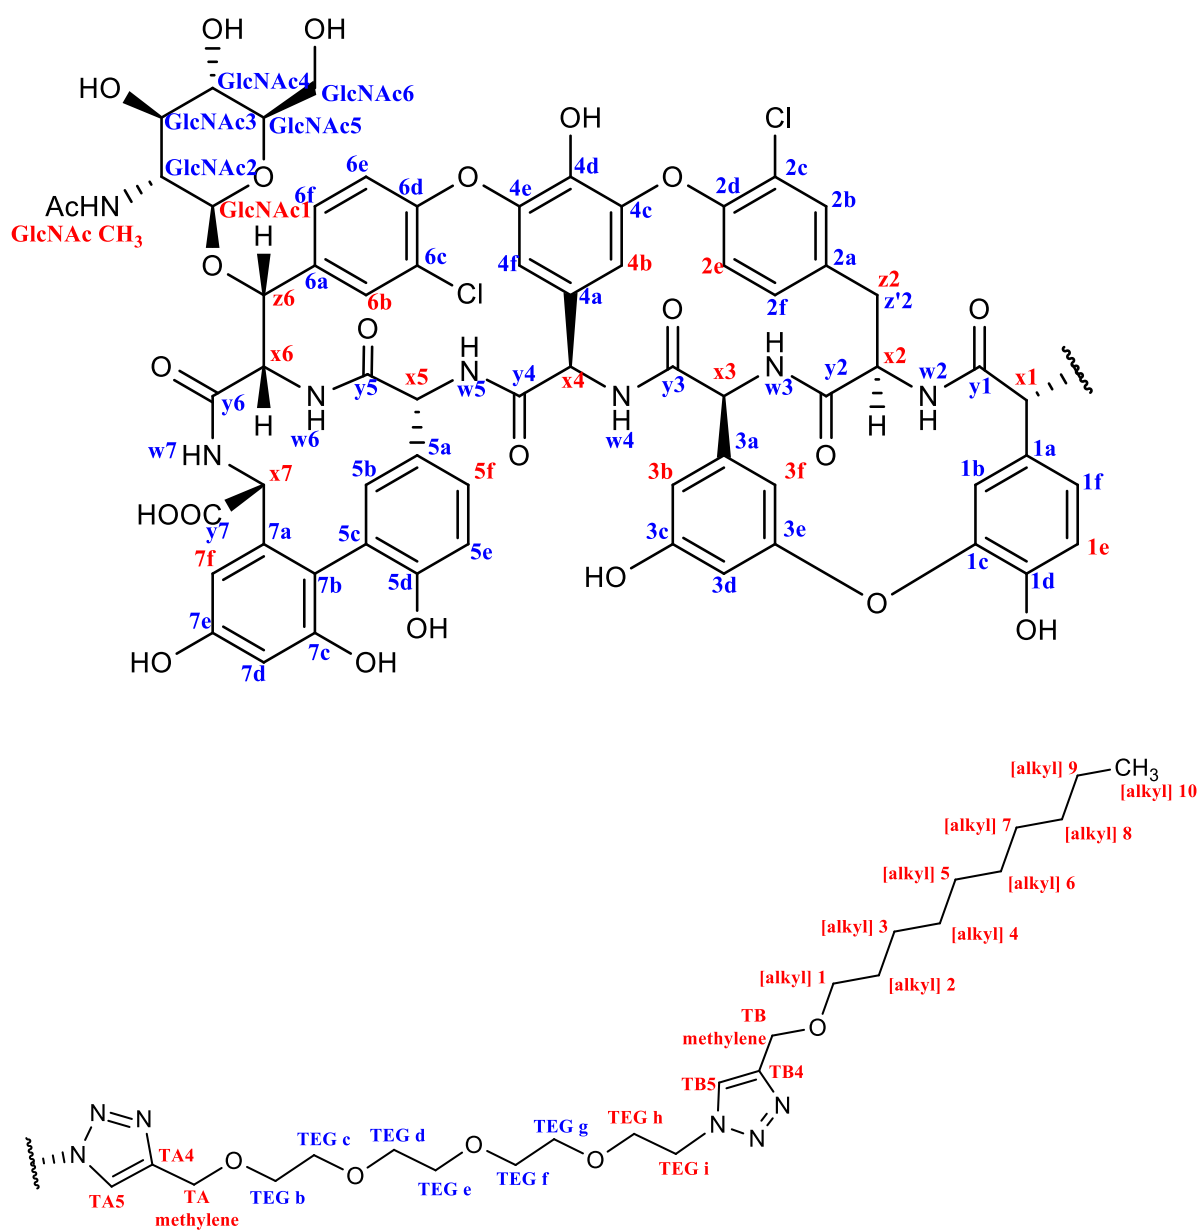

**Figure S5.** Atom numberings of Series 5 side chains for NMR assignment

**Table S5.**  $^1\text{H}$  and  $^{13}\text{C}$  NMR data for the sulfonamide derivatives **72-79** of teicoplanin pseudoaglycon (Series 6)

| assignment        | chemical shifts in ppm |                   |                   |                   |
|-------------------|------------------------|-------------------|-------------------|-------------------|
|                   | <b>72</b>              |                   | <b>73</b>         |                   |
|                   | $^{13}\text{C}$        | $^1\text{H}$      | $^{13}\text{C}$   | $^1\text{H}$      |
| x1                | 58.2 <sup>a</sup>      | 5.27 <sup>a</sup> | 58.1 <sup>a</sup> | 5.27 <sup>a</sup> |
| x2                | 55.2                   | 4.25              | 55.2              | 4.24              |
| x3                | 58.0 <sup>a</sup>      | 5.20 <sup>a</sup> | 58.1 <sup>a</sup> | 5.27 <sup>a</sup> |
| x4                | 54.7                   | 5.60              | 54.7              | 5.60              |
| x5                | 53.7                   | 4.31              | 53.7              | 4.32              |
| x6                | 61.0                   | 4.11              | 61.0              | 4.13              |
| x7                | 59.0                   | 4.32              | 59.3              | 4.32              |
| 1e                | 118.5                  | 6.92              | 118.6             | 6.68              |
| 2e                | 124.8                  | 7.20              | 124.9             | 7.20              |
| 3b                | 110.0                  | 6.27              | 110.1             | 6.27              |
| 3f                | 104.3                  | 6.39              | 104.4             | 6.39              |
| 4b                | 107.7                  | 5.45              | 107.8             | 5.46              |
| 5f                | 125.3                  | 6.62              | 125.4             | 6.63              |
| 6b                | 128.5                  | 7.85              | 128.7             | 7.86              |
| 7f                | 107.8                  | 6.46              | 107.9             | 6.50              |
| z6                | 75.8                   | 5.39              | 76.1              | 5.38              |
| z2/z'2            | 35.6                   | 2.43/3.15         | 36.0              | 2.50/3.15         |
| G1                | 99.0                   | 4.38              | 99.3              | 4.36              |
| G-CH <sub>3</sub> | 23.1                   | 1.83              | 23.1              | 1.84              |
| T2,6              | 127.1                  | 7.73              | -                 | -                 |
| T3,5              | 129.3                  | 7.38              | -                 | -                 |
| T-Me              | 21.0                   | 2.37              | -                 | -                 |
| BS1               | -                      | -                 | 140.9             | -                 |
| BS2,6             | -                      | -                 | 127.0             | 7.86              |
| BS3,5             | -                      | -                 | 128.9             | 7.59              |
| BS4               | -                      | -                 | 132.6             | 7.64              |

<sup>a</sup>ambiguous

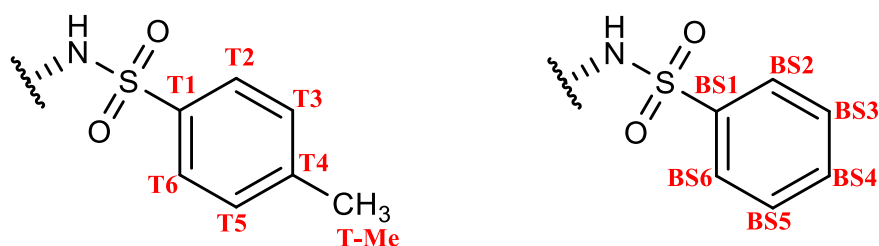

**Figure S6.** Atom numberings of Series 6 side chains for NMR assignment (for compounds **72** and **73**, respectively)

**Table S5.** (continued)  $^1\text{H}$  and  $^{13}\text{C}$  NMR data for the sulfonamide derivatives **72-79** of teicoplanin pseudoaglycon (Series 6)

| assignment        | chemical shifts in ppm |                   |                 |              |
|-------------------|------------------------|-------------------|-----------------|--------------|
|                   | <b>74</b>              |                   | <b>75</b>       |              |
|                   | $^{13}\text{C}$        | $^1\text{H}$      | $^{13}\text{C}$ | $^1\text{H}$ |
| x1                | 58.2 <sup>a</sup>      | 5.24 <sup>a</sup> | 58.1            | 5.29         |
| x2                | 55.6                   | 4.29              | 55.3            | 4.27         |
| x3                | 58.4 <sup>a</sup>      | 5.29 <sup>a</sup> | 58.3            | 5.28         |
| x4                | 54.8                   | 5.61              | 54.7            | 5.60         |
| x5                | 53.8                   | 4.33              | 53.7            | 4.32         |
| x6                | 61.1                   | 4.14              | 61.0            | 4.13         |
| x7                | 59.5                   | 4.32              | 59.3            | 4.33         |
| 1e                | 118.6                  | 6.64              | 118.5           | 6.67         |
| 2e                | 125.0                  | 7.18              | 124.8           | 7.20         |
| 3b                | 110.1                  | 6.28              | 110.1           | 6.26         |
| 3f                | 104.4                  | 6.40              | 104.4           | 6.40         |
| 4b                | 107.8                  | 5.47              | 107.7           | 5.45         |
| 5f                | 125.5                  | 6.64              | 125.4           | 6.63         |
| 6b                | 128.3                  | 7.84              | 128.6           | 7.86         |
| 7f                | 108.0                  | 6.48              | 107.9           | 6.50         |
| z6                | 76.5                   | 5.37              | 75.9            | 5.39         |
| z2/z'2            | 36.0                   | 2.52/3.14         | 35.9            | 2.50/3.07    |
| G1                | 99.6                   | 4.38              | 99.1            | 4.36         |
| G-CH <sub>3</sub> | 23.2                   | 1.85              | 23.2            | 1.85         |
| <hr/>             |                        |                   |                 |              |
| P1                | 134.4                  | -                 | -               | -            |
| P2,6              | 128.2                  | 7.77              | -               | -            |
| P3,5              | 118.4                  | 7.77              | -               | -            |
| P4                | 144.9                  | -                 | -               | -            |
| P7                | 171.9                  | -                 | -               | -            |
| P8 (NHAc)         | 24.3                   | 2.09              | -               | -            |
| <hr/>             |                        |                   |                 |              |
| BPh1              | -                      | -                 | 139.6           | -            |
| BPh2,6            | -                      | -                 | 127.6           | 7.93         |
| BPh3,5            | -                      | -                 | 127.0           | 7.89         |
| BPh4              | -                      | -                 | 144.0           | -            |
| BPh7              | -                      | -                 | 138.6           | -            |
| BPh8,12           | -                      | -                 | 127.1           | 7.72         |
| BPh9,11           | -                      | -                 | 129.3           | 7.52         |
| BPh10             | -                      | -                 | 128.6           | 7.45         |

<sup>a</sup> ambiguous

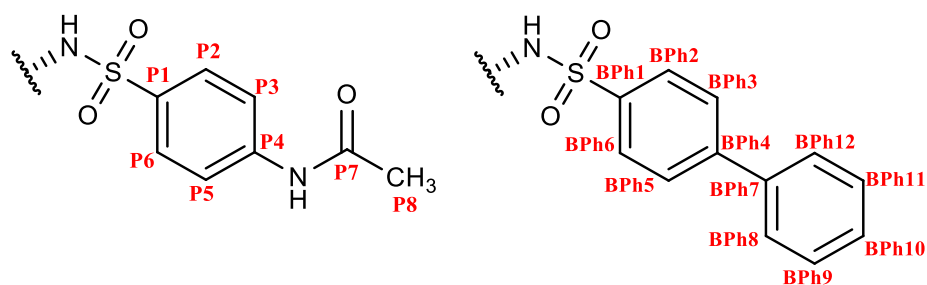

**Figure S7.** Atom numberings of Series 6 side chains for NMR assignment (for compounds **74** and **75**, respectively)

**Table S5.** (continued)  $^1\text{H}$  and  $^{13}\text{C}$  NMR data for the sulfonamide derivatives **72-79** of teicoplanin pseudoaglycon (Series 6)

| assignment                  | chemical shifts in ppm |                   |                    |                   |
|-----------------------------|------------------------|-------------------|--------------------|-------------------|
|                             | <b>76</b>              |                   | <b>77</b>          |                   |
|                             | $^{13}\text{C}$        | $^1\text{H}$      | $^{13}\text{C}$    | $^1\text{H}$      |
| x1                          | 58.2 <sup>a</sup>      | 5.21 <sup>a</sup> | 58.16 <sup>a</sup> | 5.34 <sup>a</sup> |
| x2                          | 54.9                   | 4.06              | 55.33              | 4.89              |
| x3                          | 58.2 <sup>a</sup>      | 5.21 <sup>a</sup> | 58.16 <sup>a</sup> | 5.34 <sup>a</sup> |
| x4                          | 54.8                   | 5.59              | 54.69              | 5.62              |
| x5                          | 53.7                   | 4.30              | 53.66              | 4.32              |
| x6                          | 61.0                   | 4.13              | 60.89              | 4.12              |
| x7                          | 59.3                   | 4.33              | 59.20              | 4.30              |
| 1e                          | 118.6                  | 6.88              | 118.47             | 6.96              |
| 2e                          | 124.9                  | 7.20              | 124.83             | 7.19              |
| 3b                          | 110.2                  | 6.25              | 109.83             | 6.31              |
| 3f                          | 104.2                  | 6.34              | 103.83             | 6.41              |
| 4b                          | 107.7                  | 5.44              | 107.54             | 5.48              |
| 5f                          | 125.5                  | 6.63              | 125.29             | 6.63              |
| 6b                          | 128.7                  | 7.87              | 128.45             | 7.85              |
| 7f                          | 108.0                  | 6.50              | 107.83             | 6.48              |
| z6                          | 76.1                   | 5.38              | 75.43              | 5.41              |
| z2/z'2                      | 36.0                   | 2.20/3.02         | 36.47              | 2.78/3.33         |
| G1                          | 99.3                   | 4.36              | 98.64              | 4.38              |
| G-CH <sub>3</sub>           | 23.1                   | 1.85              | 23.03              | 1.83              |
| Ds2                         | 120.0                  | 8.36              | -                  | -                 |
| Ds3                         | 127.8                  | 7.56              | -                  | -                 |
| Ds4                         | 115.2                  | 7.25              | -                  | -                 |
| Ds5                         | 151.1                  | -                 | -                  | -                 |
|                             | 129.9                  | 8.48              | -                  | -                 |
| Ds6-8                       | 128.9                  | 8.31              | -                  | -                 |
|                             | 123.5                  | 7.69              | -                  | -                 |
| Ds11-12 (NMe <sub>2</sub> ) | 45.2                   | 2.82              |                    |                   |
| Hexyl 1                     | -                      | -                 | 52.56              | 2.93              |
| Hexyl 2                     | -                      | -                 | 22.89              | 1.63              |
| Hexyl 3                     | -                      | -                 | 27.34              | 1.31              |
| Hexyl 4                     | -                      | -                 | 30.83              | 1.23              |
| Hexyl 5                     | -                      | -                 | 21.90              | 1.25              |
| Hexyl 6                     | -                      | -                 | 13.90              | 0.85              |

<sup>a</sup> ambiguous

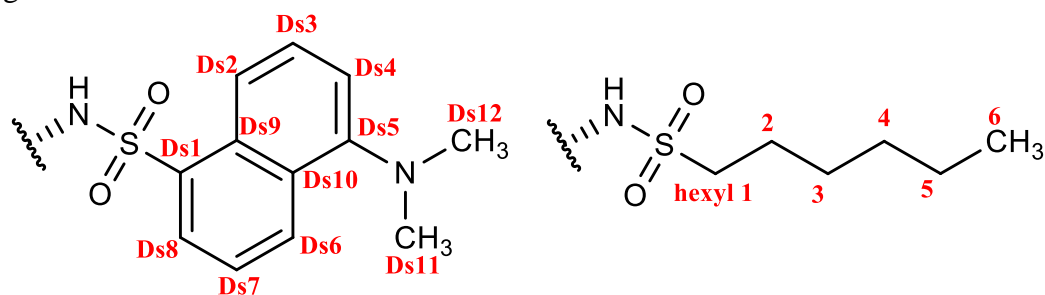

**Figure S8.** Atom numberings of Series 6 side chains for NMR assignment (for compounds **76** and **77**, respectively)

**Table S5.** (continued)  $^1\text{H}$  and  $^{13}\text{C}$  NMR data for the sulfonamide derivatives **72-79** of teicoplanin pseudoaglycon (Series 6)

| assignment        | chemical shifts in ppm |                   |                 |              |
|-------------------|------------------------|-------------------|-----------------|--------------|
|                   | <b>78</b>              |                   | <b>79</b>       |              |
|                   | $^{13}\text{C}$        | $^1\text{H}$      | $^{13}\text{C}$ | $^1\text{H}$ |
| x1                | 58.2 <sup>a</sup>      | 5.35 <sup>a</sup> | 58.1            | 5.35         |
| x2                | 55.4                   | 4.88              | 55.3            | 4.91         |
| x3                | 58.2 <sup>a</sup>      | 5.33 <sup>a</sup> | 58.1            | 5.35         |
| x4                | 54.7                   | 5.63              | 54.7            | 5.62         |
| x5                | 53.7                   | 4.32              | 53.6            | 4.32         |
| x6                | 61.0                   | 4.15              | 60.9            | 4.13         |
| x7                | 58.9                   | 4.31              | 59.2            | 4.30         |
| 1e                | 118.5                  | 7.00              | 118.5           | 6.95         |
| 2e                | 125.0                  | 7.19              | 124.8           | 7.19         |
| 3b                | 109.9                  | 6.30              | 109.8           | 6.31         |
| 3f                | 103.9                  | 6.38              | 103.8           | 6.42         |
| 4b                | 107.9                  | 5.49              | 107.7           | 5.49         |
| 5f                | 125.5                  | 6.64              | 125.3           | 6.62         |
| 6b                | 128.6                  | 7.85              | 128.5           | 7.86         |
| 7f                | 107.7                  | 6.43              | 107.9           | 6.50         |
| z6                | 76.2                   | 5.34              | 75.5            | 5.43         |
| z2/z'2            | 36.5                   | 2.77/3.33         | 36.6            | 2.79/3.34    |
| G1                | 99.4                   | 4.35              | 98.7            | 4.39         |
| G-CH <sub>3</sub> | 23.1                   | 1.82              | 23.0            | 1.83         |
| Octyl 1           | 52.62                  | 2.93              | -               | -            |
| Octyl 2           | 22.98                  | 1.63              | -               | -            |
| Octyl 3           | 27.89                  | 1.31              | -               | -            |
| Octyl 4-5         | 28.71                  | 1.23              | -               | -            |
| Octyl 6           | 31.28                  | 1.22              | -               | -            |
| Octyl 7           | 22.10                  | 1.24              | -               | -            |
| Octyl 8           | 13.99                  | 0.84              | -               | -            |
| Dodecyl 1         | -                      | -                 | 52.5            | 2.94         |
| Dodecyl 2         | -                      | -                 | 22.9            | 1.63         |
| Dodecyl 3         | -                      | -                 | 27.6            | 1.31         |
| Dodecyl 4-9       | -                      | -                 | 28.9            | 1.22         |
| Dodecyl 10        | -                      | -                 | 31.2            | 1.21         |
| Dodecyl 11        | -                      | -                 | 22.0            | 1.24         |
| Dodecyl 12        | -                      | -                 | 13.9            | 0.84         |

<sup>a</sup> ambiguous

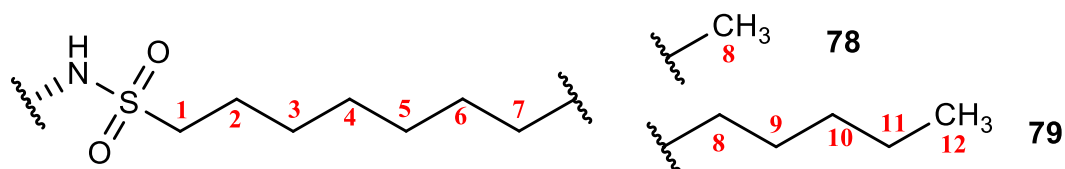

**Figure S9.** Atom numberings of Series 6 side chains for NMR assignment (for compounds **78** and **79**)

**Table S6.** Activity in human coronavirus 229E-infected human HEL<sup>a</sup> or A549<sup>b</sup> cells.

| Compound                 | CPE reduction assay<br>in HEL cells <sup>a</sup> |      | Virus yield assay<br>in A549 cells <sup>b</sup> |                  |     |
|--------------------------|--------------------------------------------------|------|-------------------------------------------------|------------------|-----|
|                          | EC <sub>50</sub>                                 | MCC  | EC <sub>99</sub>                                | EC <sub>90</sub> | MCC |
| μM                       |                                                  |      |                                                 |                  |     |
| <b>13</b>                | 5.4                                              | ≥20  | 10                                              | 4.1              | 50  |
| <b>14</b>                | 5.4                                              | ≥20  | 9.4                                             | 5.8              | 50  |
| <b>27</b>                | 5.4                                              | ≥20  | 11                                              | 5.9              | >50 |
| <b>28</b>                | 8.9                                              | ≥20  | 9.5                                             | 6.4              | ≥50 |
| <b>41</b>                | 8.9                                              | ≥100 | 29                                              | 8.6              | >50 |
| <b>42</b>                | 5.4                                              | ≥20  | 21                                              | 7.6              | >50 |
| <b>60</b>                | ≥100                                             | ≥100 | ND                                              | ND               | ND  |
| <b>61</b>                | 44                                               | ≥100 | 44                                              | 25               | >50 |
| <b>62</b>                | 8.9                                              | 100  | 30                                              | 23               | >50 |
| <b>72</b>                | 5.2                                              | ≥100 | 10                                              | 4.9              | >50 |
| <b>73</b>                | 5.5                                              | ≥20  | 11                                              | 6.8              | >50 |
| <b>74</b>                | >100                                             | ≥20  | ND                                              | ND               | ND  |
| <b>75</b>                | >100                                             | 4    | ND                                              | ND               | ND  |
| <b>76</b>                | >100                                             | ≥4   | ND                                              | ND               | ND  |
| <b>77</b>                | 1.5                                              | 20   | ND                                              | ND               | ND  |
| <b>78</b>                | 5.4                                              | ≥20  | 9.4                                             | 5.7              | >50 |
| <b>79</b>                | 1.8                                              | 20   | 4.7                                             | 2.8              | 50  |
| UDA (μg/ml) <sup>c</sup> | 1.8                                              | >100 | ND                                              | ND               | ND  |
| K22 (μM) <sup>c</sup>    | ND                                               | ND   | 15                                              | 11               | ≥50 |

<sup>a</sup>HEL: human embryonic lung fibroblast cells. Antiviral EC<sub>50</sub>: compound concentration producing 50% inhibition of virus replication, as estimated by microscopic scoring of the cytopathic effect (CPE). MCC: minimum cytotoxic concentration, i.e. compound concentration producing minimal changes in cell morphology, as estimated by microscopy.

<sup>b</sup>A549: human lung epithelial carcinoma cells. Antiviral activity expressed as the compound concentration causing a 2-log<sub>10</sub> (EC<sub>99</sub>) and 1-log<sub>10</sub> (EC<sub>90</sub>) reduction in virus yield at 72 h p.i., as determined by real-time RT-PCR.

<sup>c</sup>Reference compounds: UDA (*Urtica dioica* agglutinin) lectin, concentration expressed in μg/ml; K22 [(Z)-N-(3-(4-(4-bromophenyl)-4-hydroxypiperidin-1-yl)-3-oxo-1-phenylprop-1-en-2-yl)benzamide]<sup>1</sup>, concentration expressed in μM.

Data represent the averages of two independent tests. ND, not determined.



**Table S7.** Elemental analysis data (C, H, N, S) for teicoplanin derivatives.

| #  | formula                                                                                          | C      |       | H      |       | N      |       | S      |       |
|----|--------------------------------------------------------------------------------------------------|--------|-------|--------|-------|--------|-------|--------|-------|
|    |                                                                                                  | Calcd. | Found | Calcd. | Found | Calcd. | Found | Calcd. | Found |
| 13 | C <sub>78</sub> H <sub>74</sub> Cl <sub>2</sub> N <sub>8</sub> O <sub>25</sub> S <sub>2</sub>    | 56.49  | 56.35 | 4.50   | 4.65  | 6.76   | 6.63  | 3.87   | 3.75  |
| 14 | C <sub>82</sub> H <sub>82</sub> Cl <sub>2</sub> N <sub>8</sub> O <sub>25</sub> S <sub>2</sub>    | 57.44  | 57.39 | 4.82   | 5.09  | 6.54   | 6.40  | 3.74   | 3.67  |
| 17 | C <sub>85</sub> H <sub>88</sub> Cl <sub>2</sub> N <sub>8</sub> O <sub>25</sub> S <sub>2</sub>    | 58.12  | 57.95 | 5.05   | 5.21  | 6.38   | 6.25  | 3.65   | 3.44  |
| 26 | C <sub>79</sub> H <sub>73</sub> Cl <sub>2</sub> N <sub>11</sub> O <sub>25</sub> S <sub>2</sub>   | 55.44  | 55.32 | 4.30   | 4.48  | 9.00   | 8.87  | 3.75   | 3.63  |
| 27 | C <sub>81</sub> H <sub>77</sub> Cl <sub>2</sub> N <sub>11</sub> O <sub>25</sub> S <sub>2</sub>   | 55.93  | 55.68 | 4.46   | 4.69  | 8.86   | 8.80  | 3.69   | 3.59  |
| 28 | C <sub>85</sub> H <sub>85</sub> Cl <sub>2</sub> N <sub>11</sub> O <sub>25</sub> S <sub>2</sub>   | 56.85  | 56.57 | 4.77   | 5.02  | 8.58   | 8.45  | 3.57   | 3.51  |
| 29 | C <sub>89</sub> H <sub>93</sub> Cl <sub>2</sub> N <sub>11</sub> O <sub>25</sub> S <sub>2</sub>   | 57.73  | 57.57 | 5.06   | 5.28  | 8.32   | 8.28  | 3.46   | 3.38  |
| 30 | C <sub>97</sub> H <sub>109</sub> Cl <sub>2</sub> N <sub>11</sub> O <sub>25</sub> S <sub>2</sub>  | 59.32  | 59.22 | 5.59   | 5.84  | 7.85   | 7.65  | 3.26   | 3.14  |
| 31 | C <sub>97</sub> H <sub>97</sub> Cl <sub>2</sub> N <sub>11</sub> O <sub>35</sub> S <sub>2</sub>   | 55.17  | 55.25 | 4.63   | 4.91  | 7.30   | 7.13  | 3.04   | 2.92  |
| 40 | C <sub>87</sub> H <sub>89</sub> Cl <sub>2</sub> N <sub>11</sub> O <sub>29</sub> S <sub>2</sub>   | 55.36  | 55.18 | 4.75   | 4.98  | 8.16   | 8.10  | 3.40   | 3.29  |
| 41 | C <sub>89</sub> H <sub>93</sub> Cl <sub>2</sub> N <sub>11</sub> O <sub>29</sub> S <sub>2</sub>   | 55.80  | 55.62 | 4.89   | 5.05  | 8.04   | 7.92  | 3.35   | 3.27  |
| 42 | C <sub>93</sub> H <sub>101</sub> Cl <sub>2</sub> N <sub>11</sub> O <sub>29</sub> S <sub>2</sub>  | 56.65  | 55.48 | 5.16   | 5.34  | 7.81   | 7.67  | 3.25   | 3.18  |
| 43 | C <sub>97</sub> H <sub>109</sub> Cl <sub>2</sub> N <sub>11</sub> O <sub>29</sub> S <sub>2</sub>  | 57.45  | 57.32 | 5.42   | 5.53  | 7.60   | 7.54  | 3.16   | 3.05  |
| 44 | C <sub>105</sub> H <sub>125</sub> Cl <sub>2</sub> N <sub>11</sub> O <sub>29</sub> S <sub>2</sub> | 58.93  | 58.70 | 5.89   | 6.02  | 7.20   | 7.11  | 3.00   | 2.91  |
| 45 | C <sub>105</sub> H <sub>113</sub> Cl <sub>2</sub> N <sub>11</sub> O <sub>39</sub> S <sub>2</sub> | 55.12  | 54.95 | 4.98   | 5.09  | 6.73   | 6.61  | 2.80   | 2.70  |
| 46 | C <sub>97</sub> H <sub>109</sub> Cl <sub>2</sub> N <sub>11</sub> O <sub>37</sub> S <sub>2</sub>  | 54.04  | 53.85 | 5.10   | 5.18  | 7.15   | 7.07  | 2.97   | 2.83  |
| 60 | C <sub>84</sub> H <sub>87</sub> Cl <sub>2</sub> N <sub>13</sub> O <sub>28</sub>                  | 56.13  | 55.89 | 4.88   | 5.03  | 10.13  | 10.02 | -      | -     |
| 61 | C <sub>86</sub> H <sub>91</sub> Cl <sub>2</sub> N <sub>13</sub> O <sub>28</sub>                  | 56.58  | 56.35 | 5.02   | 5.11  | 9.97   | 9.80  | -      | -     |
| 62 | C <sub>88</sub> H <sub>95</sub> Cl <sub>2</sub> N <sub>13</sub> O <sub>28</sub>                  | 57.02  | 56.88 | 5.17   | 5.29  | 9.82   | 9.64  | -      | -     |
| 63 | C <sub>90</sub> H <sub>99</sub> Cl <sub>2</sub> N <sub>13</sub> O <sub>28</sub>                  | 57.45  | 57.35 | 5.30   | 5.47  | 9.68   | 9.49  | -      | -     |
| 72 | C <sub>73</sub> H <sub>64</sub> Cl <sub>2</sub> N <sub>8</sub> O <sub>25</sub> S                 | 56.34  | 56.32 | 4.15   | 4.36  | 7.20   | 7.08  | 2.06   | 1.95  |
| 73 | C <sub>72</sub> H <sub>62</sub> Cl <sub>2</sub> N <sub>8</sub> O <sub>25</sub> S                 | 56.07  | 56.11 | 4.05   | 4.24  | 7.27   | 7.13  | 2.08   | 1.94  |
| 74 | C <sub>74</sub> H <sub>65</sub> Cl <sub>2</sub> N <sub>9</sub> O <sub>26</sub> S                 | 55.57  | 55.34 | 4.10   | 4.18  | 7.88   | 7.66  | 2.00   | 1.94  |
| 75 | C <sub>78</sub> H <sub>66</sub> Cl <sub>2</sub> N <sub>8</sub> O <sub>25</sub> S                 | 57.89  | 57.95 | 4.11   | 4.22  | 6.92   | 6.75  | 1.98   | 1.90  |
| 76 | C <sub>78</sub> H <sub>69</sub> Cl <sub>2</sub> N <sub>9</sub> O <sub>25</sub> S                 | 57.29  | 57.32 | 4.25   | 4.50  | 7.71   | 7.44  | 1.96   | 1.88  |
| 77 | C <sub>72</sub> H <sub>70</sub> Cl <sub>2</sub> N <sub>8</sub> O <sub>25</sub> S                 | 55.78  | 55.57 | 4.55   | 4.78  | 7.23   | 7.10  | 2.07   | 1.97  |
| 78 | C <sub>74</sub> H <sub>74</sub> Cl <sub>2</sub> N <sub>8</sub> O <sub>25</sub> S                 | 56.31  | 56.08 | 4.73   | 4.88  | 7.10   | 6.98  | 2.03   | 1.96  |
| 79 | C <sub>78</sub> H <sub>82</sub> Cl <sub>2</sub> N <sub>8</sub> O <sub>25</sub> S                 | 57.32  | 57.04 | 5.06   | 5.11  | 6.86   | 6.82  | 1.96   | 1.91  |

## References

1. Lundin, A.; Dijkman, R.; Bergström, T.; Kann, N.; Adamiak, B.; Hannoun, C.; Kindler, E.; Jónsdóttir, H. R.; Muth, D.; Kint, J.; Forlenza, M.; Müller, M. A.; Drosten, C.; Thiel, V.; Trybala, E. Targeting membrane-bound viral RNA synthesis reveals potent inhibition of diverse coronaviruses including the middle East respiratory syndrome virus. *PLoS Pathog.* **2014**, *10*, e1004166.

Compound 5a  
1H

$^1\text{H NMR}$  (400 MHz,  $\text{CDCl}_3$ )  $\delta$  8.07 (s, 1H), 3.29 (t,  $J = 7.3$  Hz, 4H),  
1.69 – 1.58 (m, 4H), 1.52 – 1.35 (m, 4H), 0.93 (t,  $J = 7.3$  Hz, 6H).

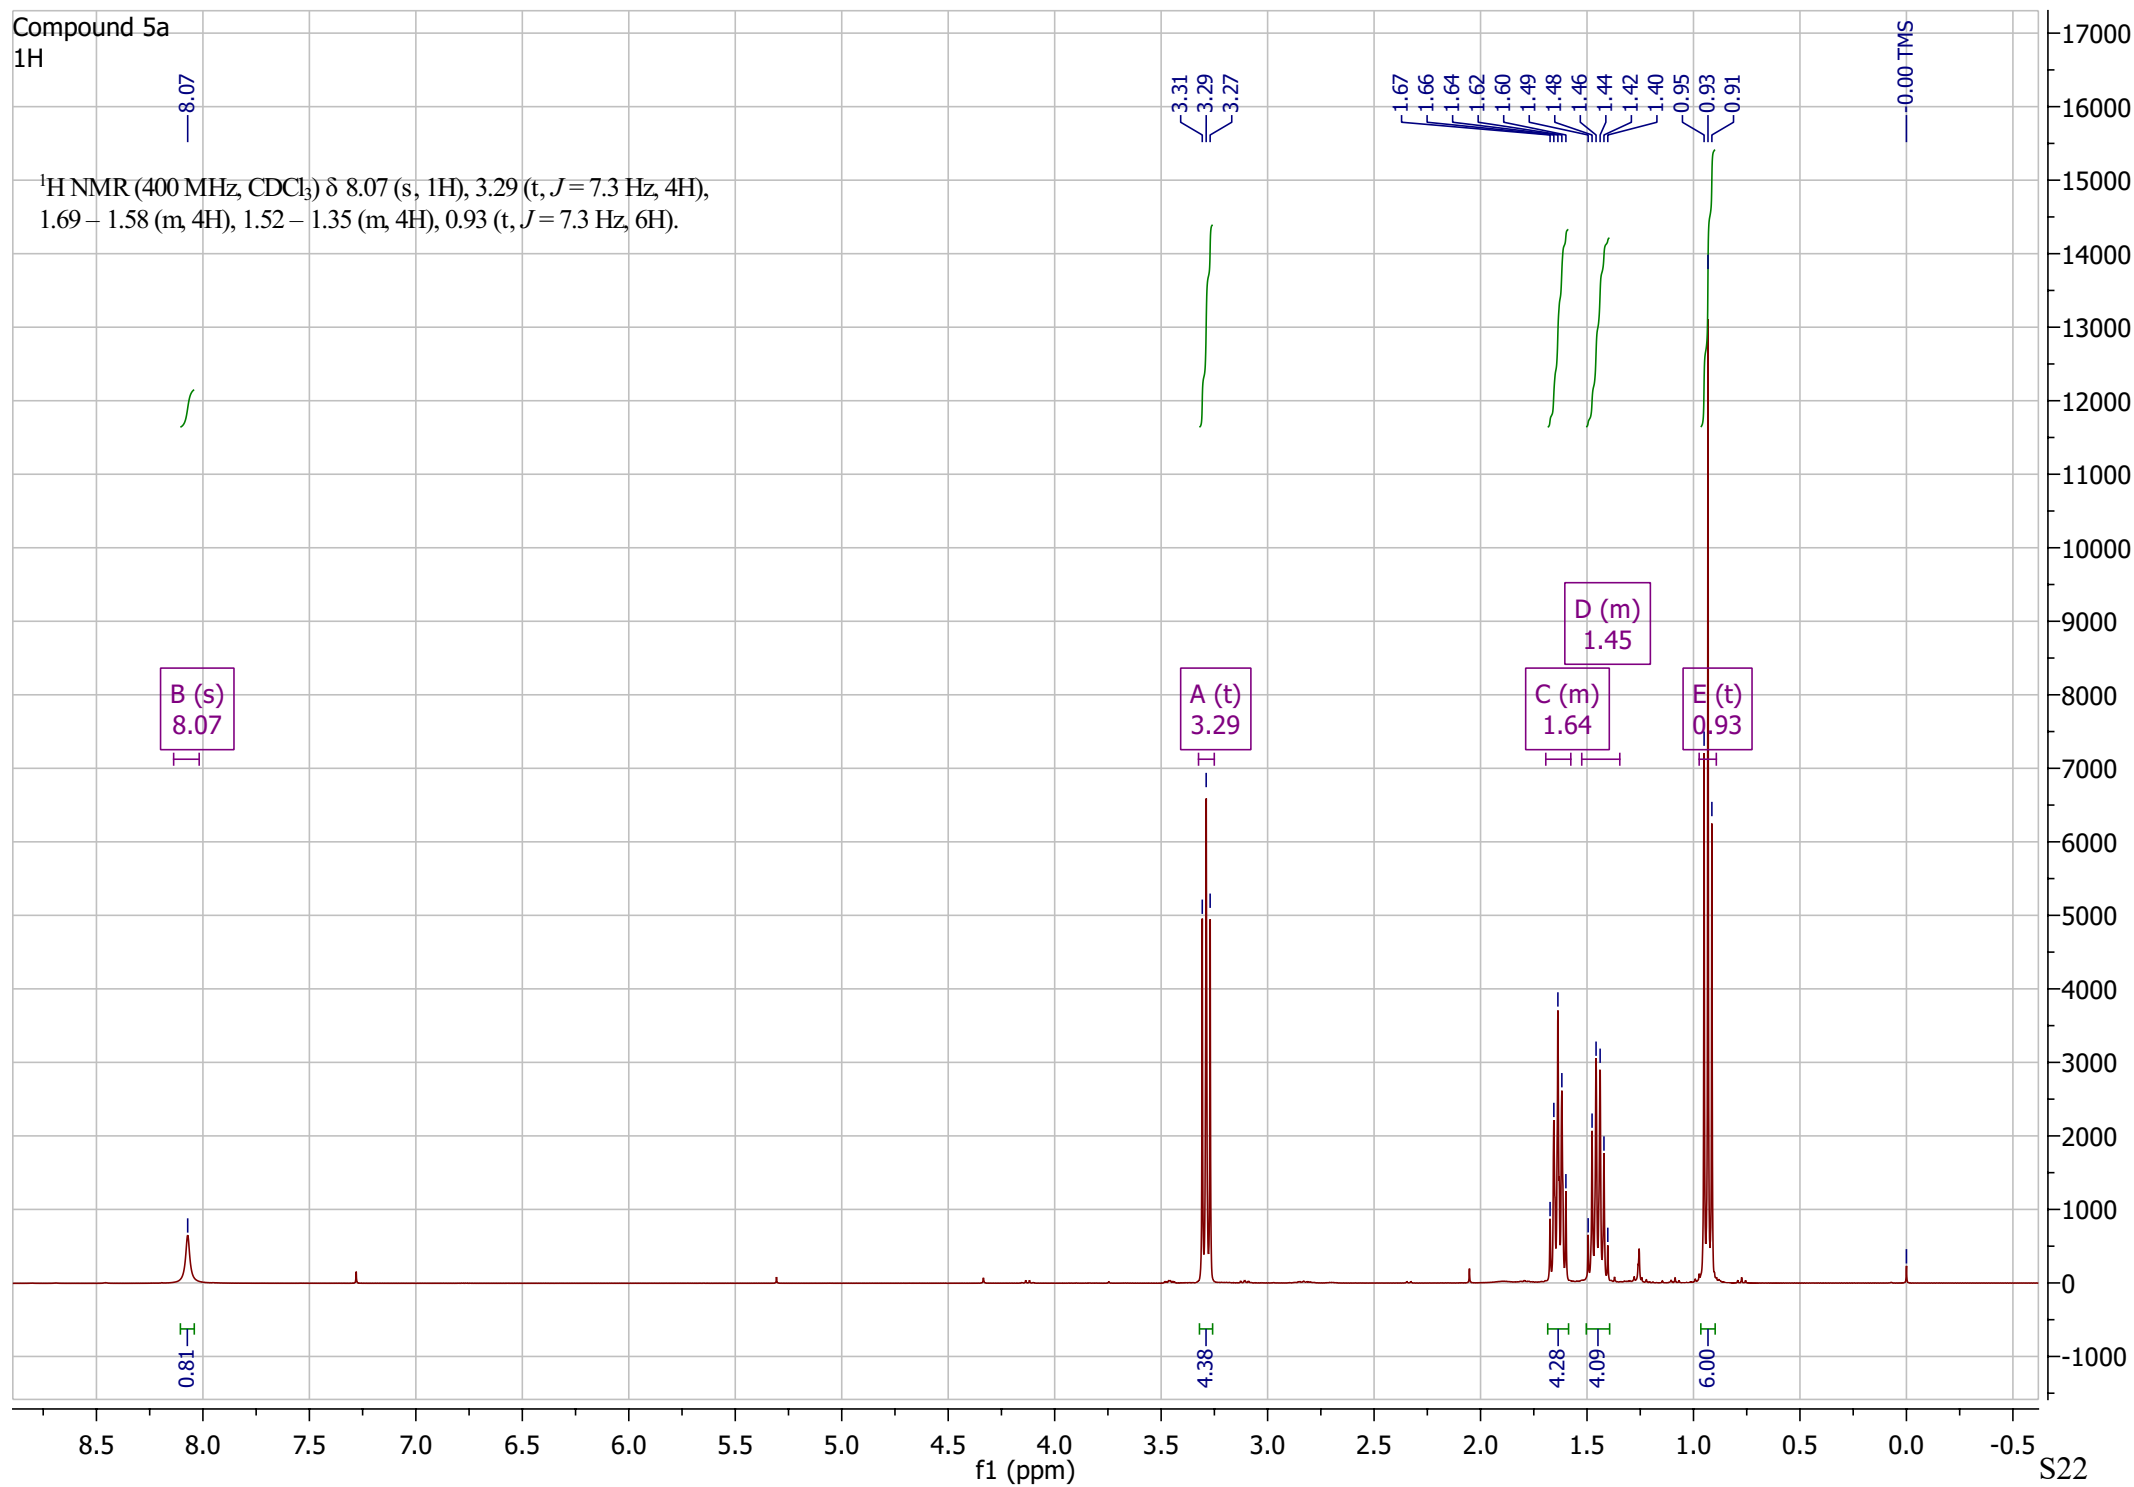

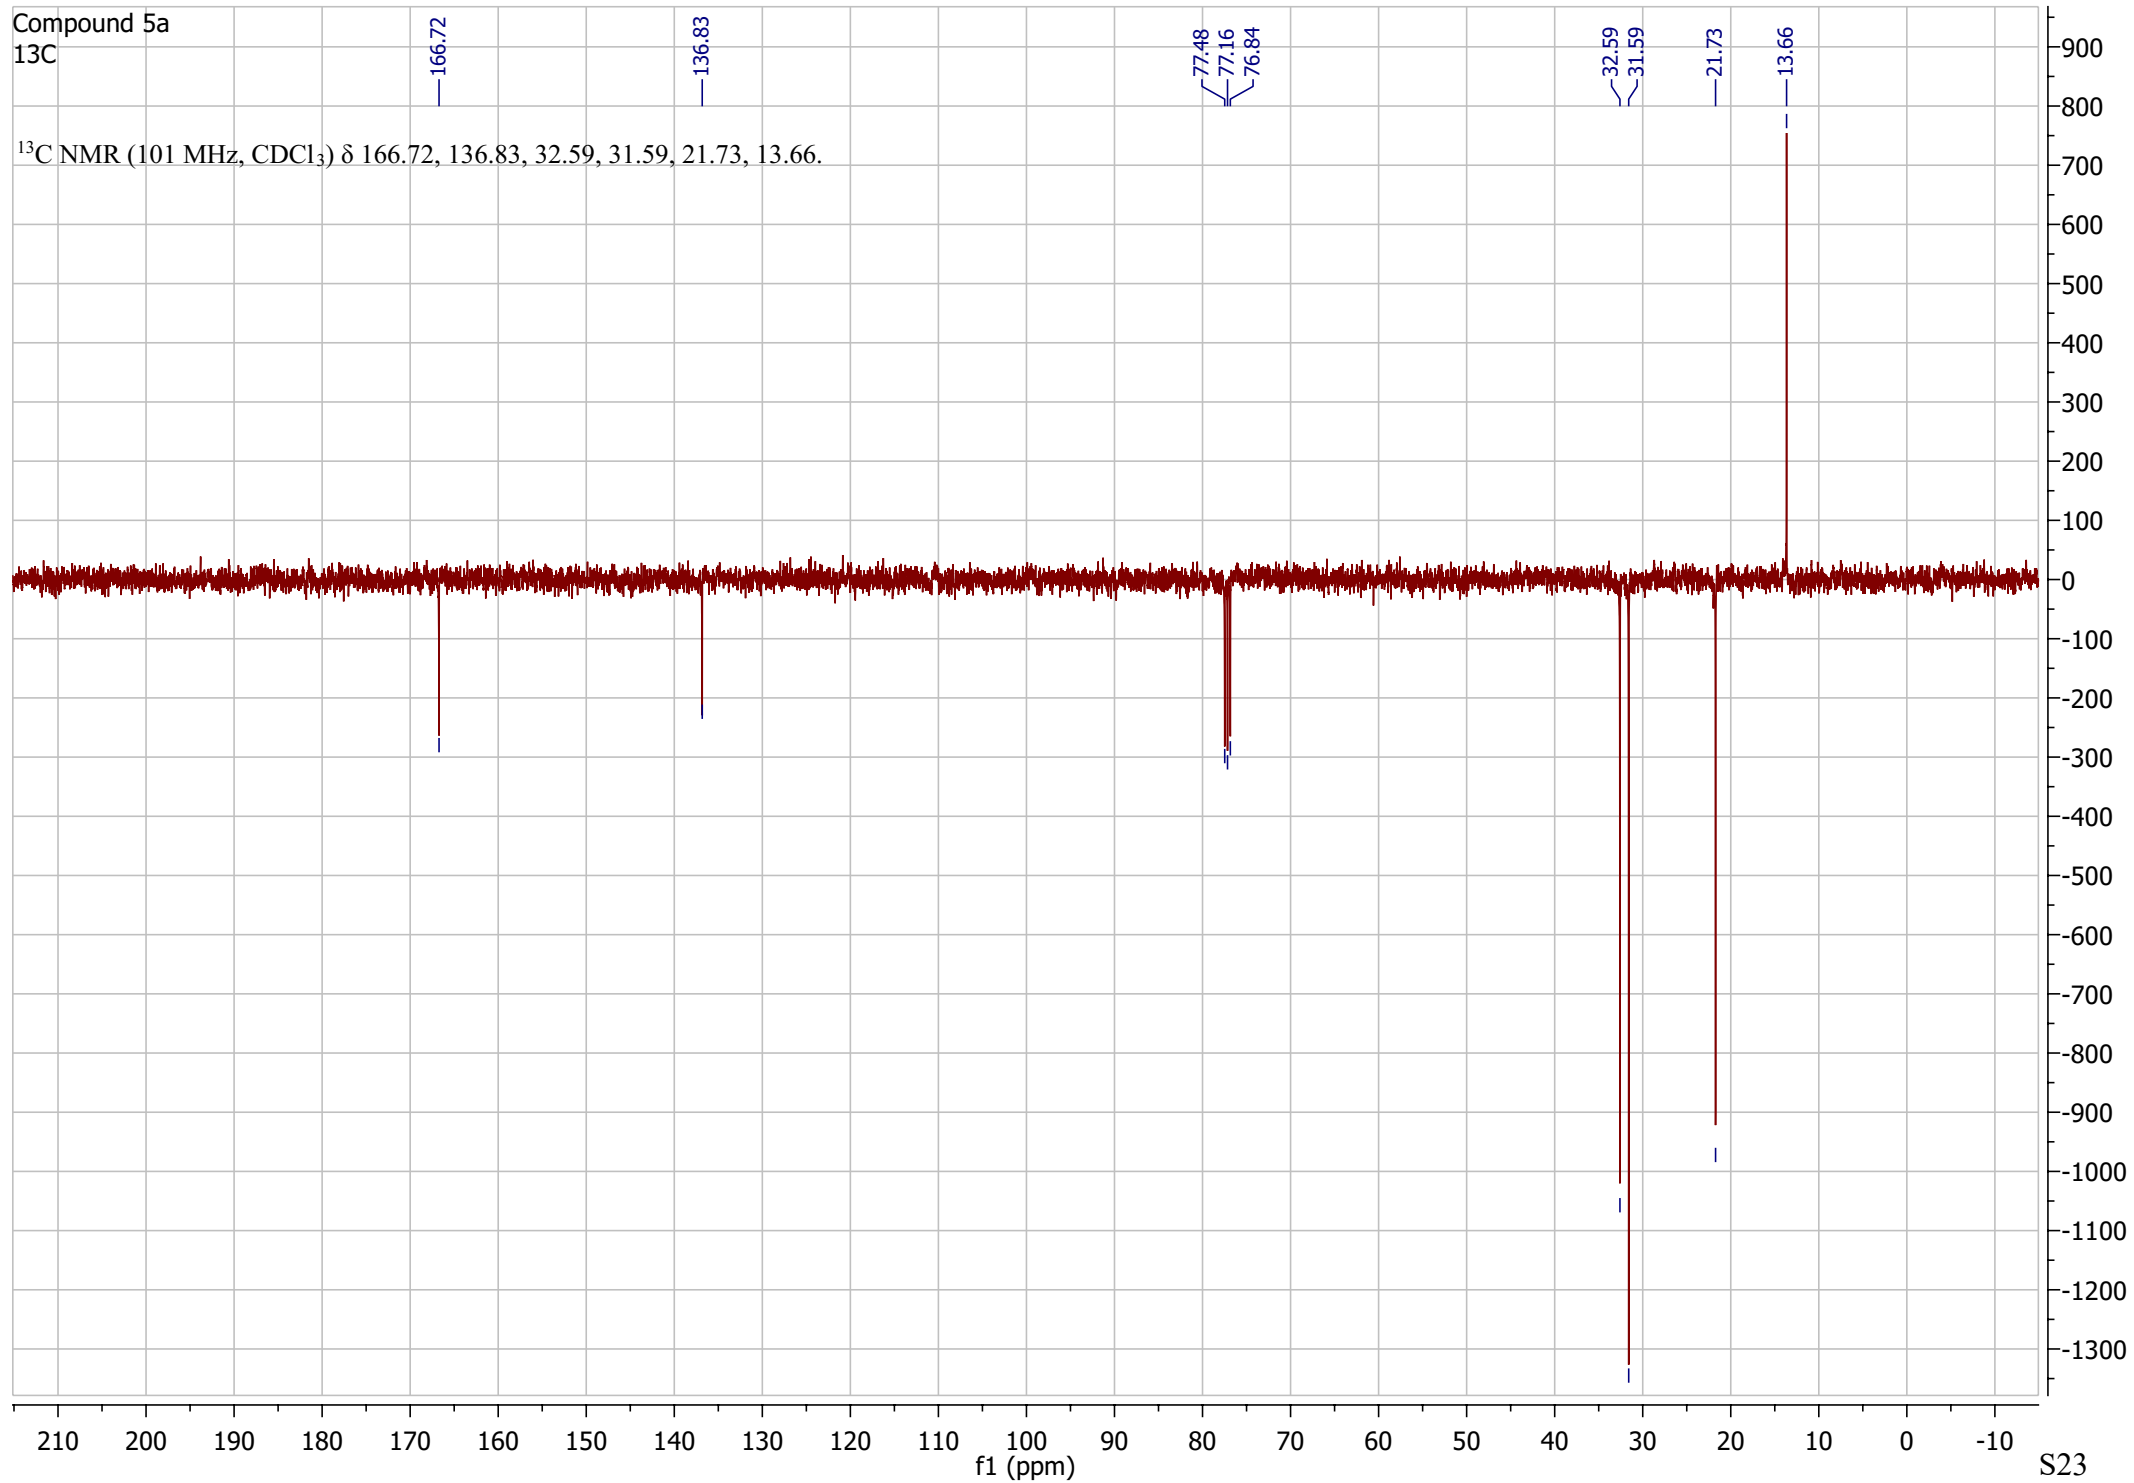

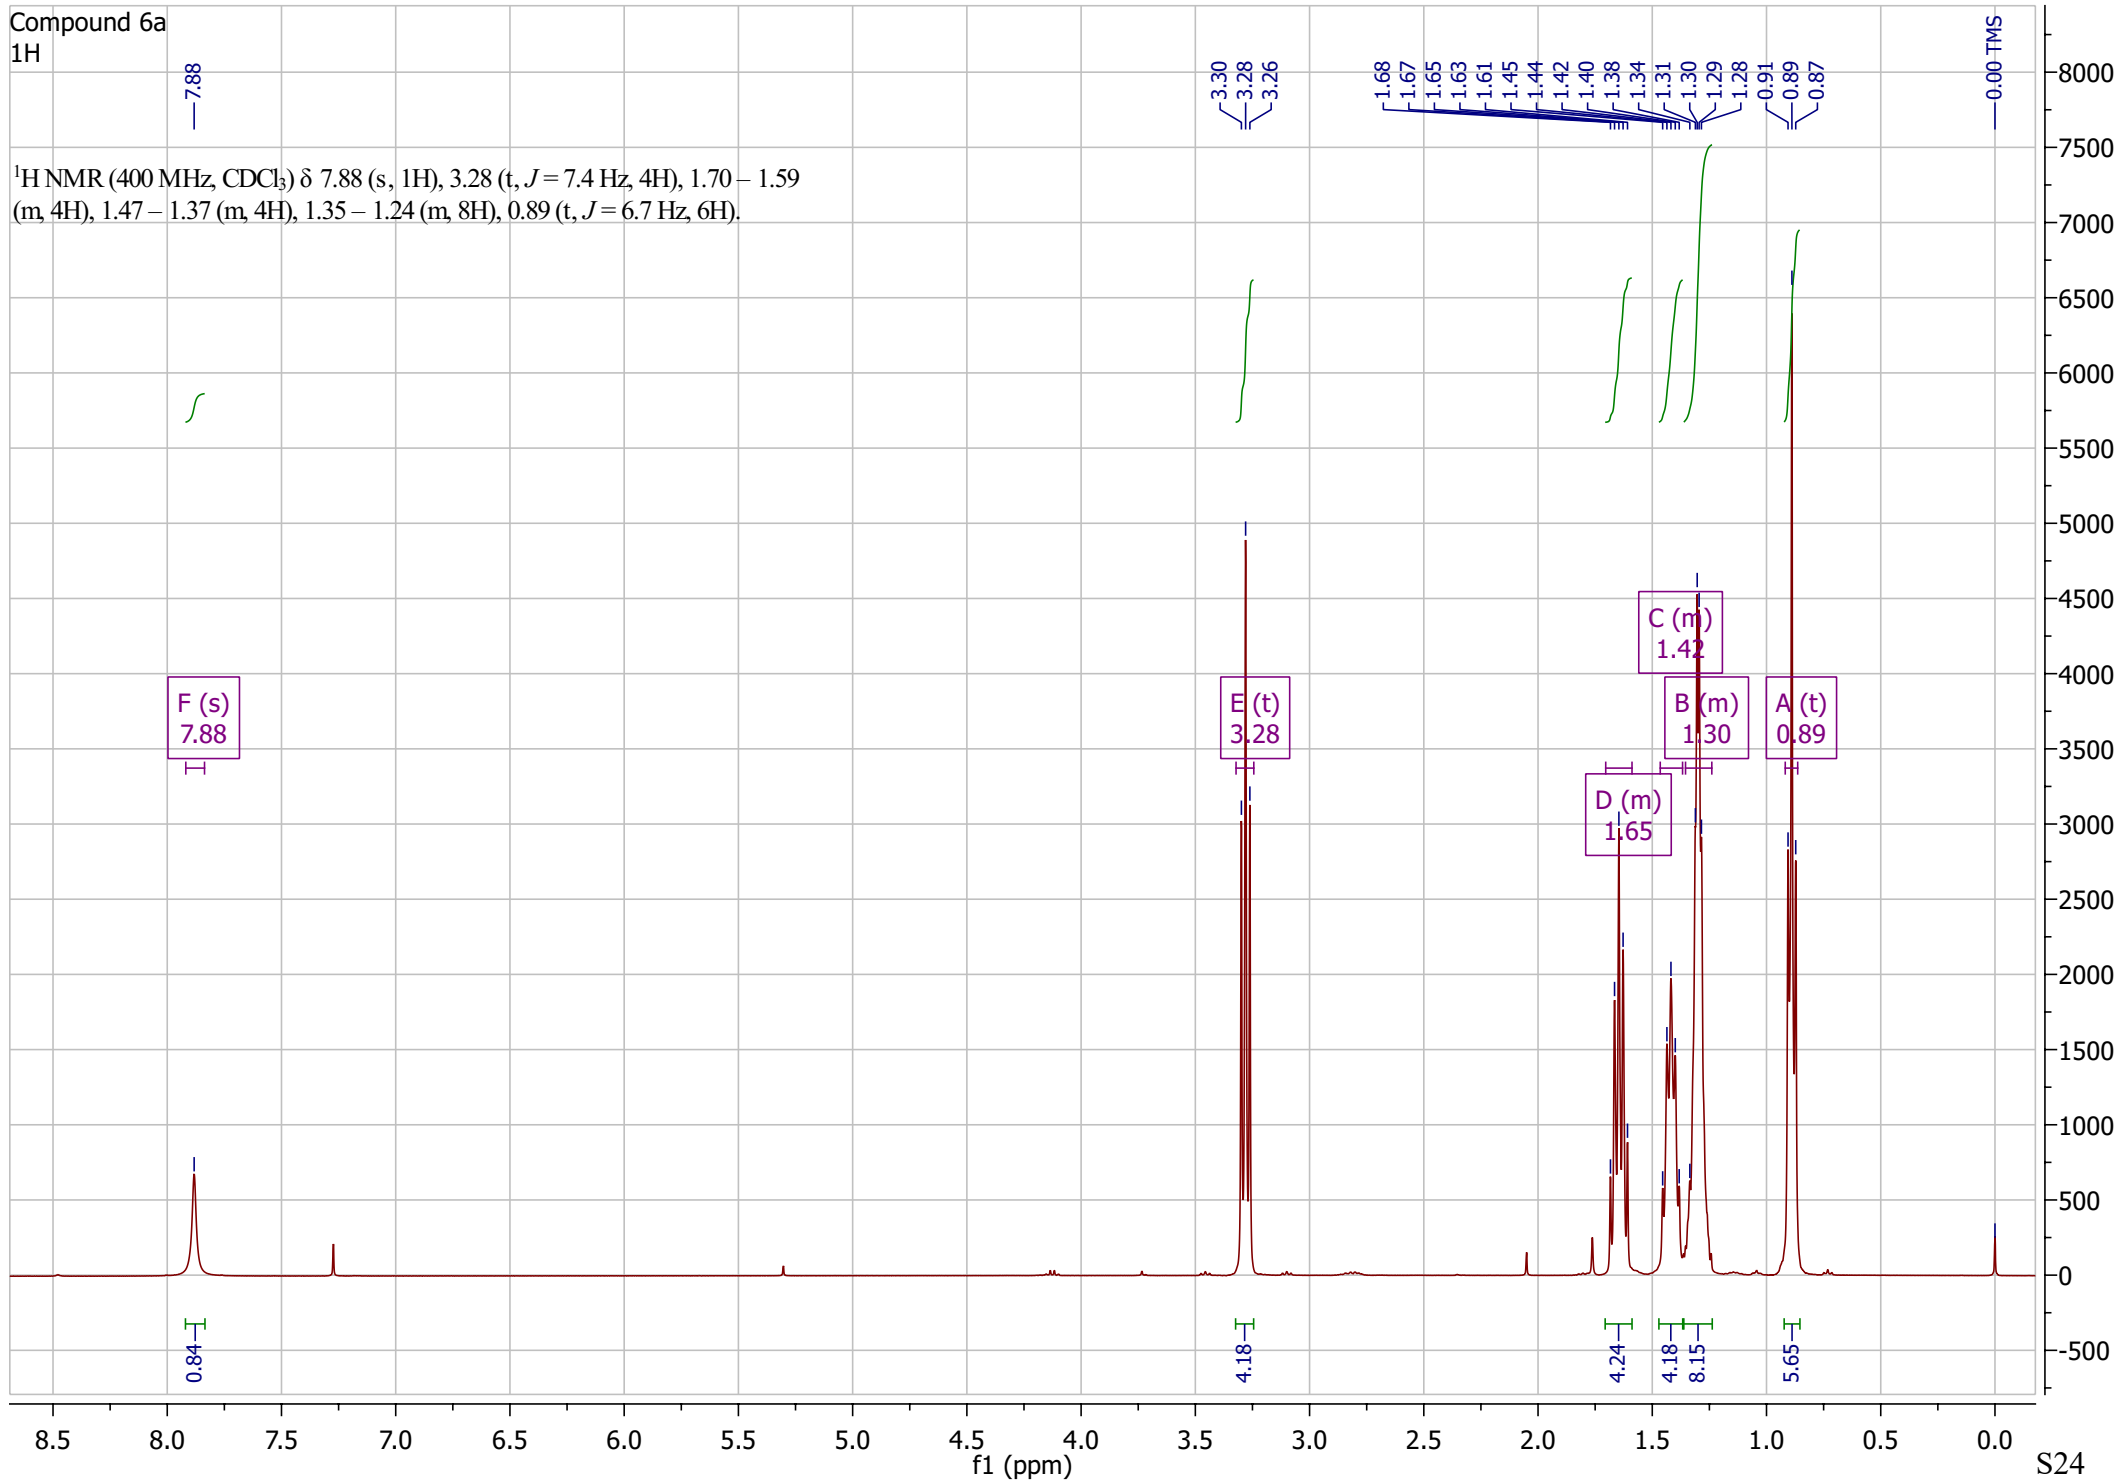

Compound 6a  
13C

$^{13}\text{C}$  NMR (101 MHz,  $\text{CDCl}_3$ )  $\delta$  166.61, 136.84, 31.93, 31.39, 30.55, 28.28, 22.60, 14.10.

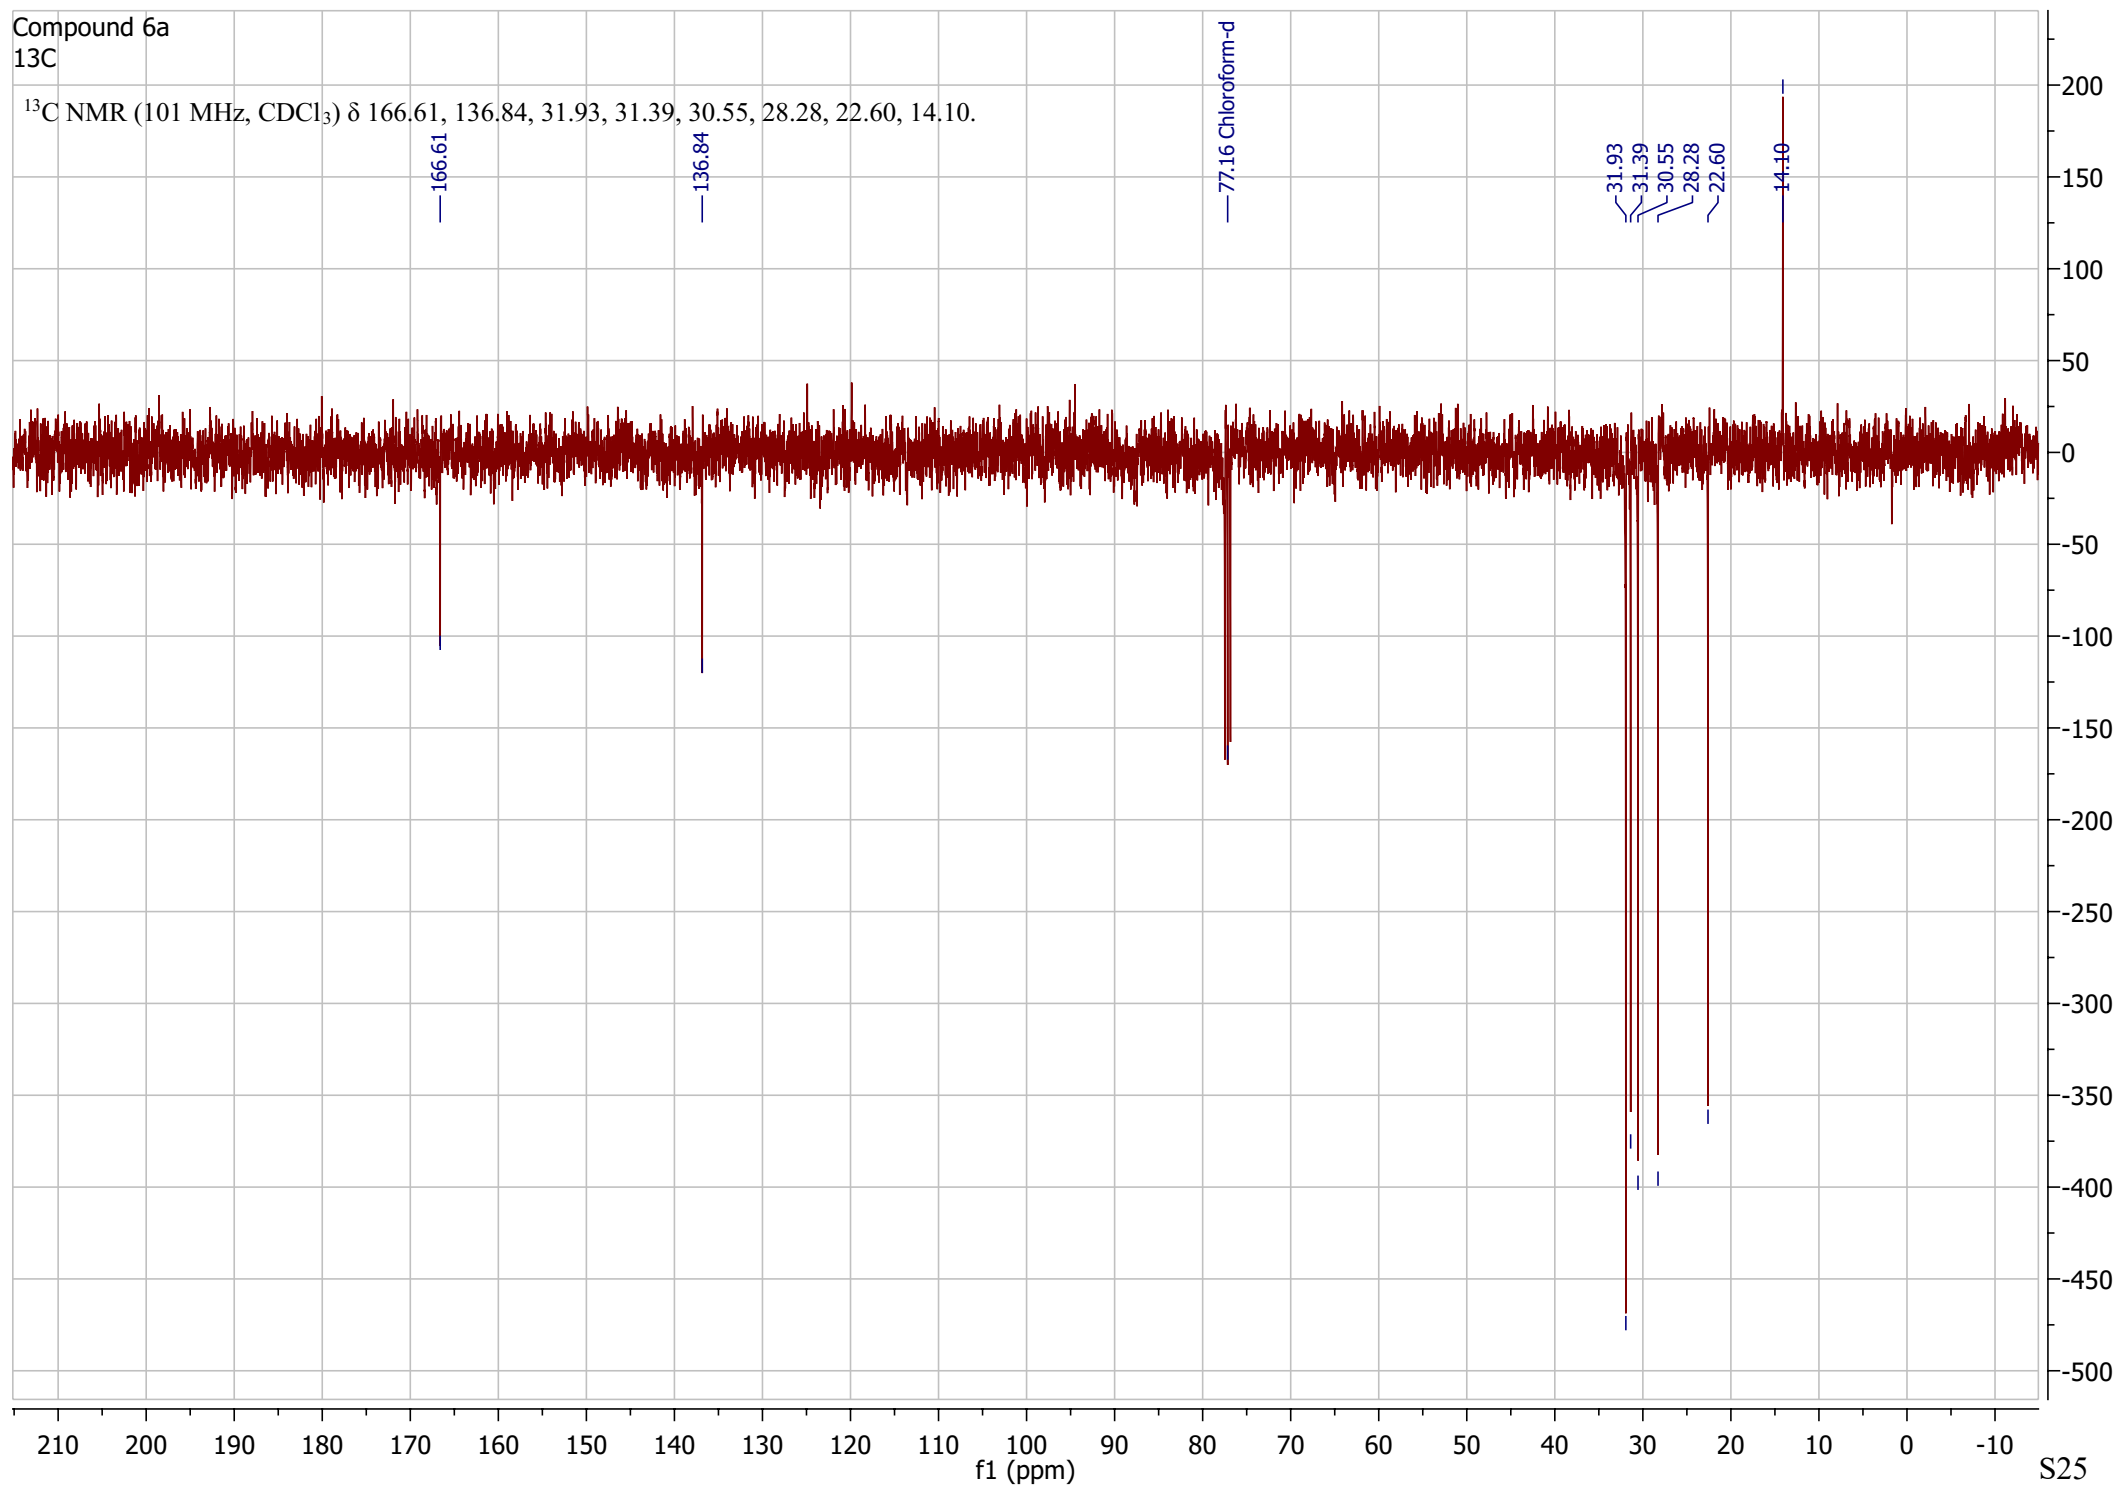

Compound 9a  
1H

$^1\text{H NMR}$  (400 MHz,  $\text{CDCl}_3$ )  $\delta$  7.60 (s, 1H), 3.34 – 3.22 (m, 4H), 1.74 – 1.59 (m, 4H), 1.45 – 1.37 (m, 2H), 1.30 – 1.21 (m, 16H), 1.03 (t,  $J = 7.4$  Hz, 3H), 0.88 (t,  $J = 6.8$  Hz, 3H).

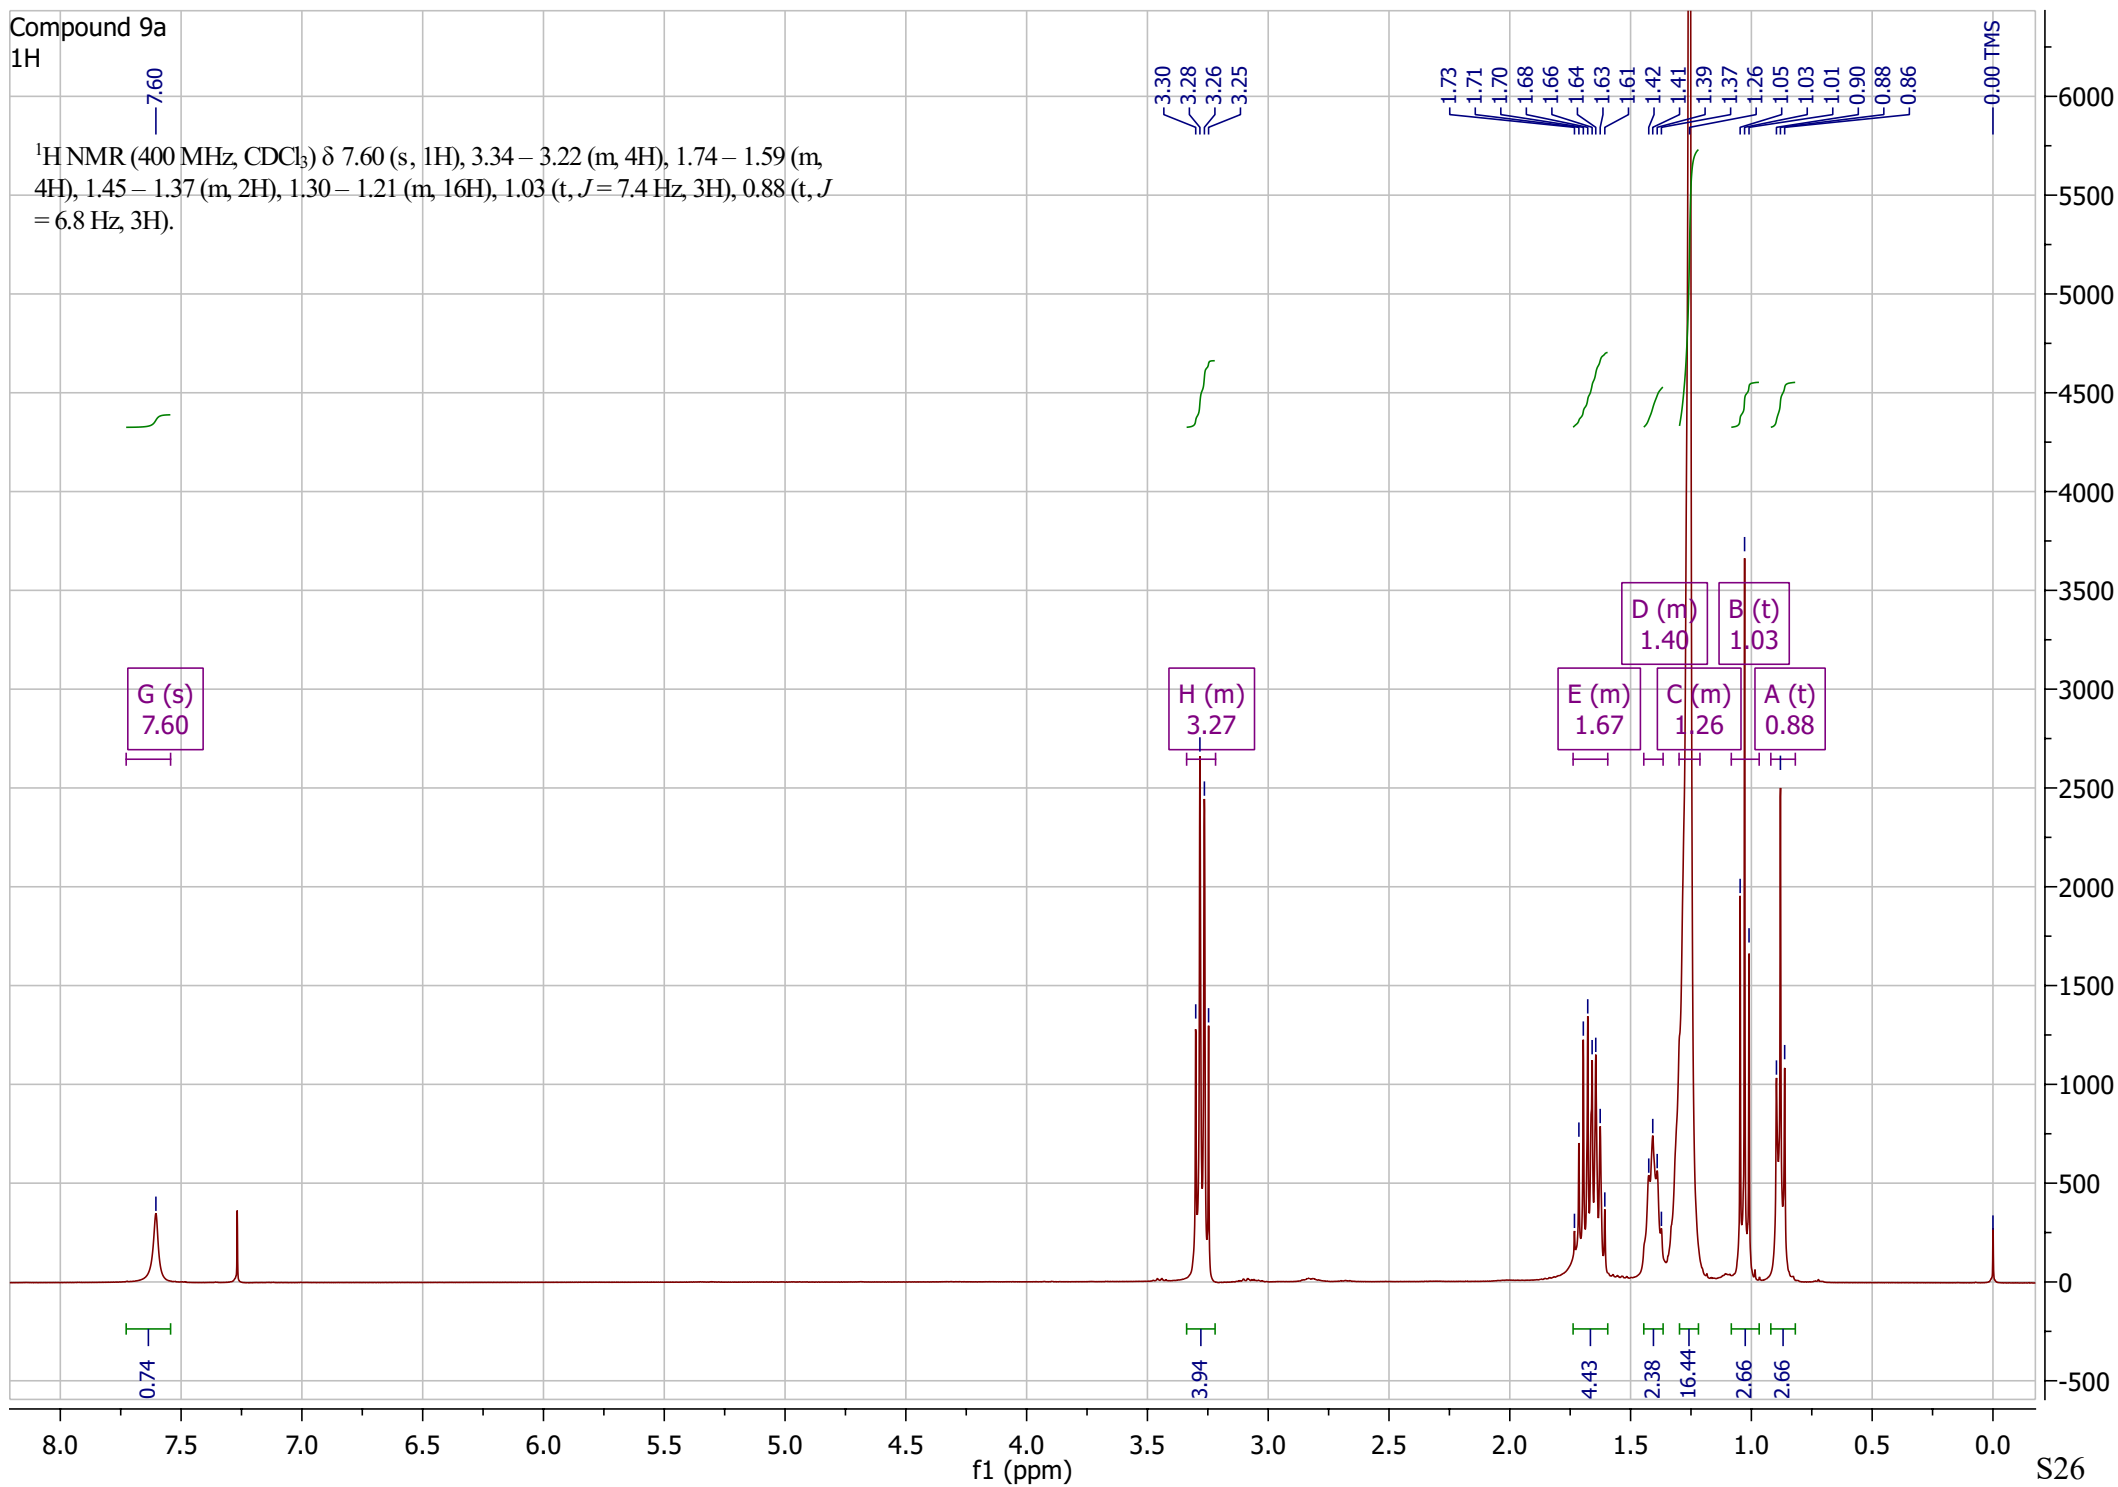

Compound 9a  
13C

$^{13}\text{C}$  NMR (101 MHz,  $\text{CDCl}_3$ )  $\delta$  166.61, 166.40, 136.98, 136.71, 33.79, 32.04, 31.95, 30.59, 29.76, 29.69, 29.60, 29.48, 29.24, 28.62, 24.03, 22.82, 14.26, 13.23.

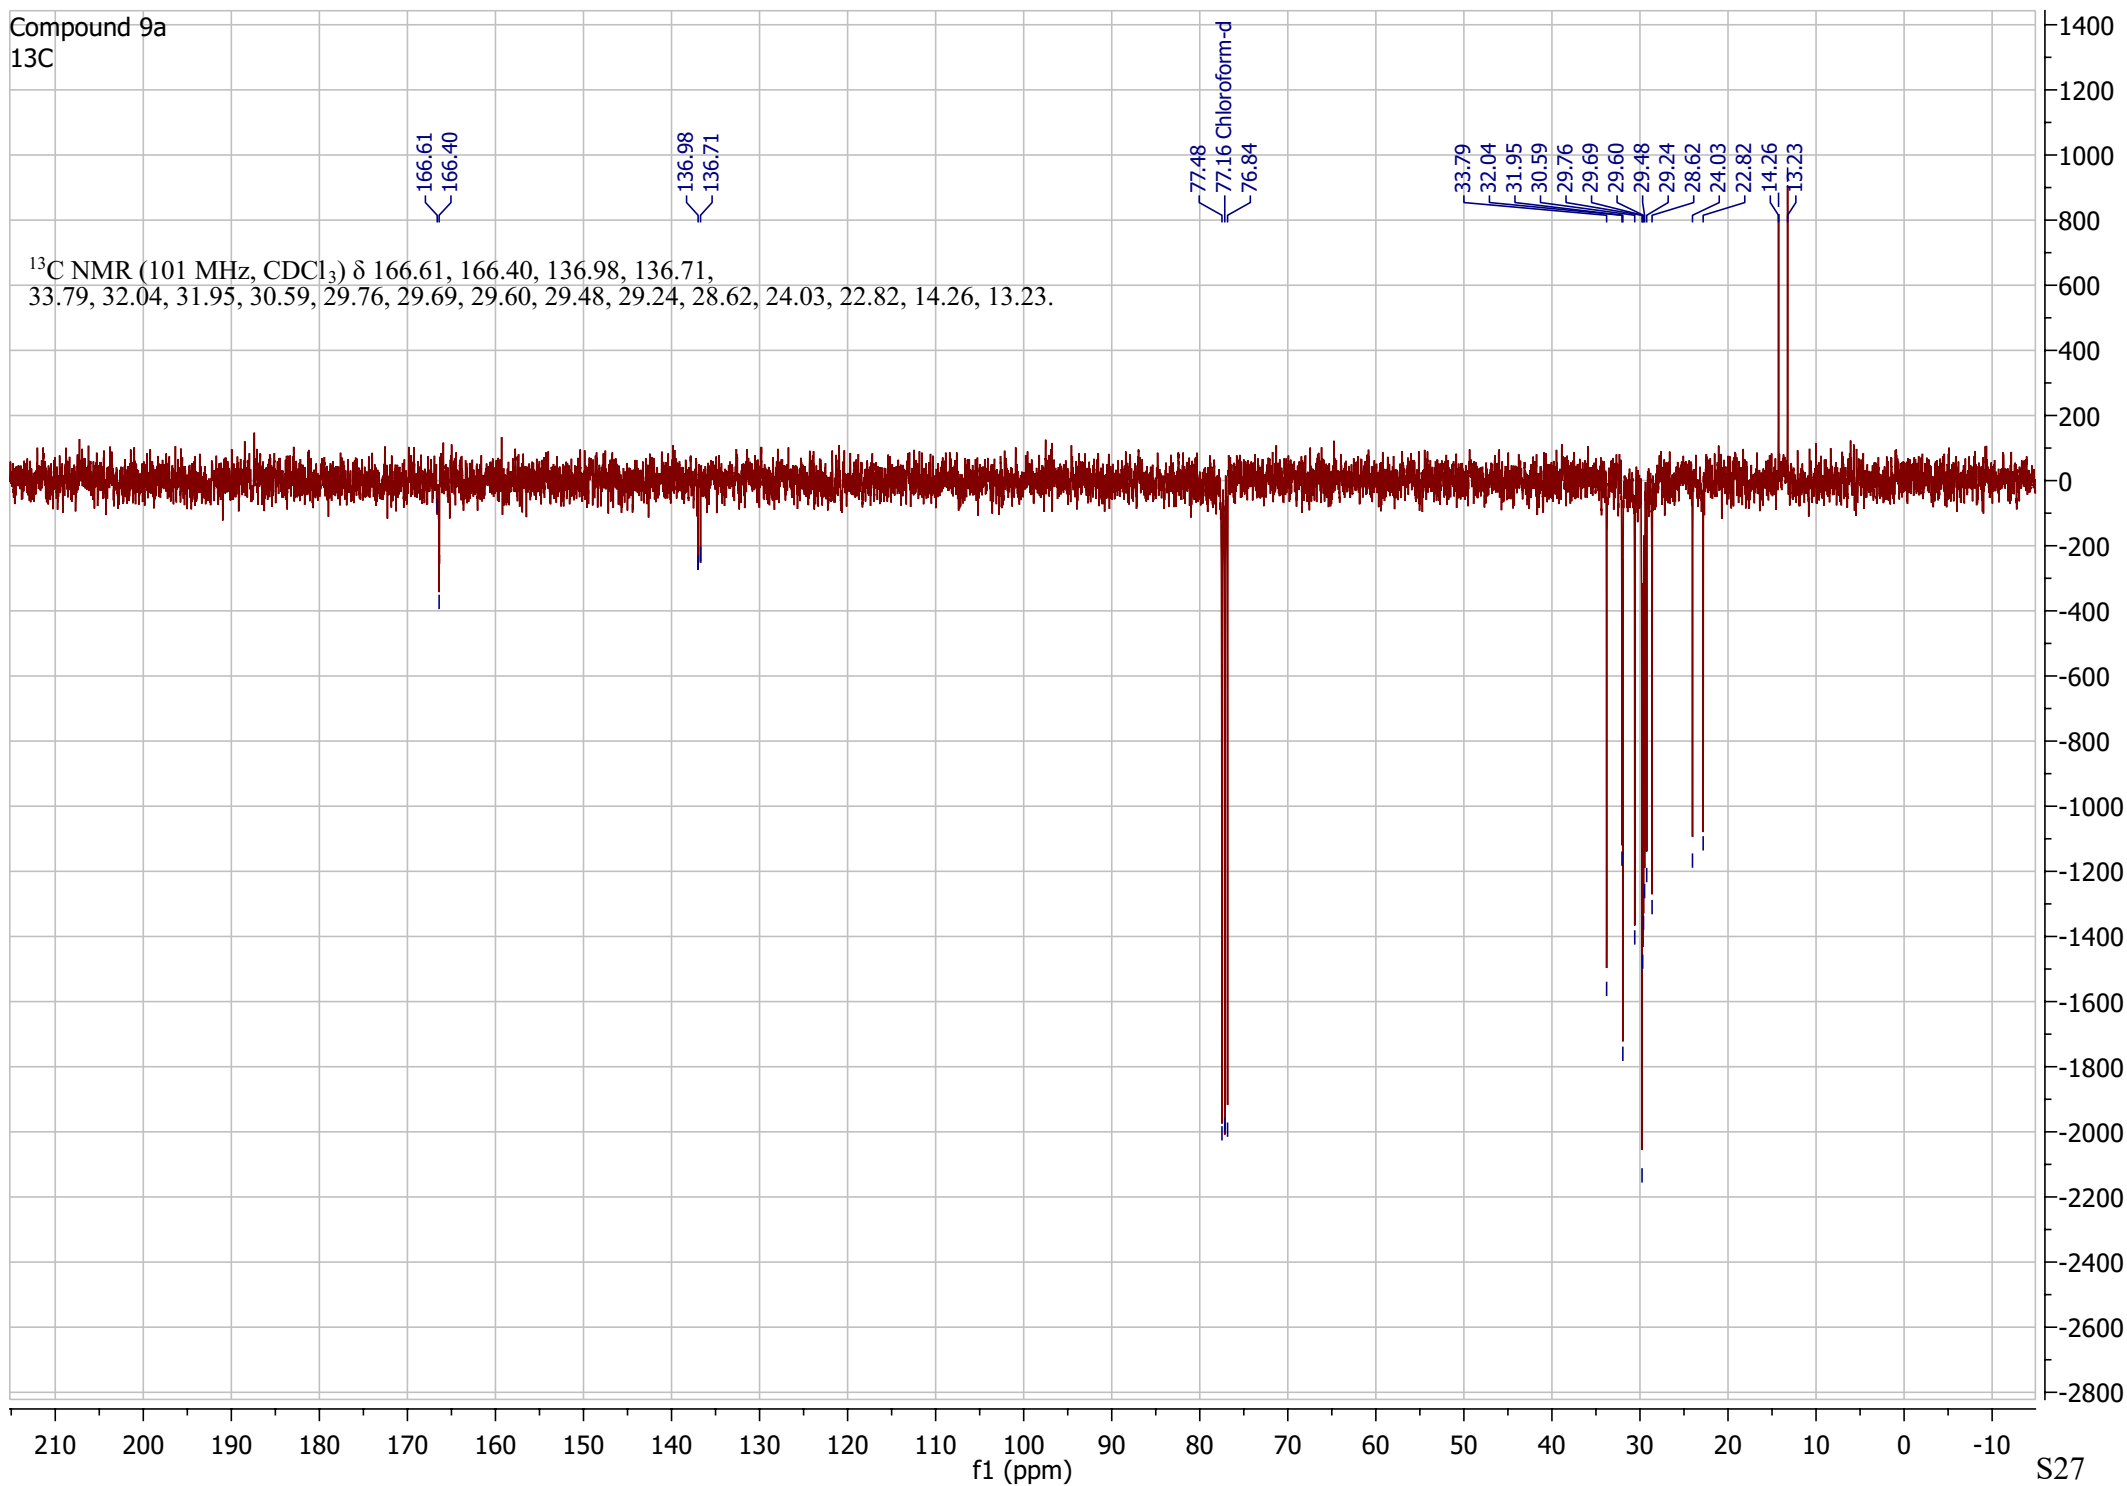

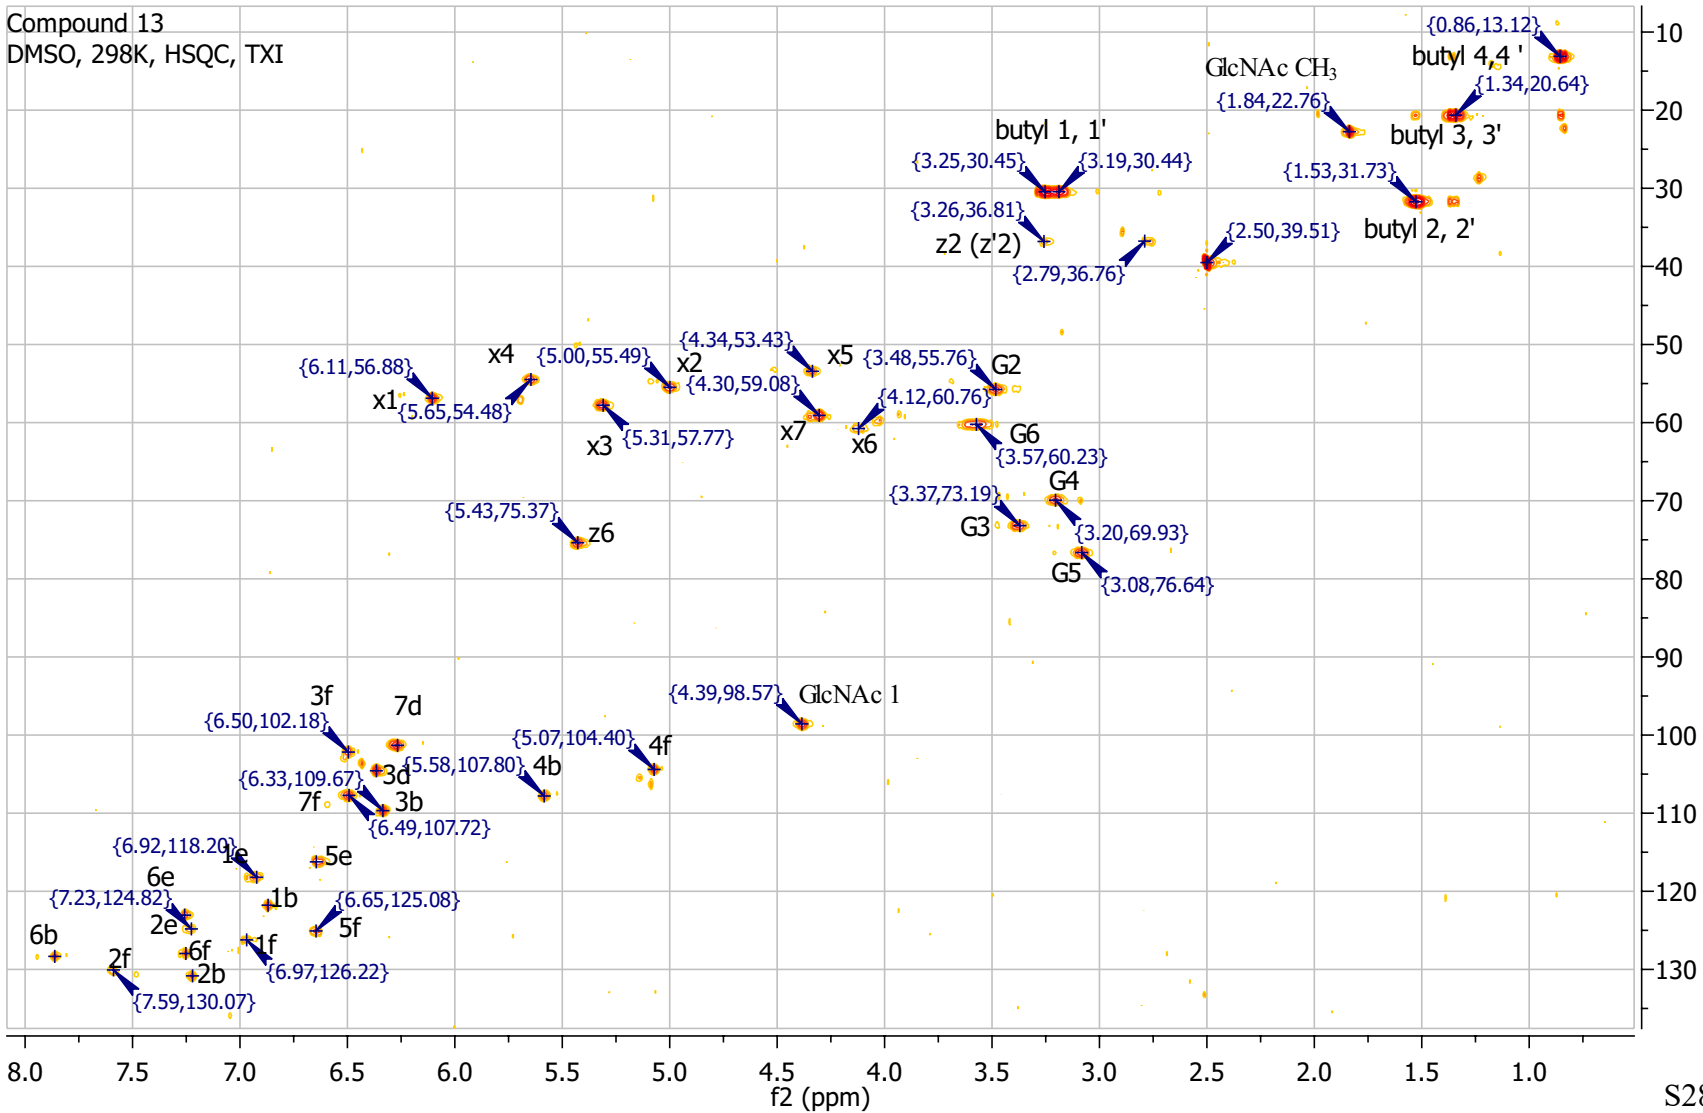



Compound 1a  
DMSO, 298K, <sup>13</sup>C, TXI

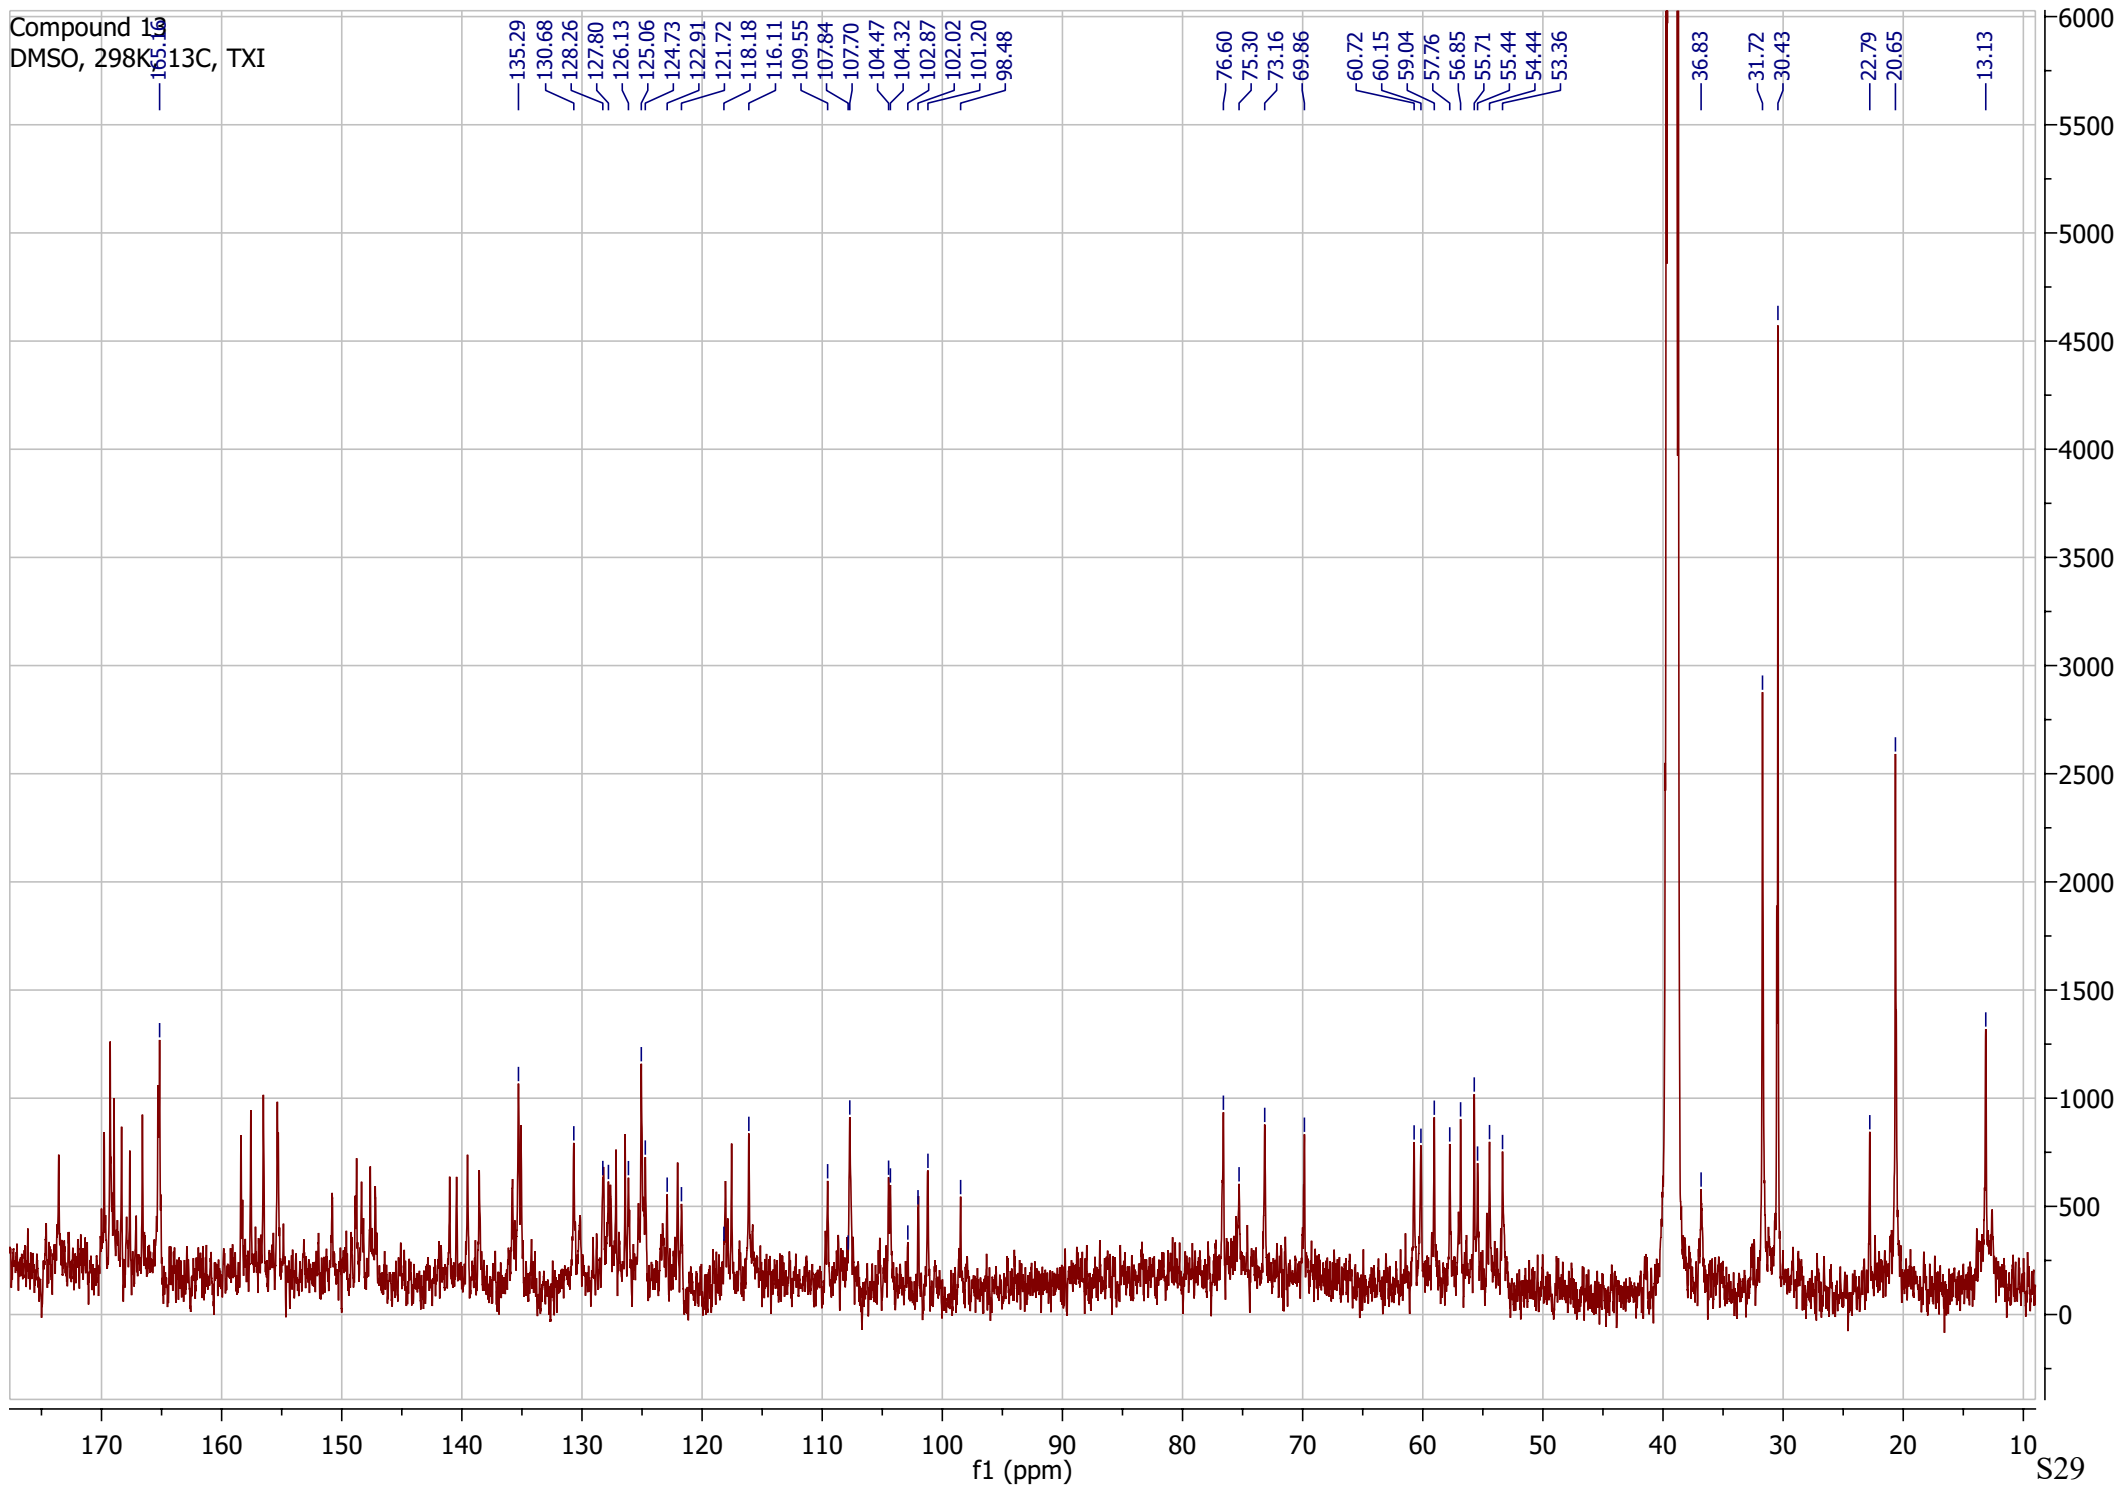

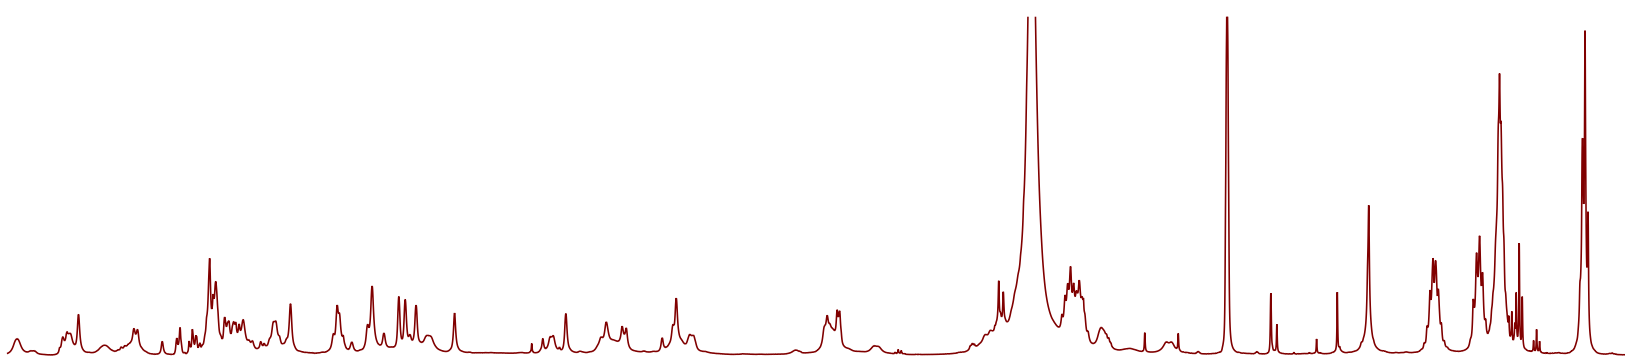

Compound 14  
DMSO, 298K, HSQC, TXI

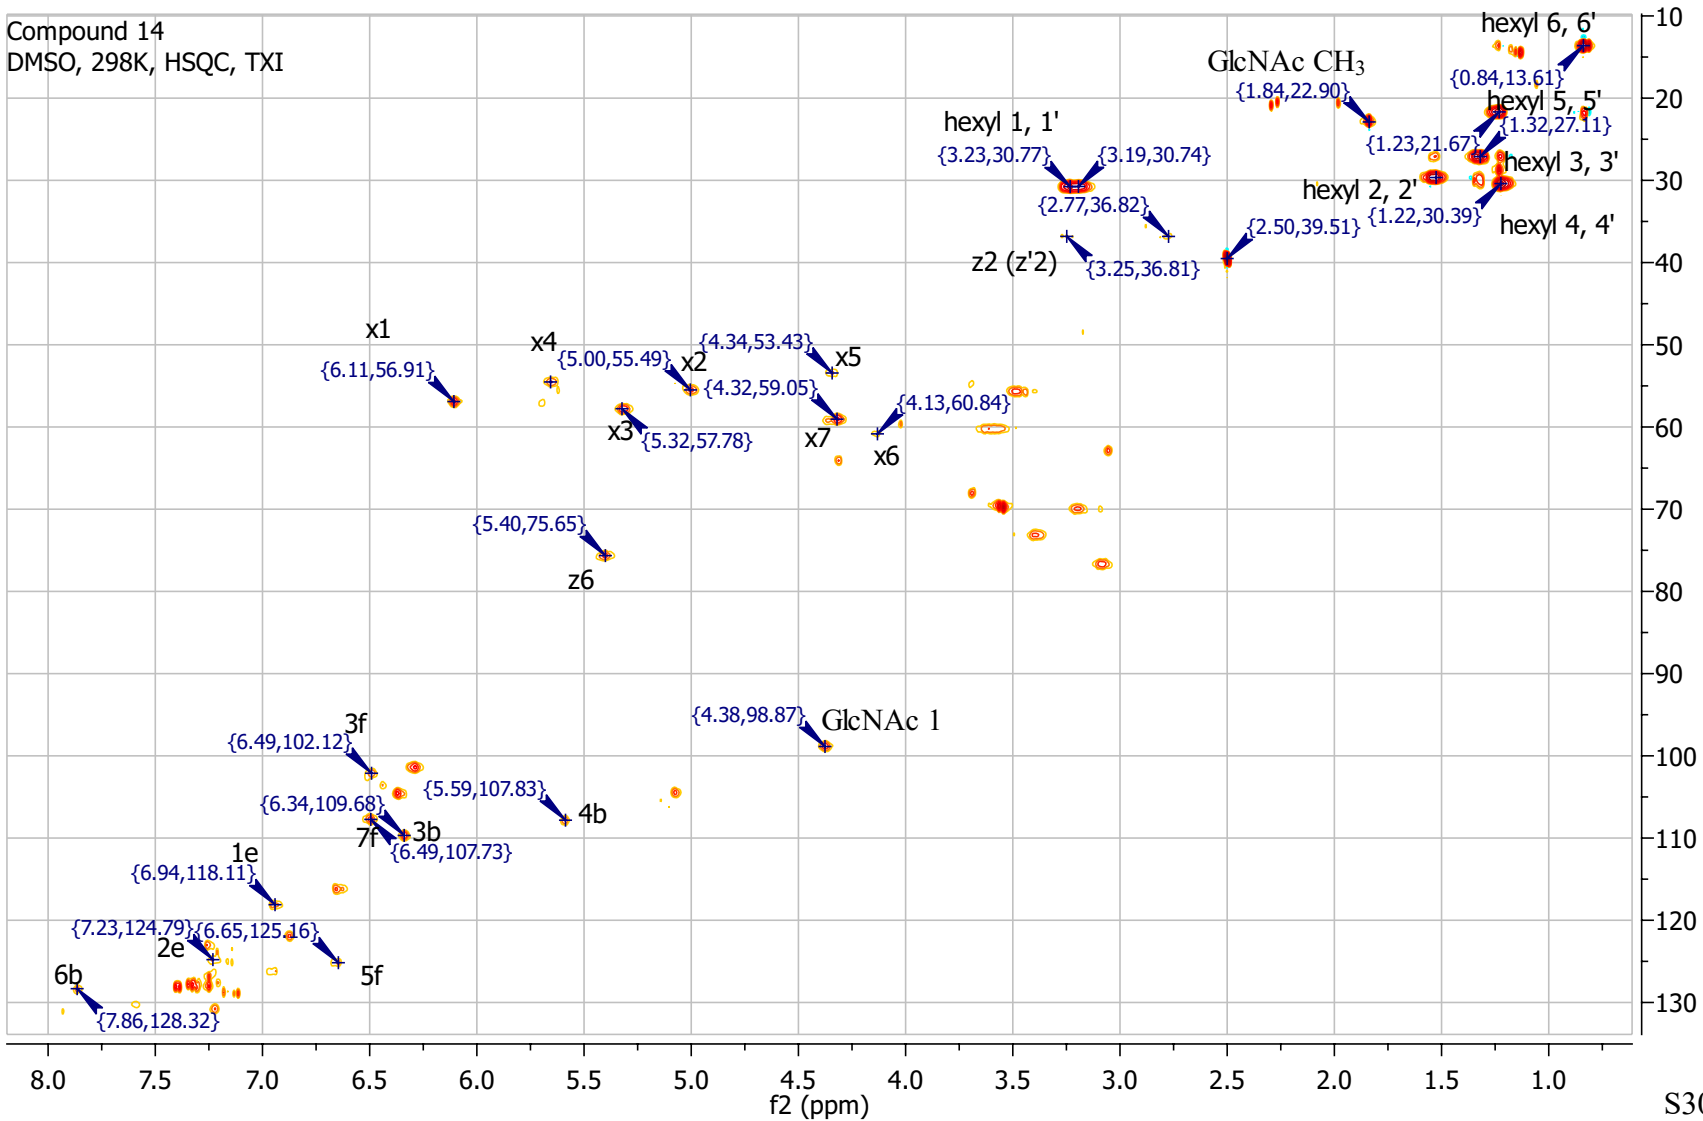

f1 (ppm)

f2 (ppm)

S30

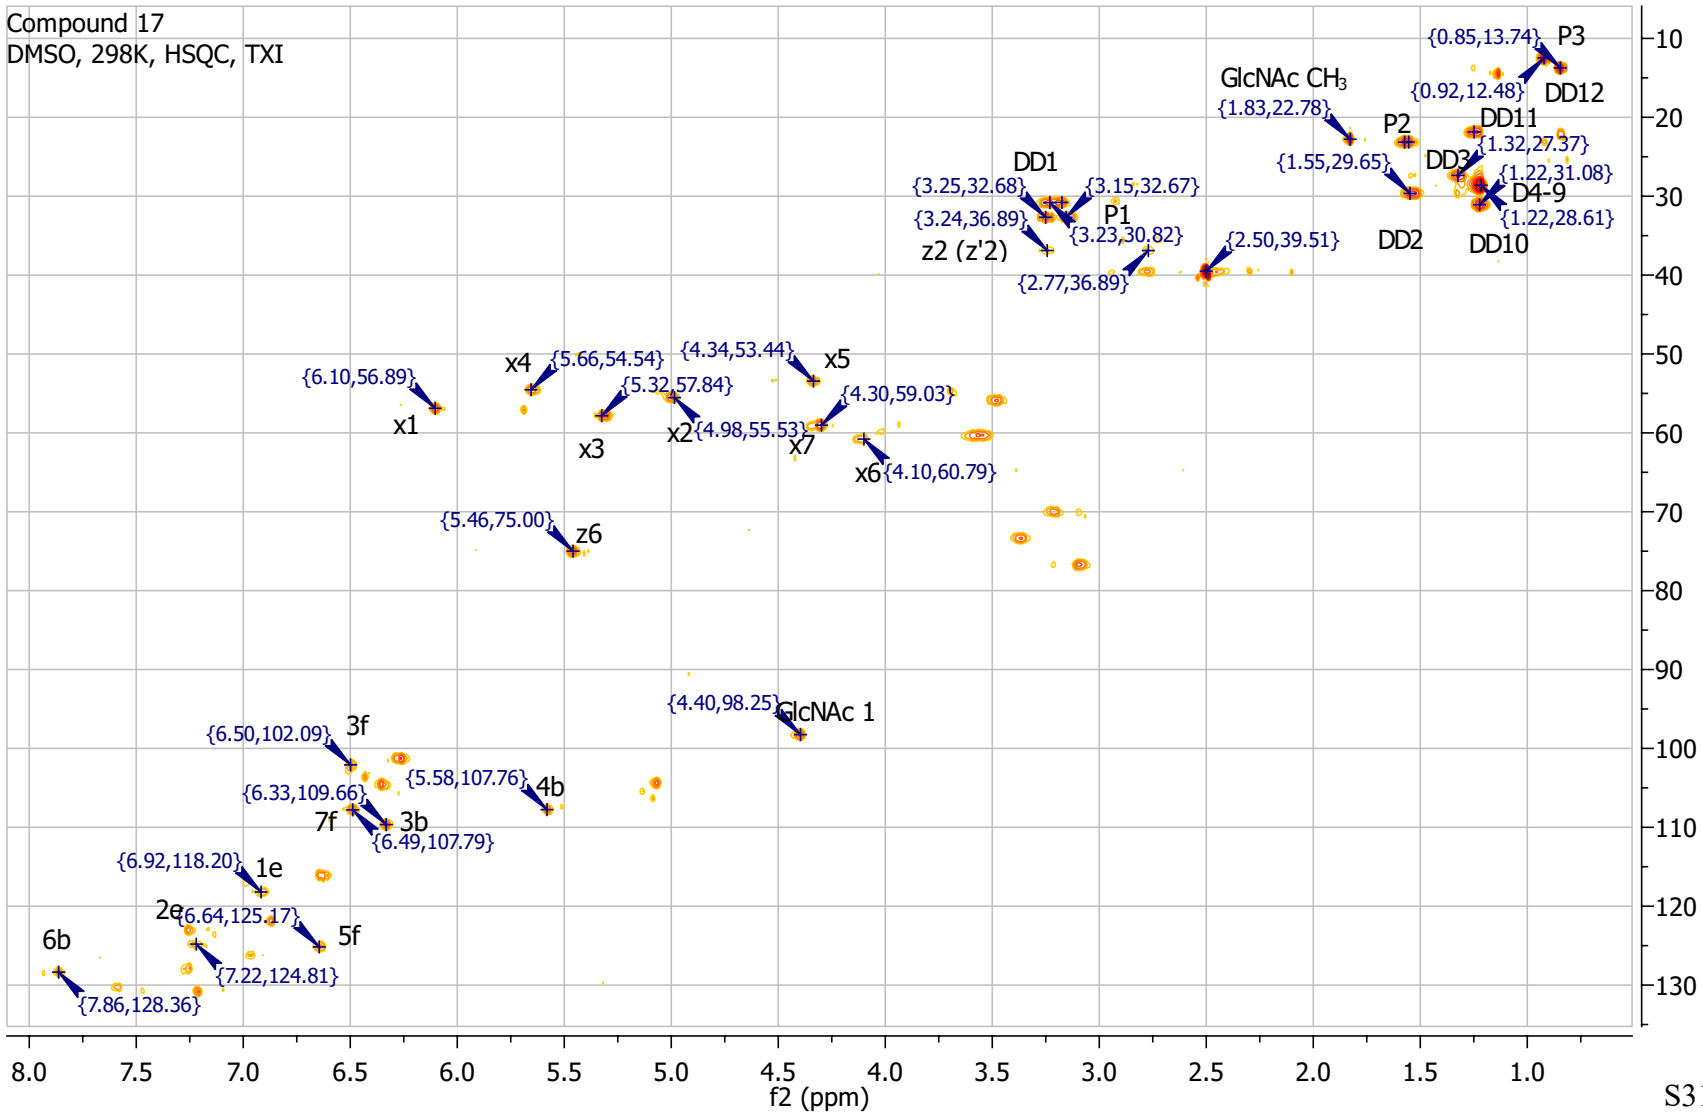

Compound 19  
1H

$^1\text{H}$  NMR (360 MHz, Chloroform-*d*)  $\delta$  4.27 (d,  $J=2.5$  Hz, 2H), 3.38 – 3.16 (m, 4H), 2.23 (t,  $J=2.5$  Hz, 1H), 1.80 – 1.60 (m, 4H), 1.03 (t,  $J=7.3$  Hz, 6H).

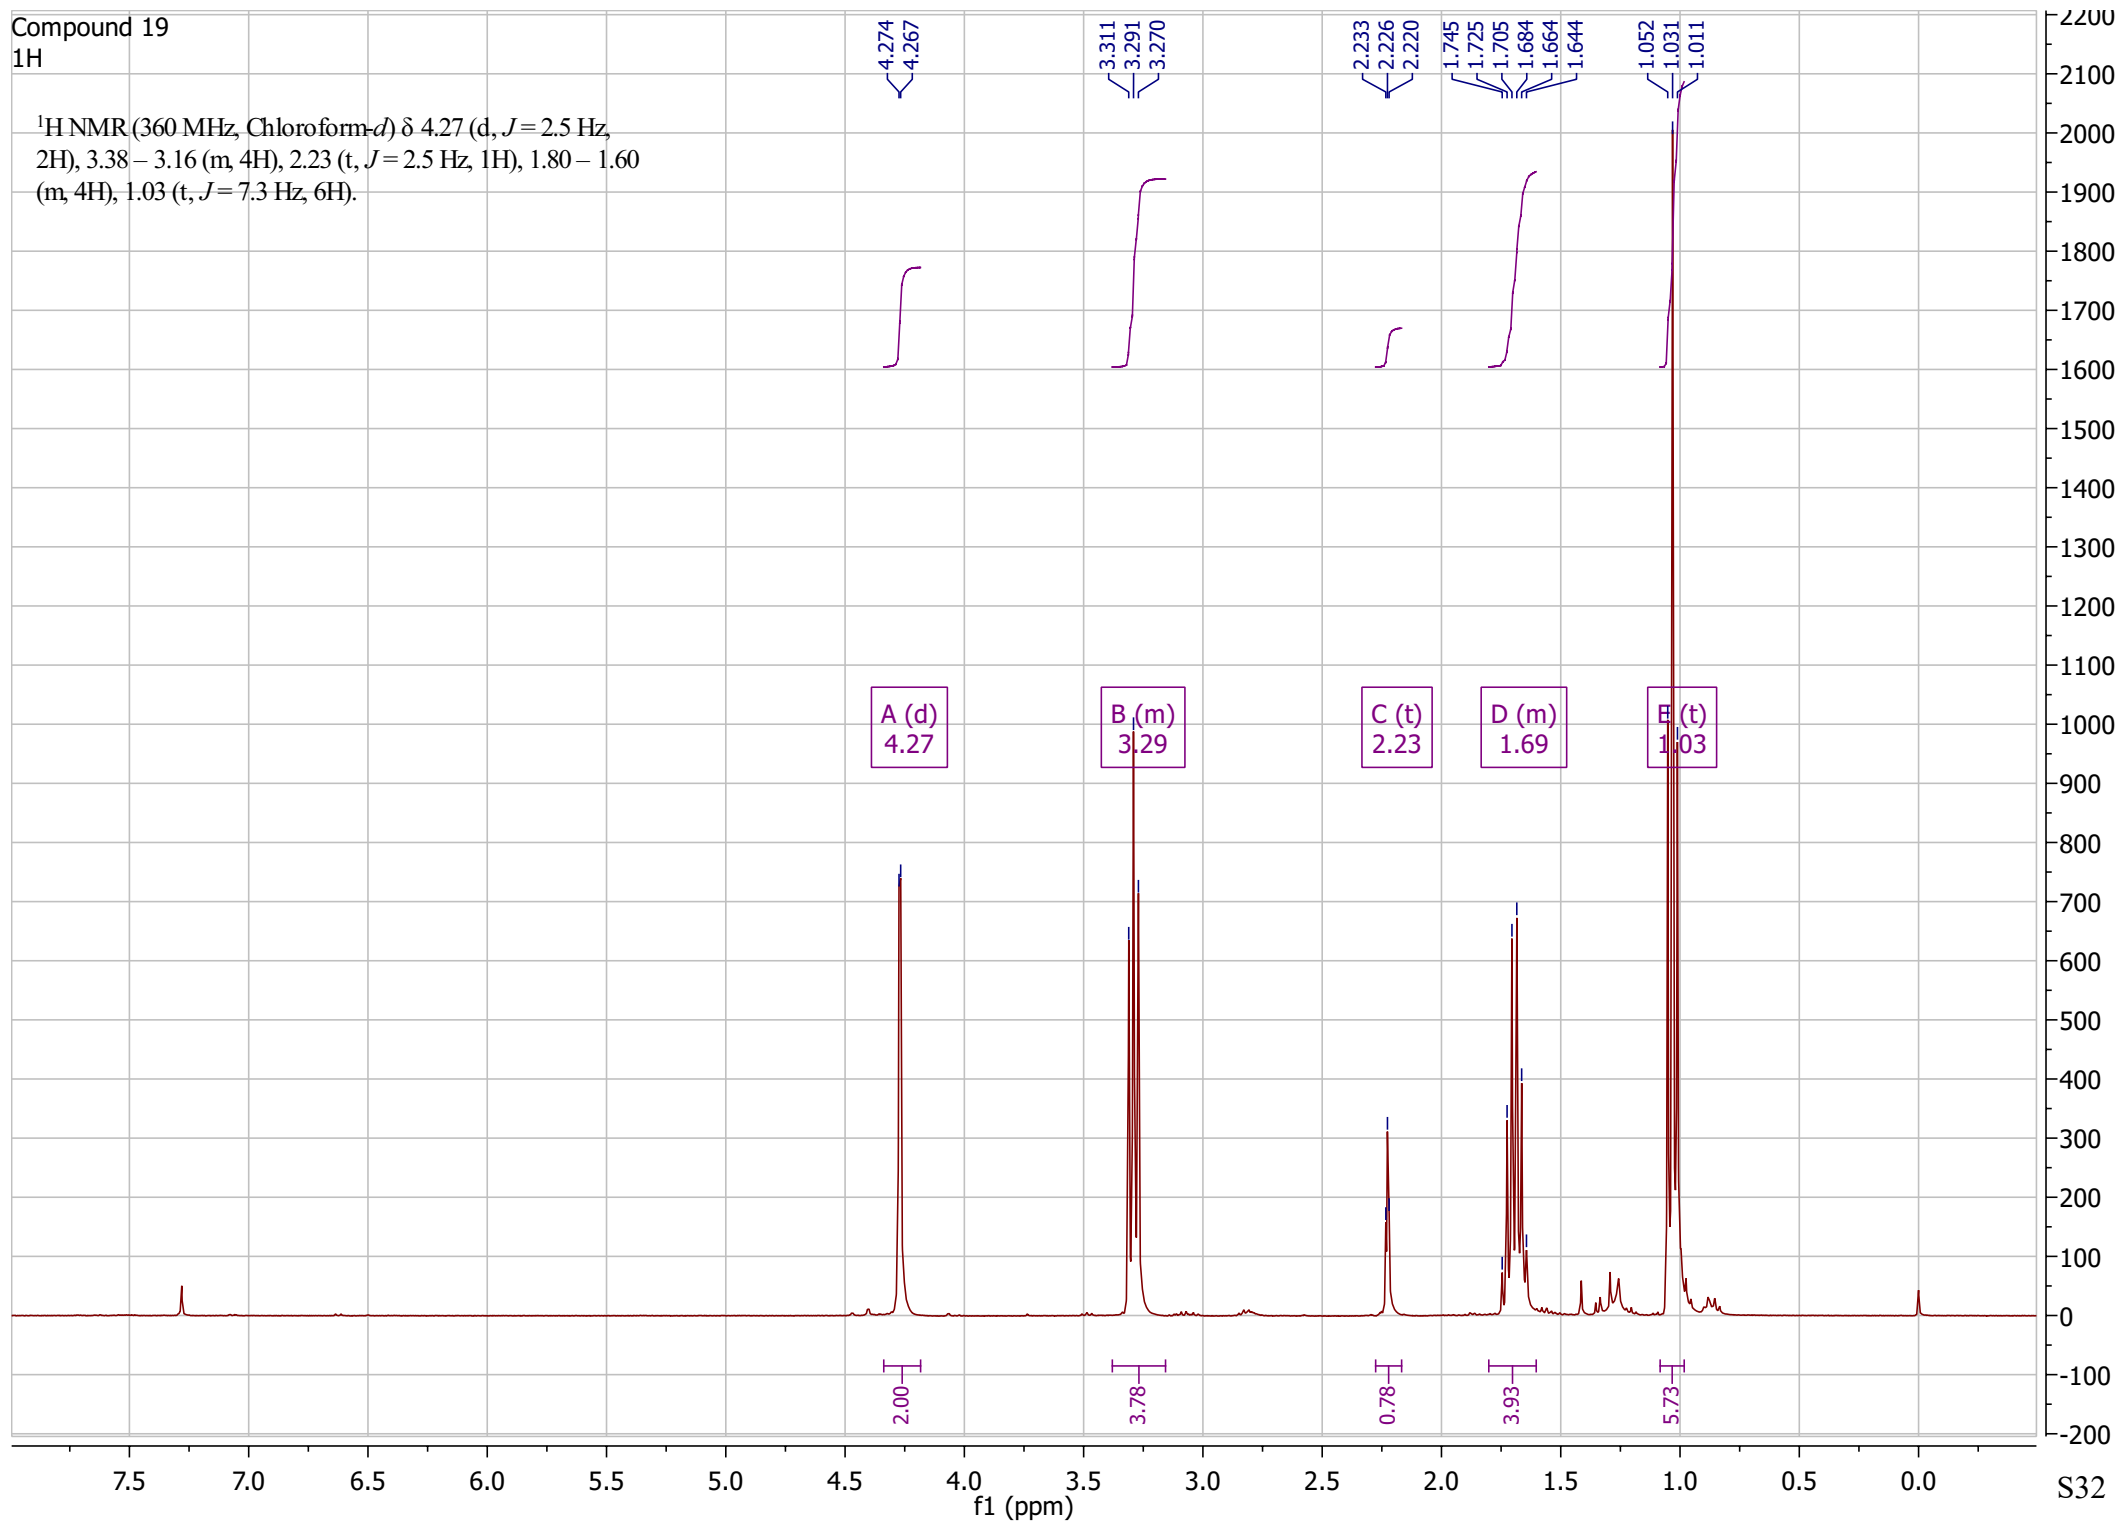

Compound 19  
13C

$^{13}\text{C}$  NMR (91 MHz,  $\text{CDCl}_3$ )  $\delta$  165.33, 136.07, 71.63,  
33.81, 27.56, 24.00, 13.20.

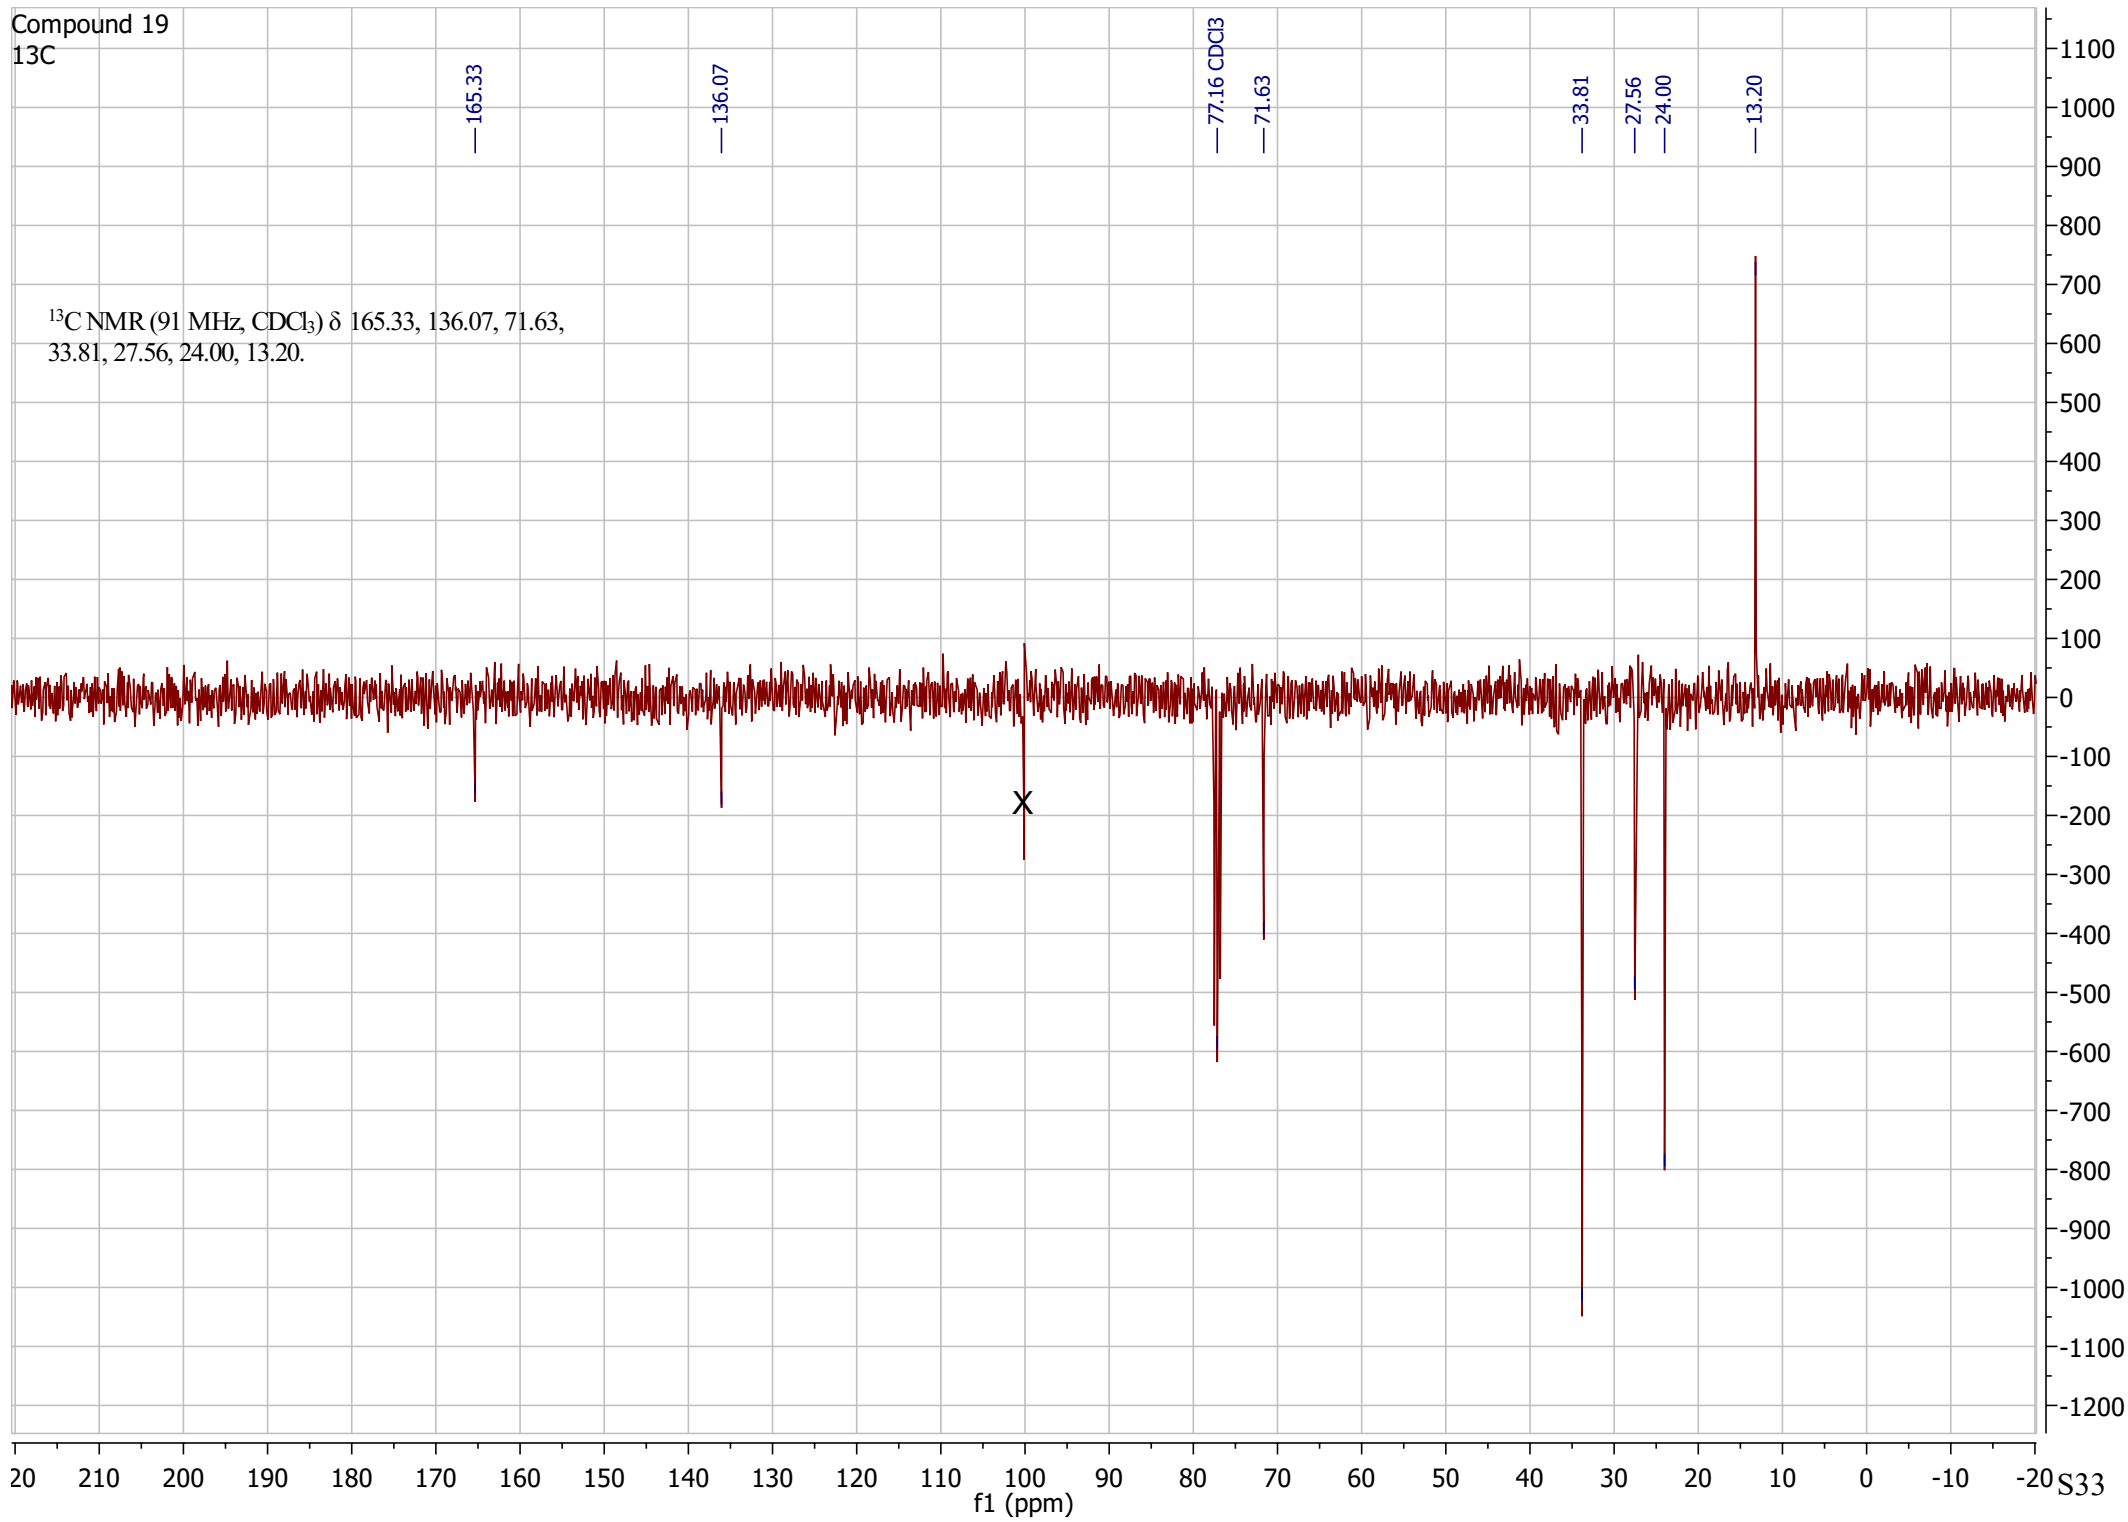

Compound 20  
1H

$^1\text{H}$  NMR (400 MHz,  $\text{CDCl}_3$ )  $\delta$  4.27 (d,  $J = 3.3$  Hz, 2H), 3.31 (t,  $J = 7.4$  Hz, 4H), 2.23 (t,  $J = 2.5$  Hz, 1H), 1.69 – 1.59 (m, 4H), 1.50 – 1.40 (m, 4H), 0.93 (t,  $J = 7.4$  Hz, 6H).

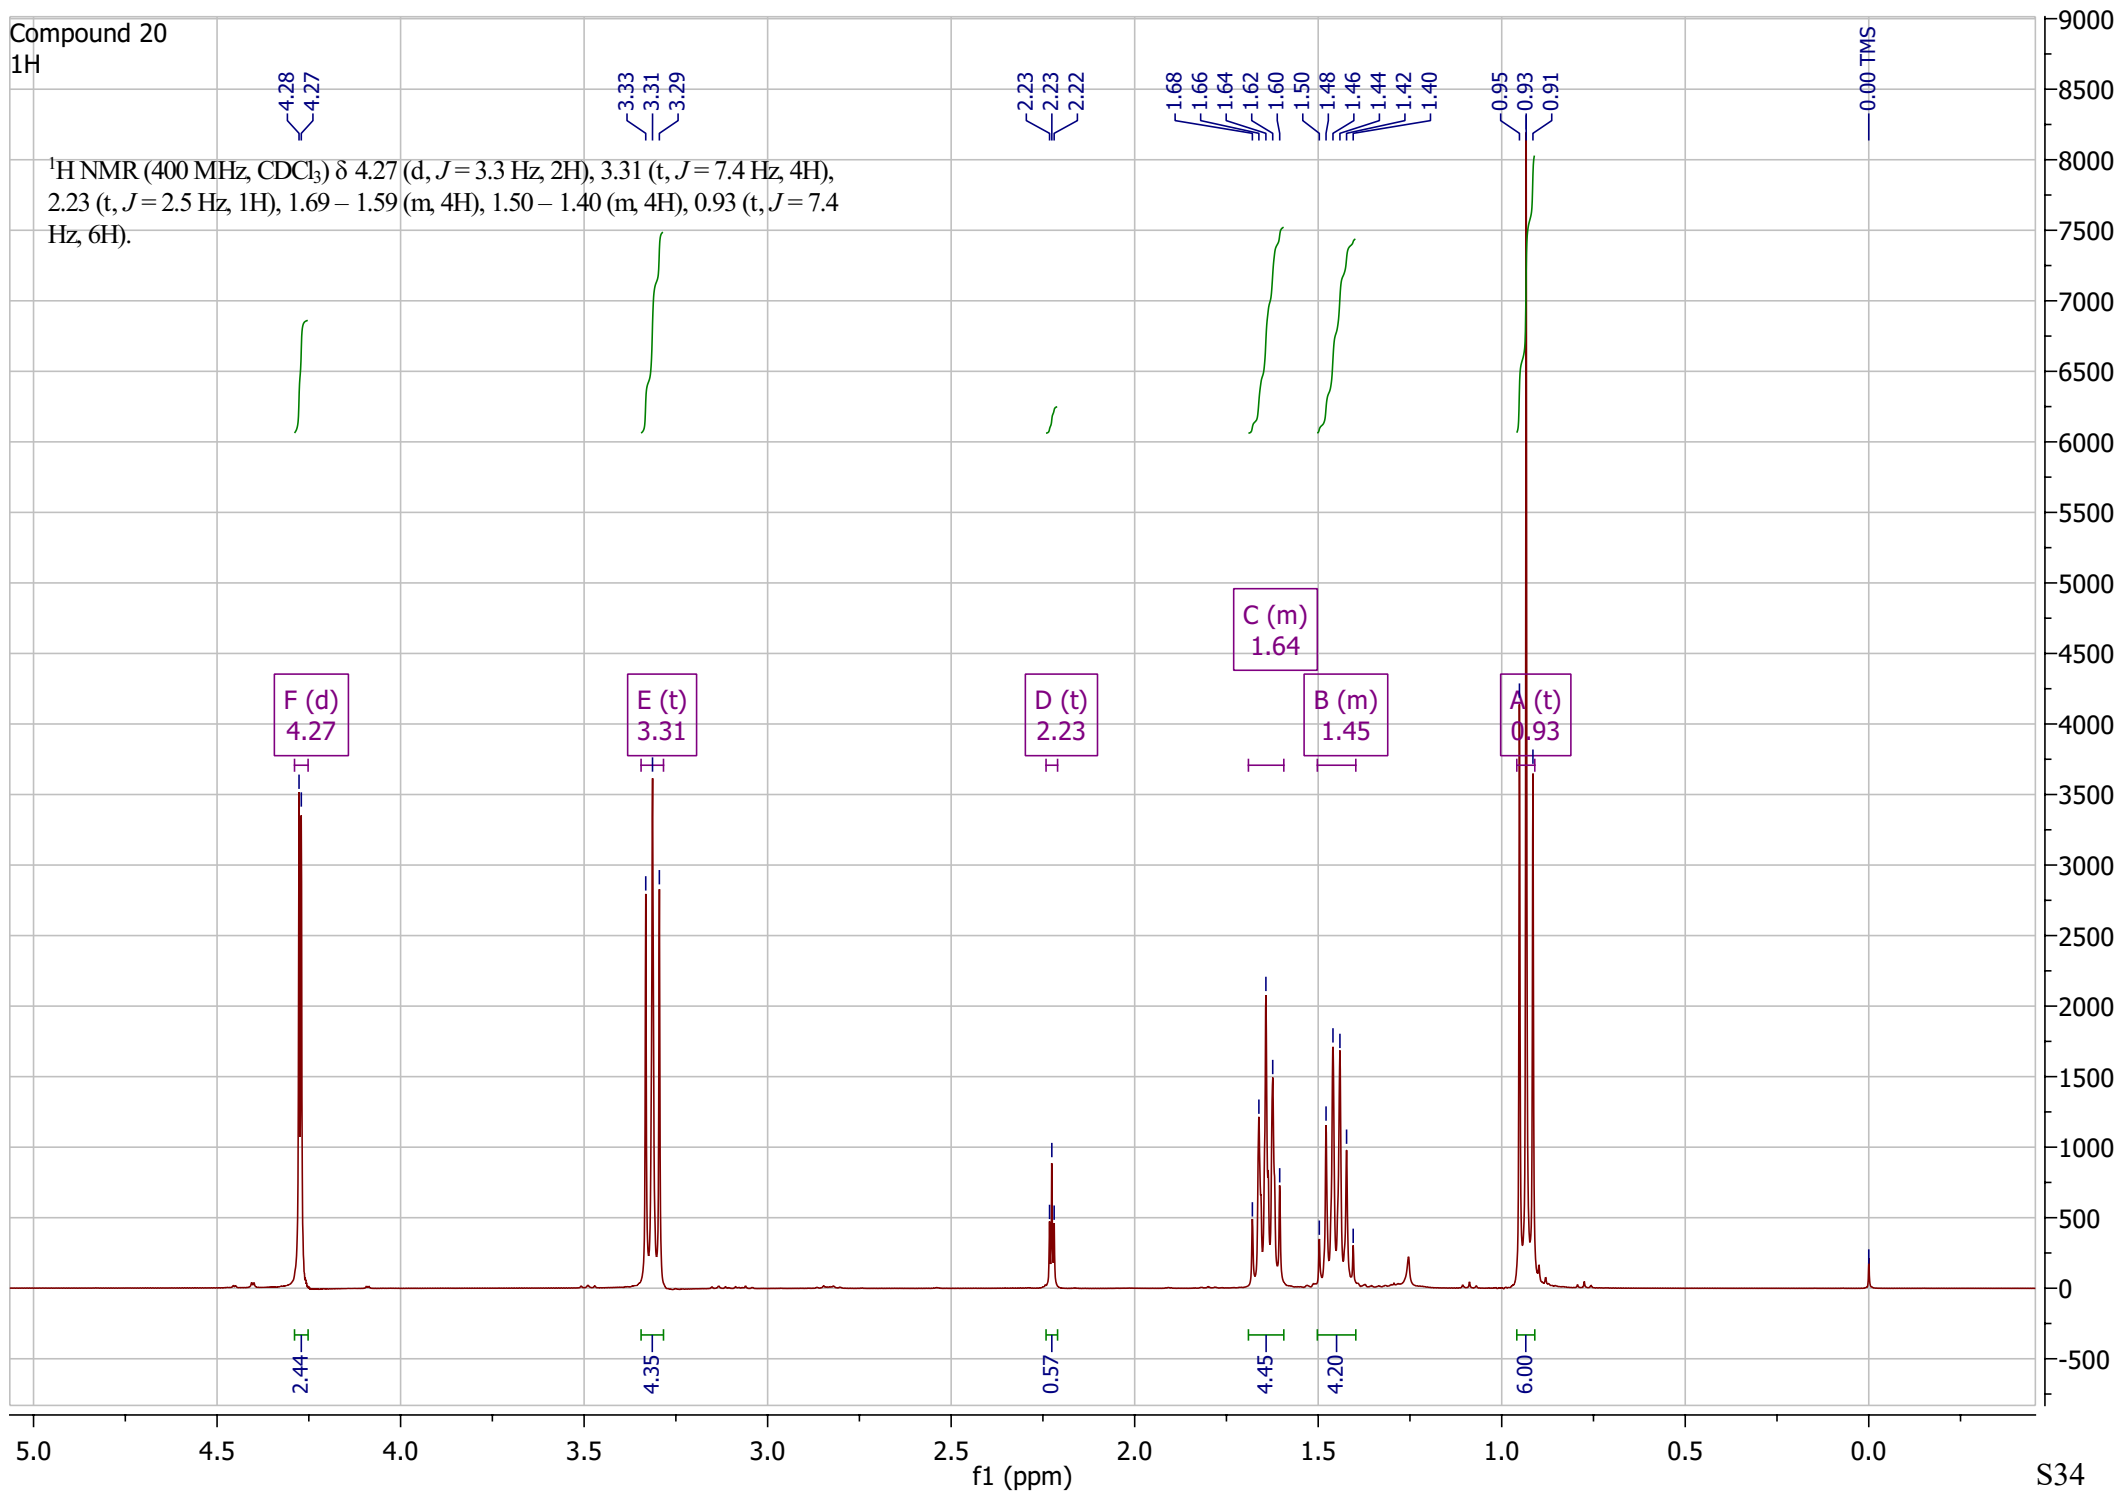

Compound 20  
13C

$^{13}\text{C}$  NMR (101 MHz,  $\text{CDCl}_3$ )  $\delta$  165.37, 136.07, 71.64, 32.58, 31.66, 27.57,  
21.77, 13.69.

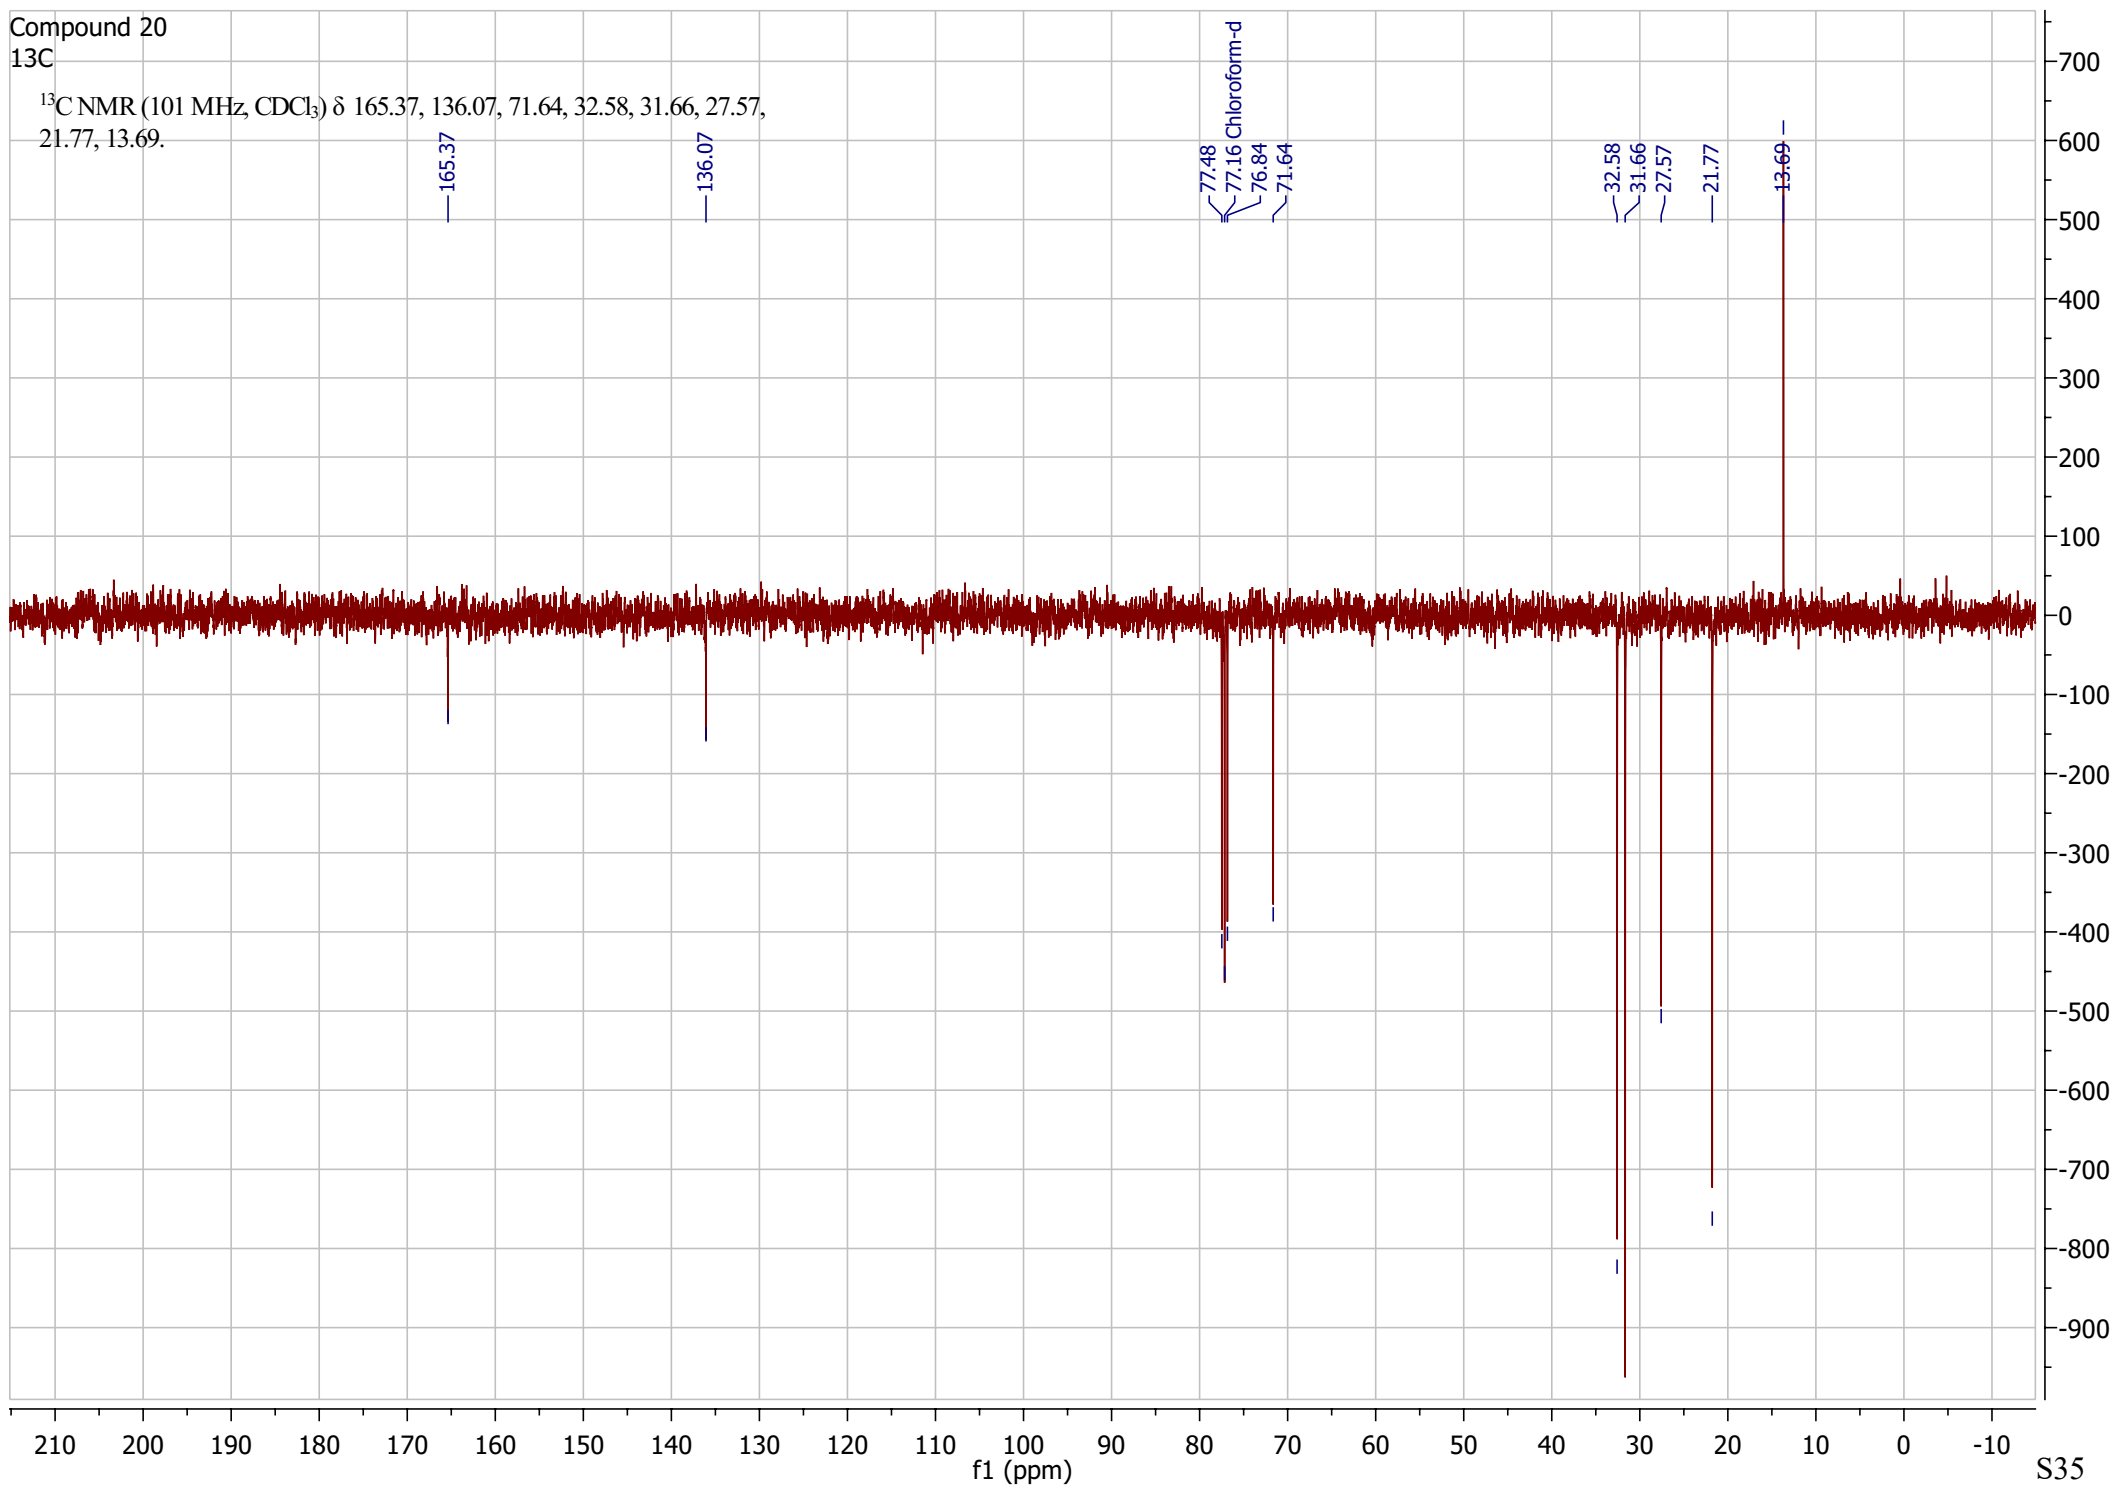

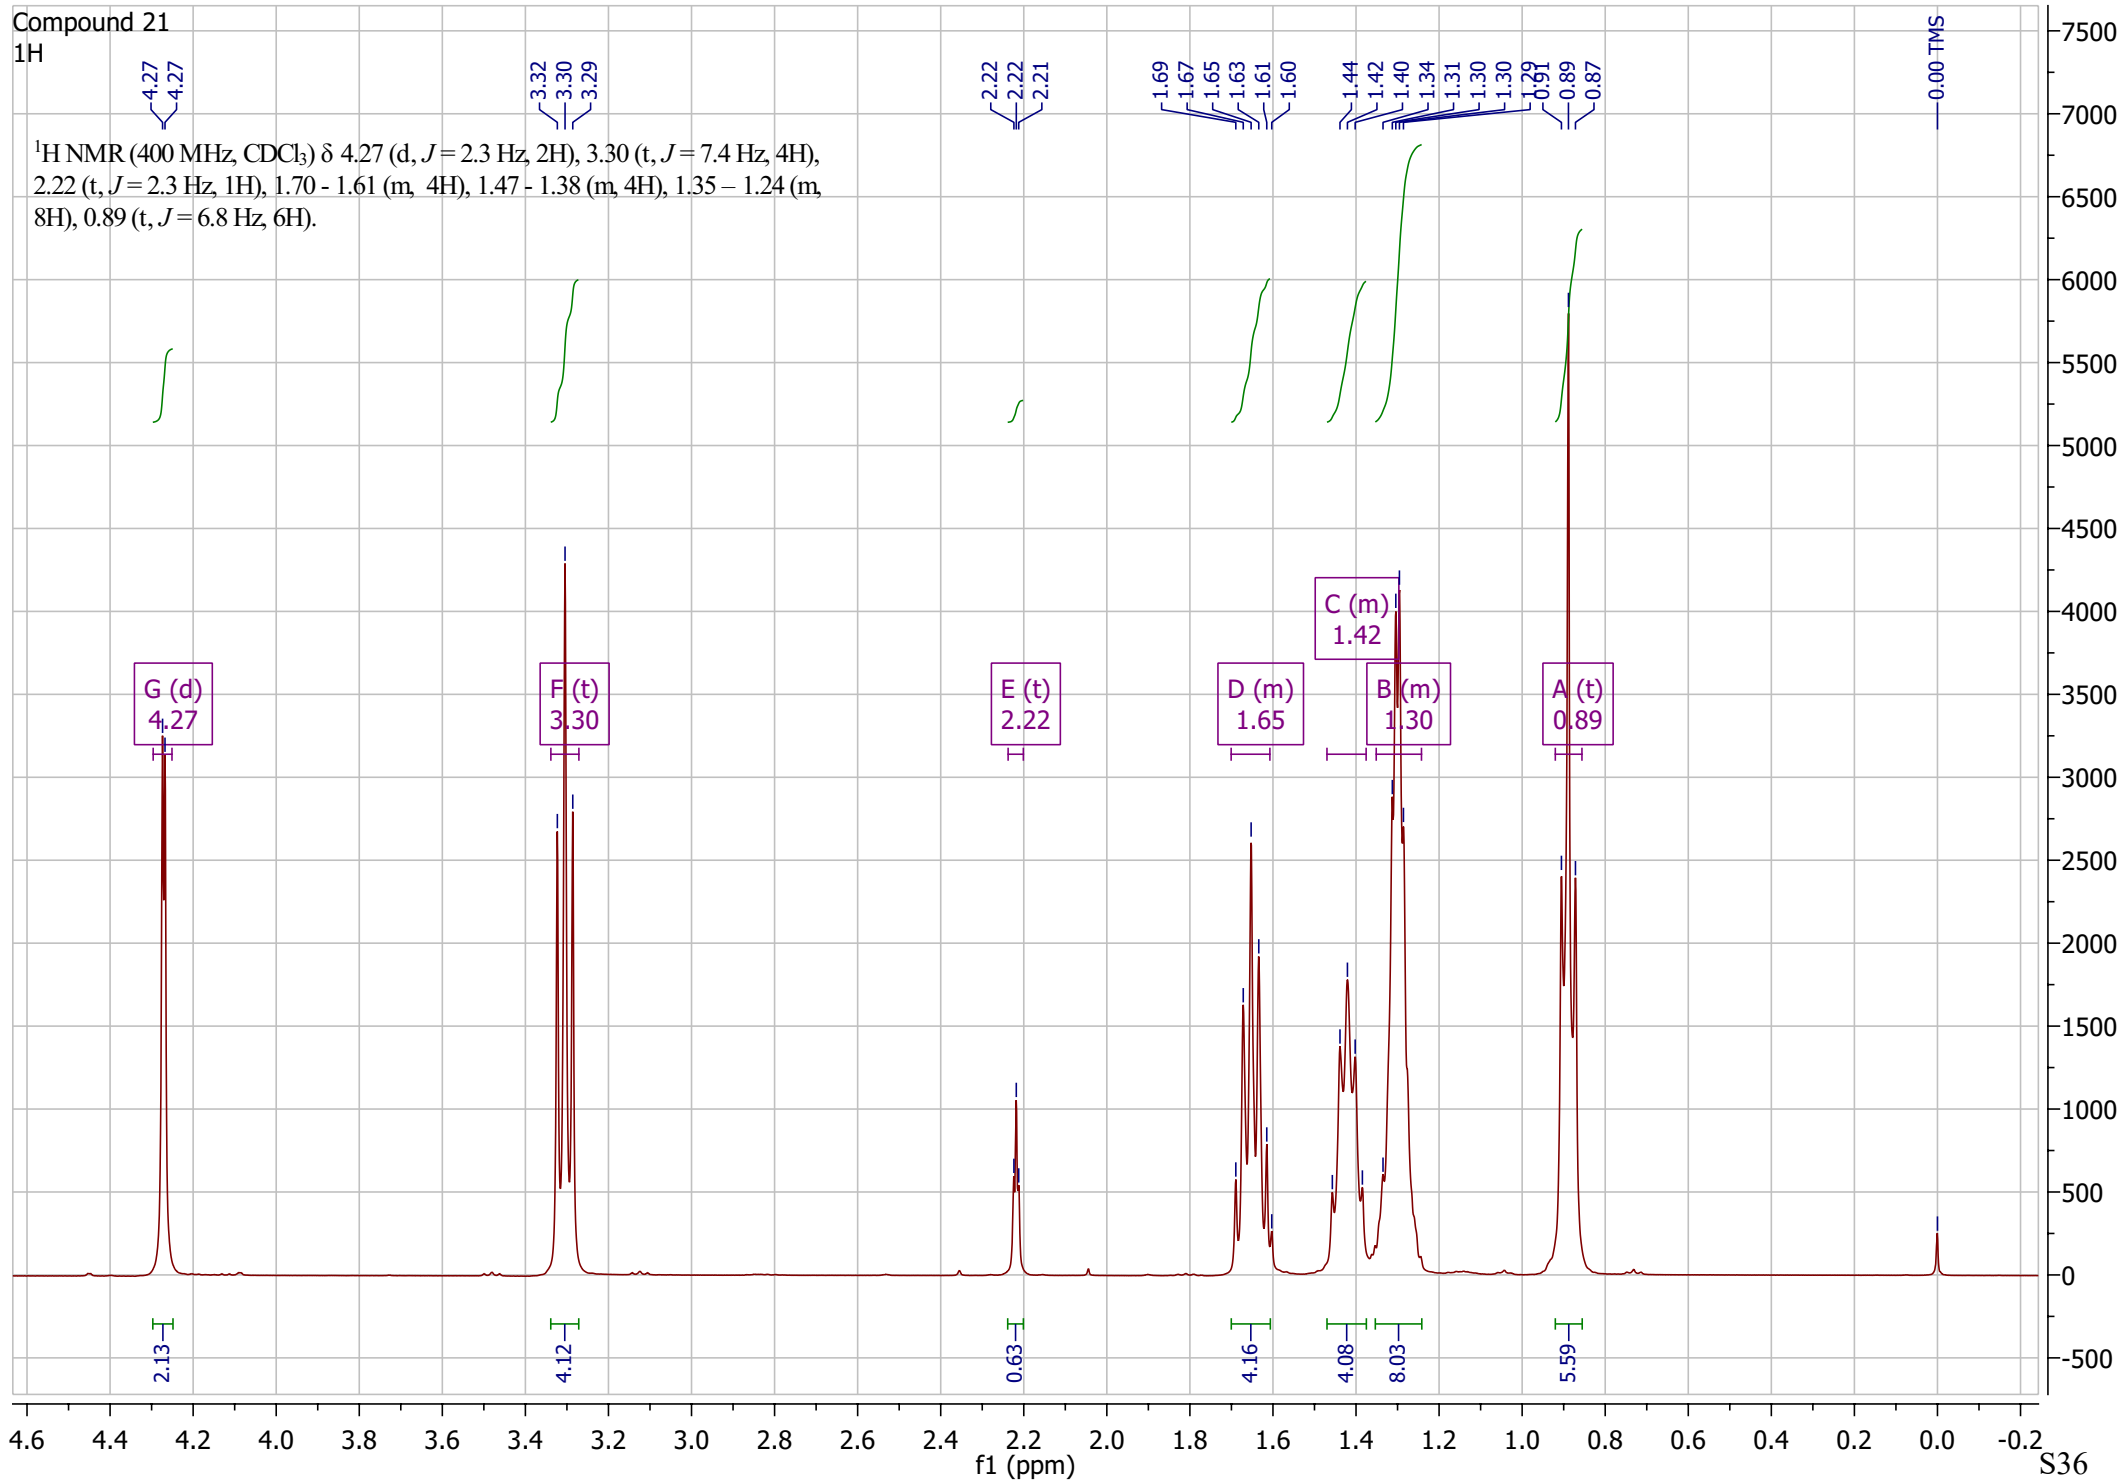



Compound 21  
13C

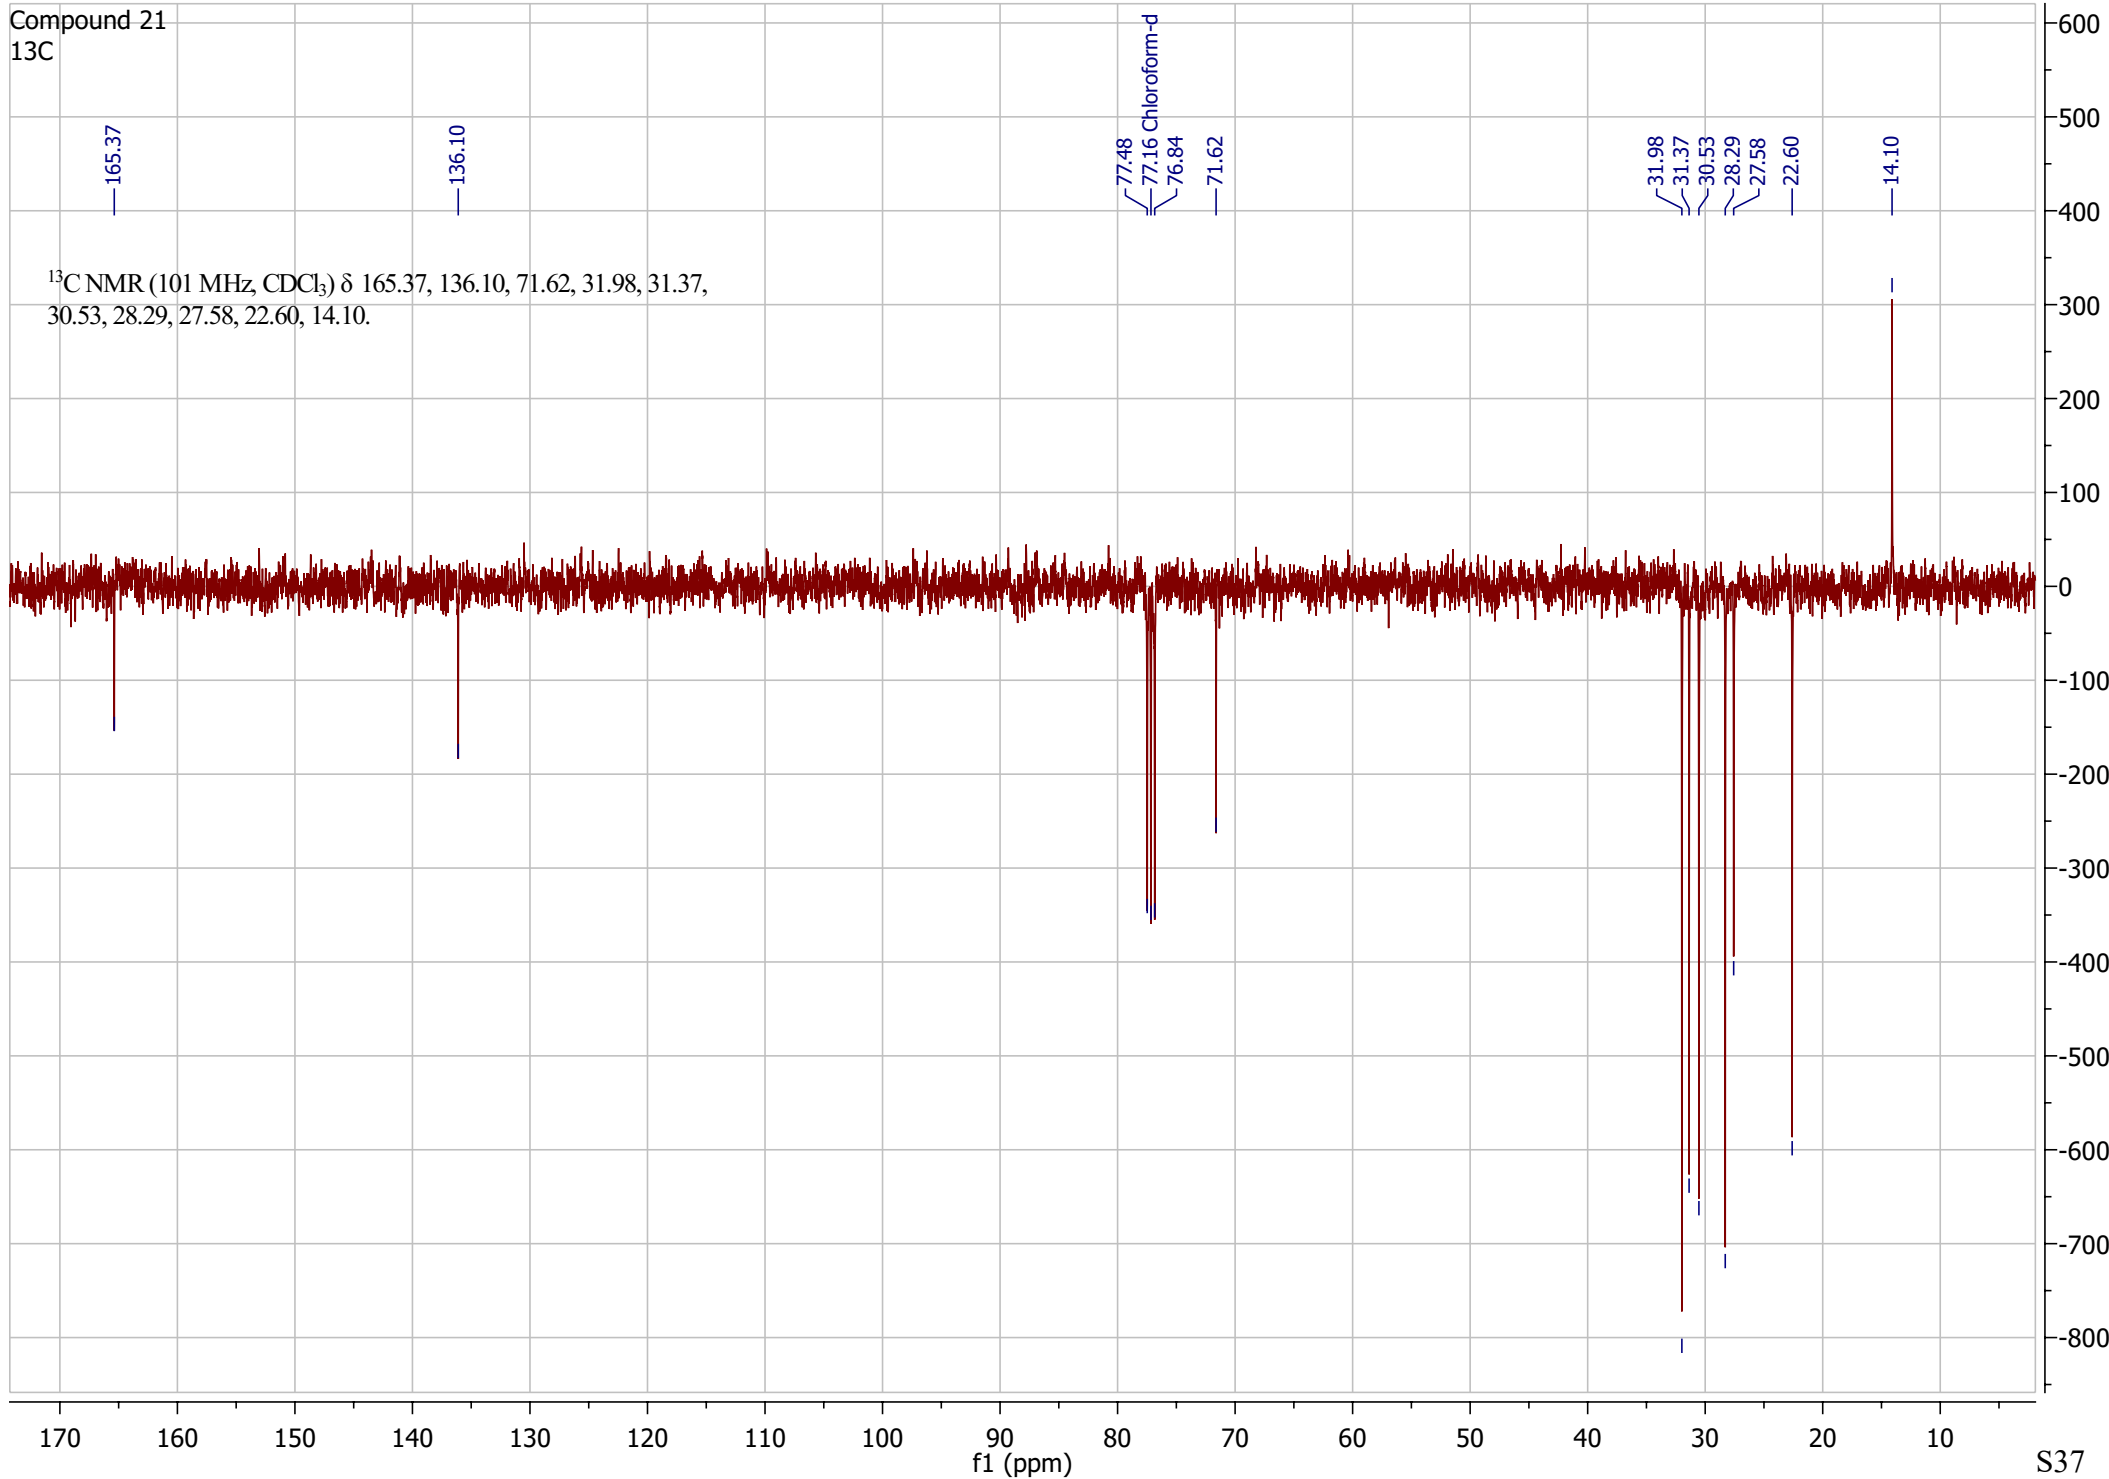

Compound 22  
1H

$^1\text{H}$  NMR (400 MHz,  $\text{CDCl}_3$ )  $\delta$  4.27 (d,  $J = 2.4$  Hz, 4H), 3.34 – 3.26 (m, 4H), 2.22 (t,  $J = 2.5$  Hz, 1H), 1.69 – 1.60 (m, 4H), 1.45 – 1.36 (m, 4H), 1.27 (br s, 16H), 0.88 (t,  $J = 6.8$  Hz, 6H).

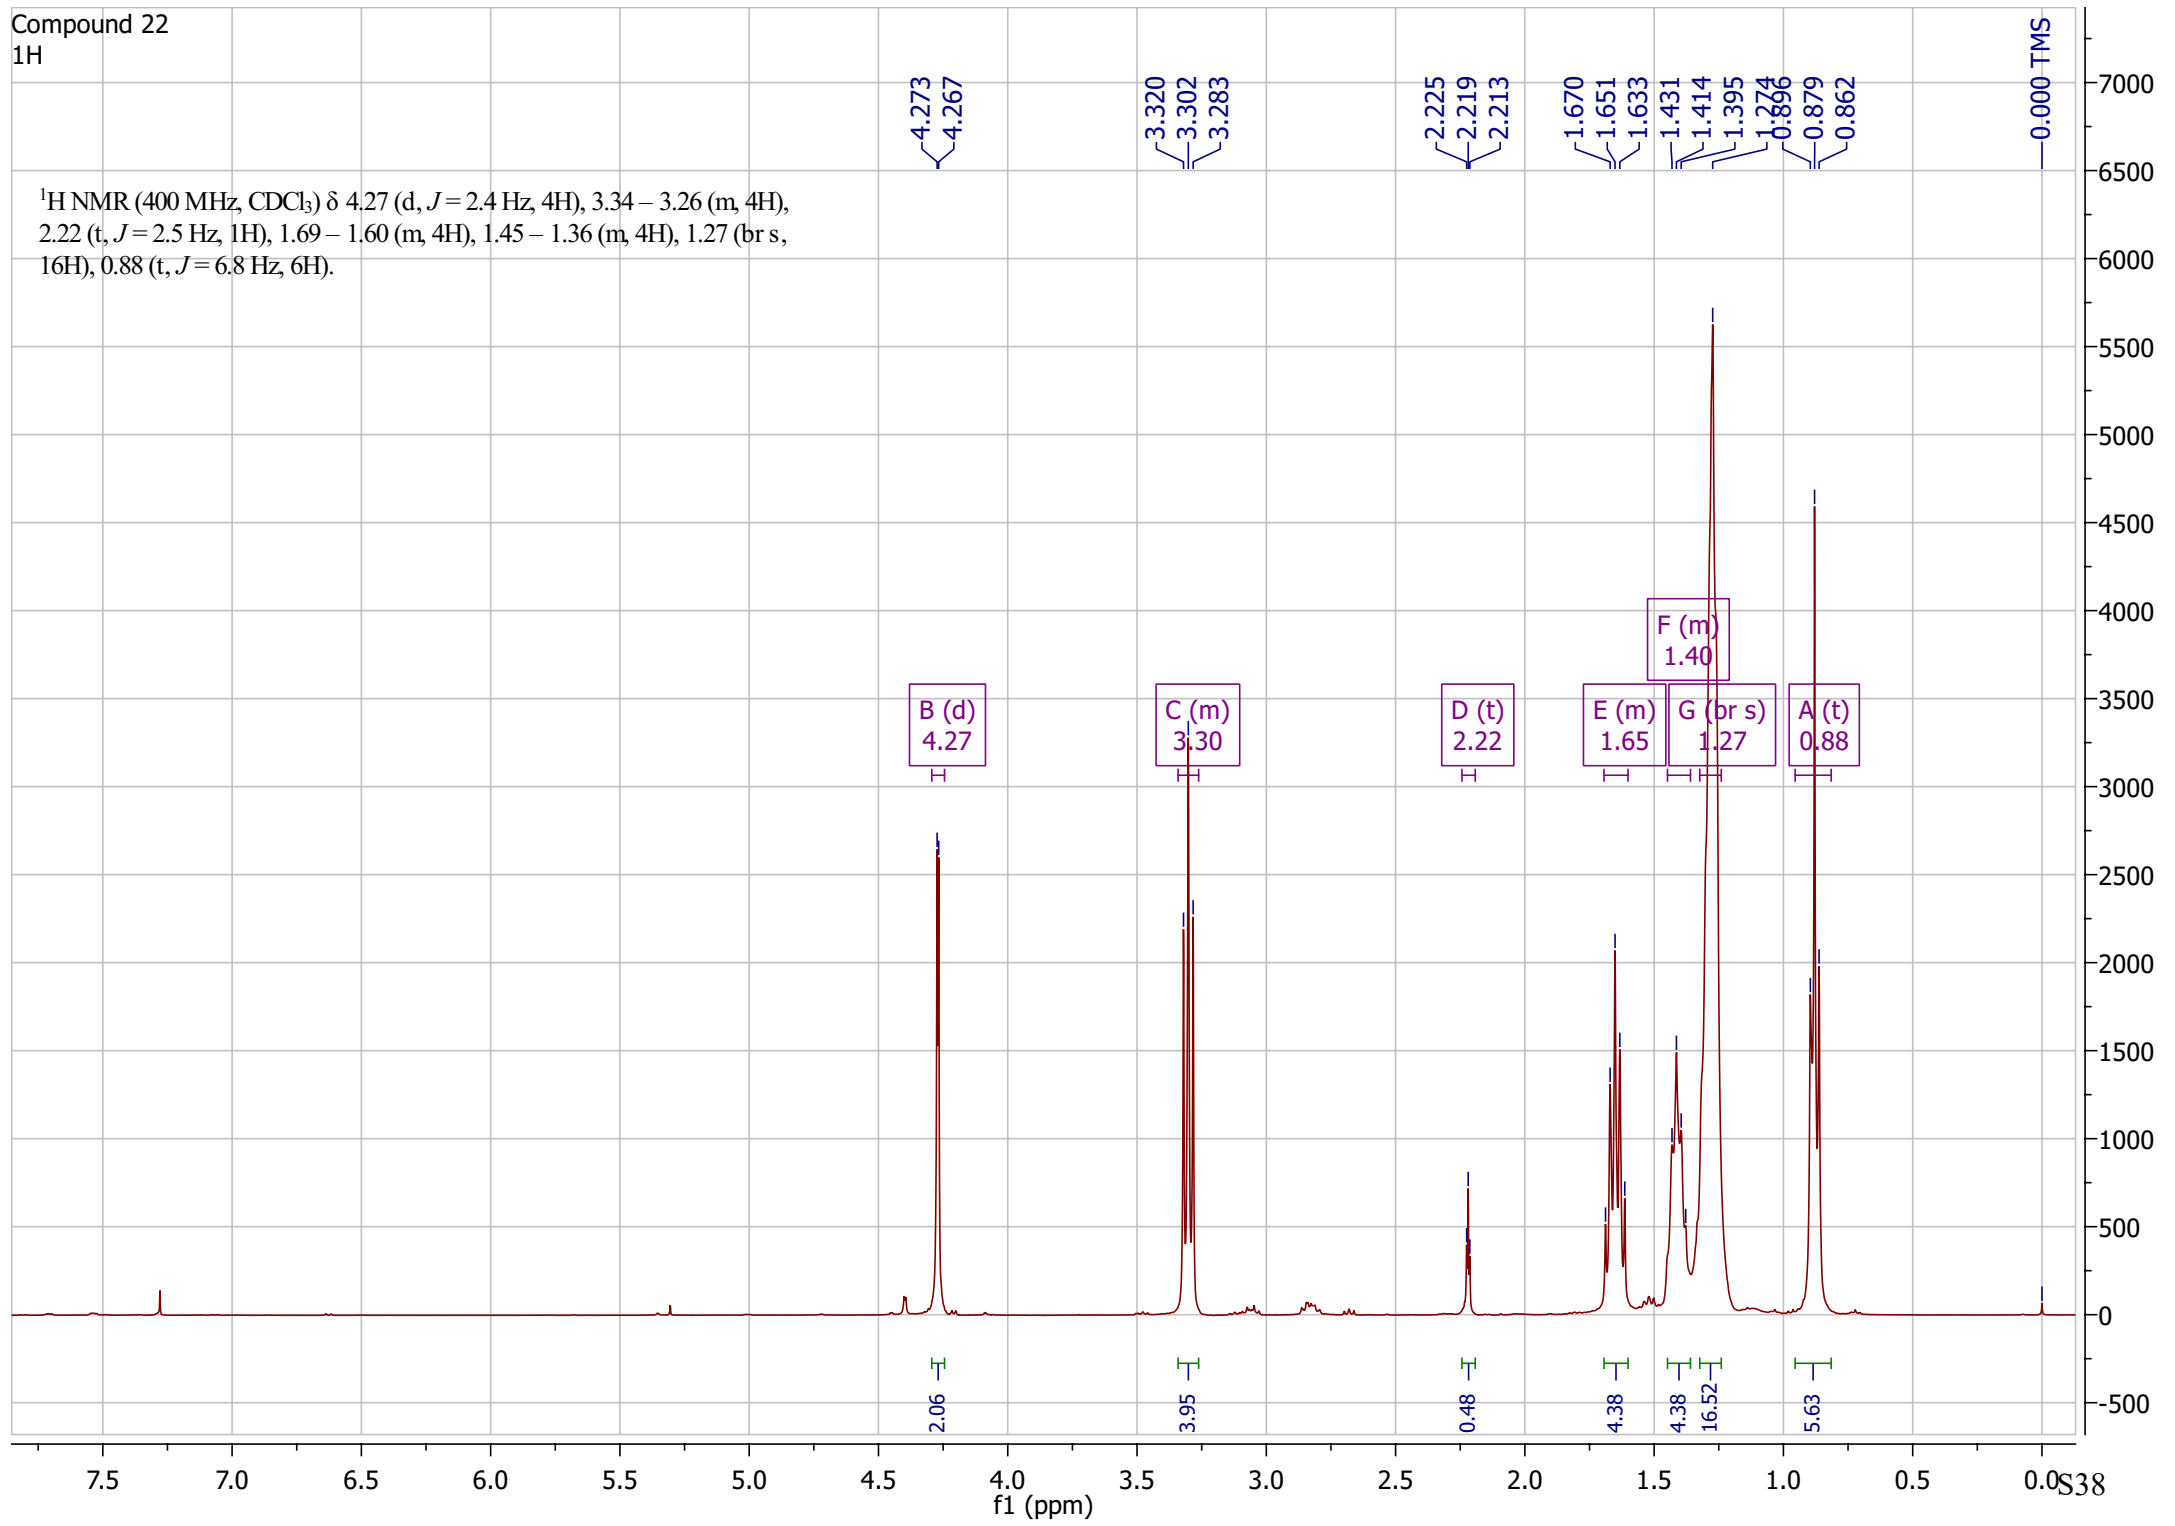

Compound 22  
13C

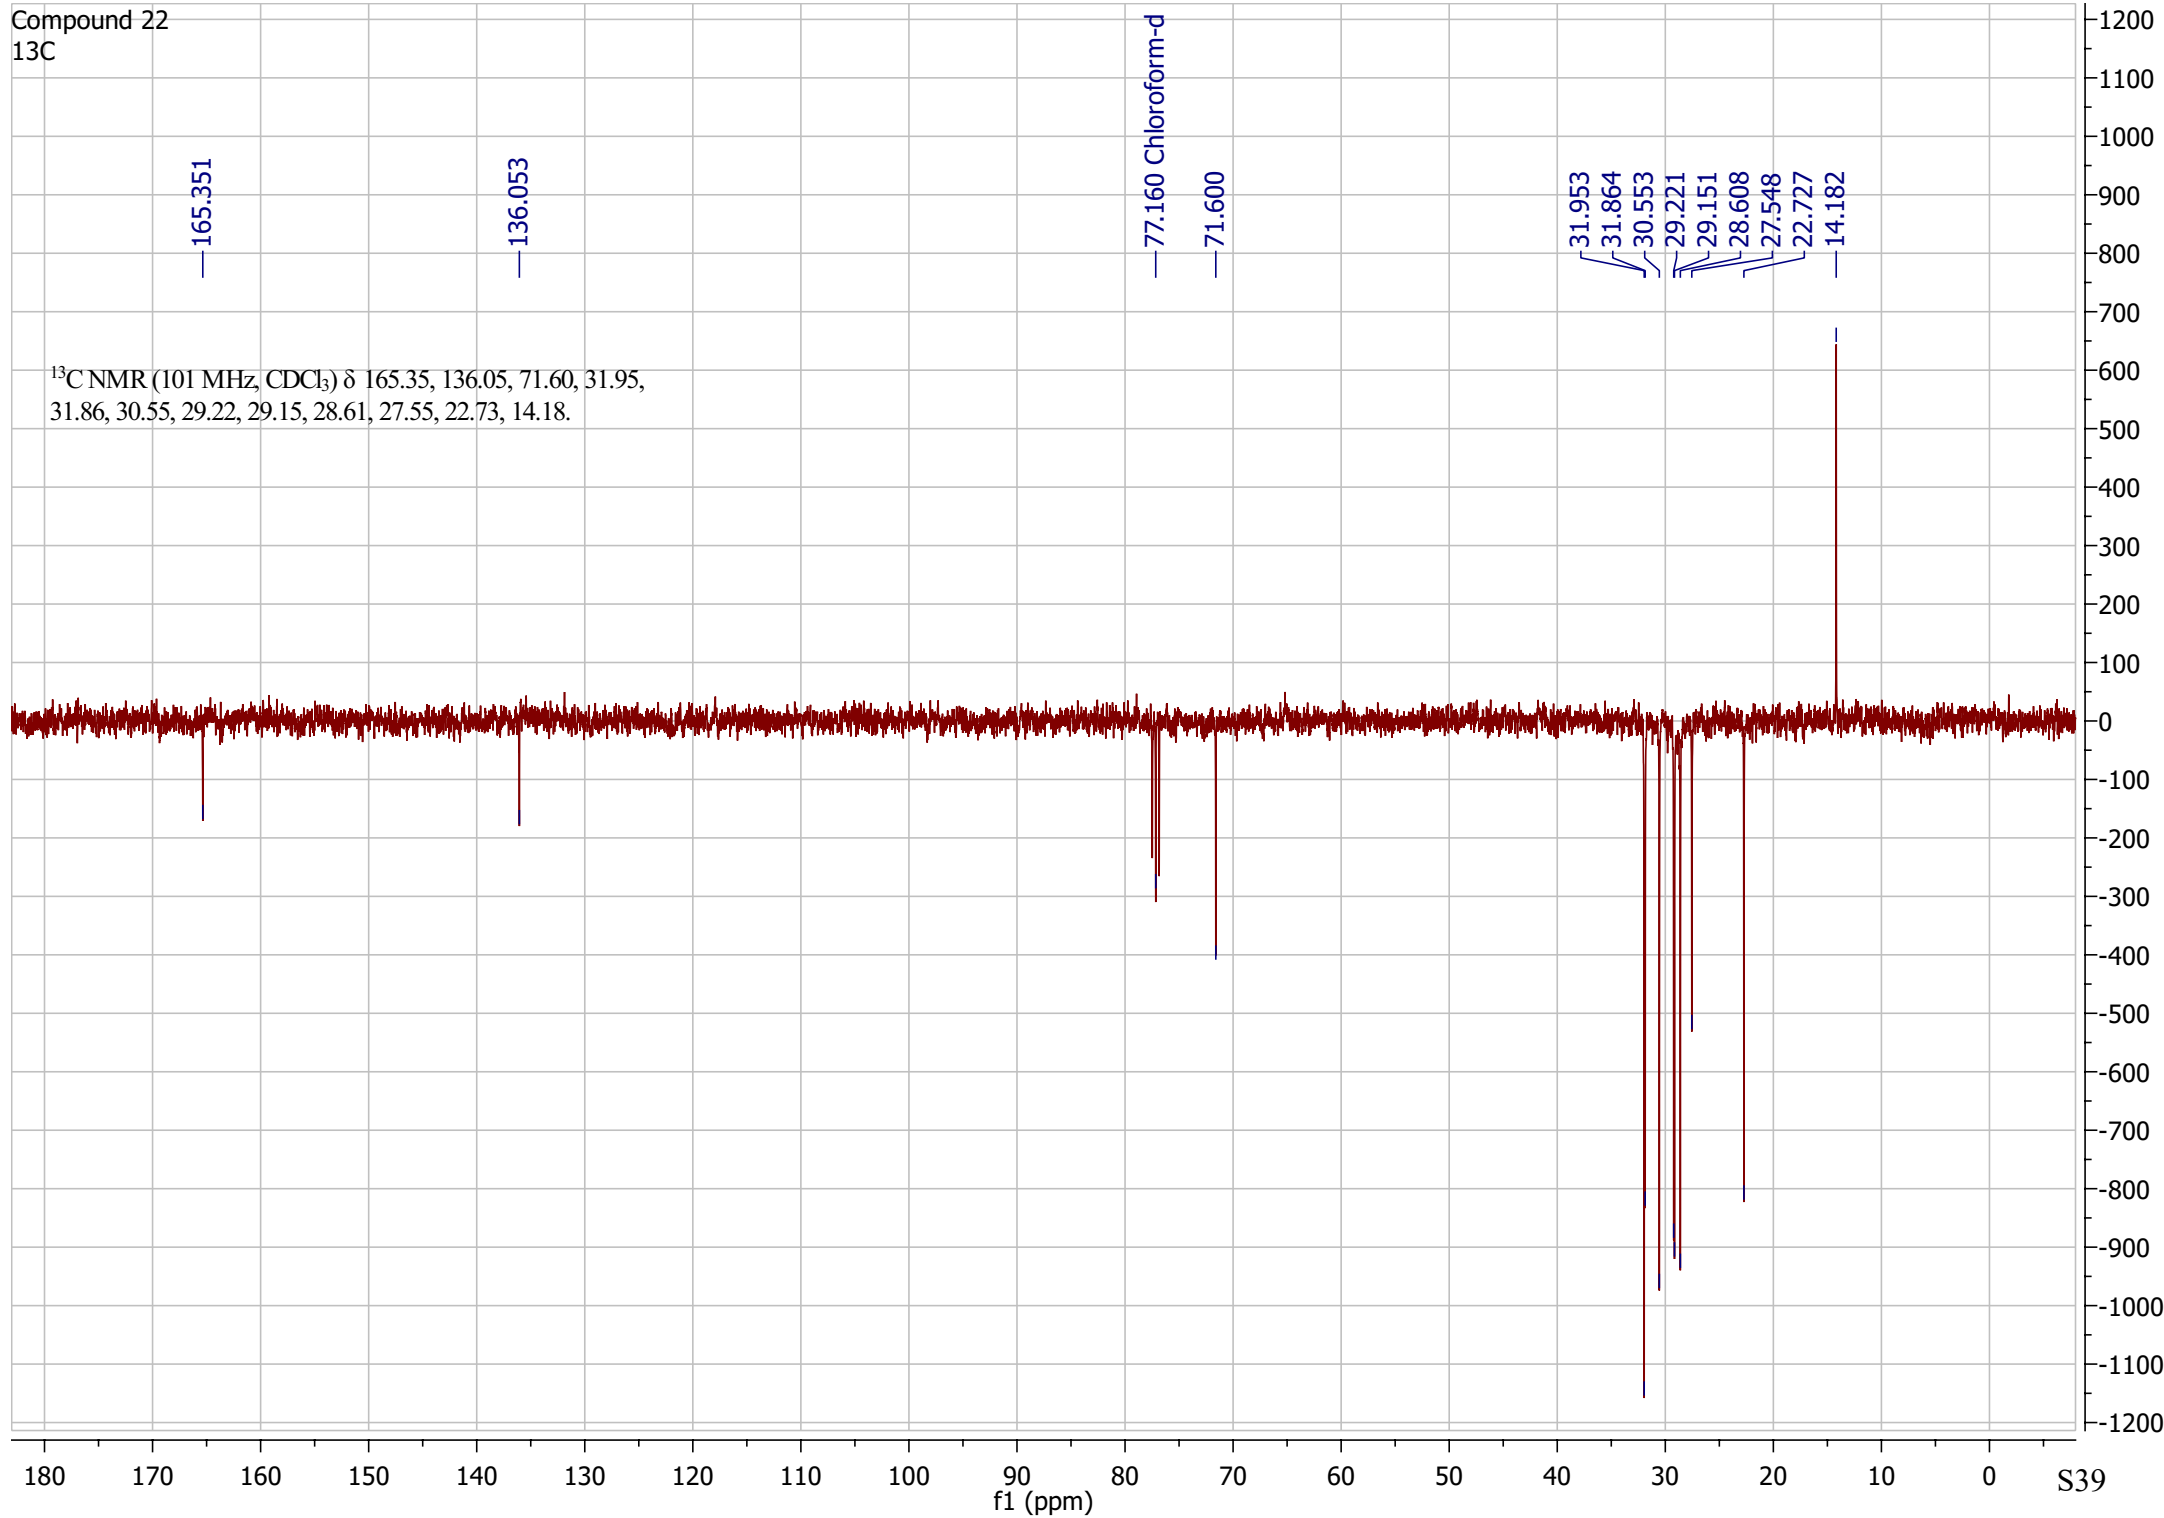

## Compound 23

<sup>1</sup>H

<sup>1</sup>H NMR (360 MHz, Chloroform-*d*)  $\delta$  4.27 (d,  $J = 2.5$  Hz, 2H), 3.36 – 3.22 (m, 4H), 2.21 (t,  $J = 2.5$  Hz, 1H), 1.64 (dq,  $J = 13.6, 6.5, 5.9$  Hz, 4H), 1.48 – 1.36 (m, 4H), 1.26 (s, 32H), 0.88 (t,  $J = 6.7$  Hz, 6H).

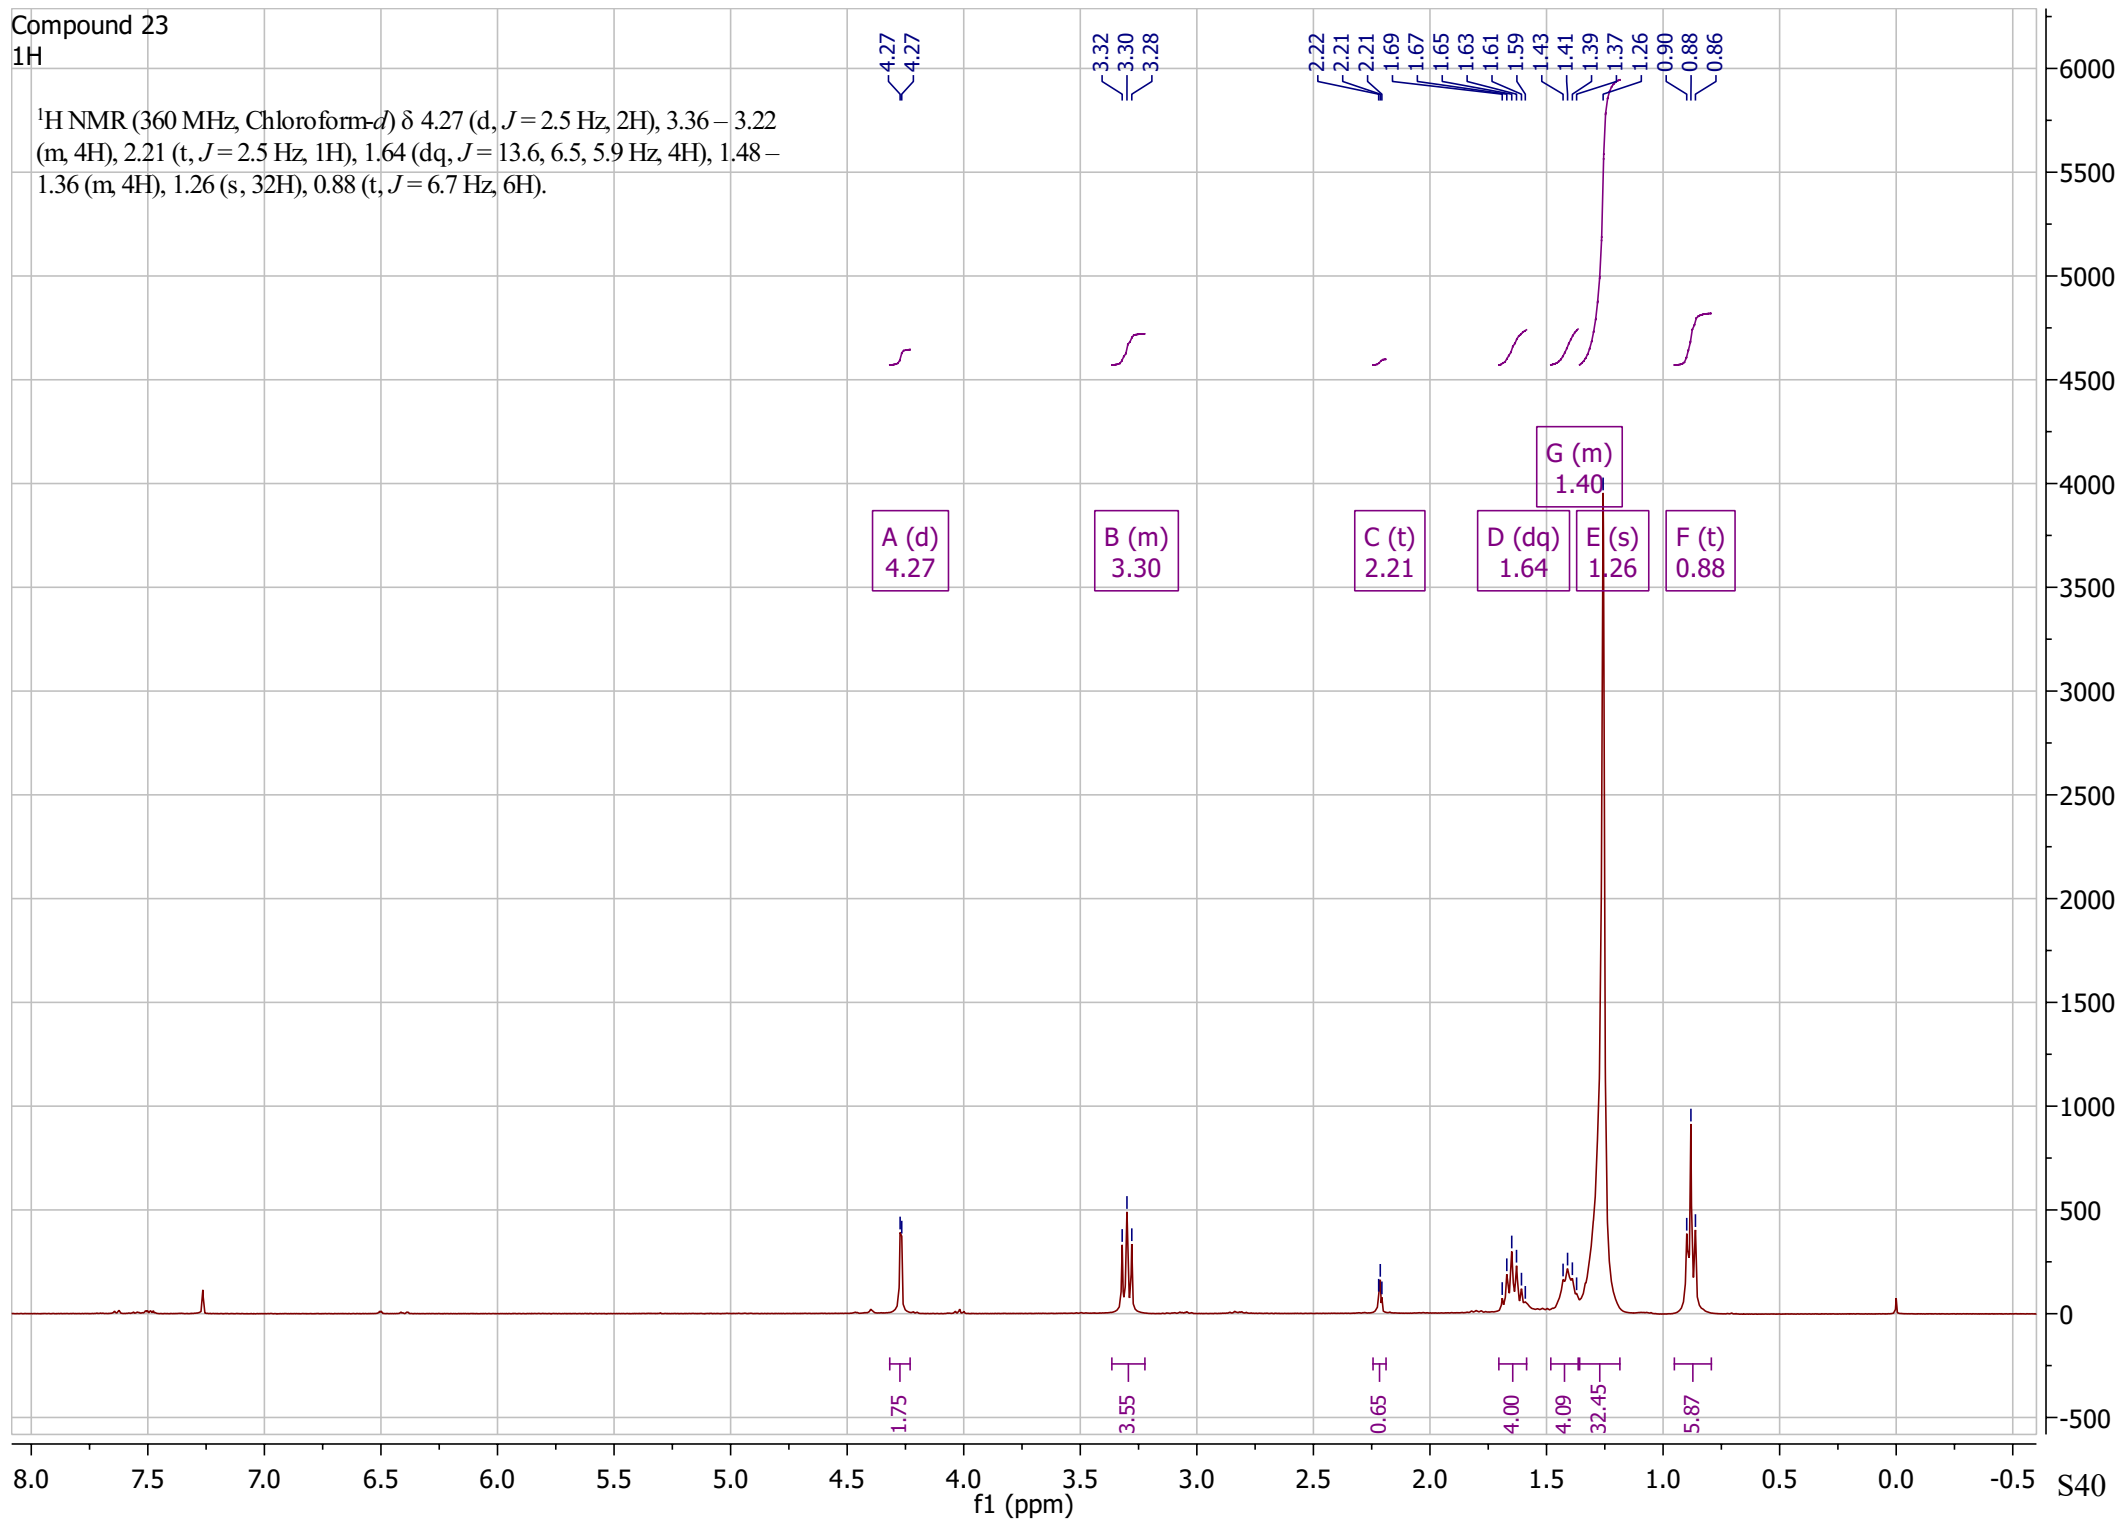

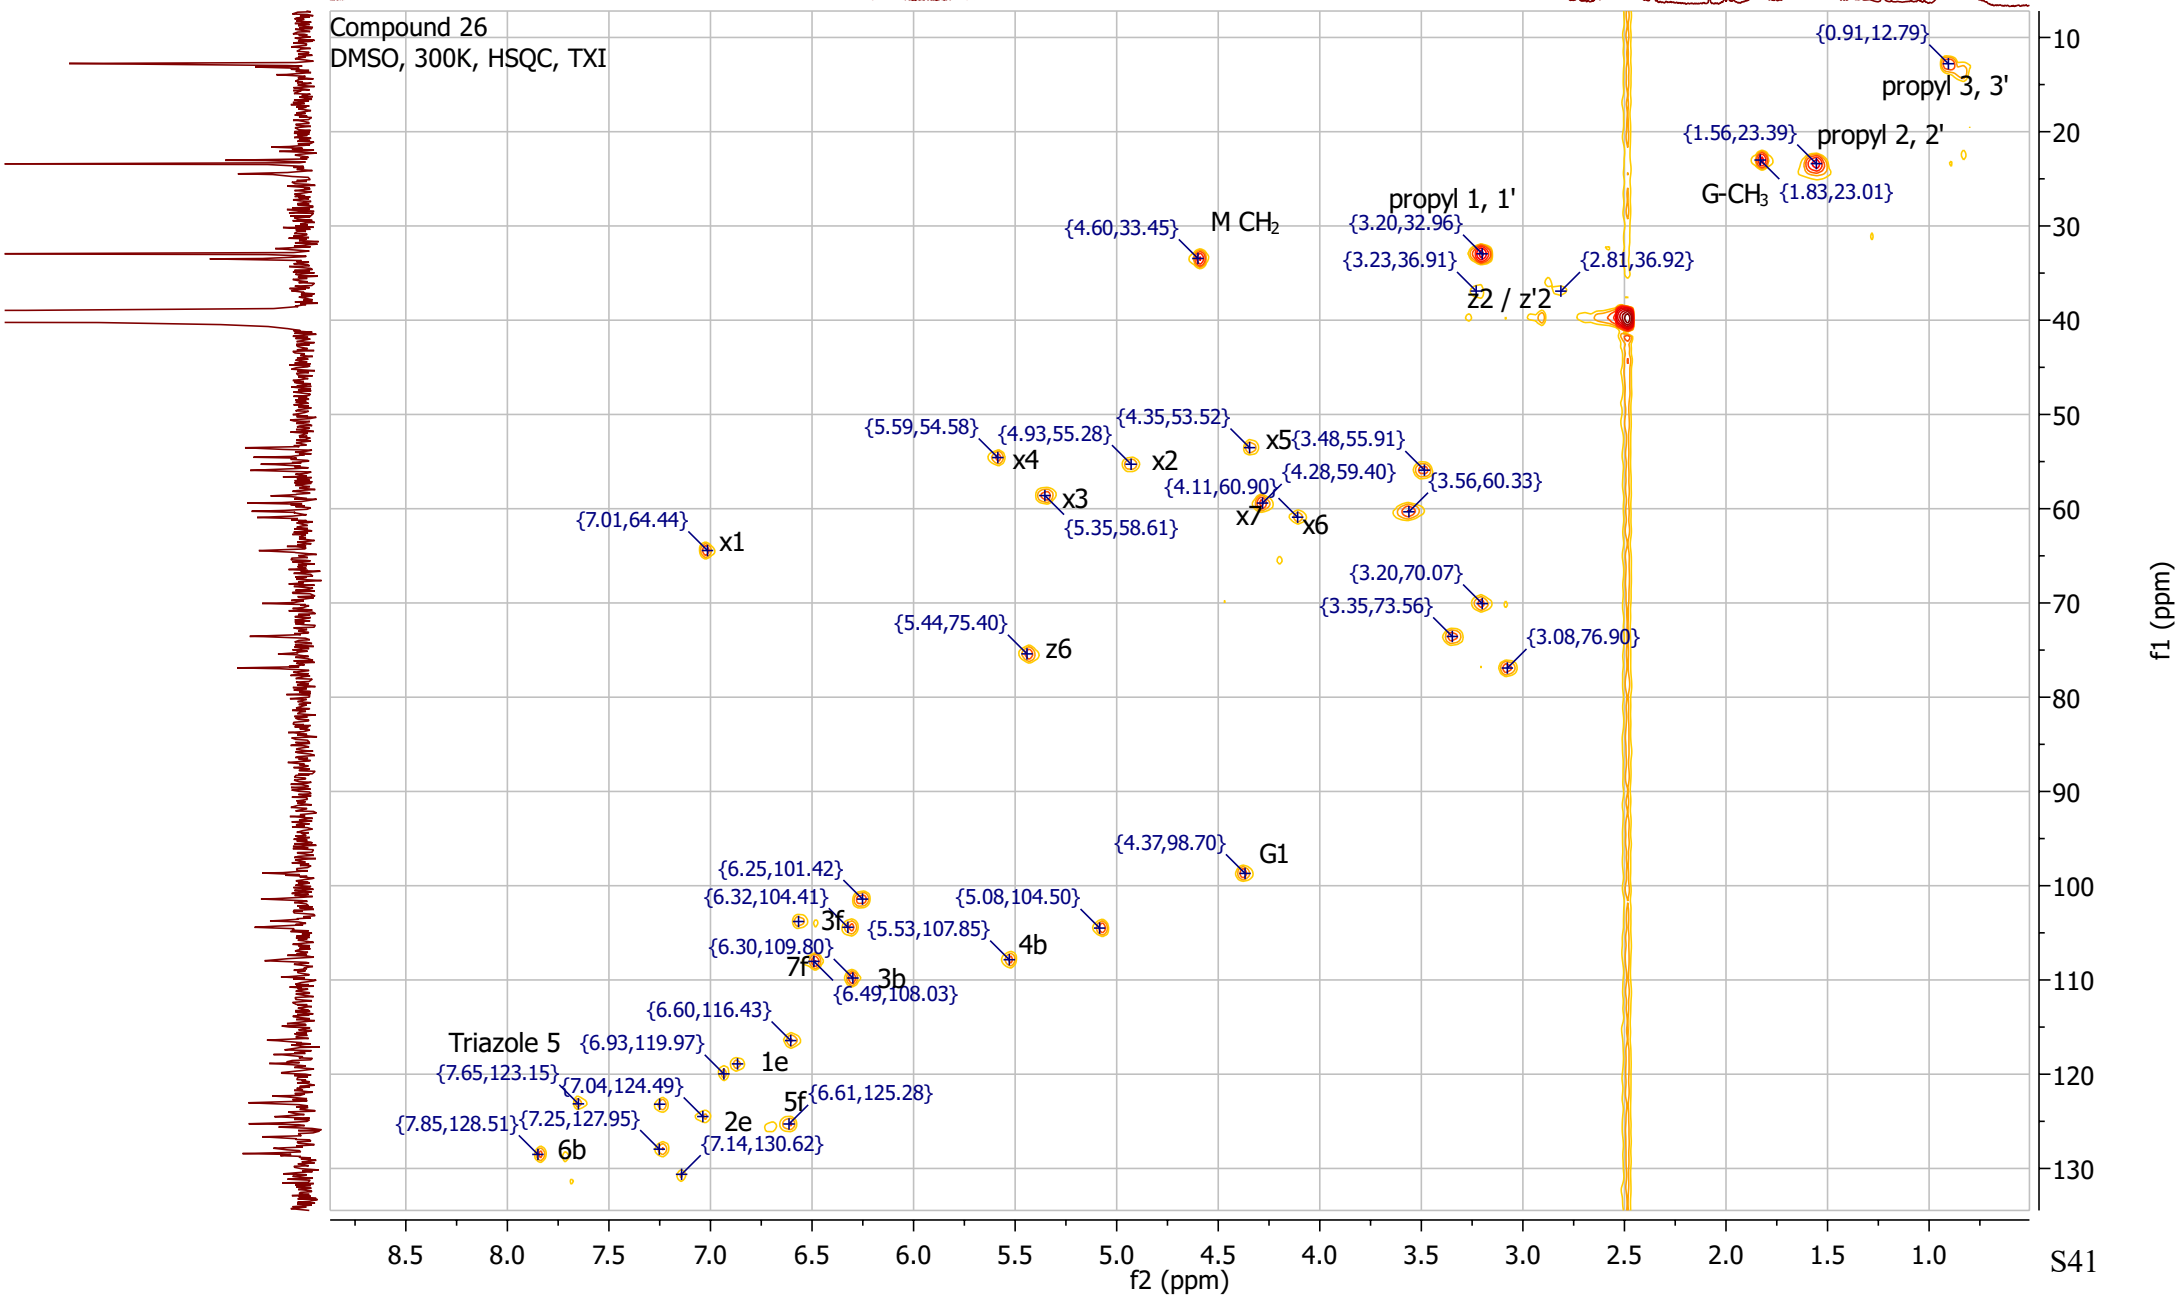

Compound 26  
DMSO, 300K, 13C, DUAL

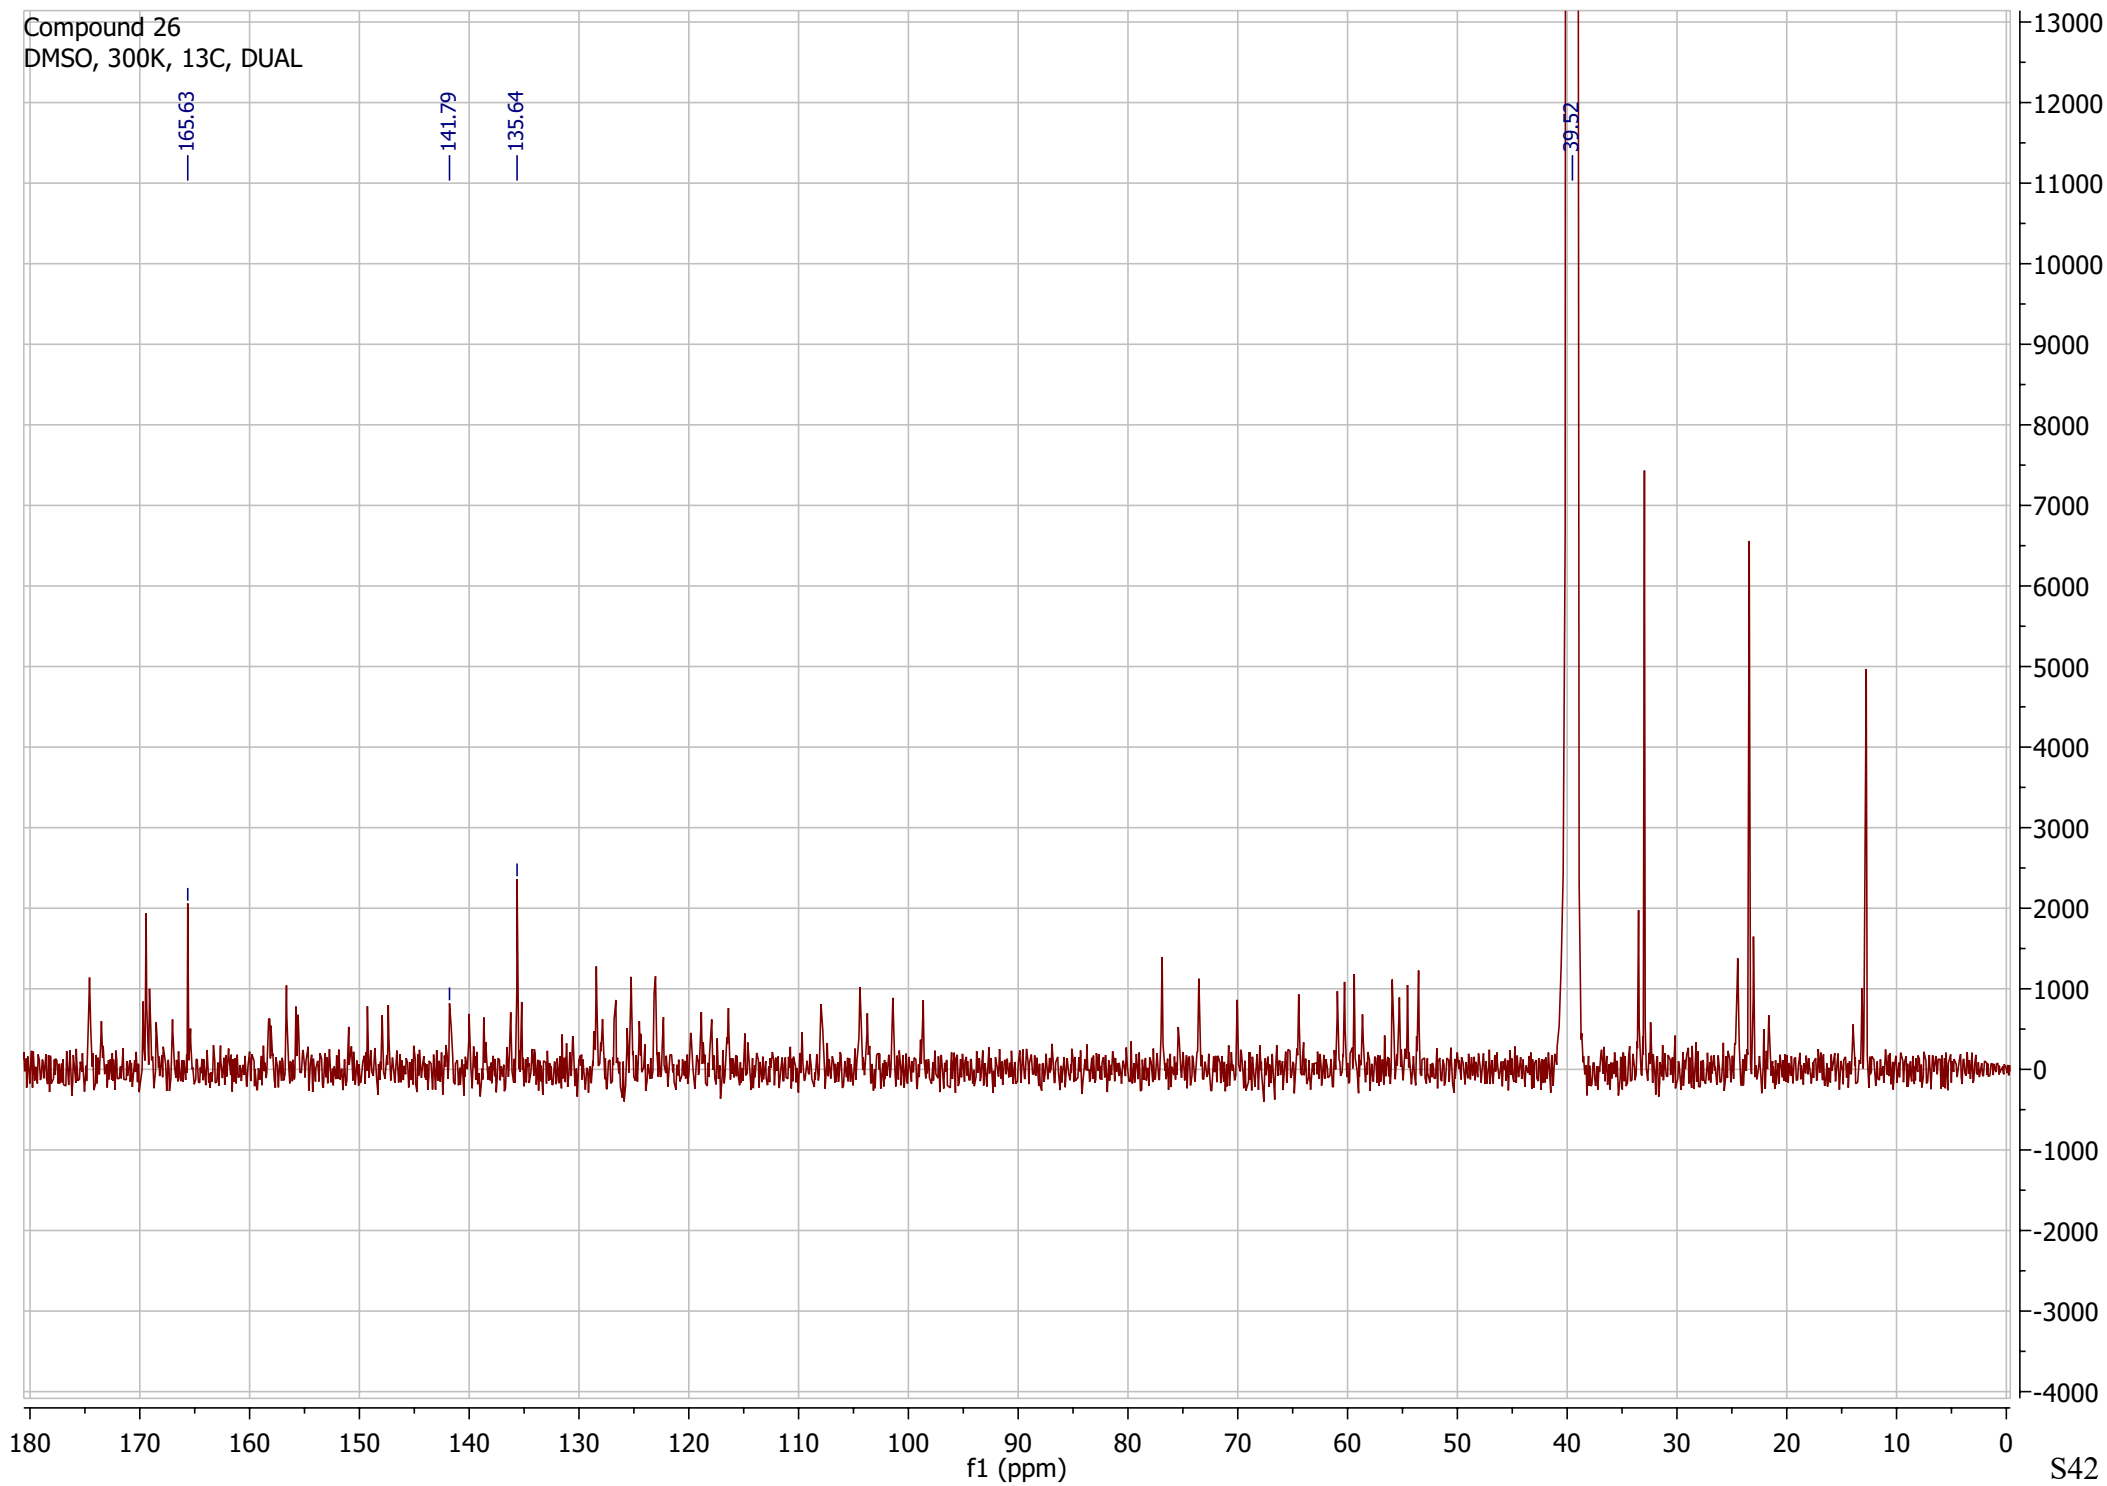

S42



Compound 27  
DMSO, 298K, 13C, TXI

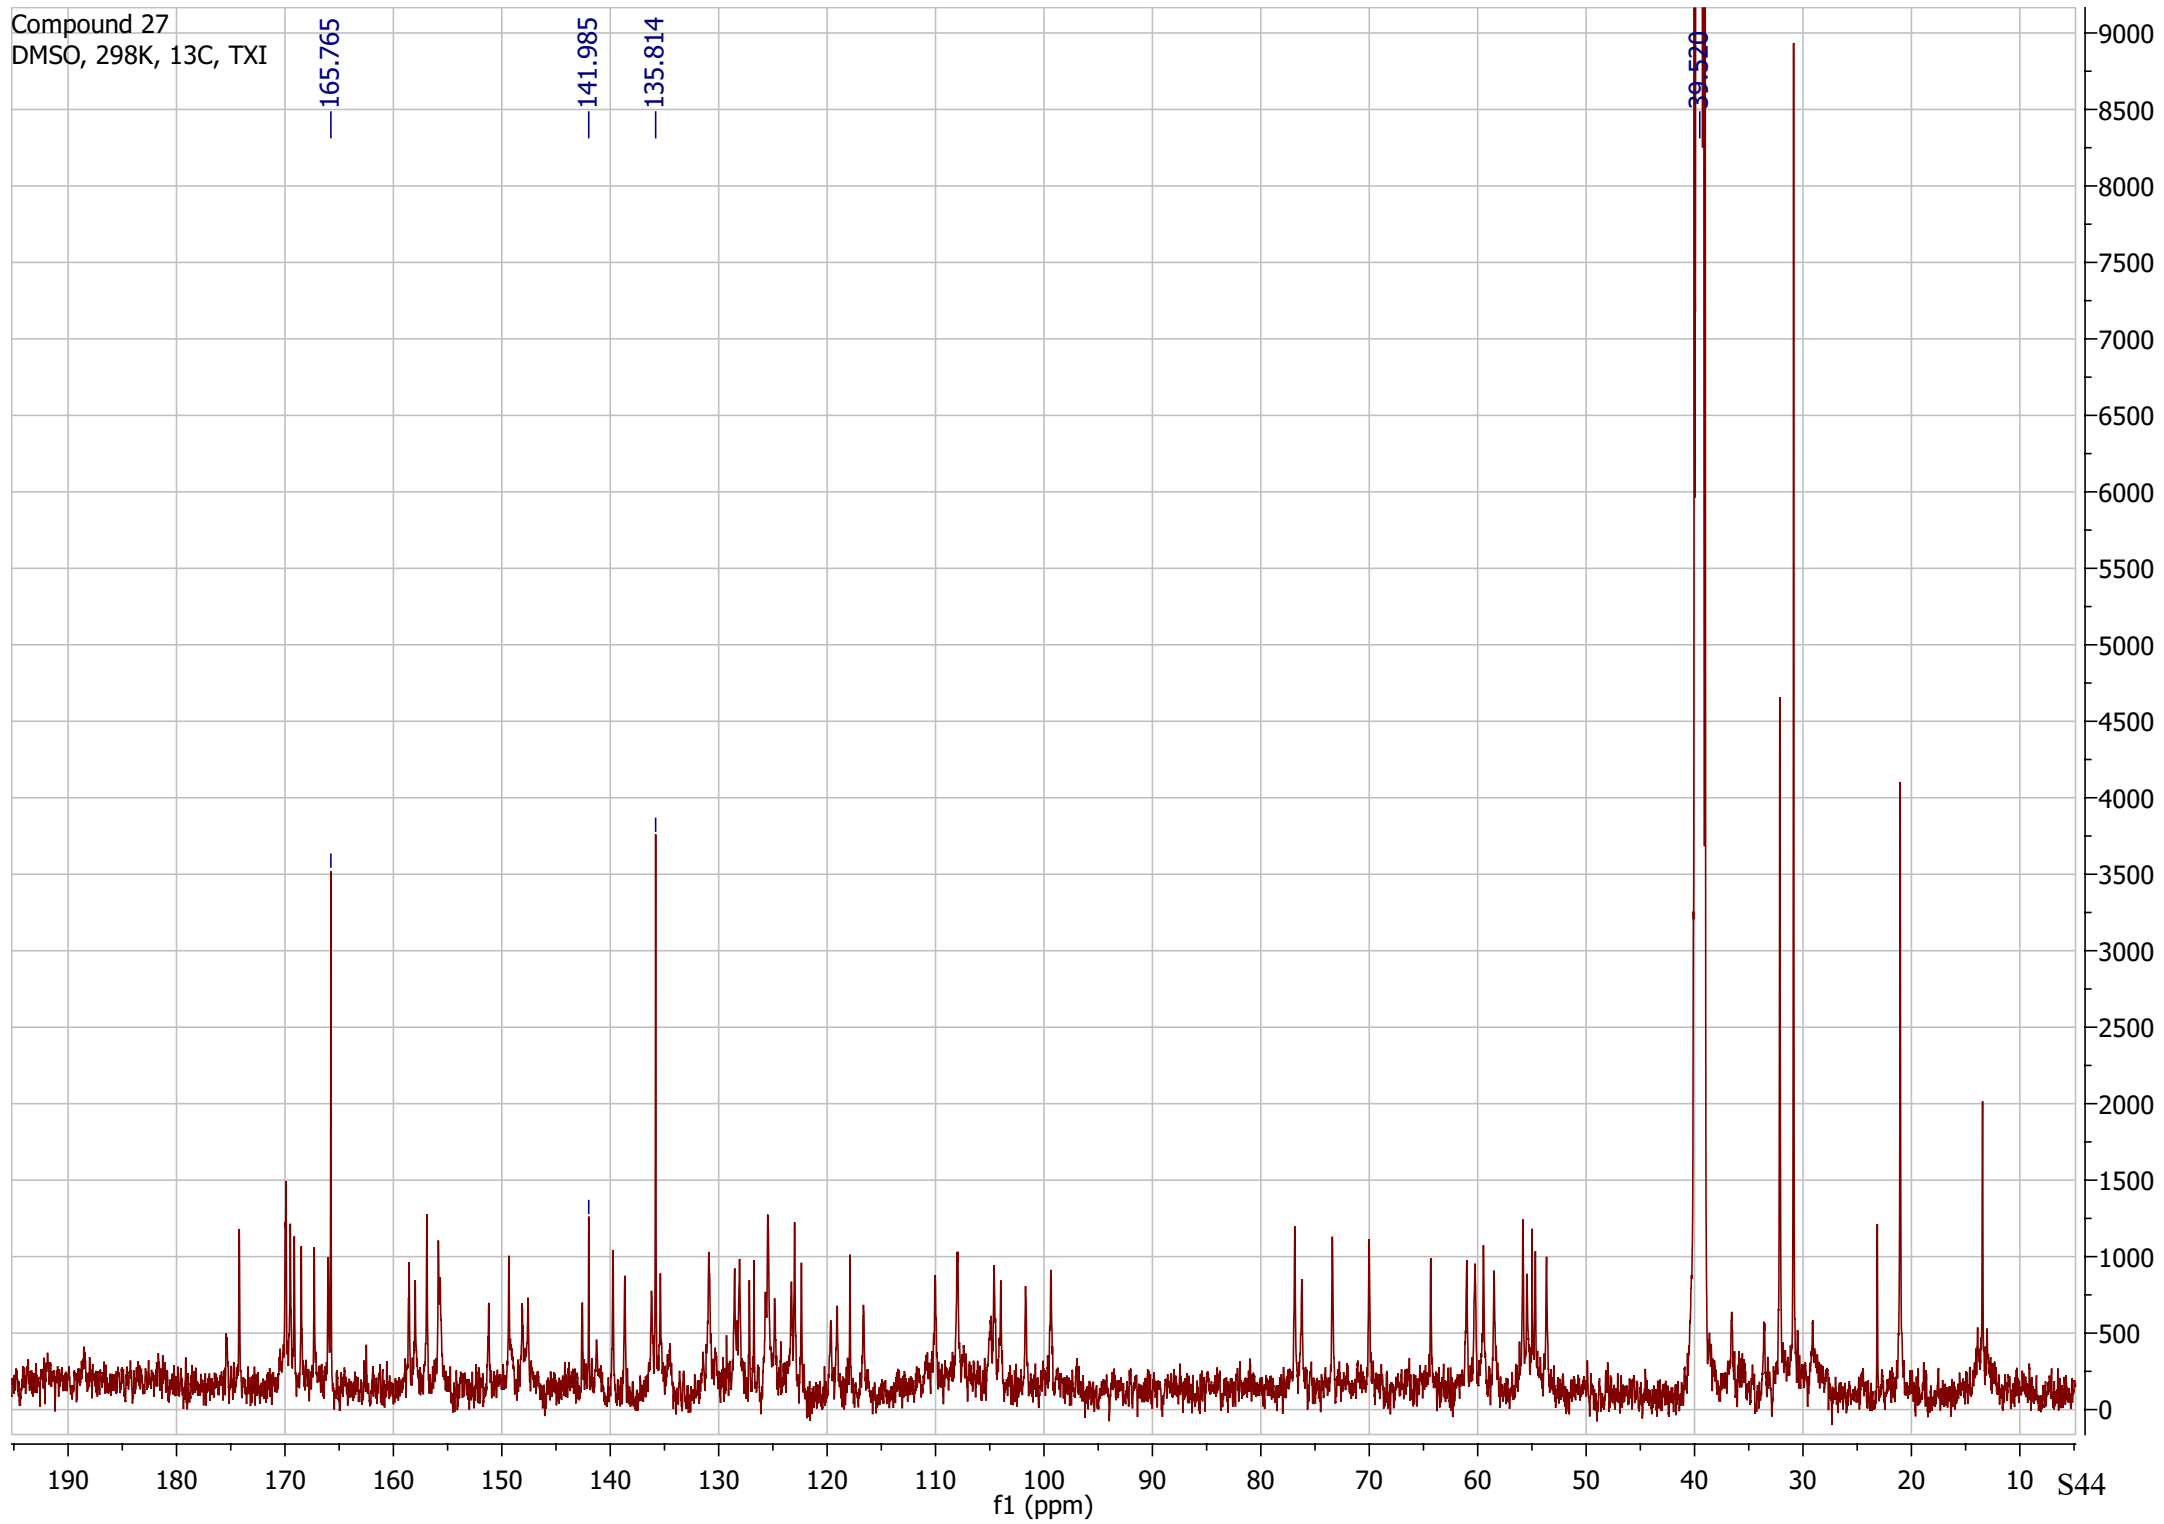



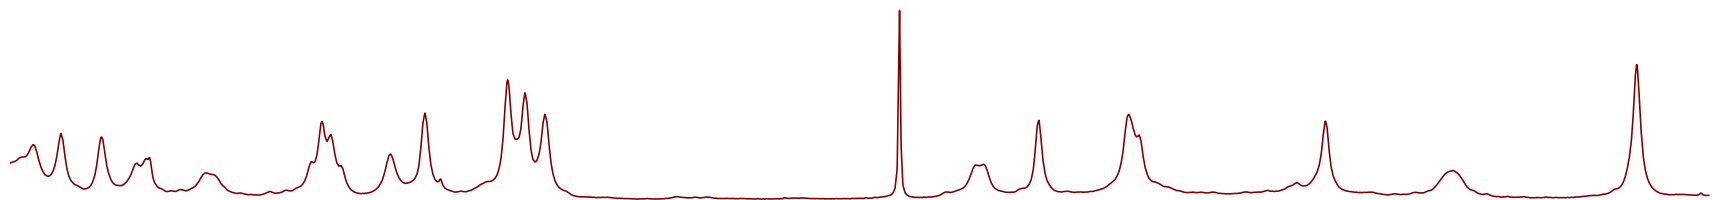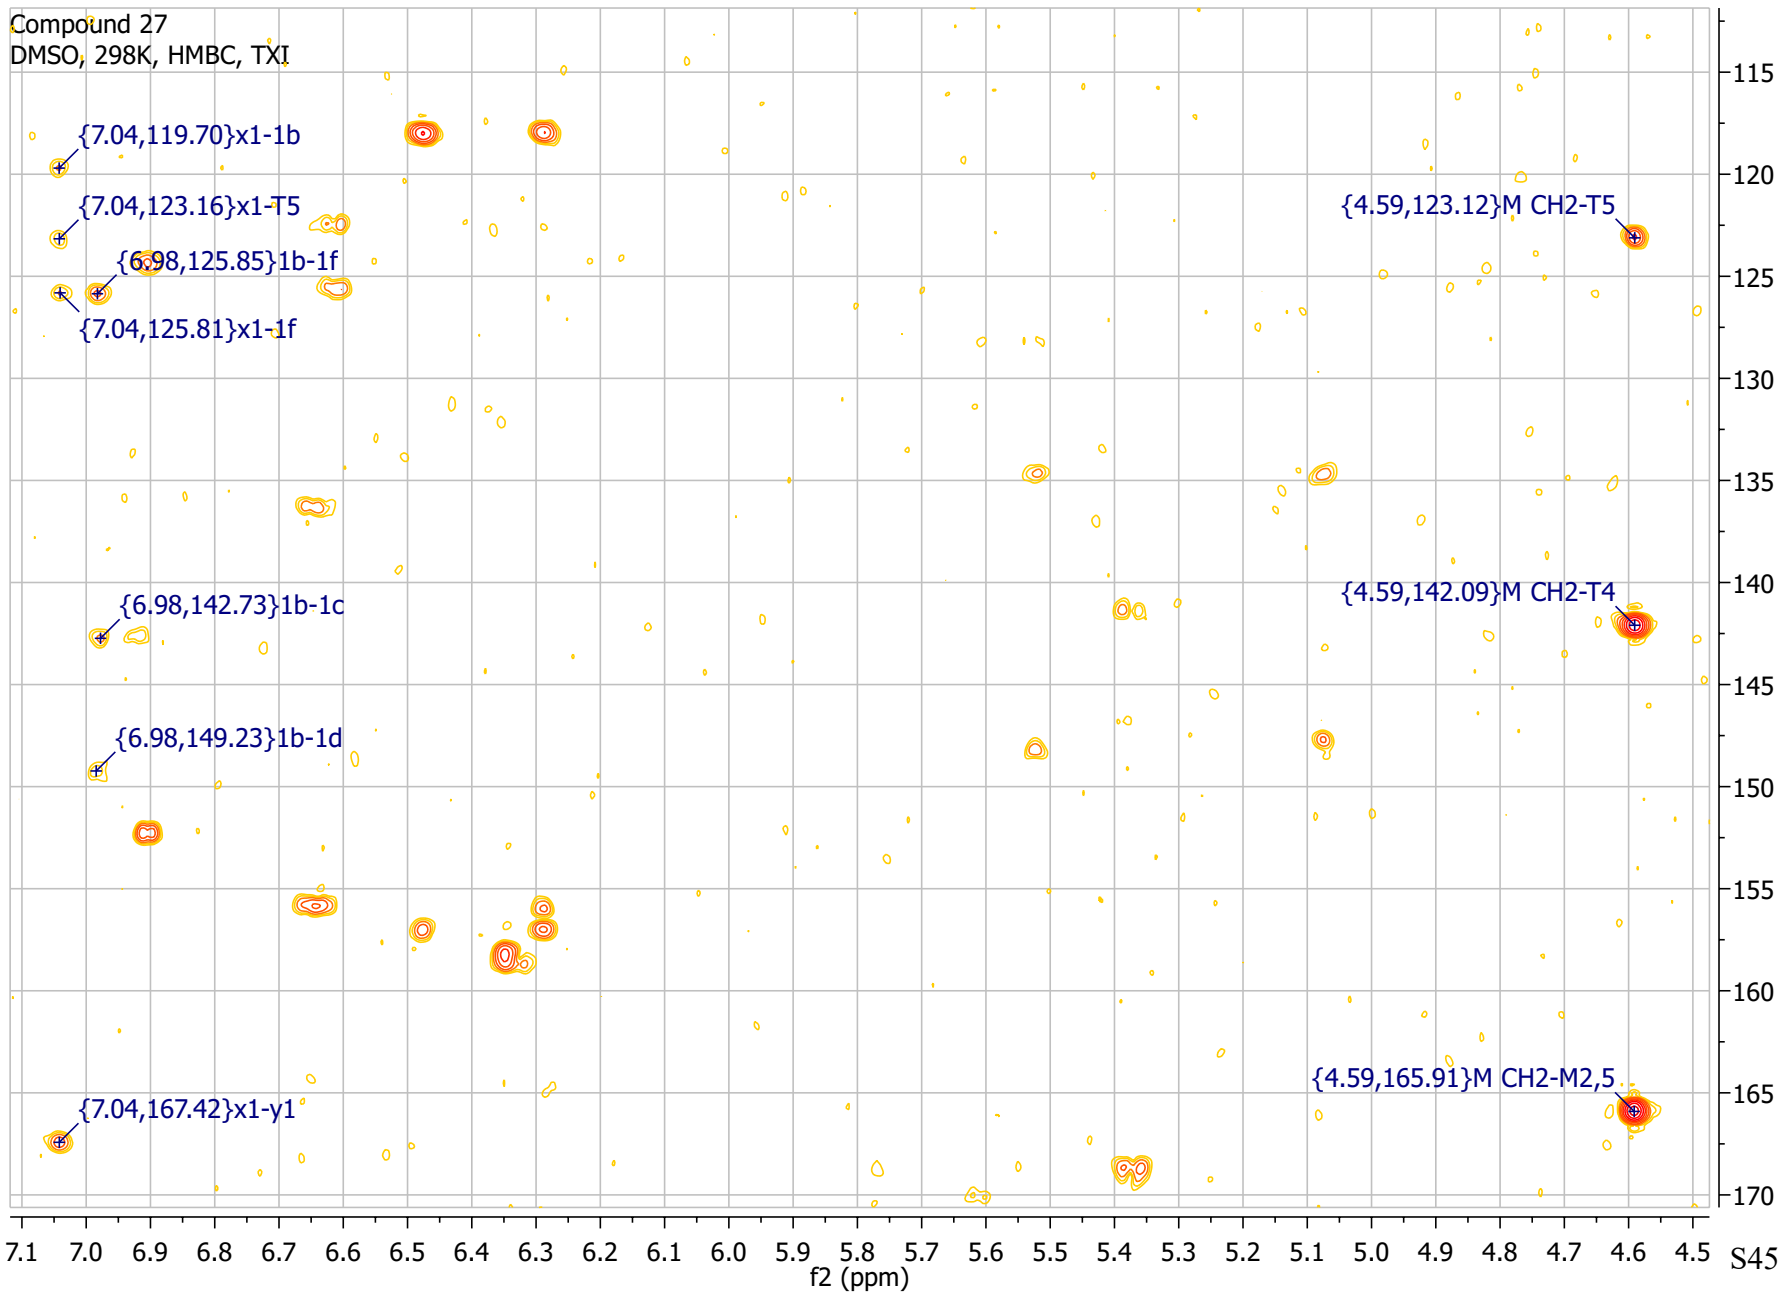

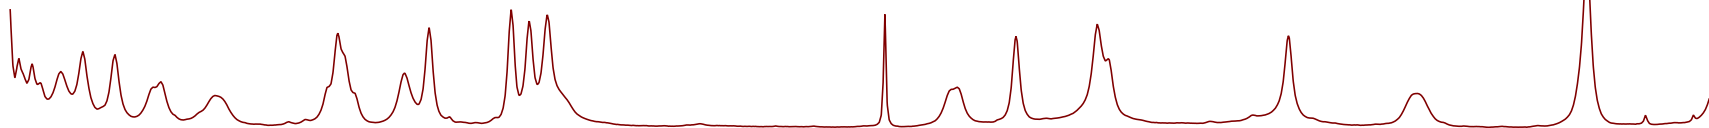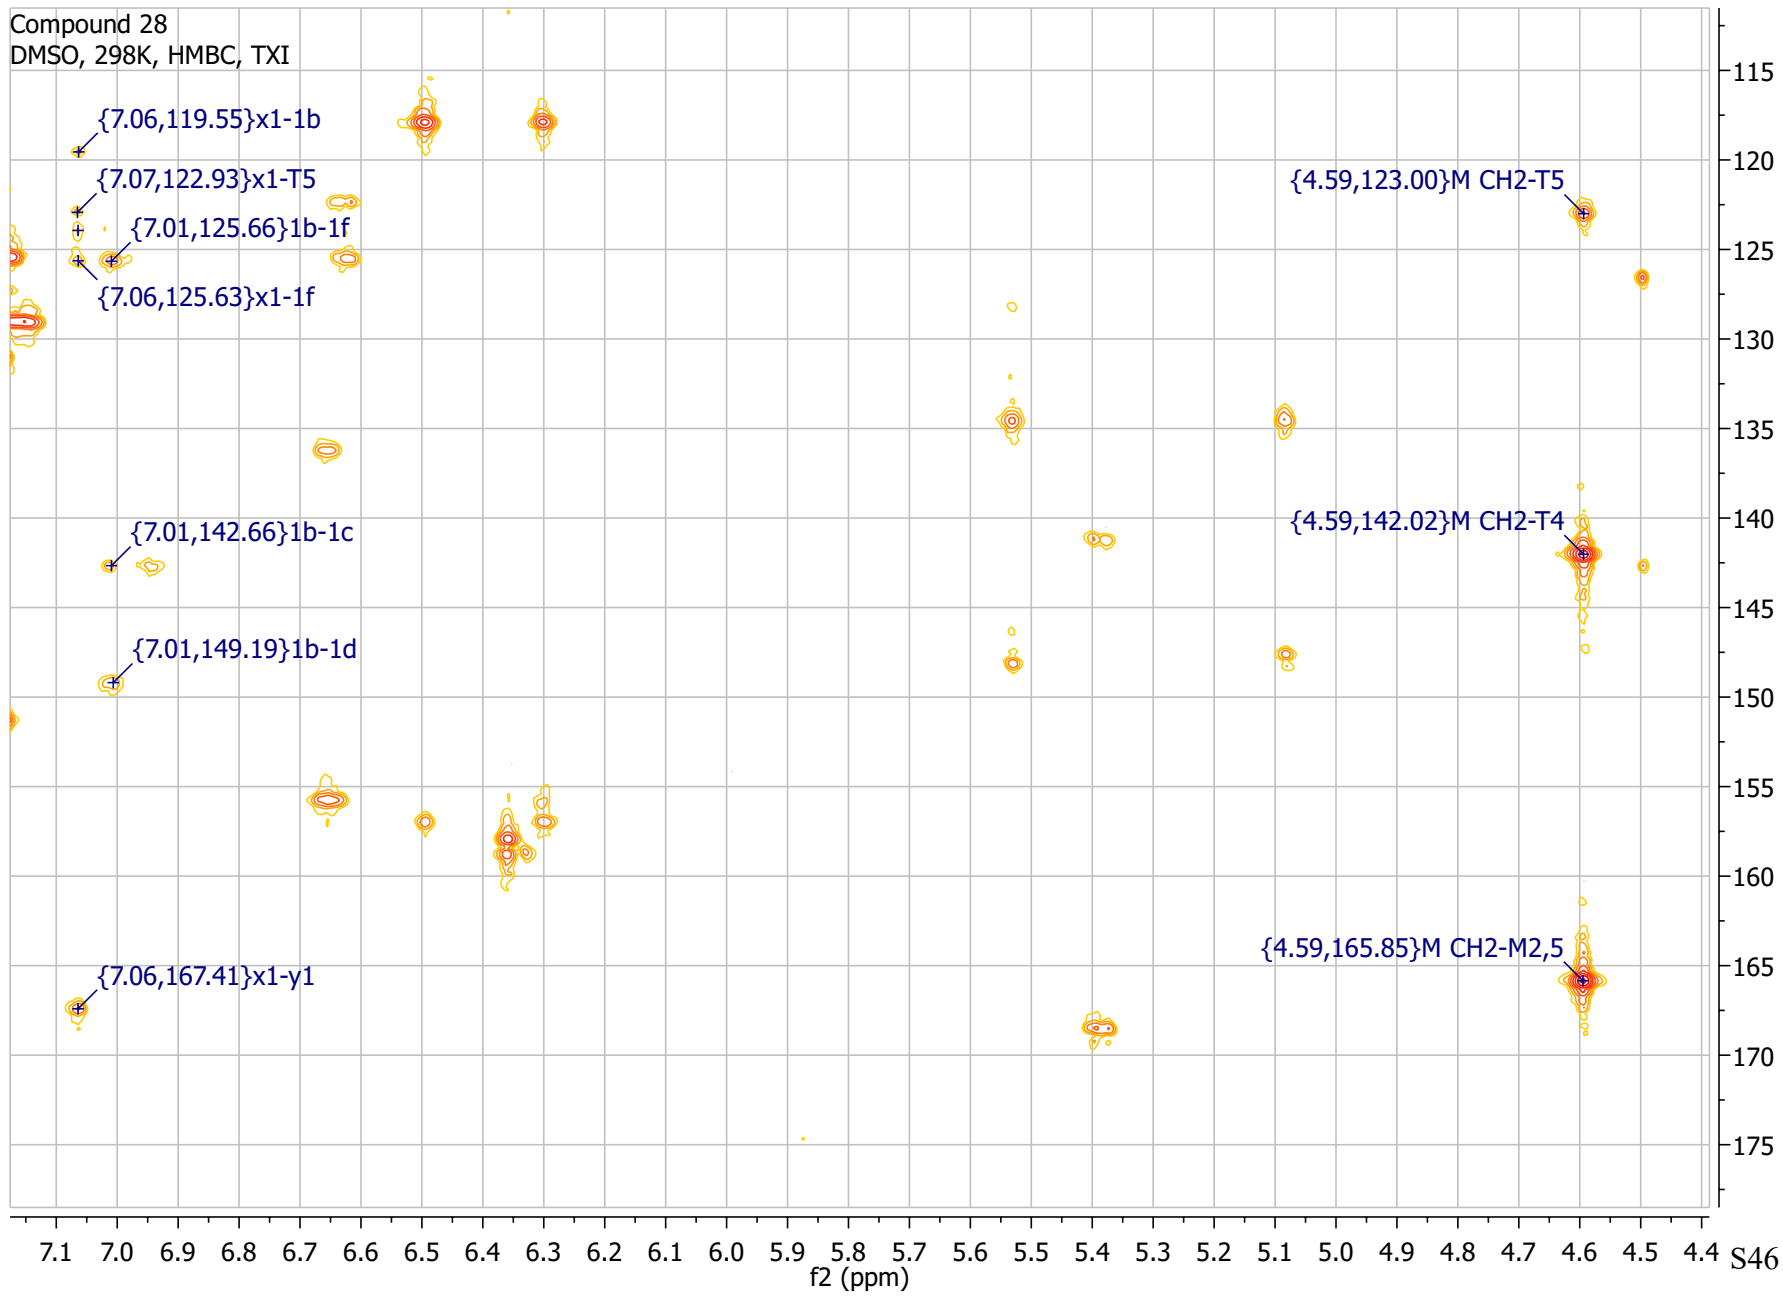

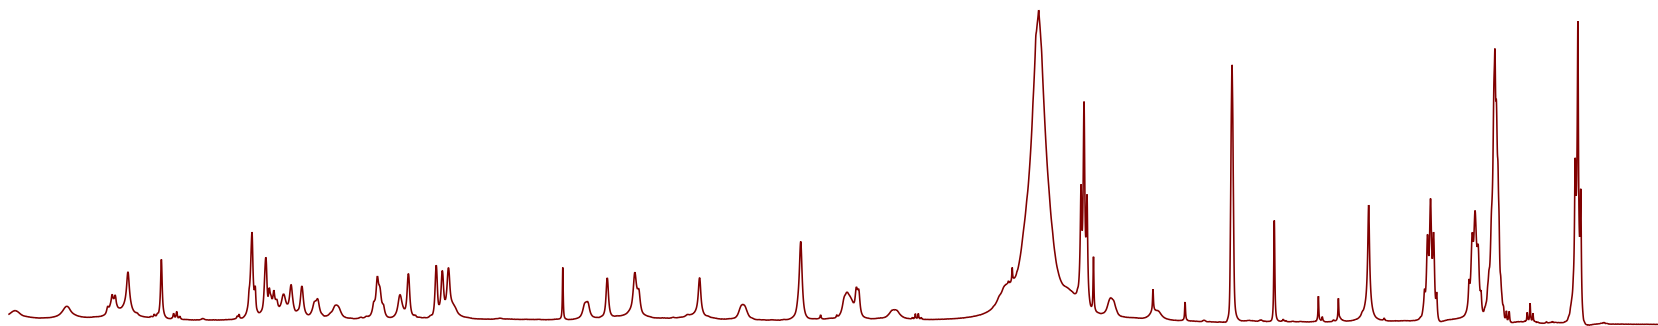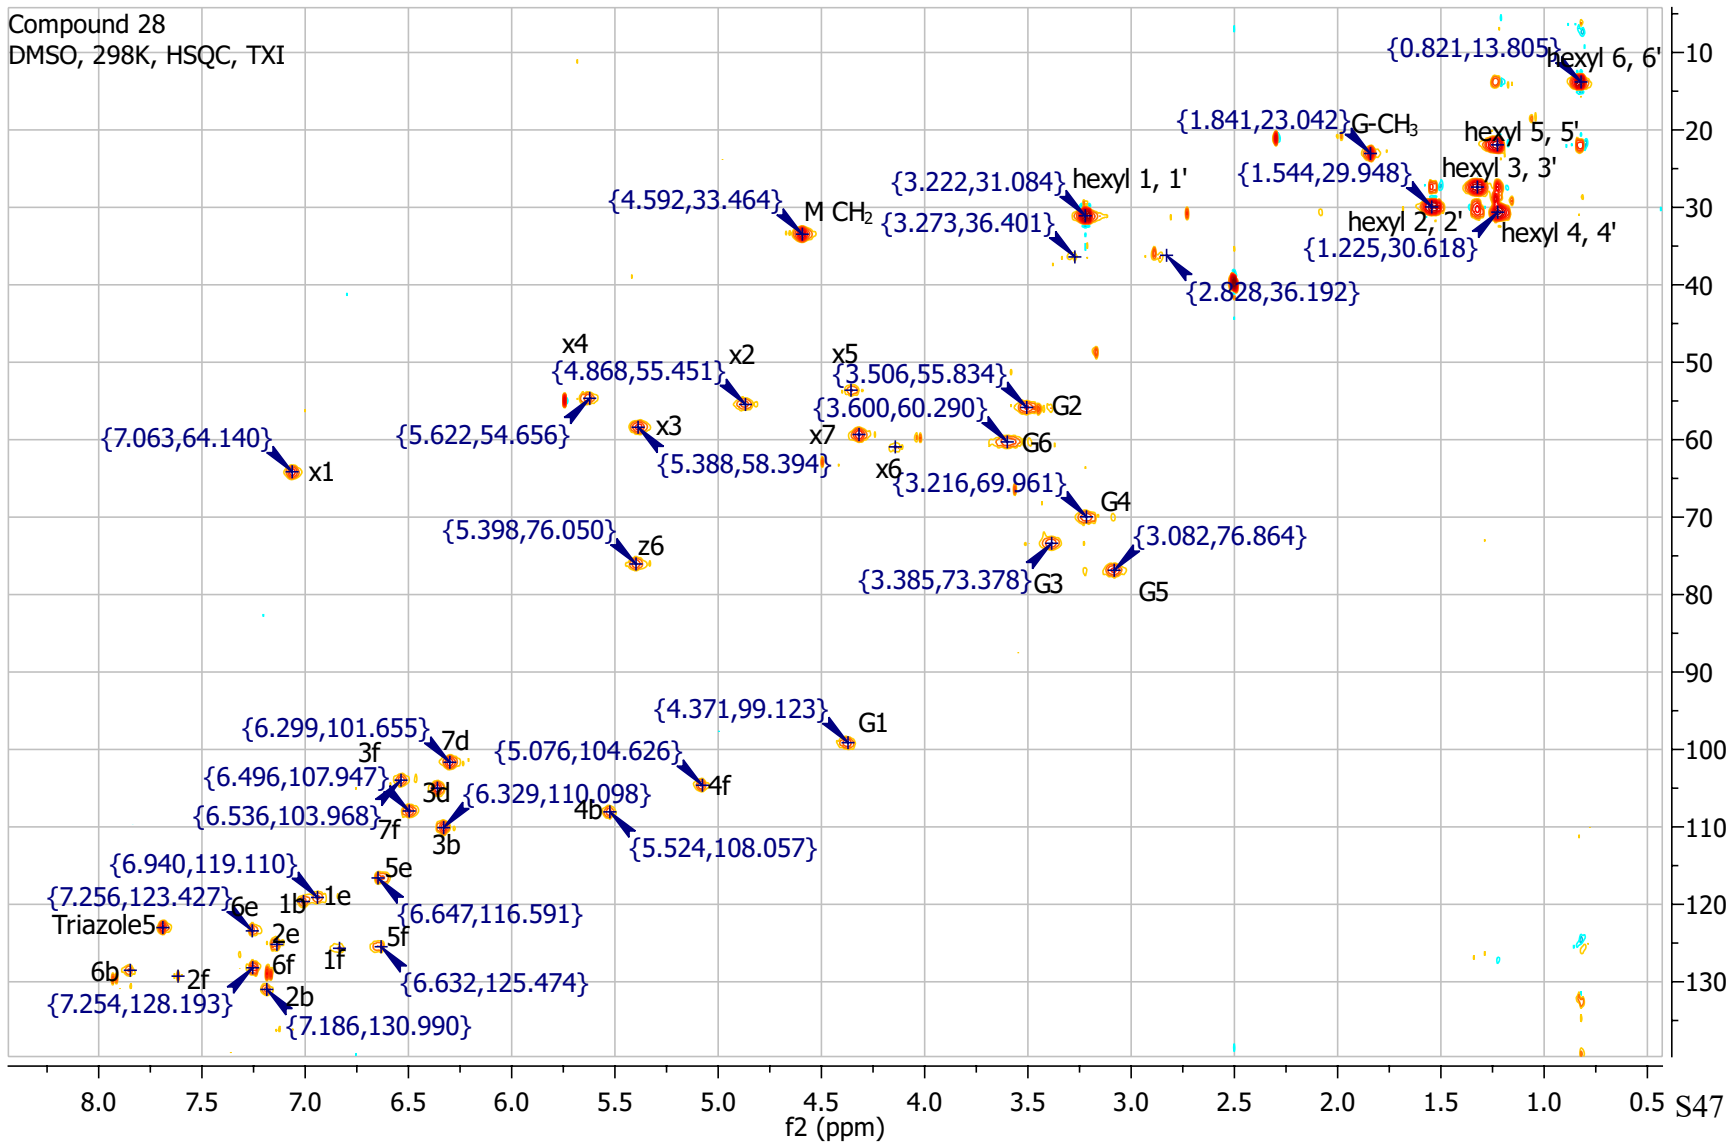

Compound 28  
DMSO, 298K, 13C, XI

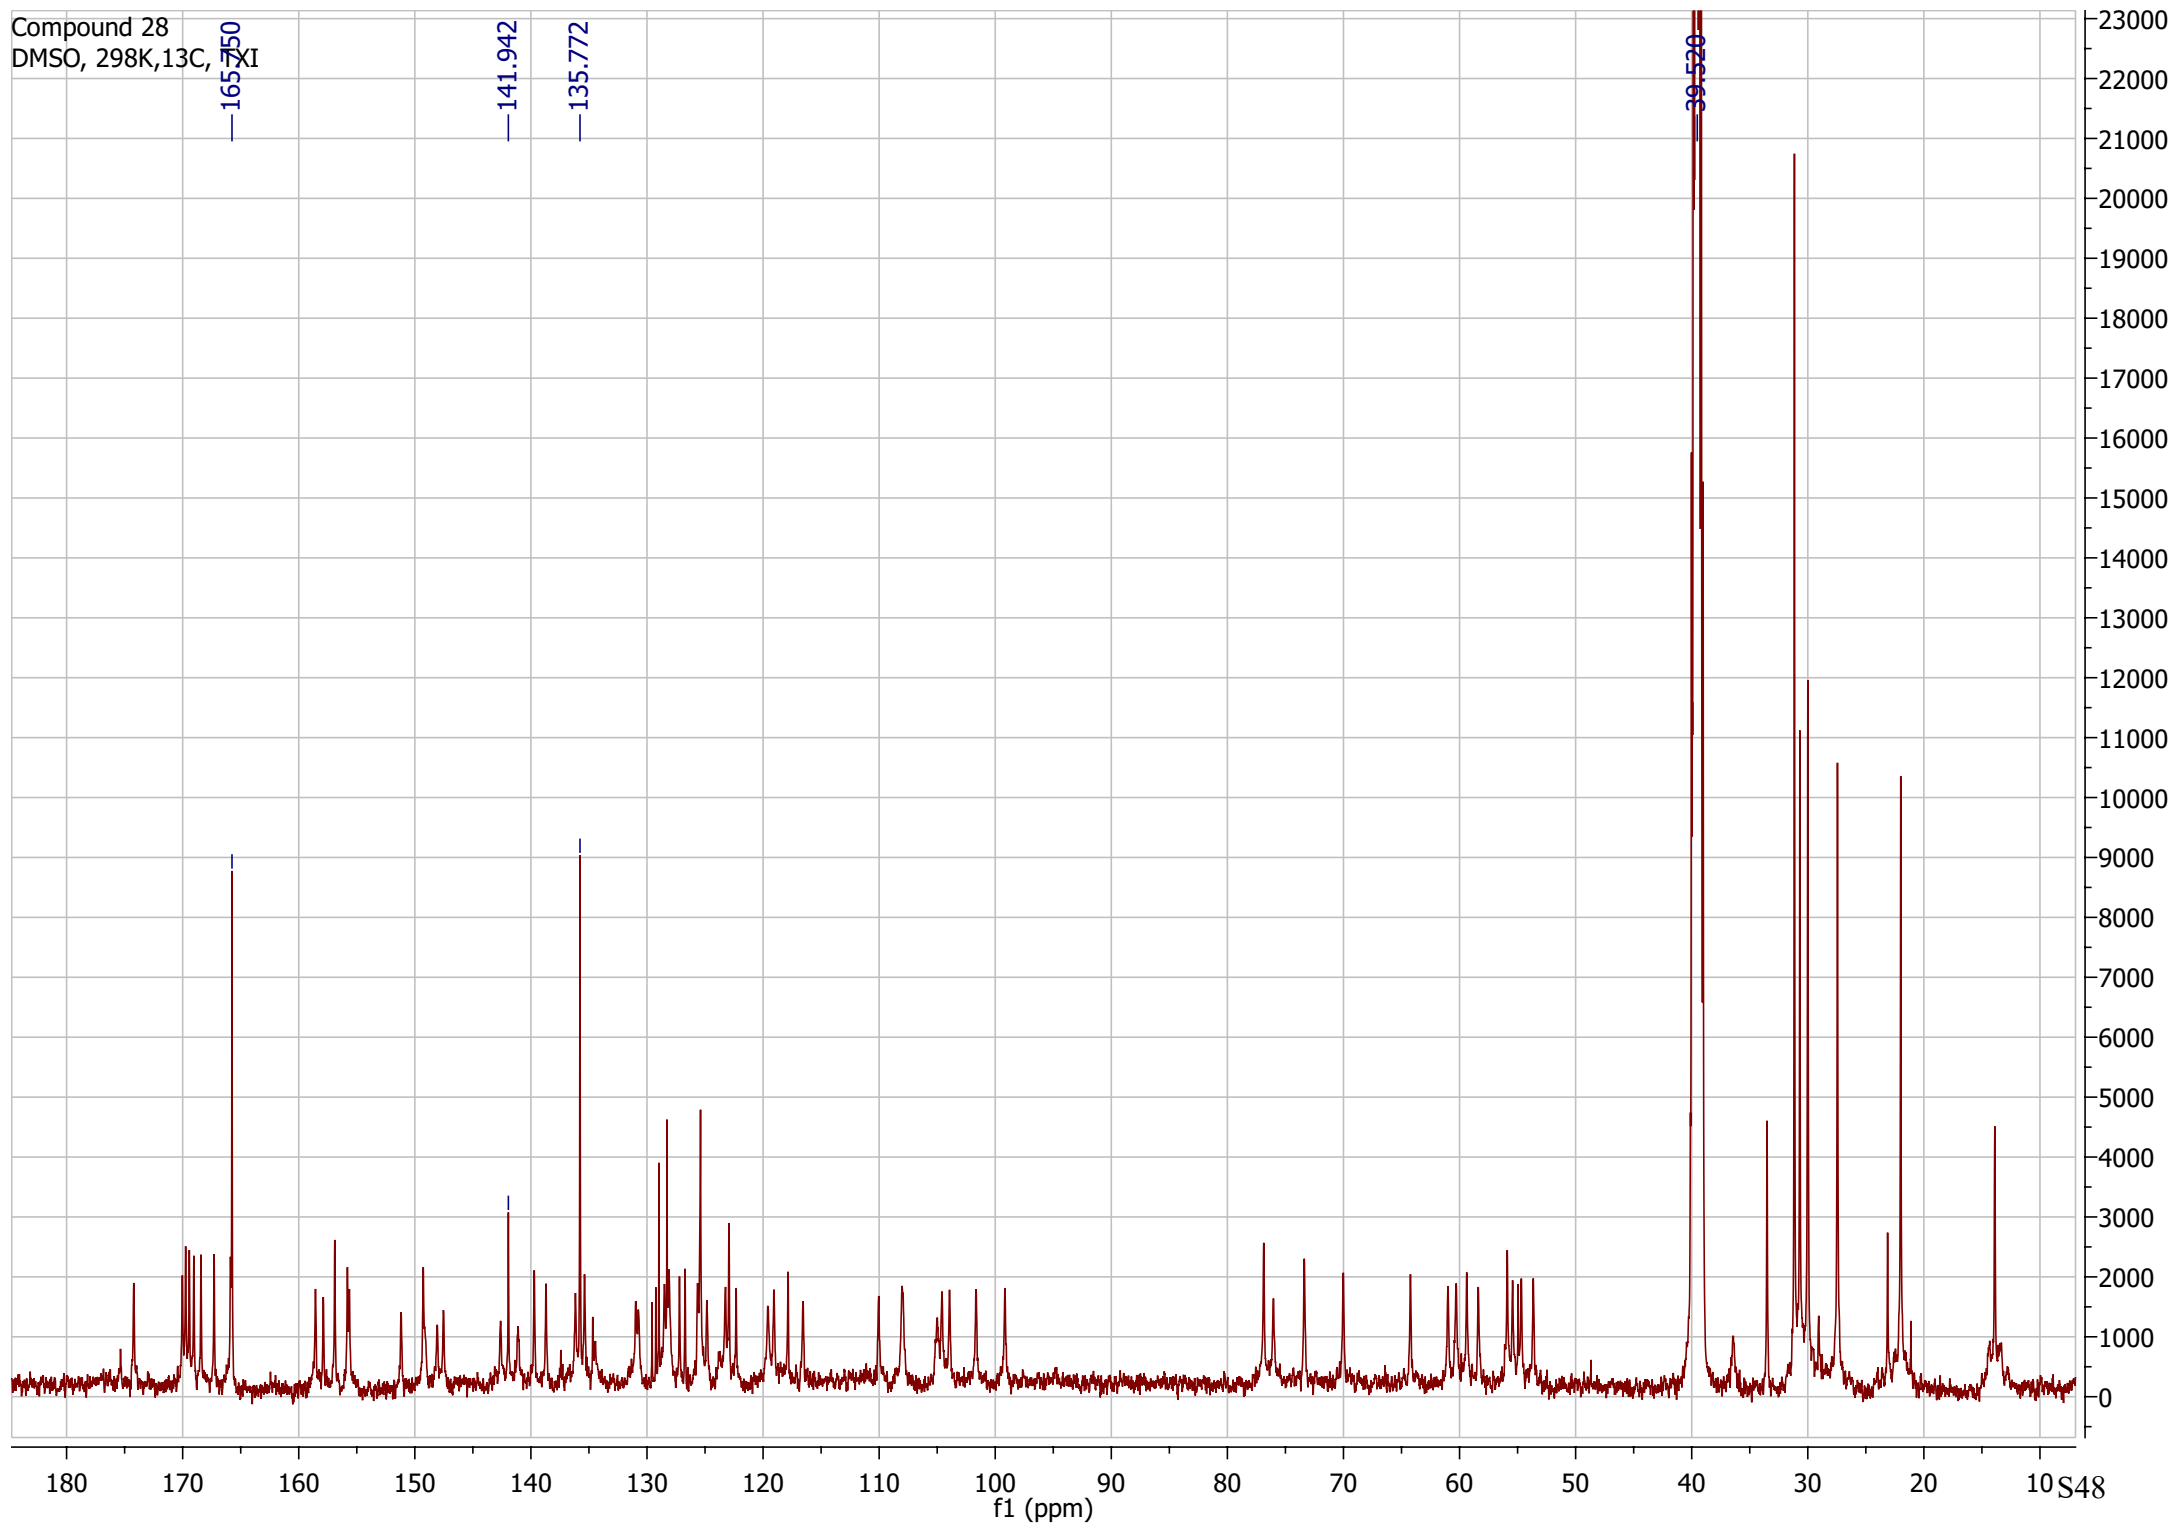

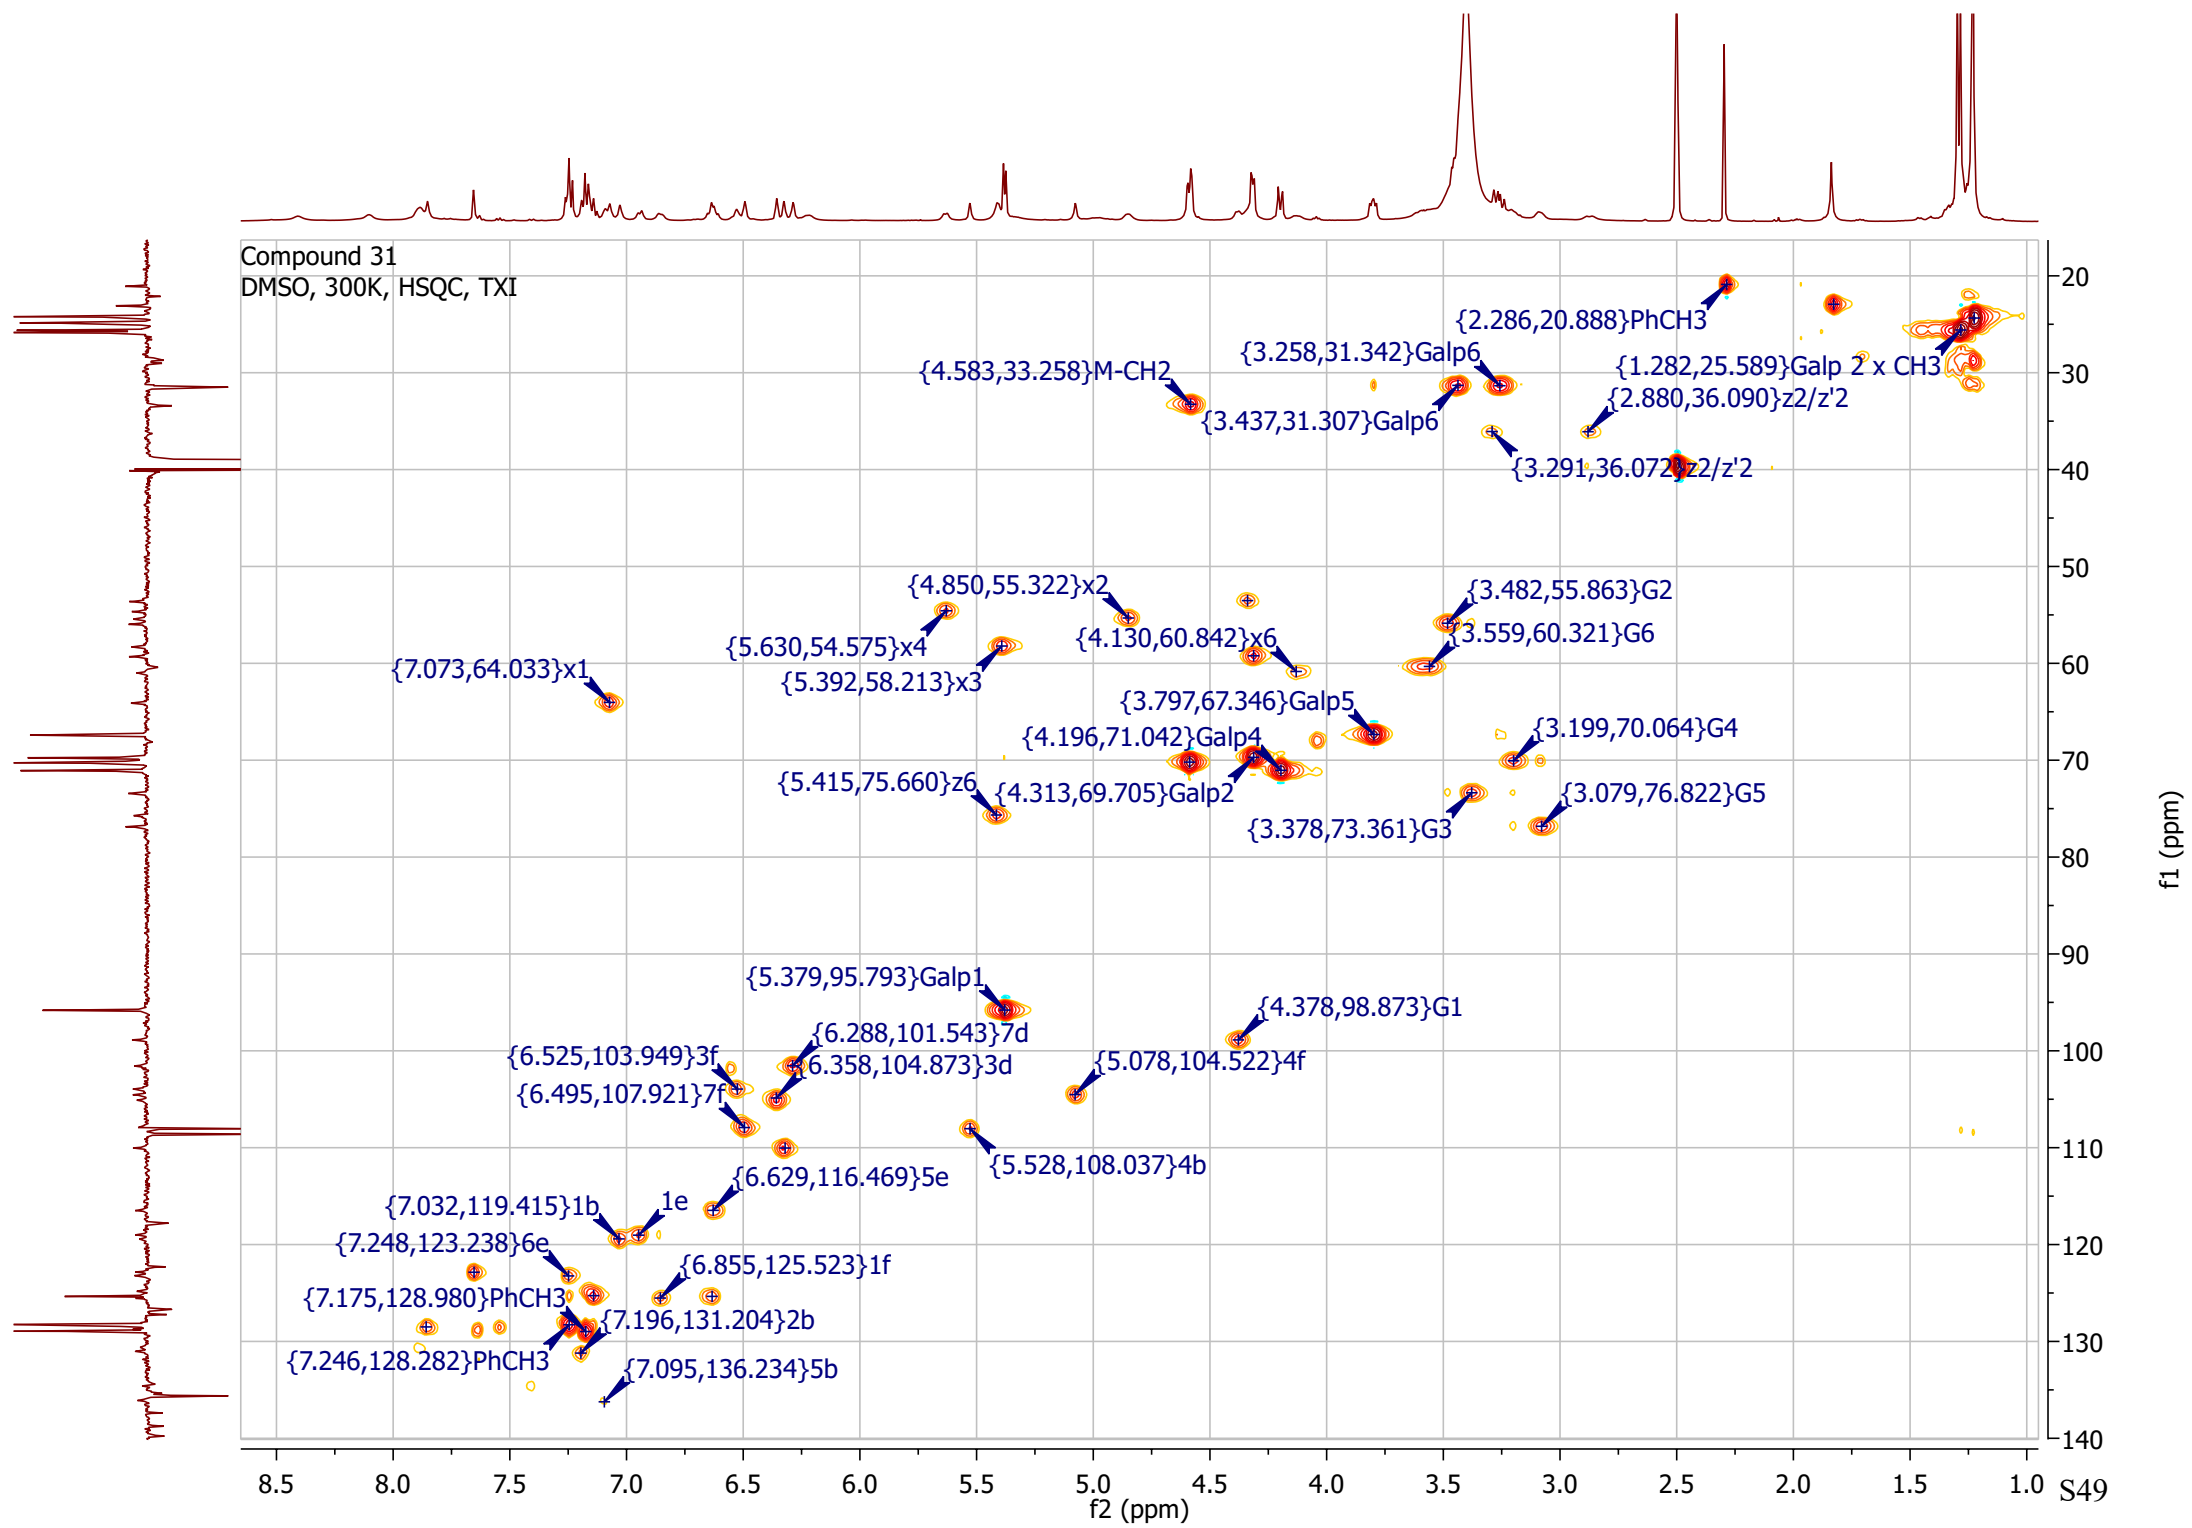

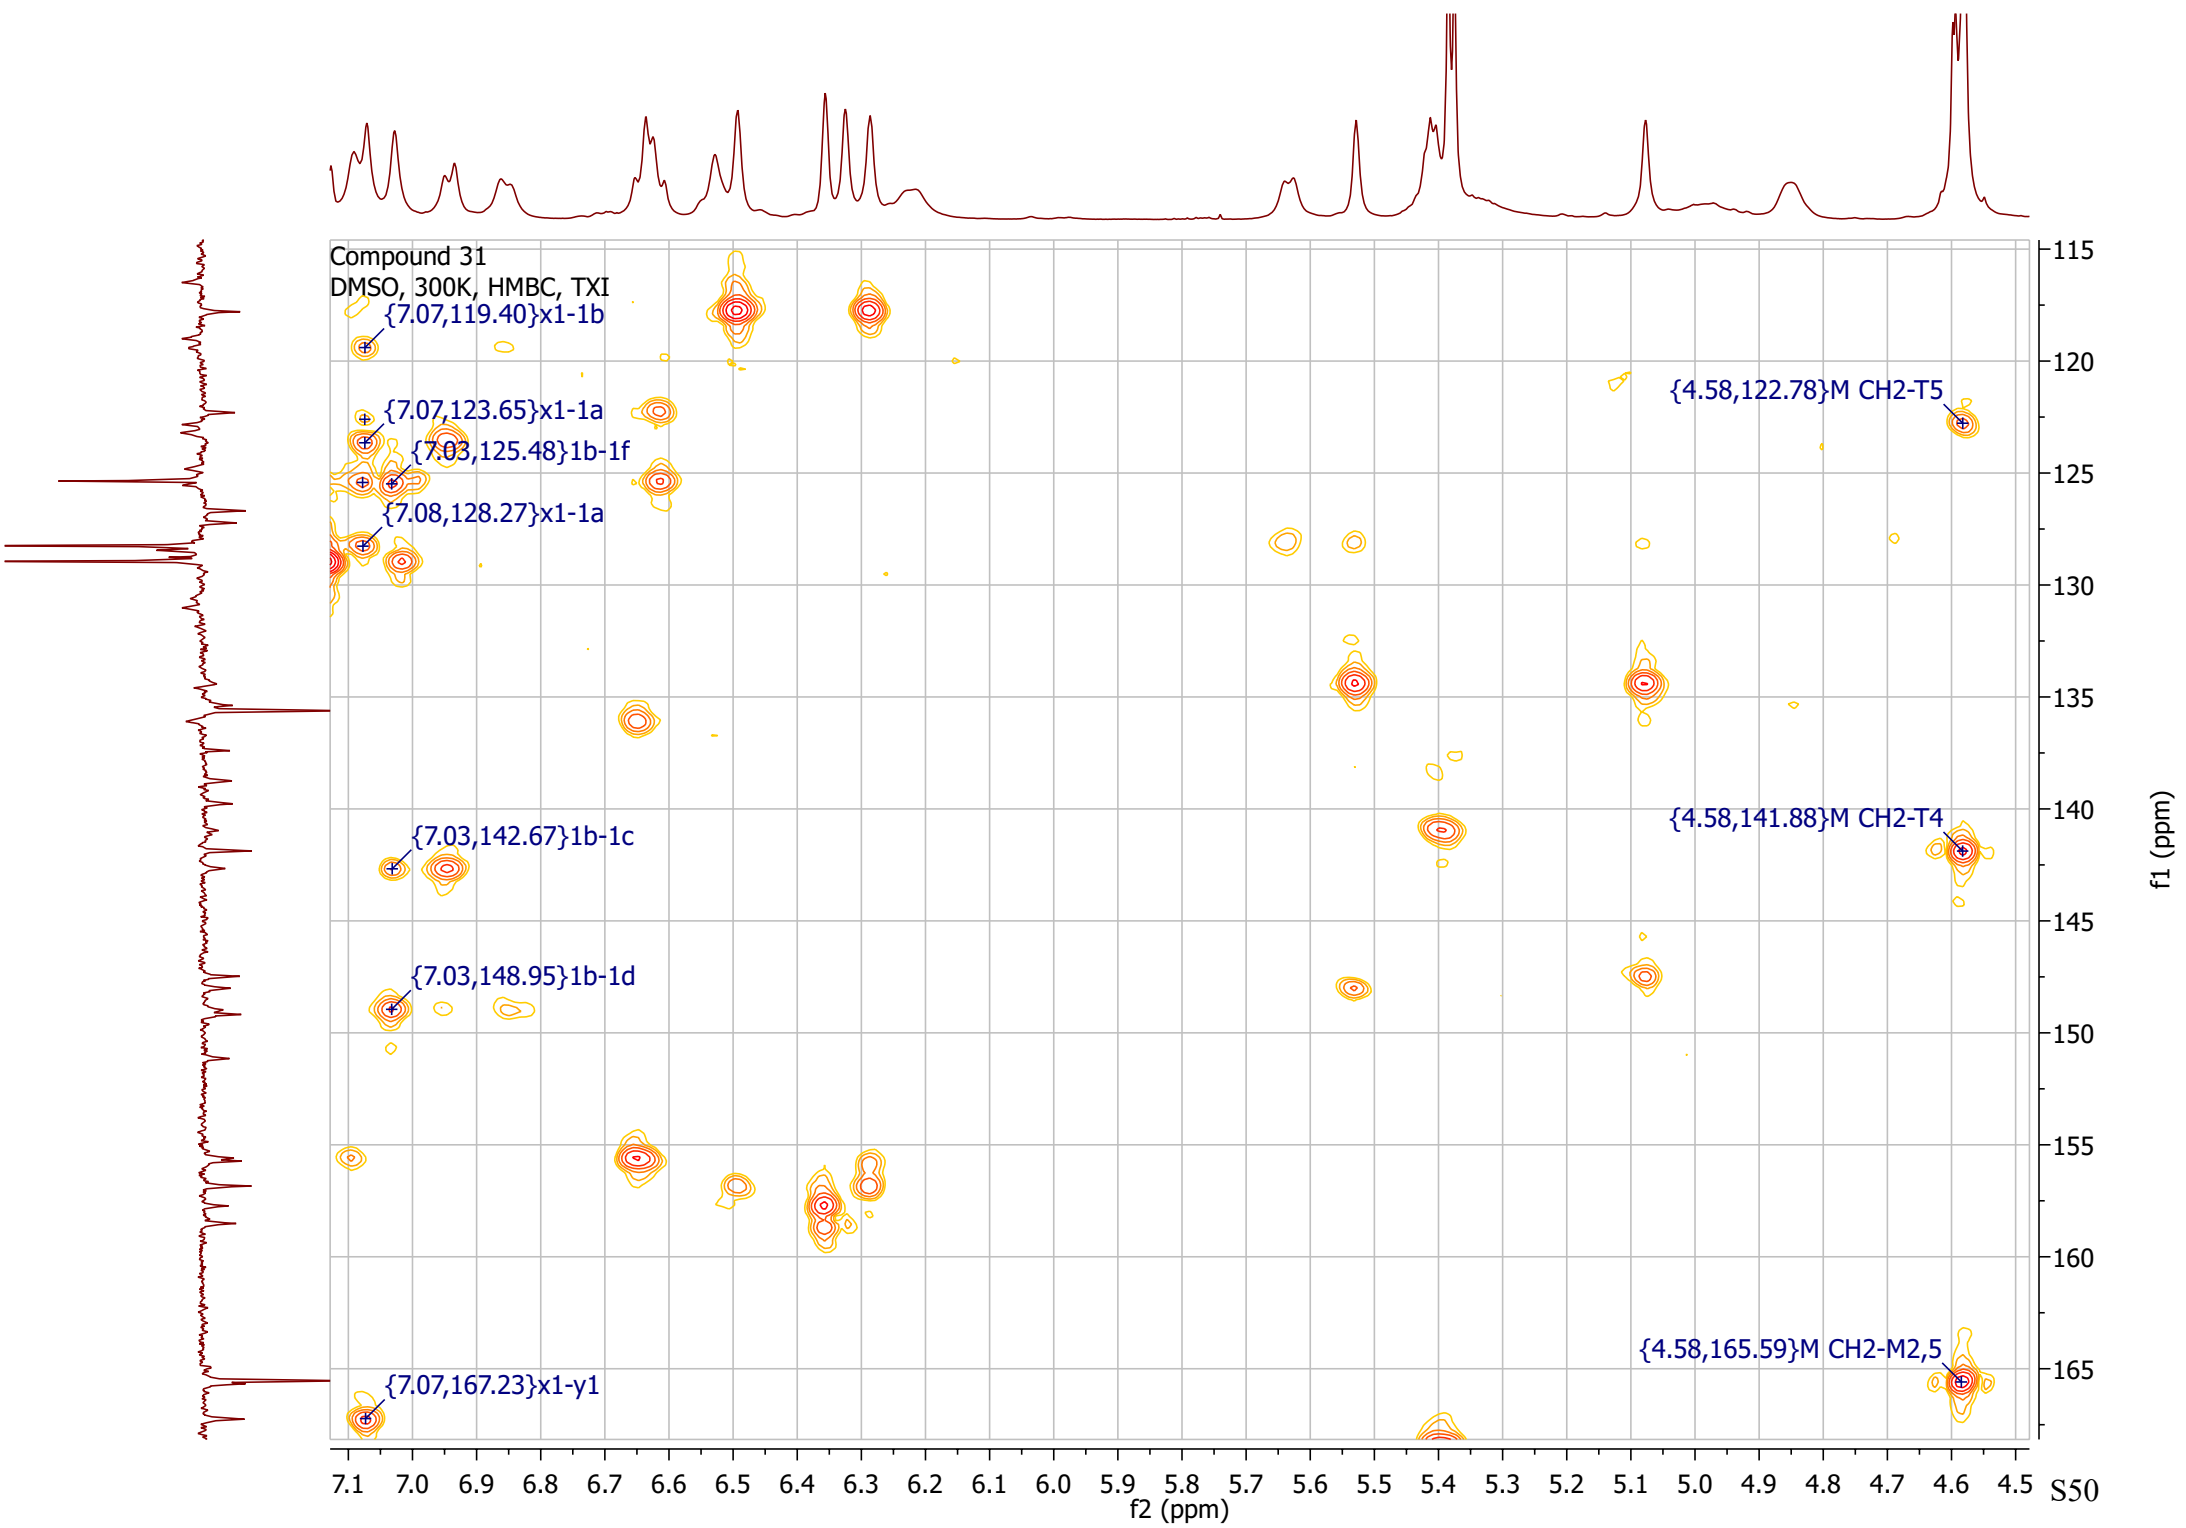

Compound 31  
DMSO, 300K, 13C, TXI

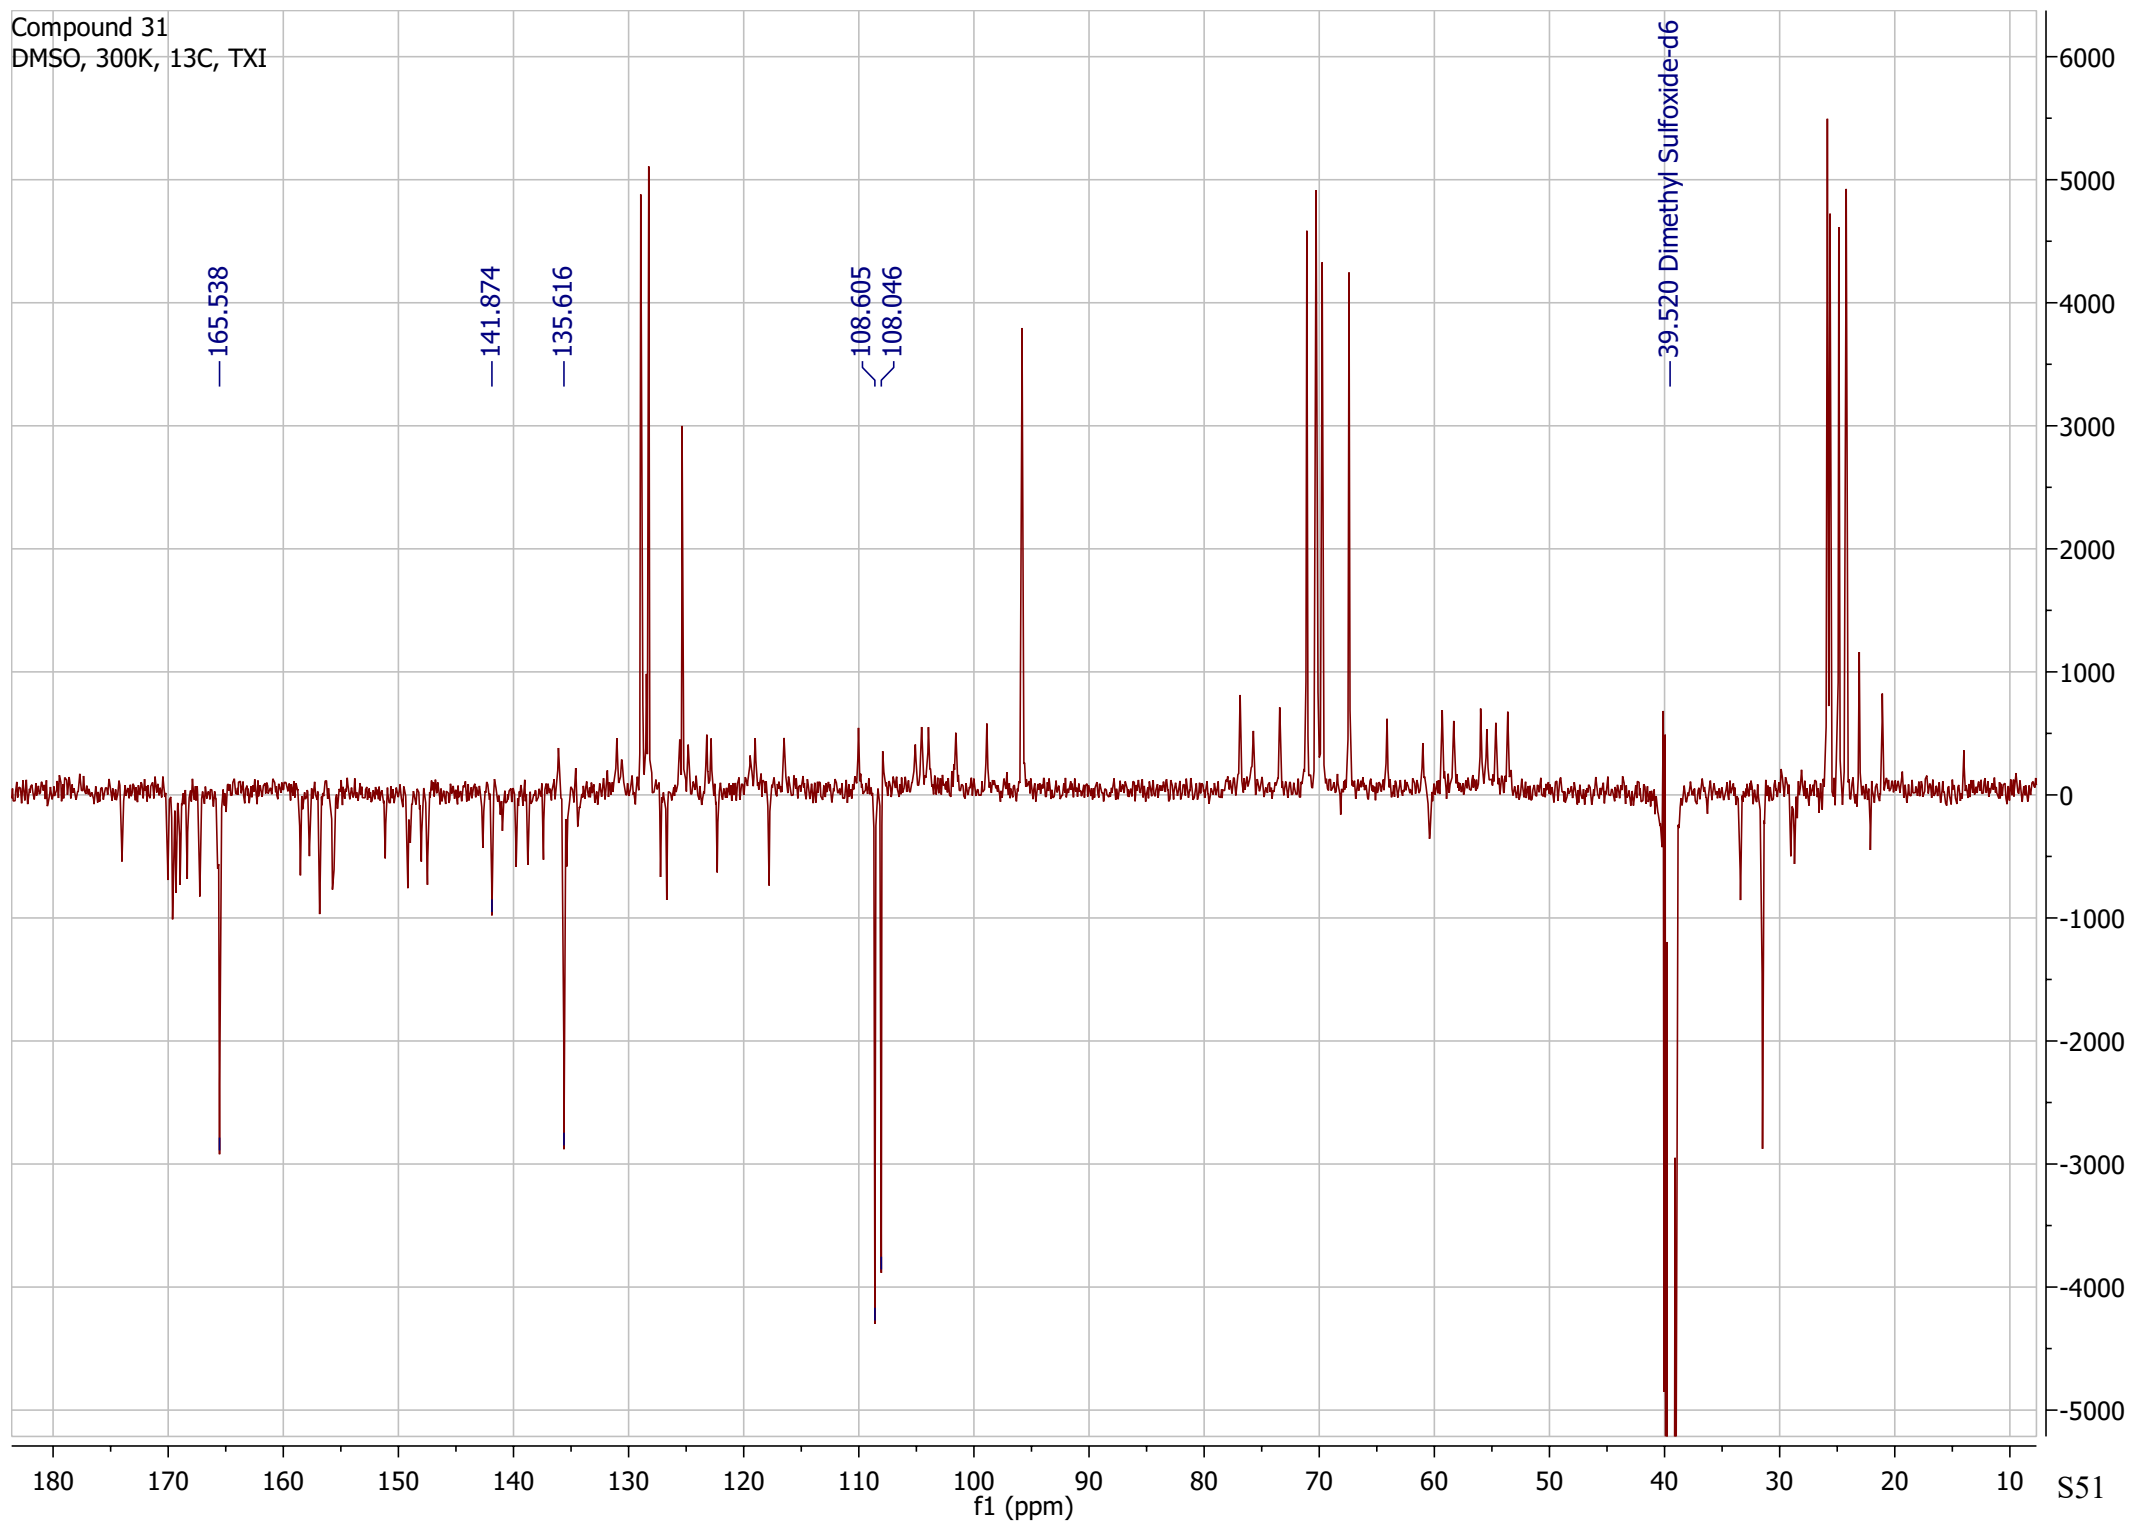

Compound 31  
DMSO, 300K, COSY, TXI

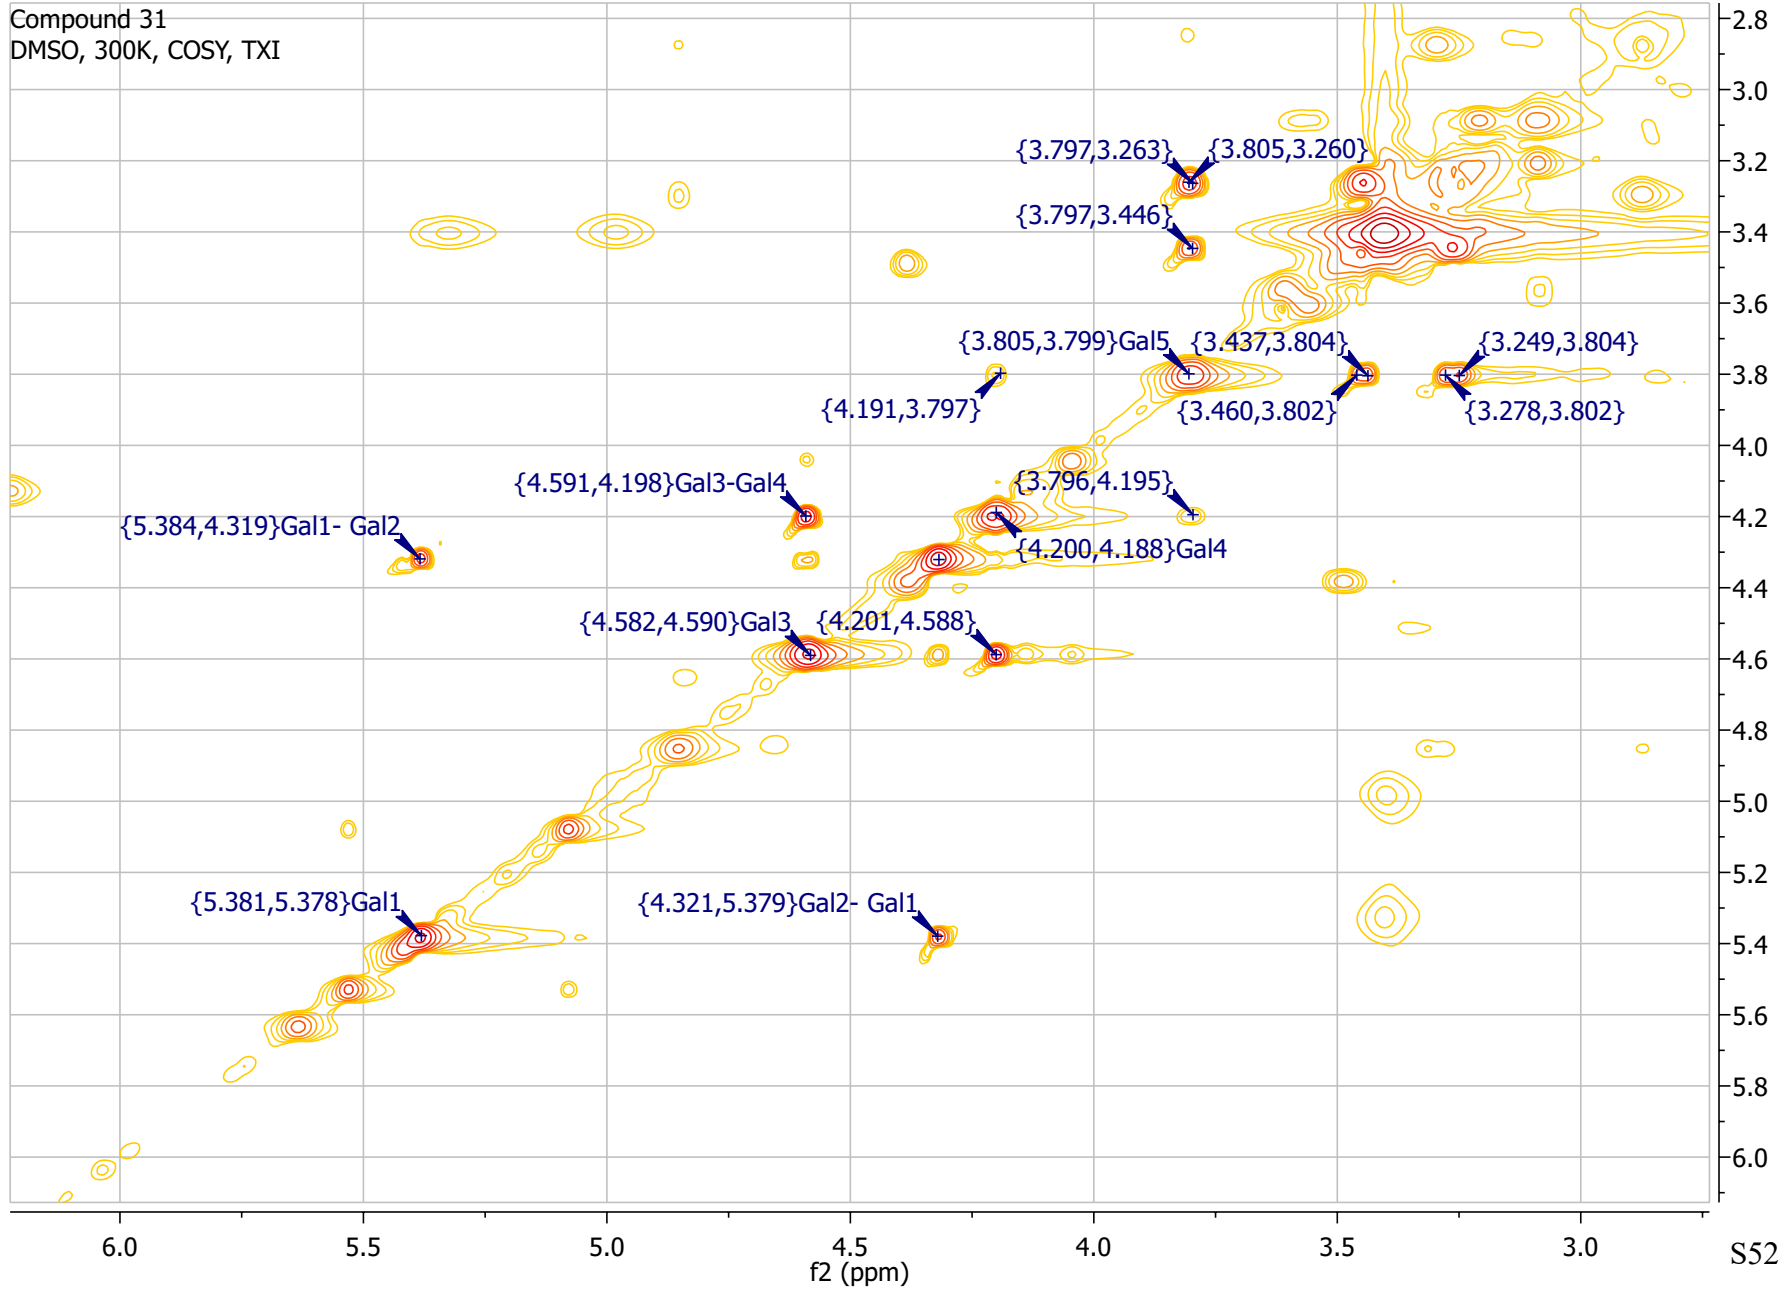

f1 (ppm)

f2 (ppm)

S52



Compound 33

<sup>1</sup>H

<sup>1</sup>H NMR (400 MHz, CDCl<sub>3</sub>) δ 4.26 – 4.14 (m, 2H), 3.76 – 3.56 (m, 16H), 3.26 (t, *J* = 7.3 Hz, 4H), 2.48 – 2.41 (m, 1H), 1.75 – 1.61 (m, 4H), 1.03 (t, *J* = 7.3 Hz, 6H).

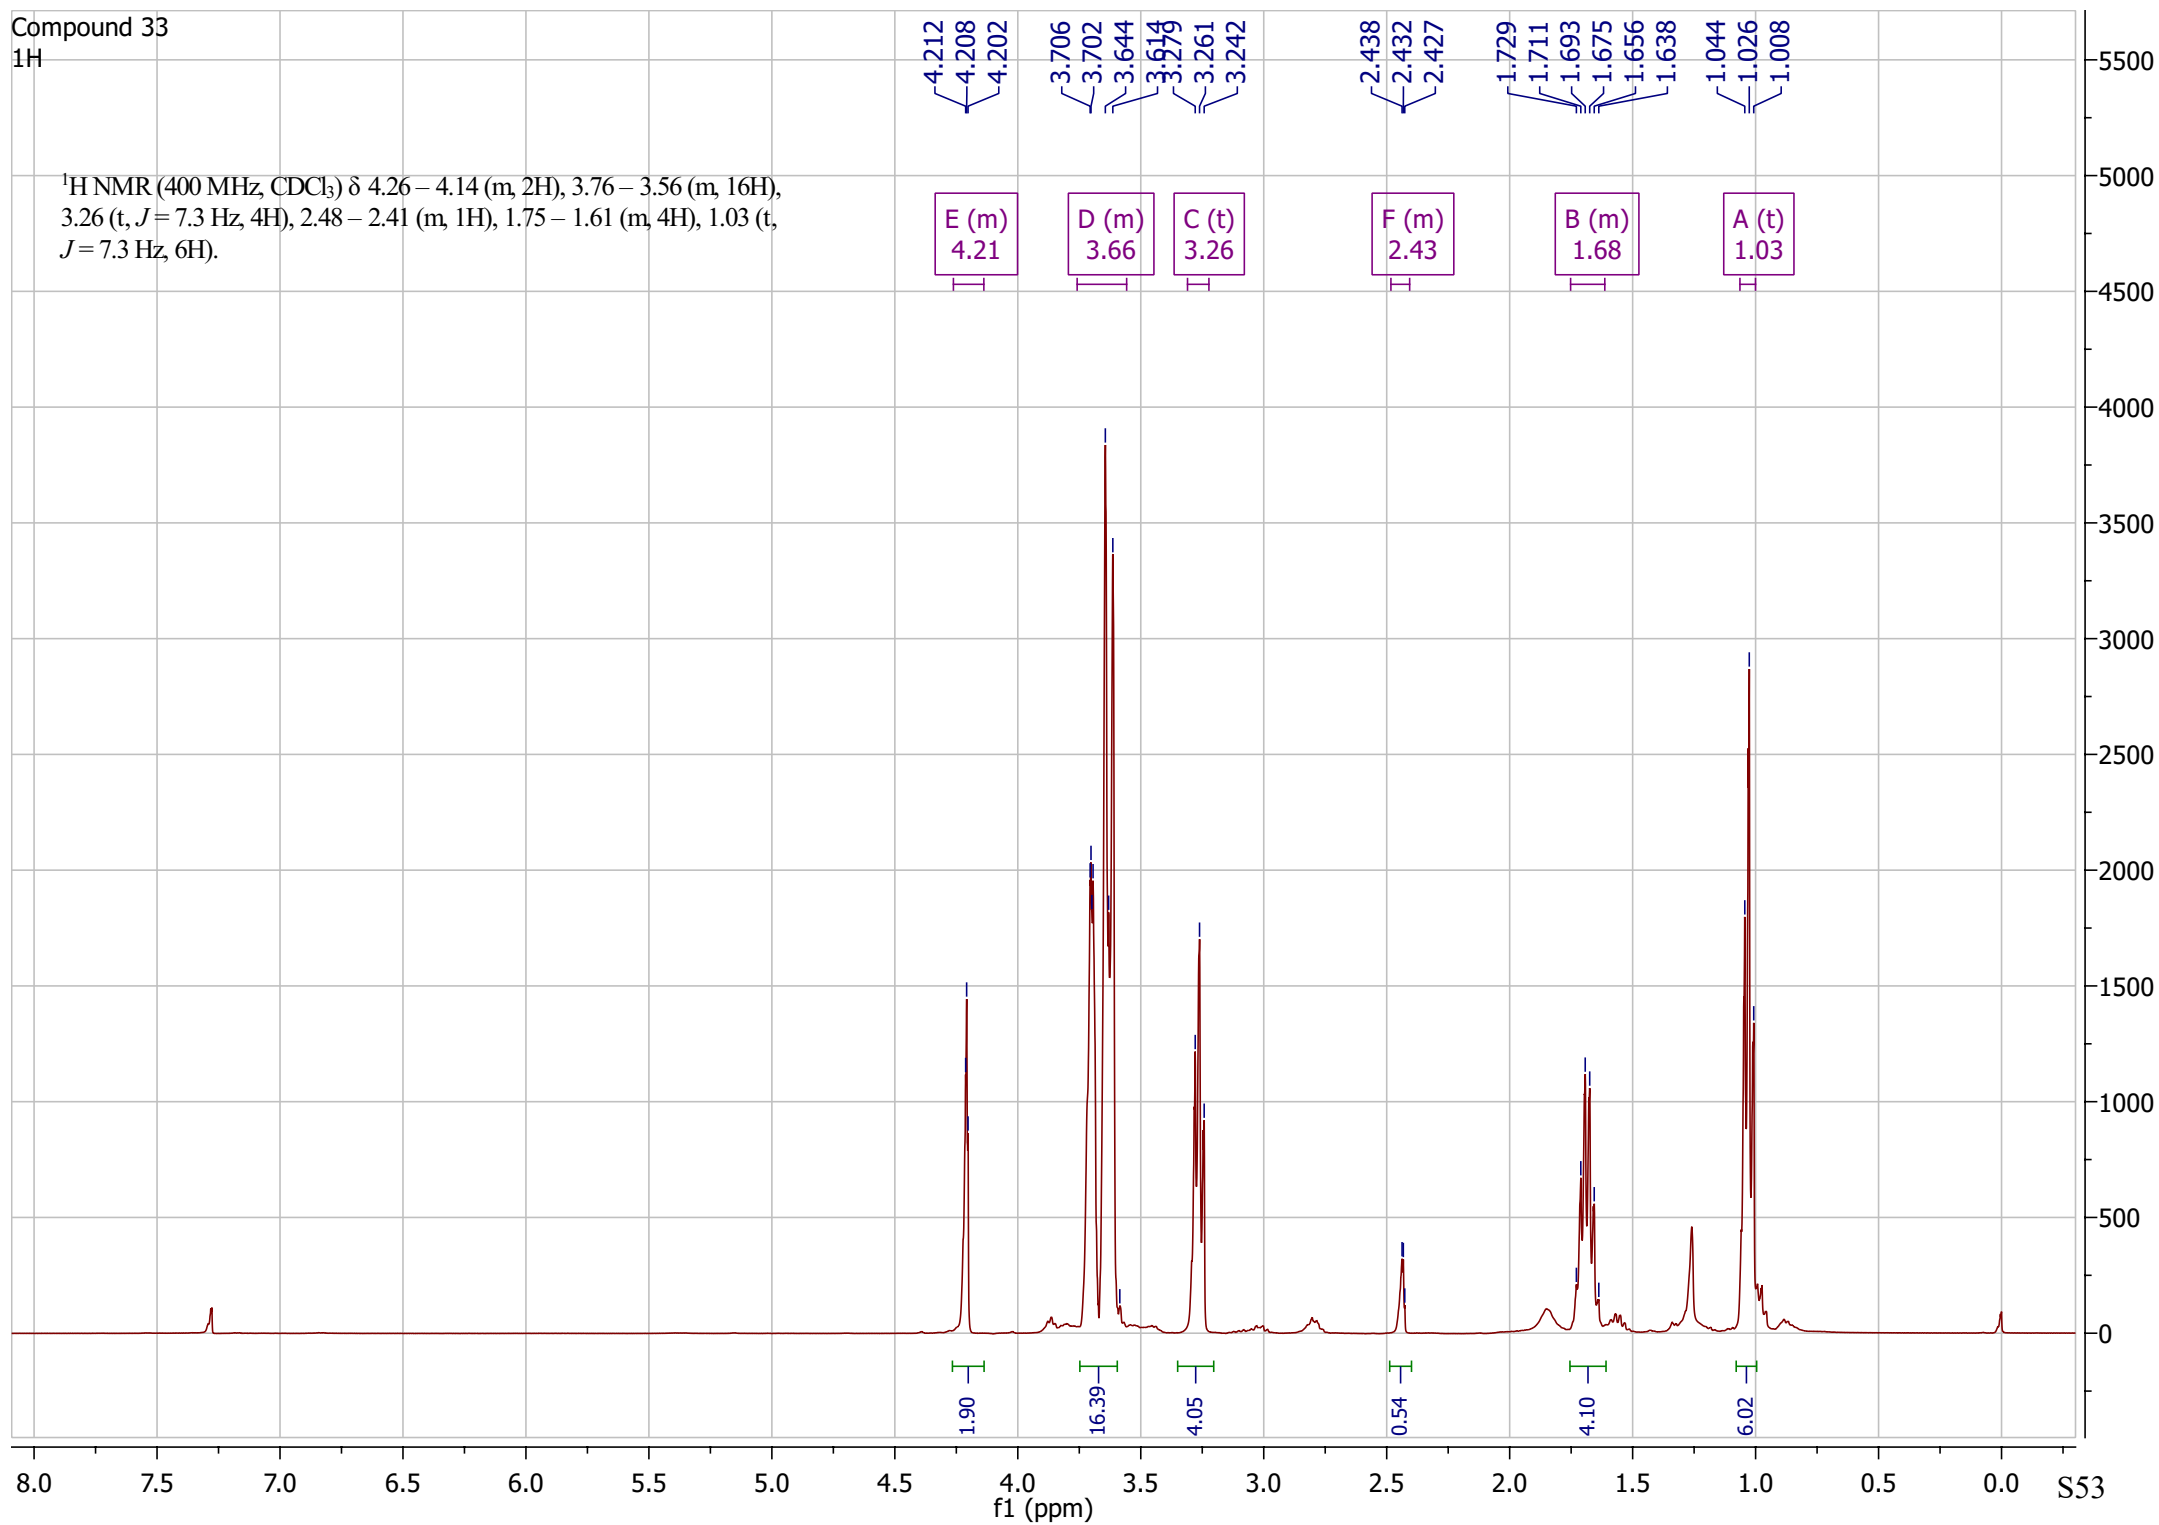

Compound 33  
13C

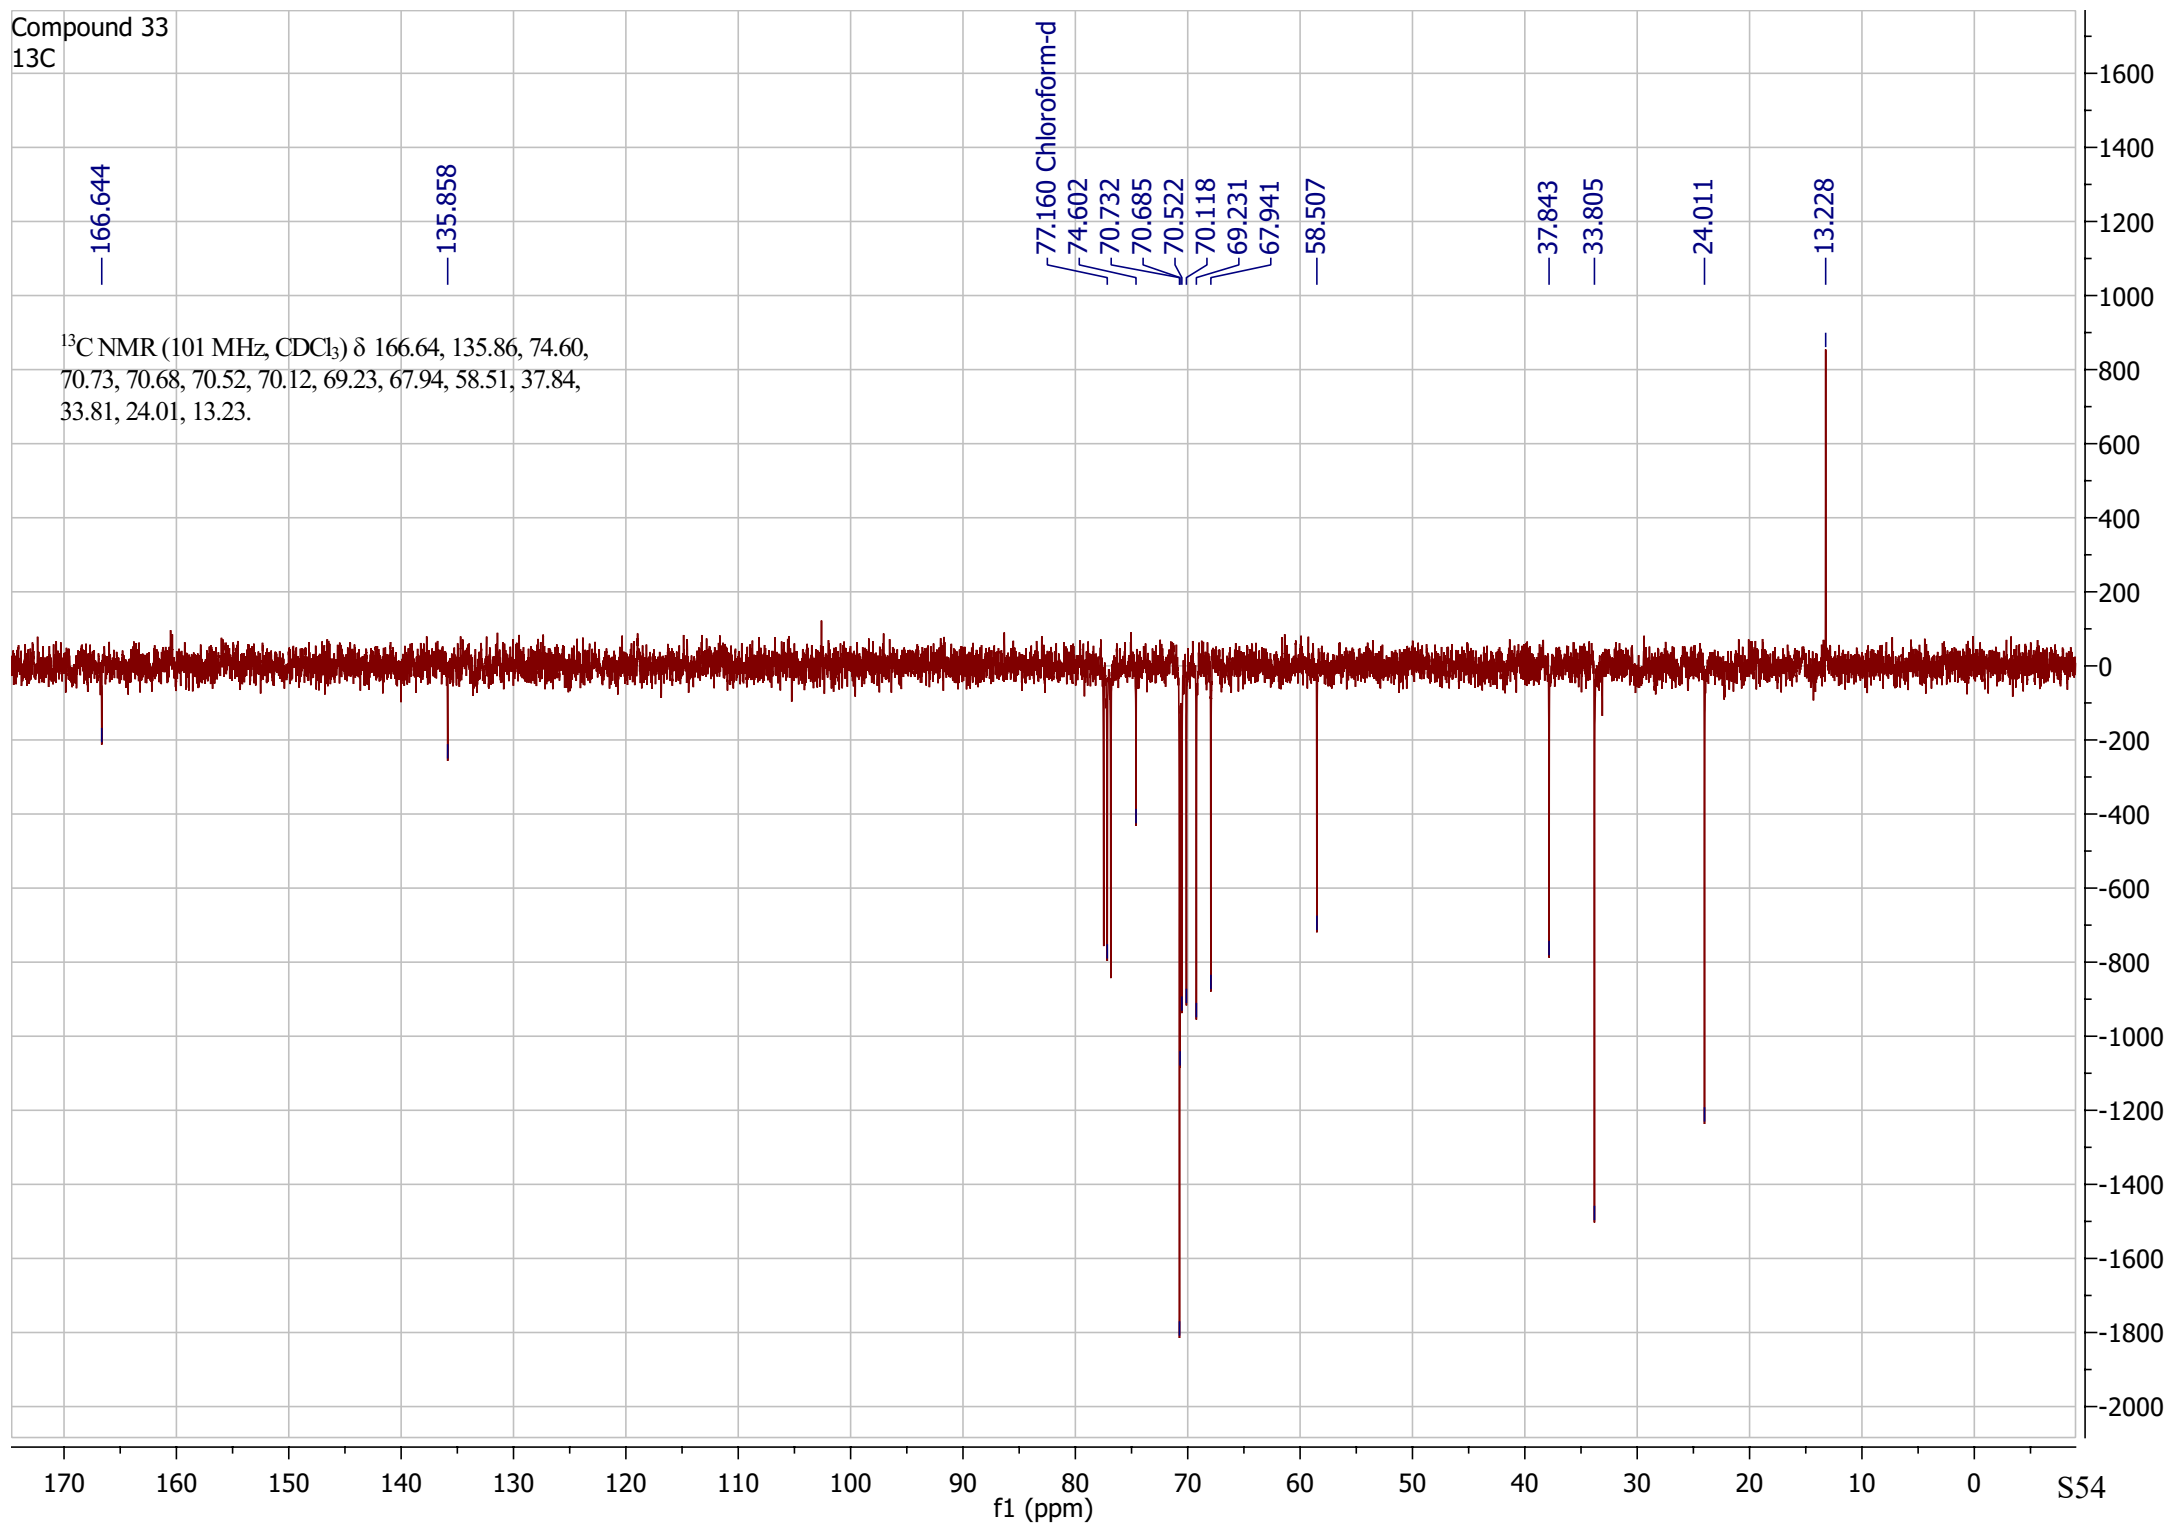

Compound 34  
1H

$^1\text{H NMR}$  (400 MHz,  $\text{CDCl}_3$ )  $\delta$  4.21 (d,  $J = 2.4$  Hz, 2H), 3.73 – 3.58 (m, 16H), 3.28 (t,  $J = 7.4$  Hz, 4H), 2.44 (t,  $J = 2.4$  Hz, 1H), 1.69 – 1.58 (m, 4H), 1.51 – 1.39 (m, 4H), 0.93 (t,  $J = 7.3$  Hz, 6H).

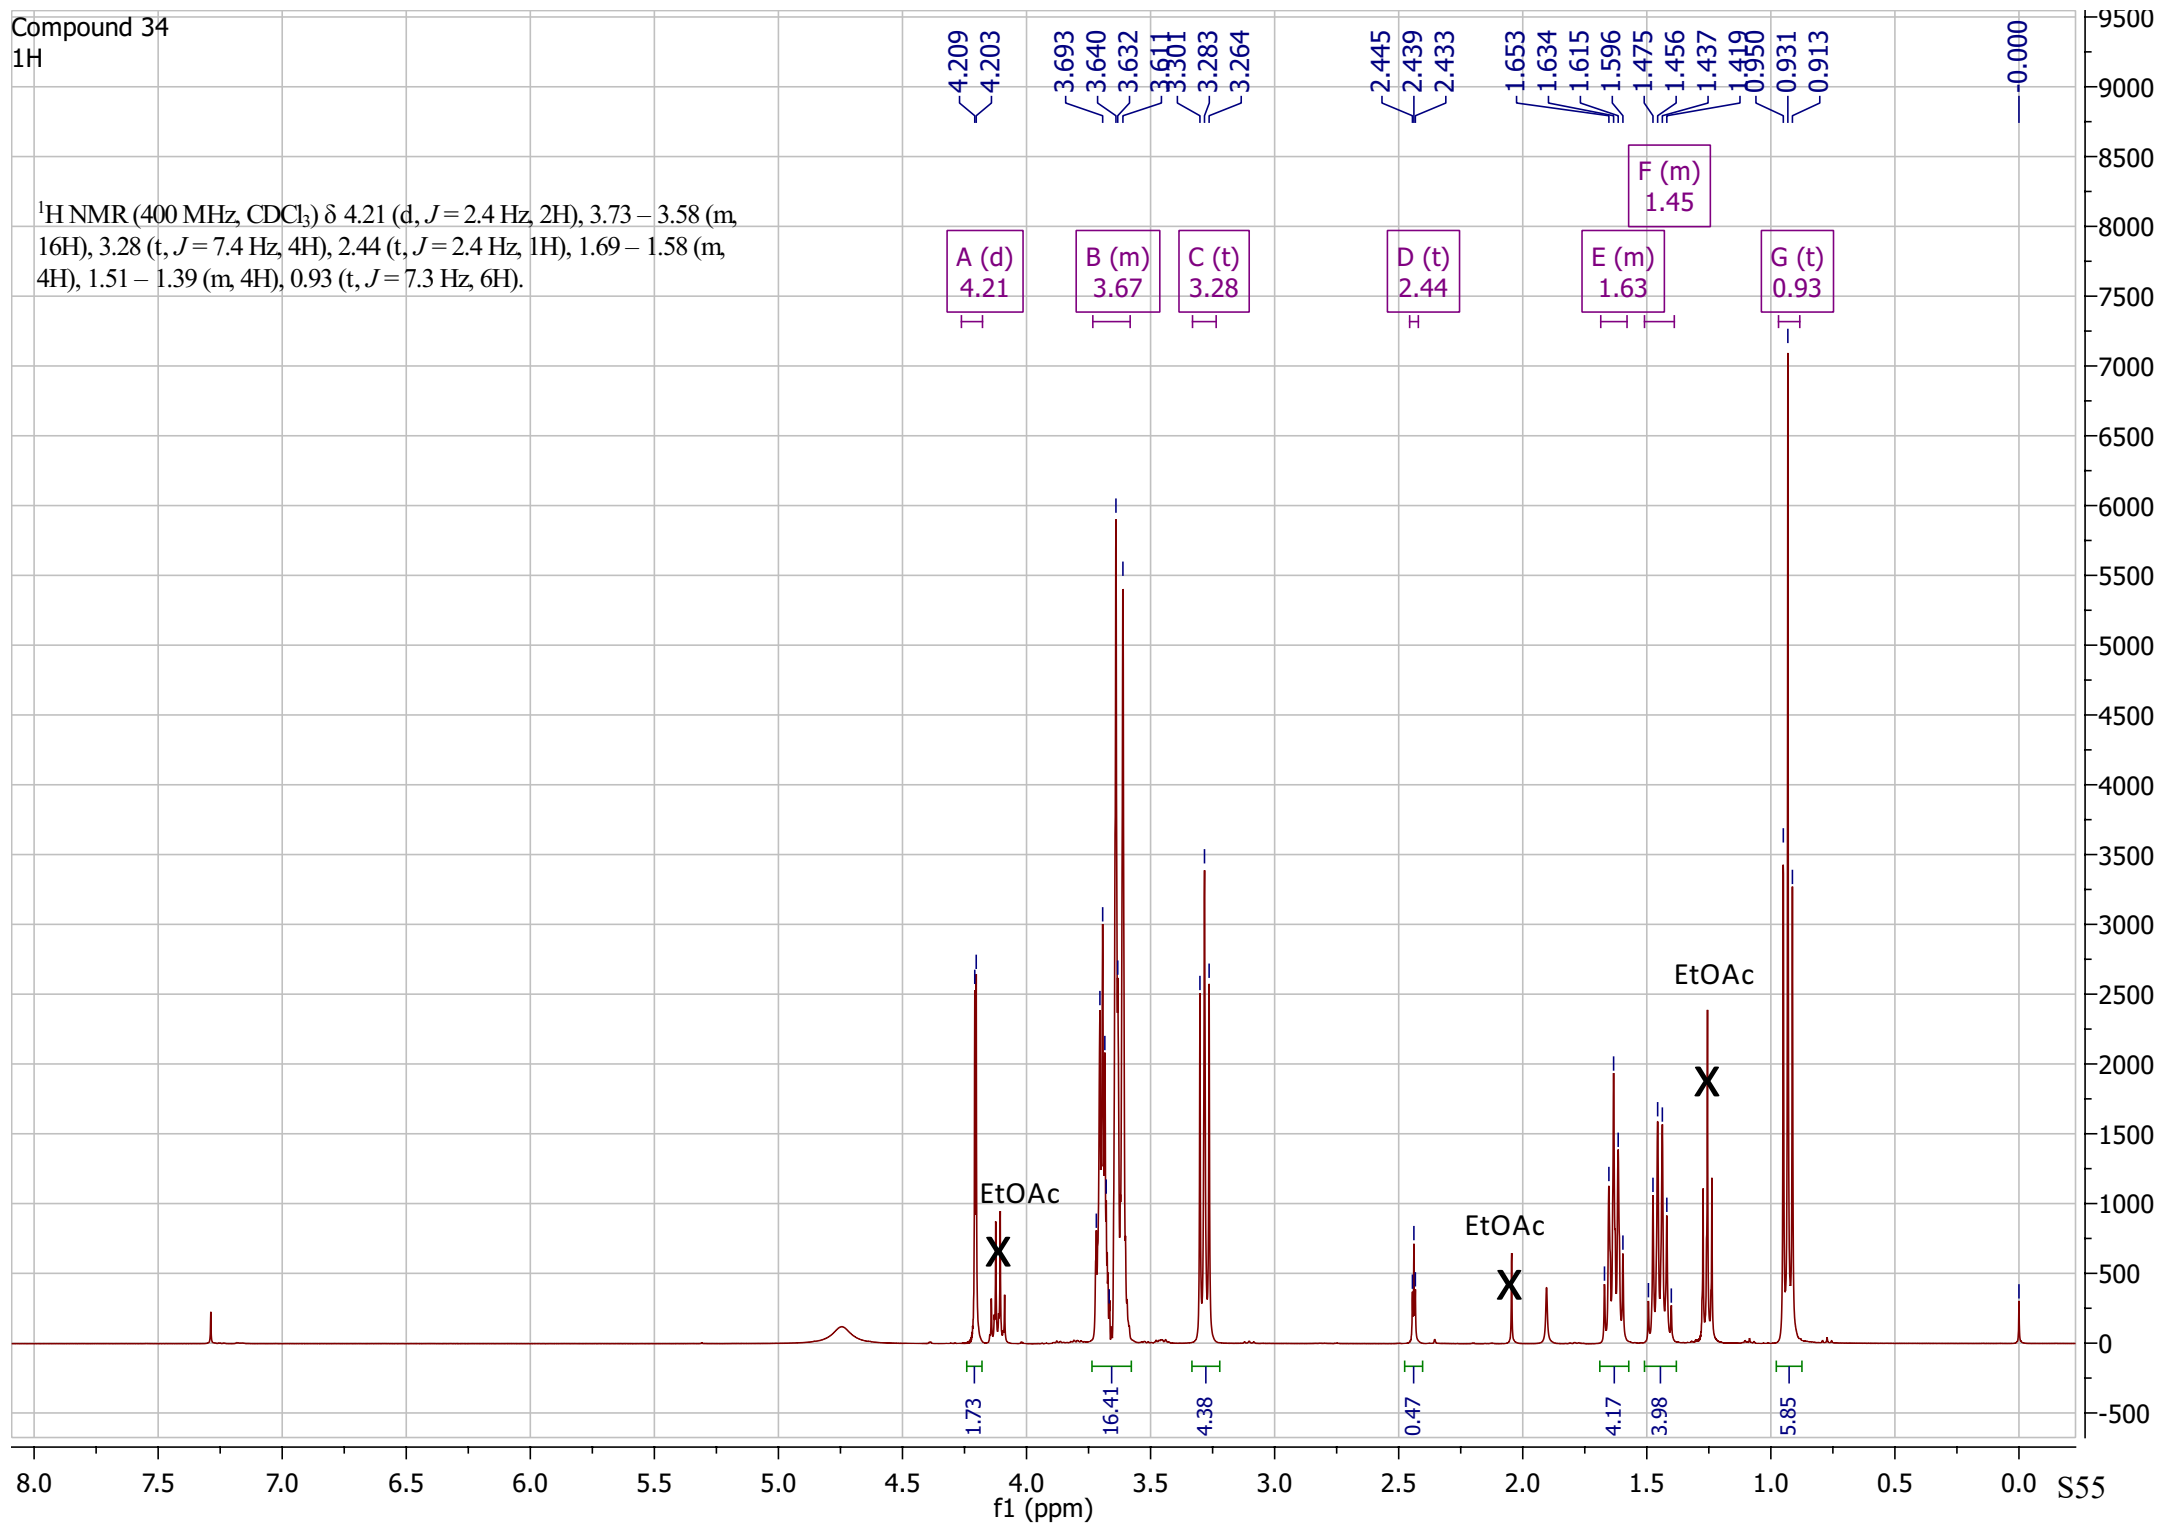

Compound 34  
13C

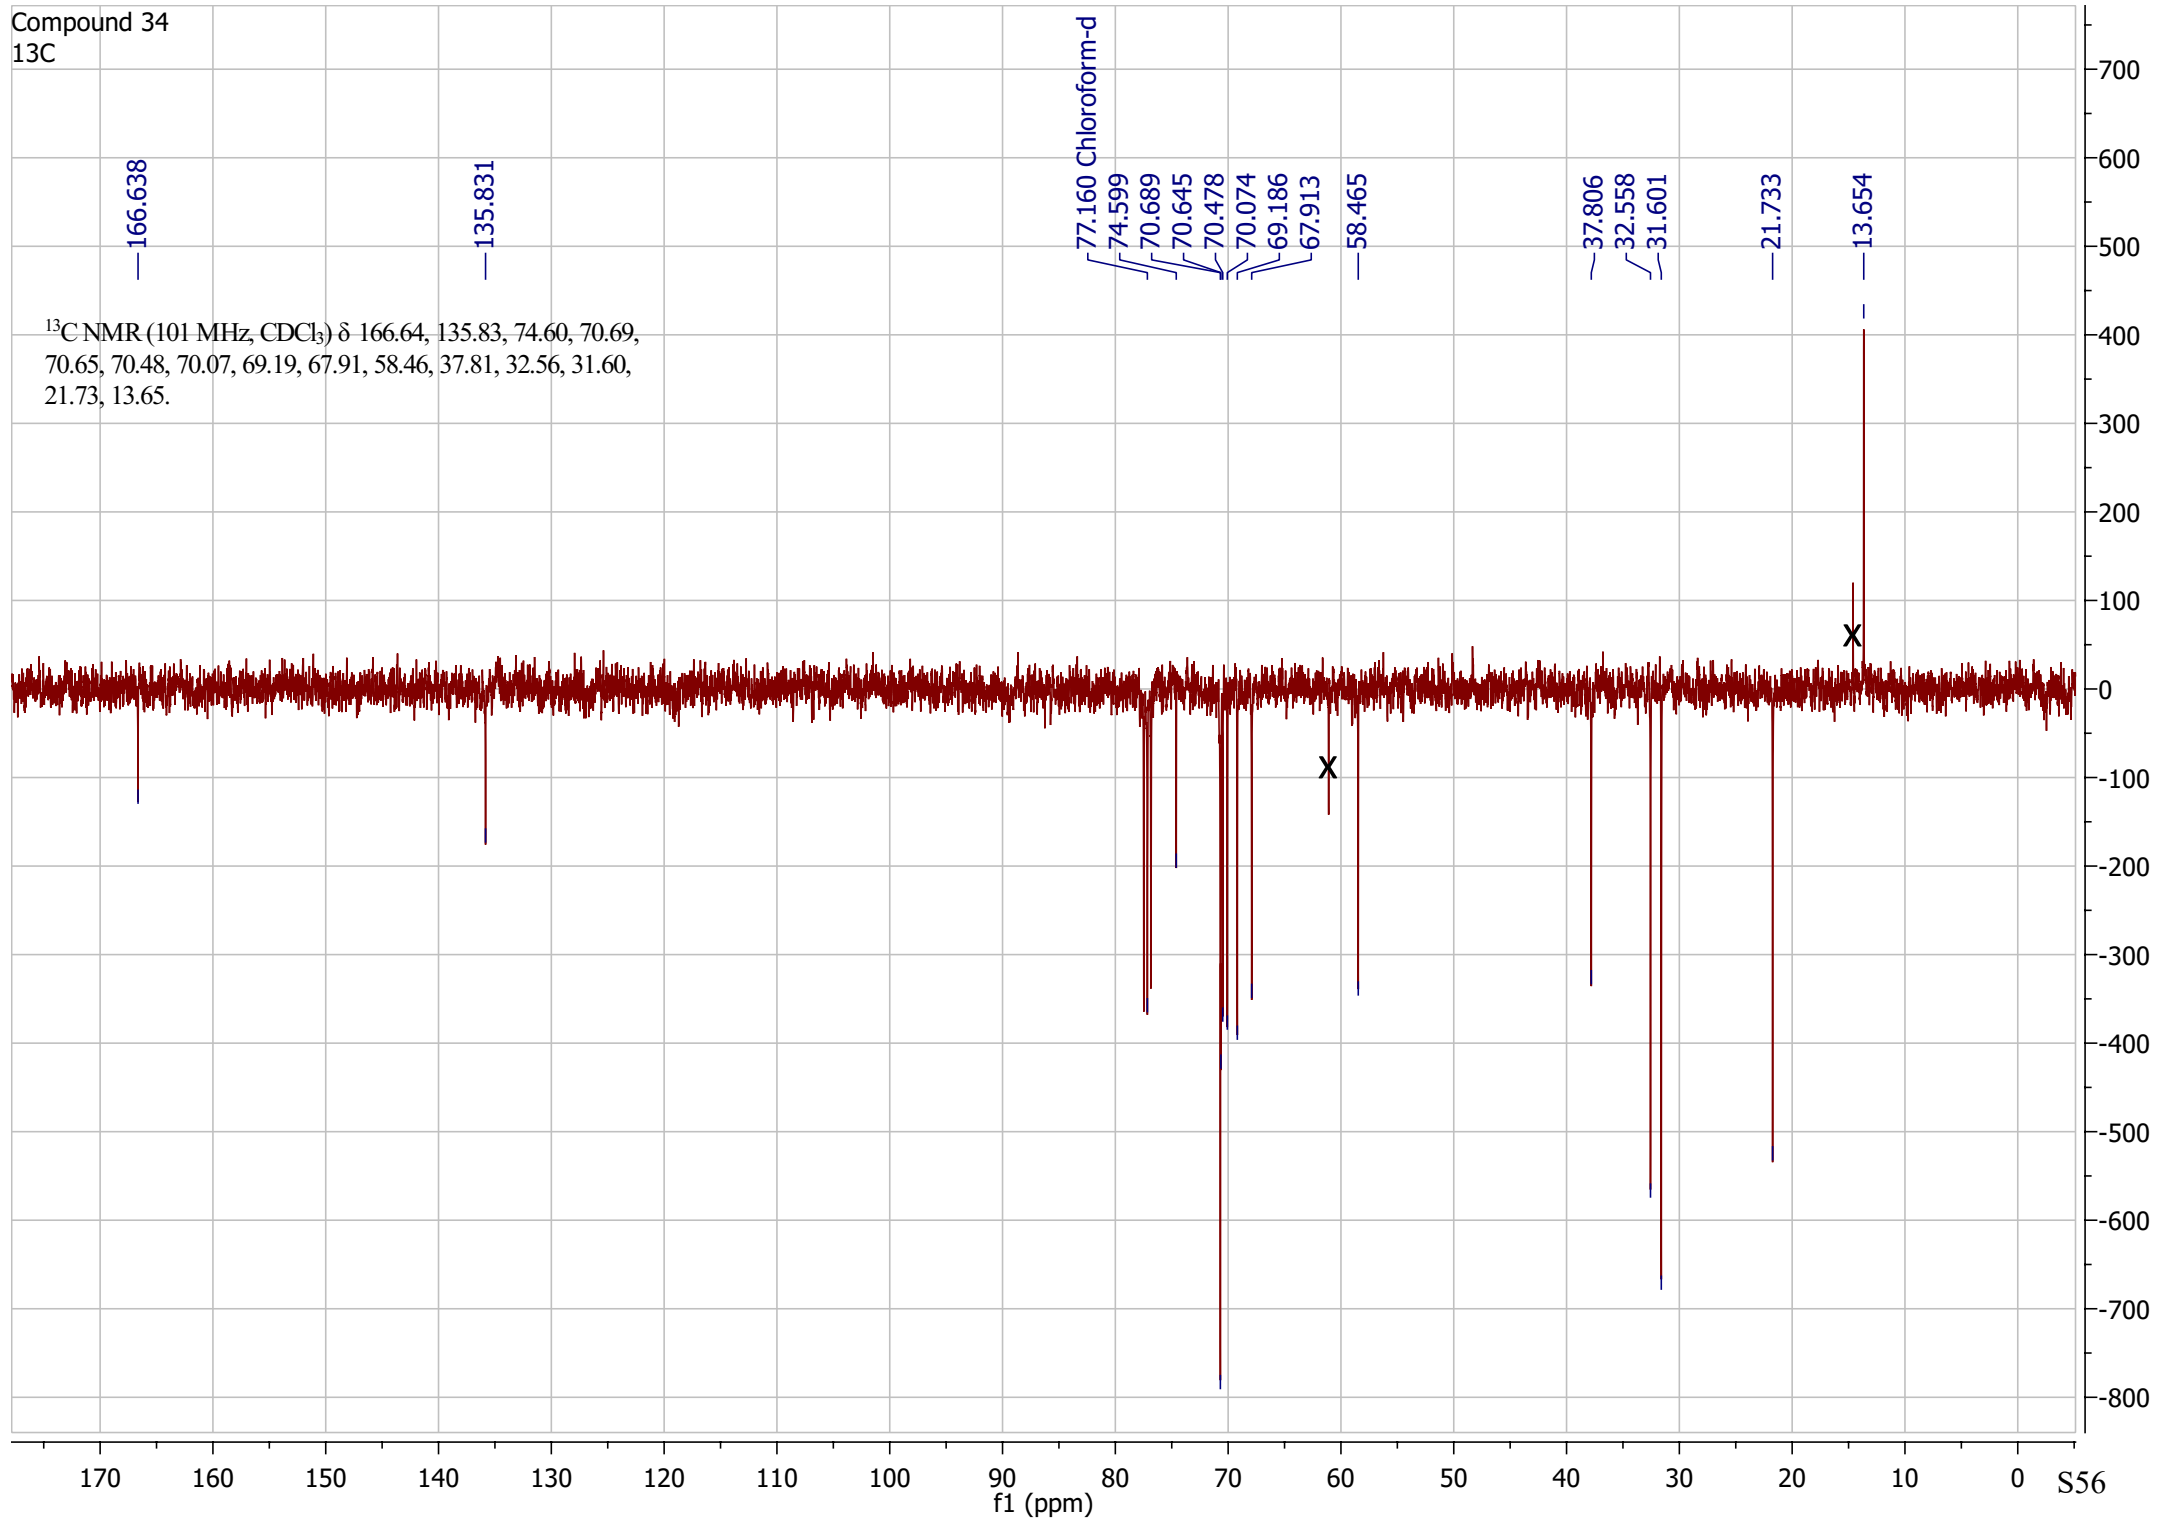

## Compound 35

<sup>1</sup>H

<sup>1</sup>H NMR (400 MHz, CDCl<sub>3</sub>) δ 4.20 (d, *J* = 2.4 Hz, 2H), 3.73 – 3.59 (m, 16H), 3.31 – 3.24 (m, 4H), 2.44 (t, *J* = 2.3 Hz, 1H), 1.64 (dt, *J* = 15.1, 7.4 Hz, 4H), 1.42 (dt, *J* = 14.3, 7.2 Hz, 4H), 1.36 – 1.23 (m, 8H), 0.89 (t, *J* = 6.9 Hz, 6H).

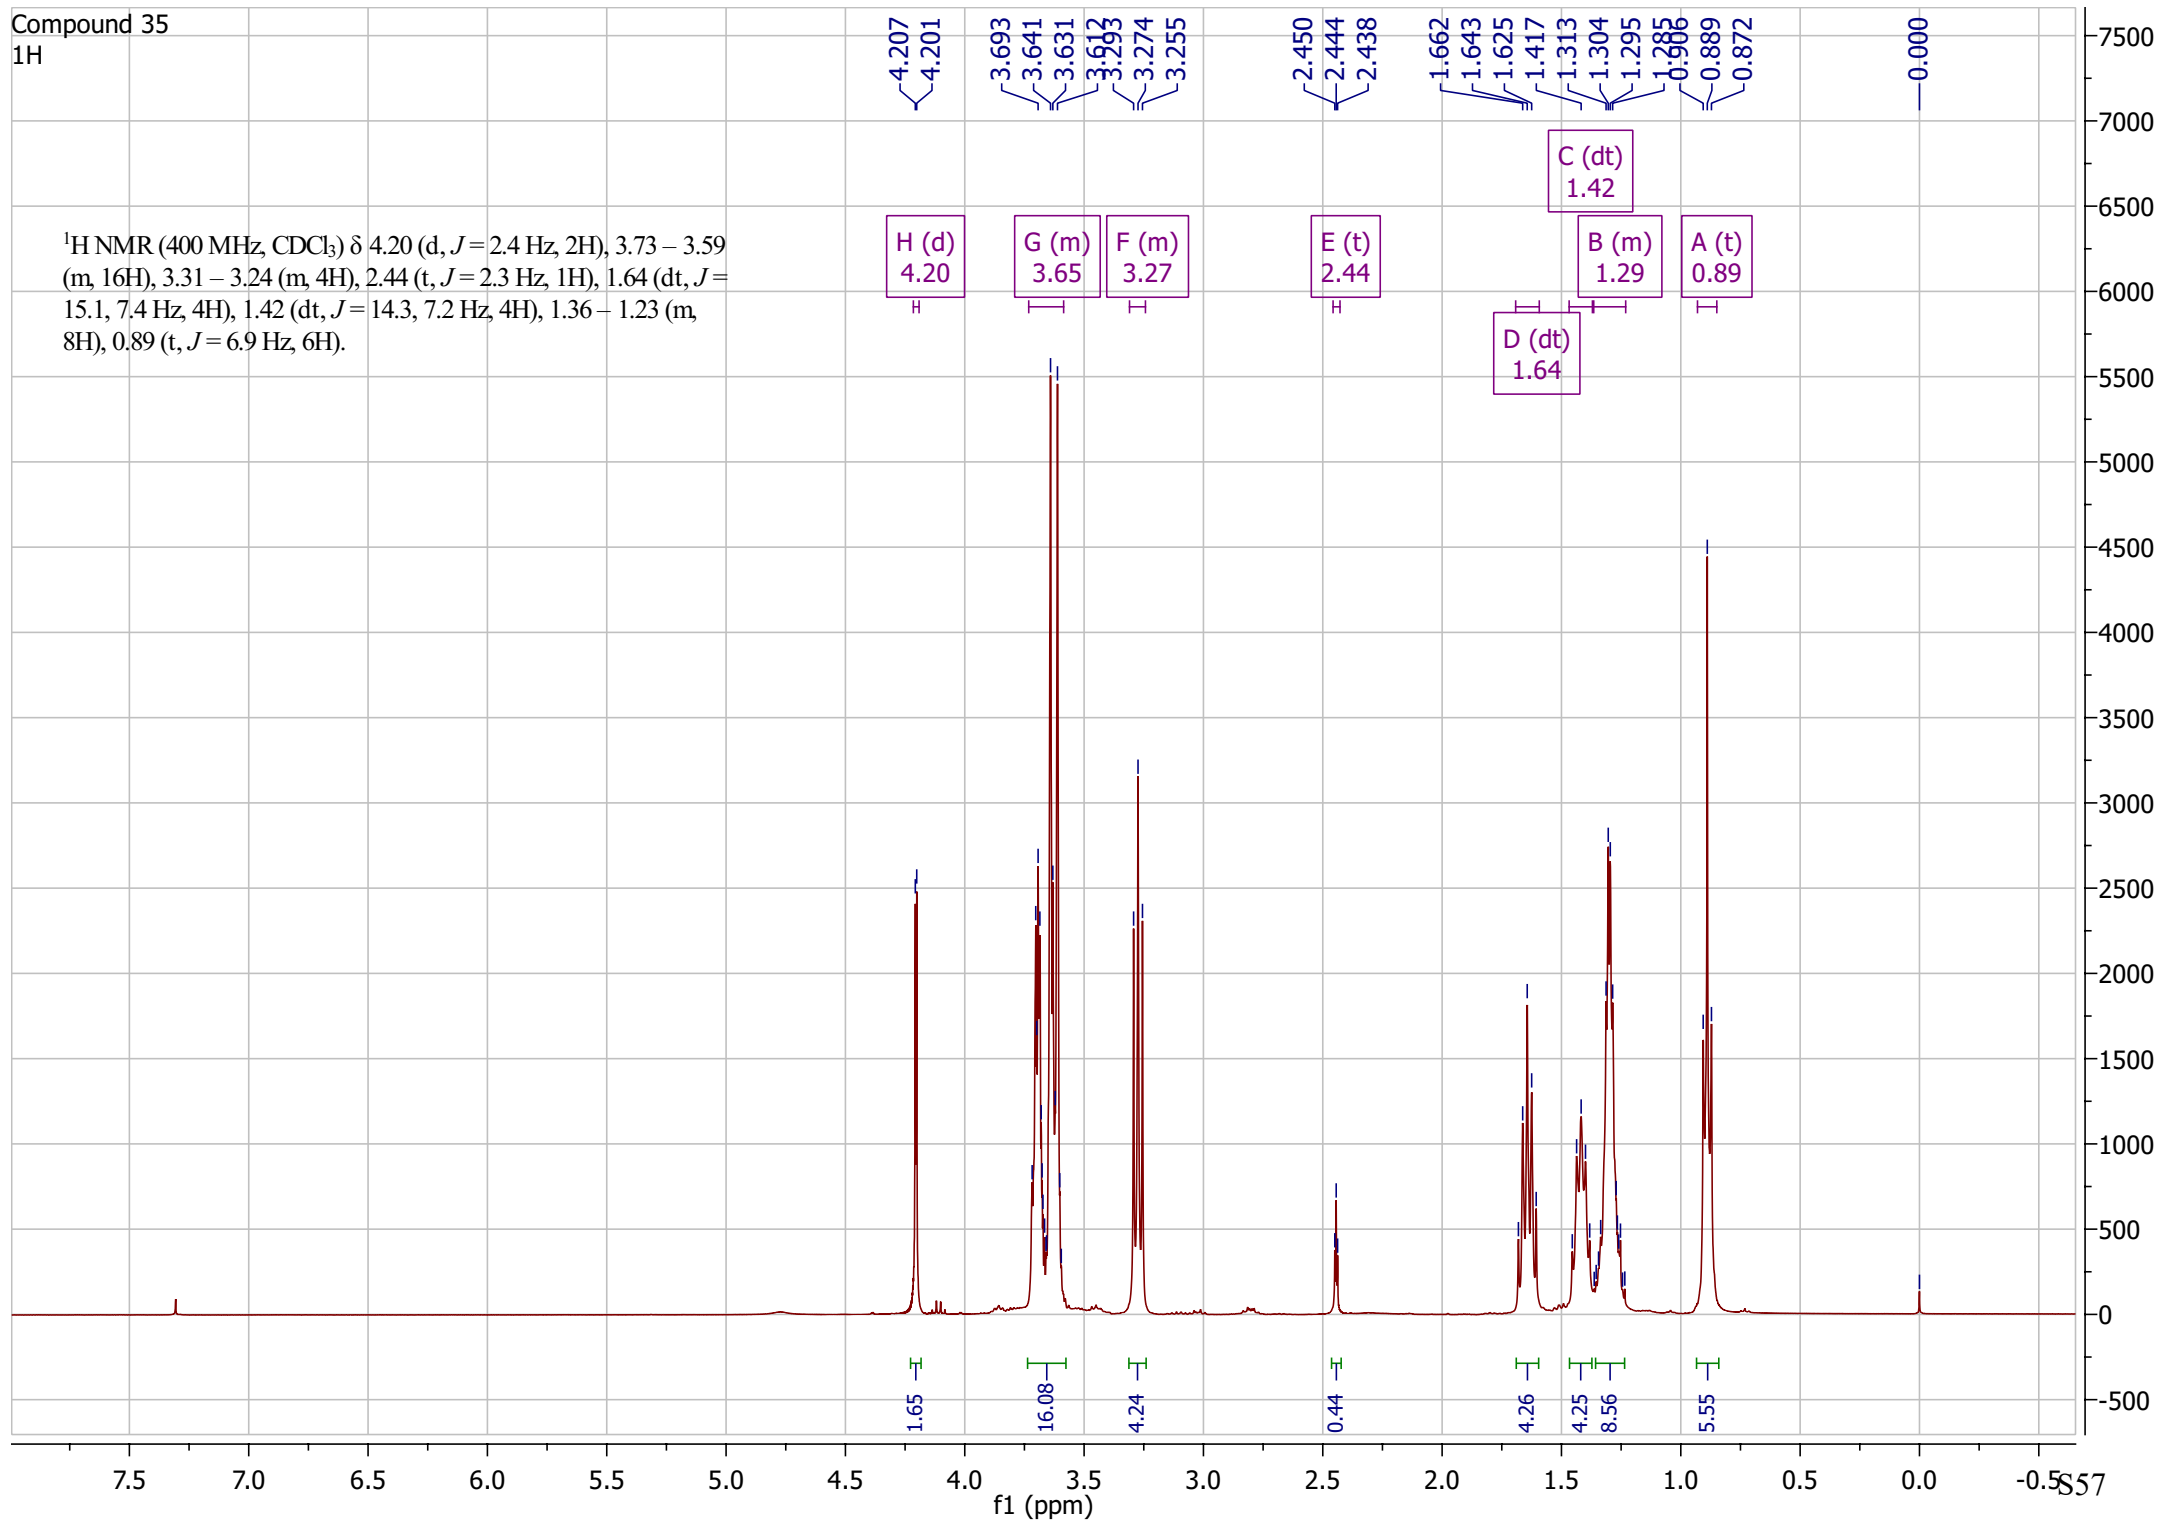

Compound 35  
13C

$^{13}\text{C}$  NMR (101 MHz,  $\text{CDCl}_3$ )  $\delta$  166.57, 135.74, 74.55, 70.64, 70.60, 70.43, 70.02, 69.12, 67.85, 58.40, 37.75, 31.85, 31.29, 30.44, 28.21, 22.51, 14.02.

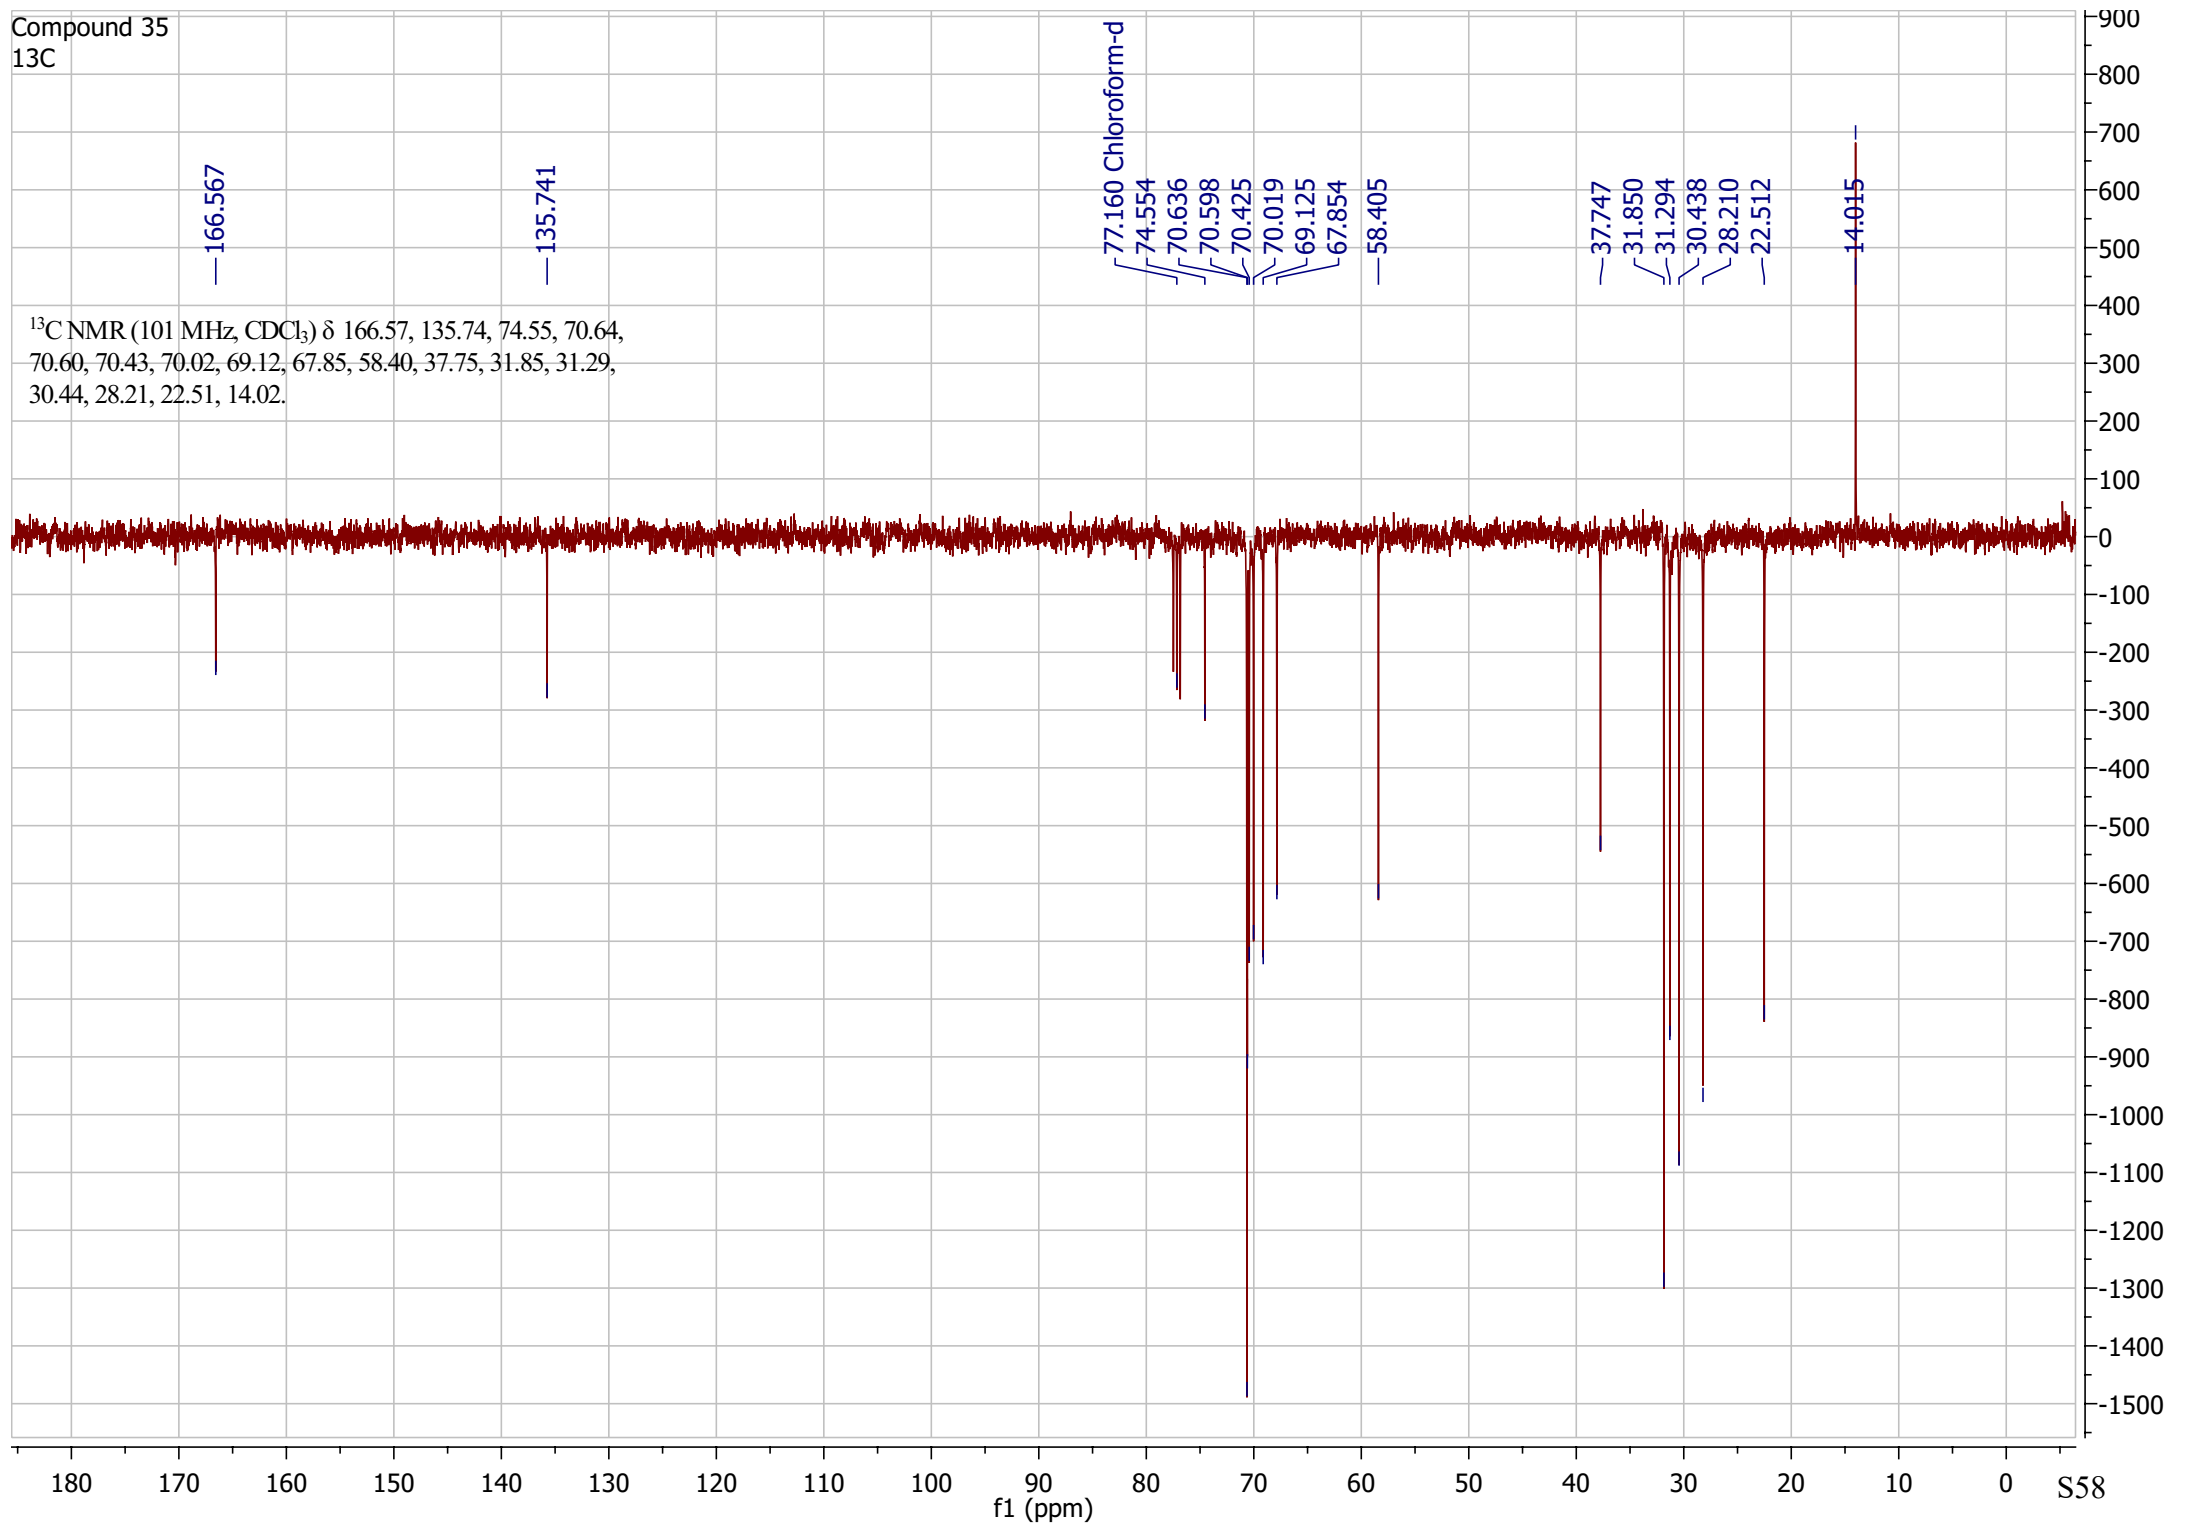

## Compound 36

<sup>1</sup>H

<sup>1</sup>H NMR (400 MHz, CDCl<sub>3</sub>) δ 4.21 (d, *J* = 2.4 Hz, 2H), 3.72 – 3.59 (m, 16H), 3.32 – 3.23 (m, 4H), 2.43 (t, *J* = 2.4 Hz, 1H), 1.64 (dt, *J* = 15.0, 7.4 Hz, 4H), 1.46 – 1.36 (m, 4H), 1.30 (dt, *J* = 8.7, 5.1 Hz, 16H), 0.88 (t, *J* = 6.8 Hz, 6H).

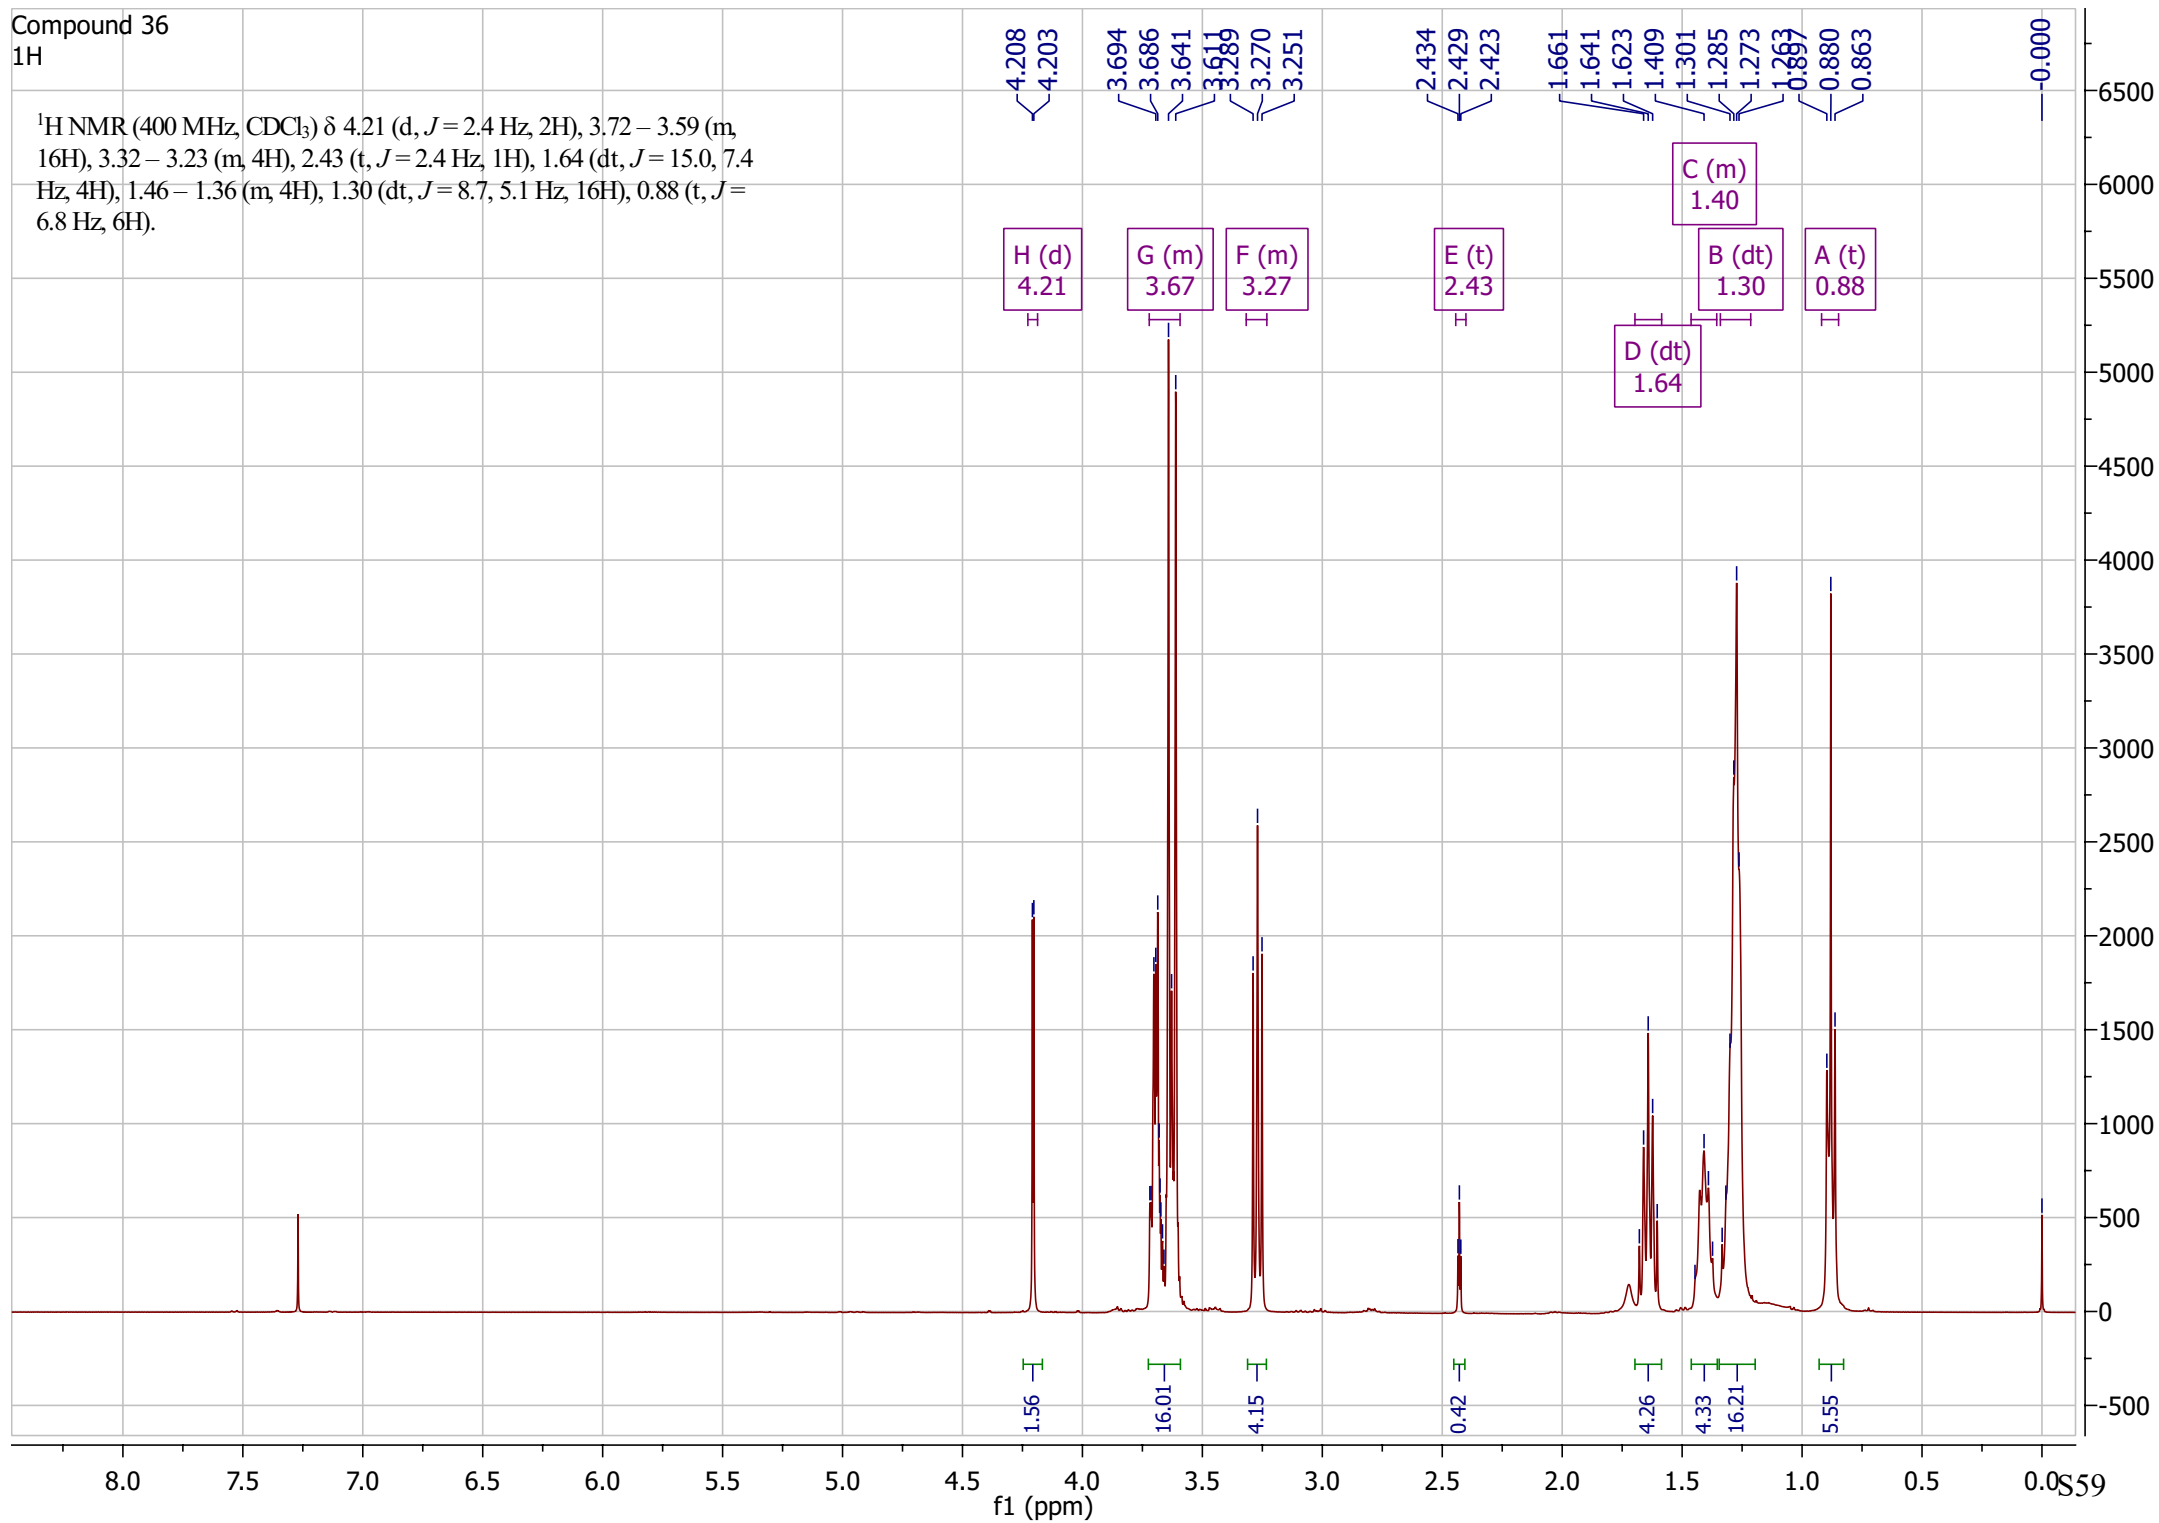

Compound 36  
13C

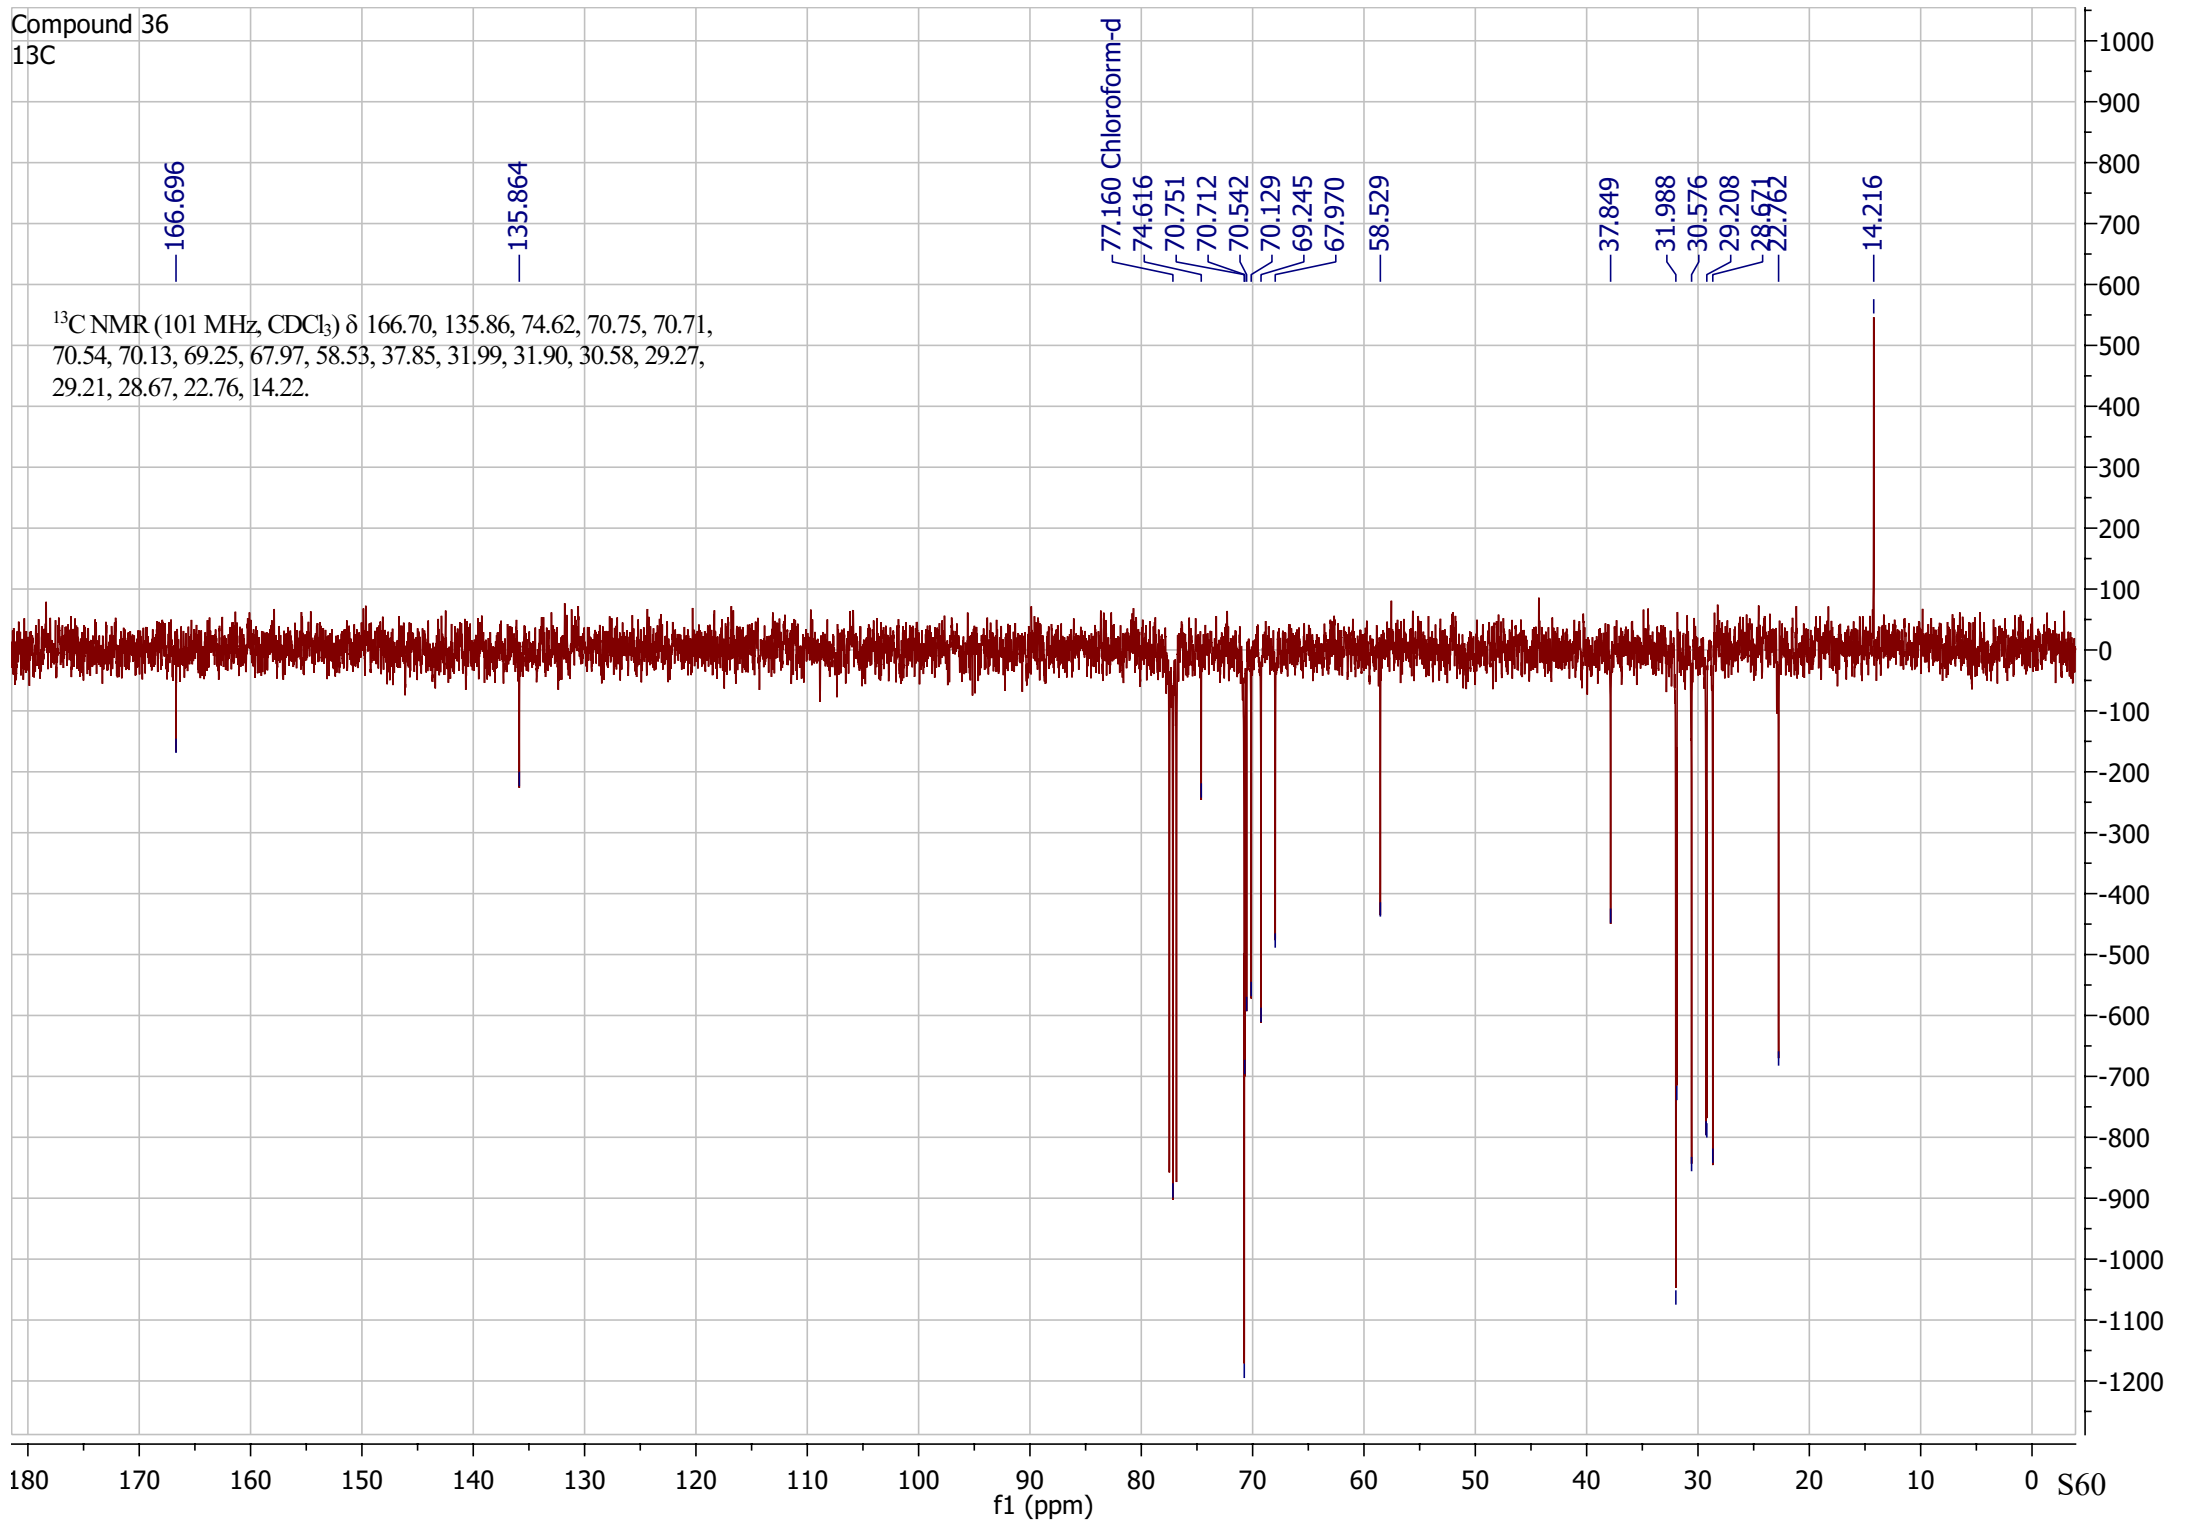



Compound 37

<sup>1</sup>H

<sup>1</sup>H NMR (400 MHz, CDCl<sub>3</sub>) δ 4.21 (d, *J* = 2.4 Hz, 2H), 3.73 – 3.57 (m, 16H), 3.27 (t, *J* = 7.4 Hz, 4H), 2.43 (t, *J* = 2.4 Hz, 1H), 1.69 – 1.59 (m, 4H), 1.40 (dd, *J* = 13.2, 7.5 Hz, 4H), 1.34 – 1.20 (m, 32H), 0.88 (t, *J* = 6.8 Hz, 6H).

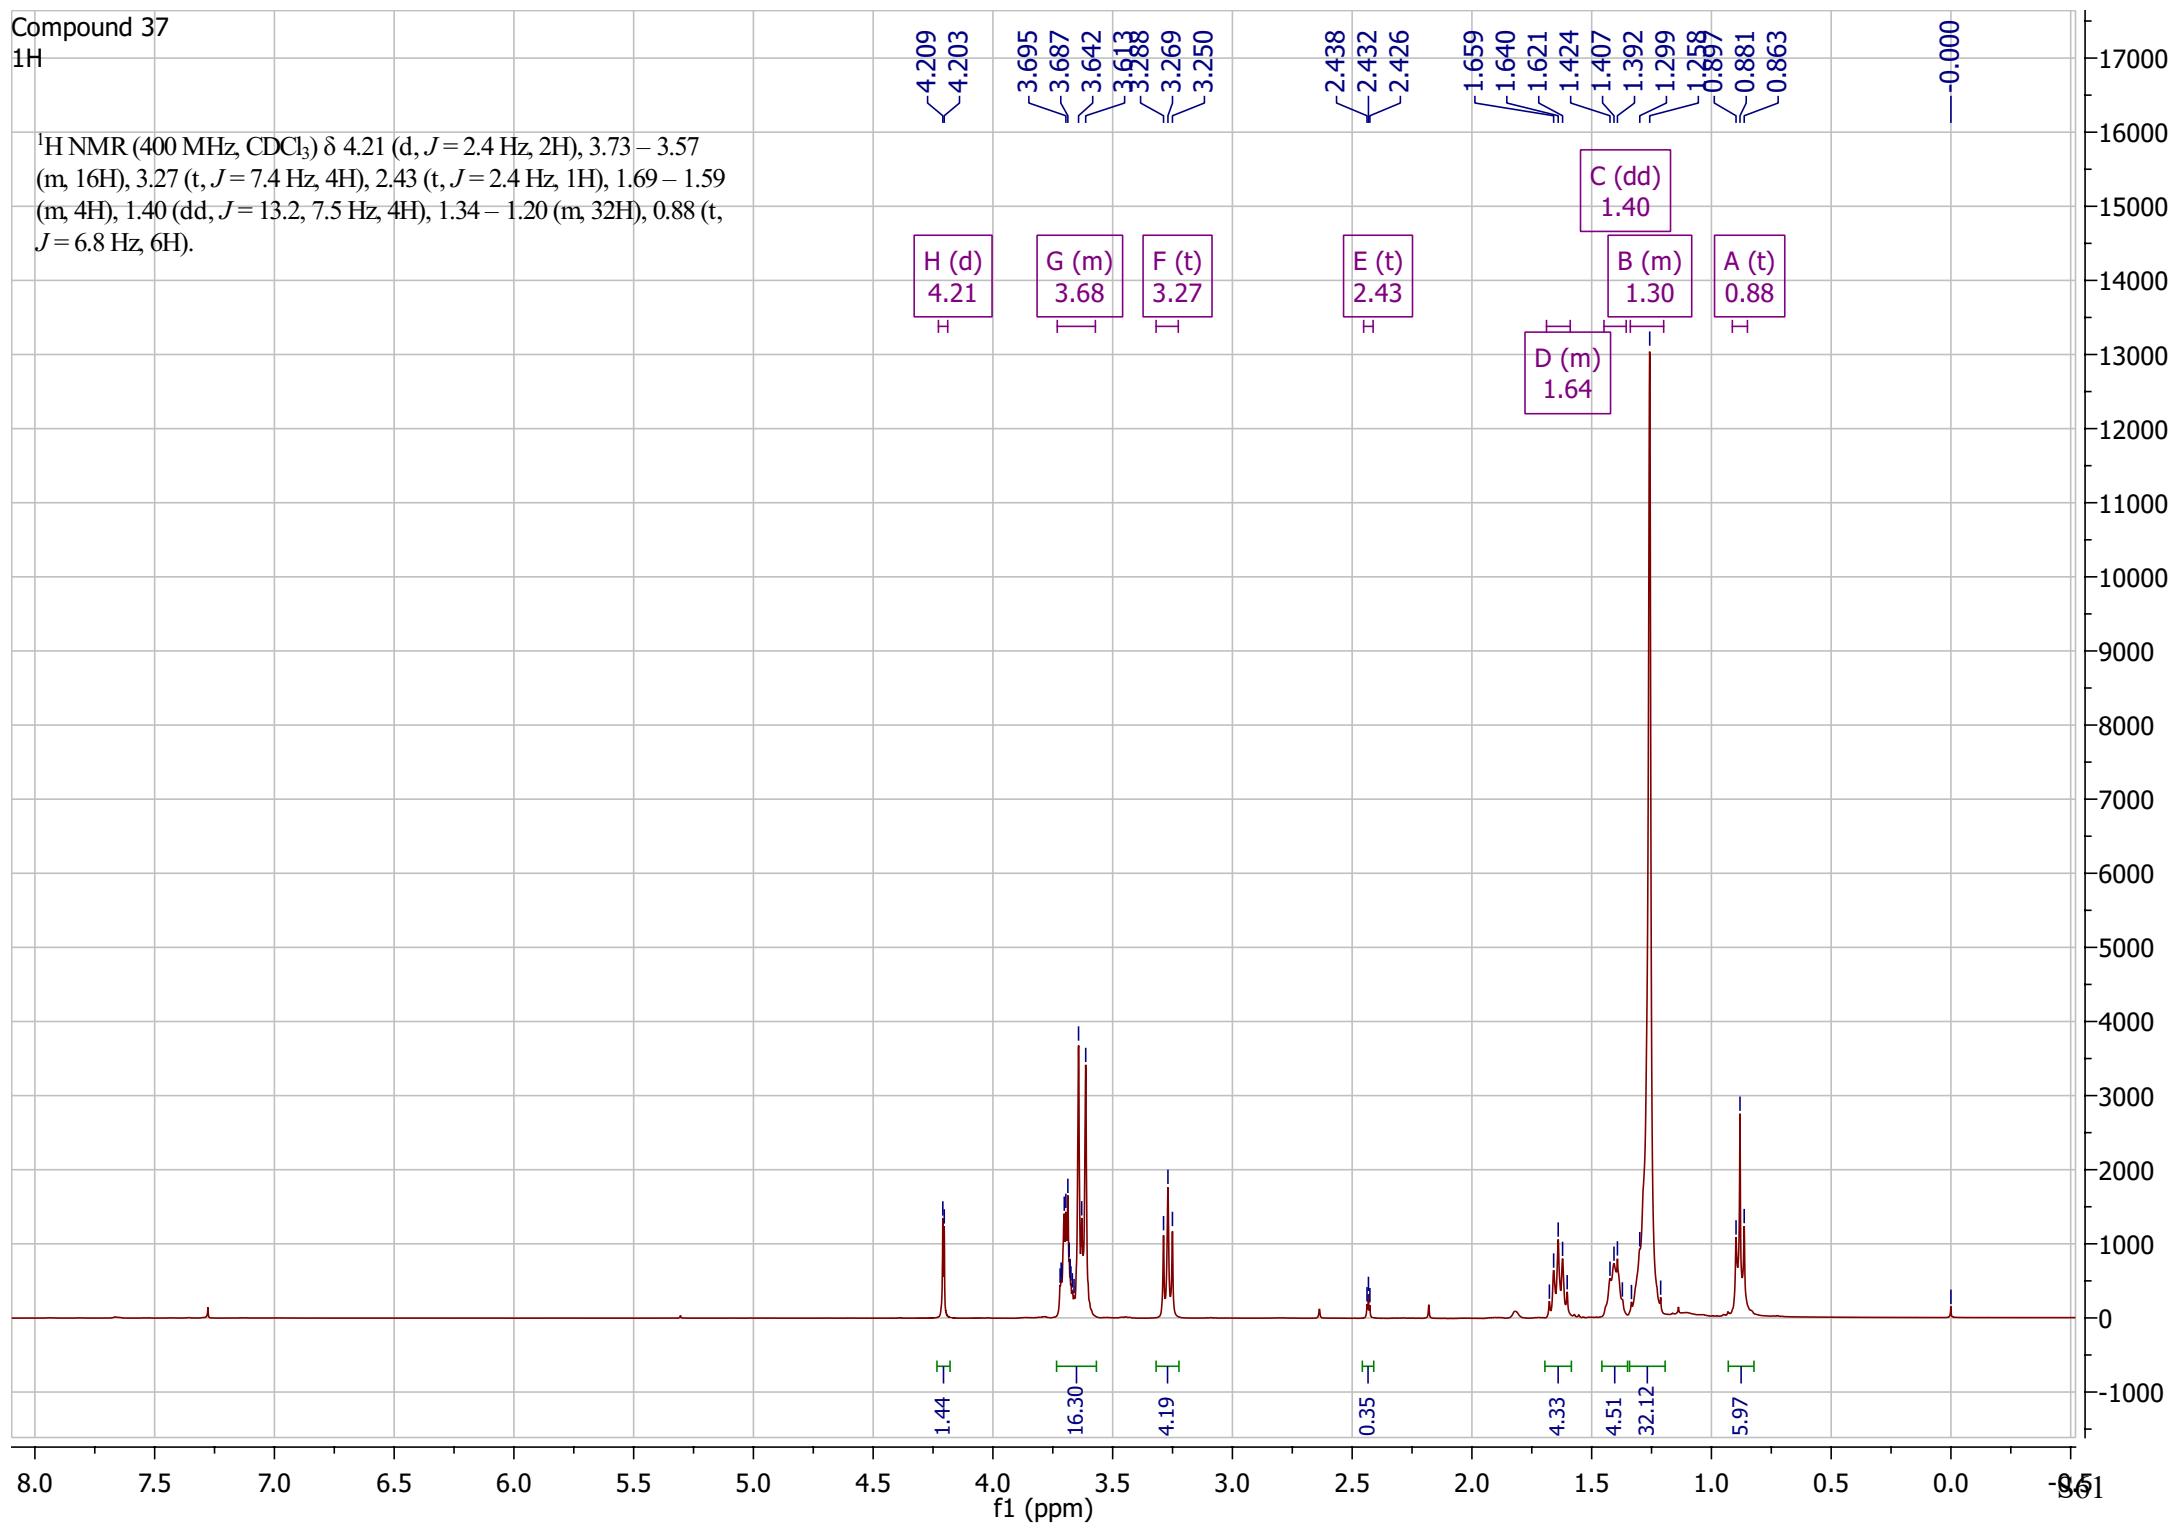

Compound 37  
13C

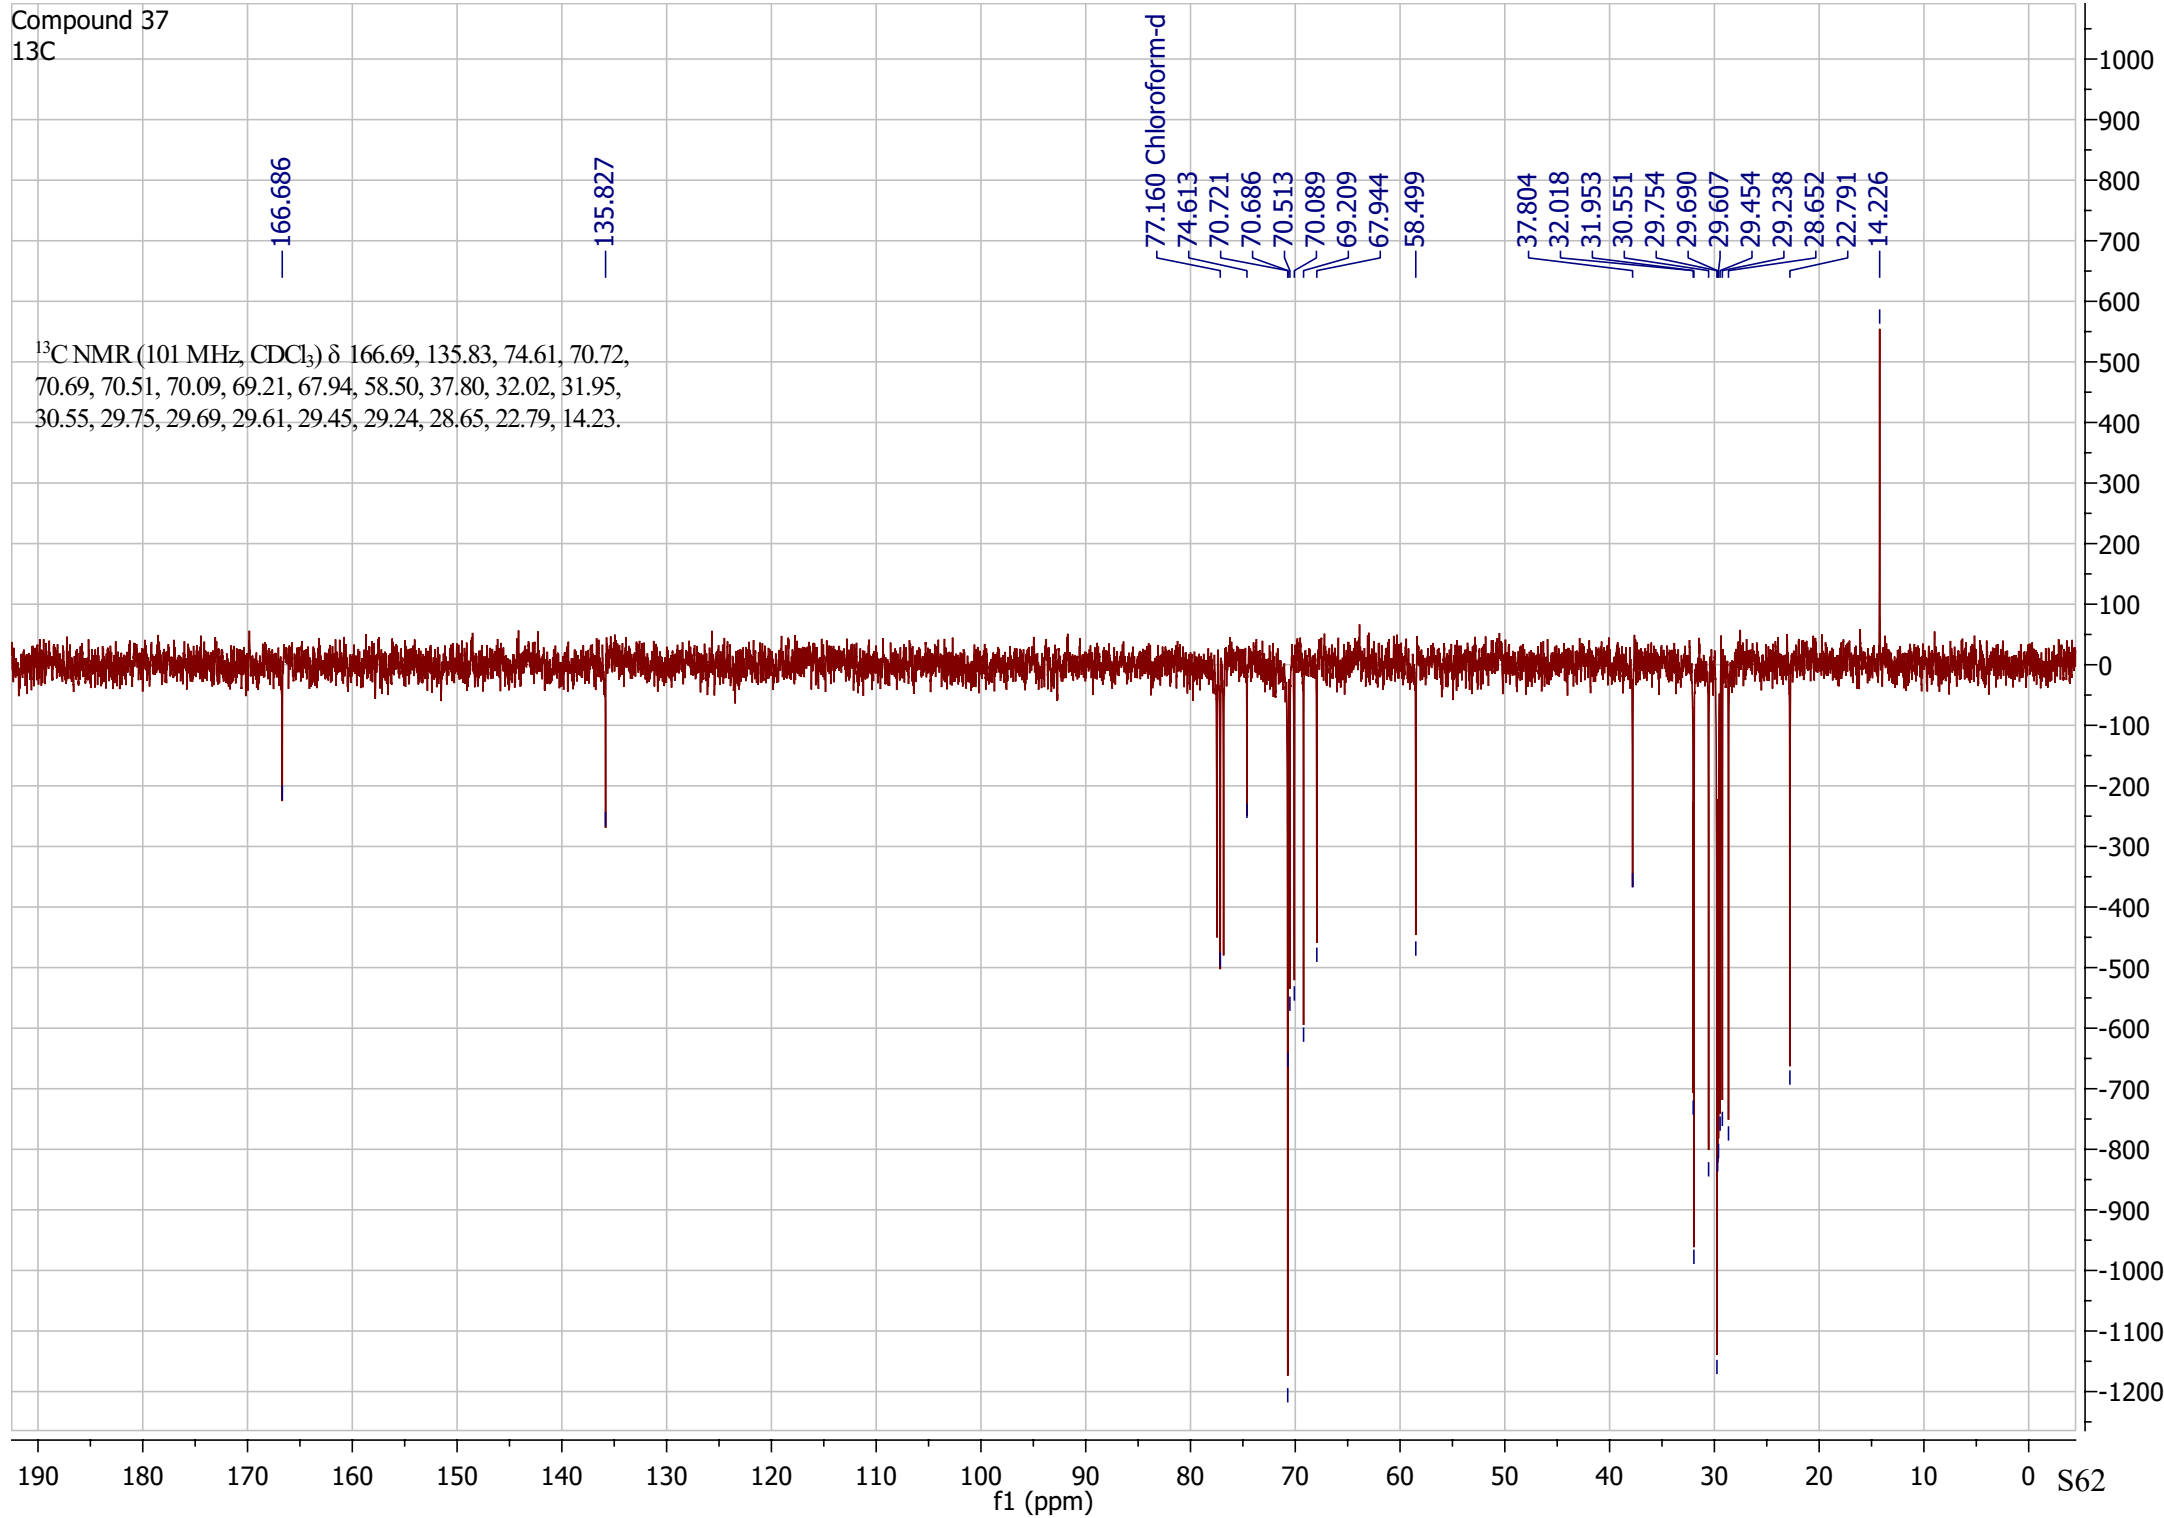

Compound 38  
1H

<sup>1</sup>H NMR (400 MHz, Chloroform-*d*) δ 5.51 (d, *J* = 4.9 Hz, 2H), 4.62 (dd, *J* = 7.9, 2.1 Hz, 2H), 4.35 – 4.27 (m, 4H), 4.21 (d, *J* = 2.0 Hz, 1H), 3.98 (t, *J* = 6.8 Hz, 2H), 3.73 – 3.57 (m, 16H), 3.57 – 3.34 (m, 4H), 2.45 (t, *J* = 2.4 Hz, 0H), 1.46 (d, *J* = 14.6 Hz, 12H), 1.32 (d, *J* = 3.9 Hz, 12H).

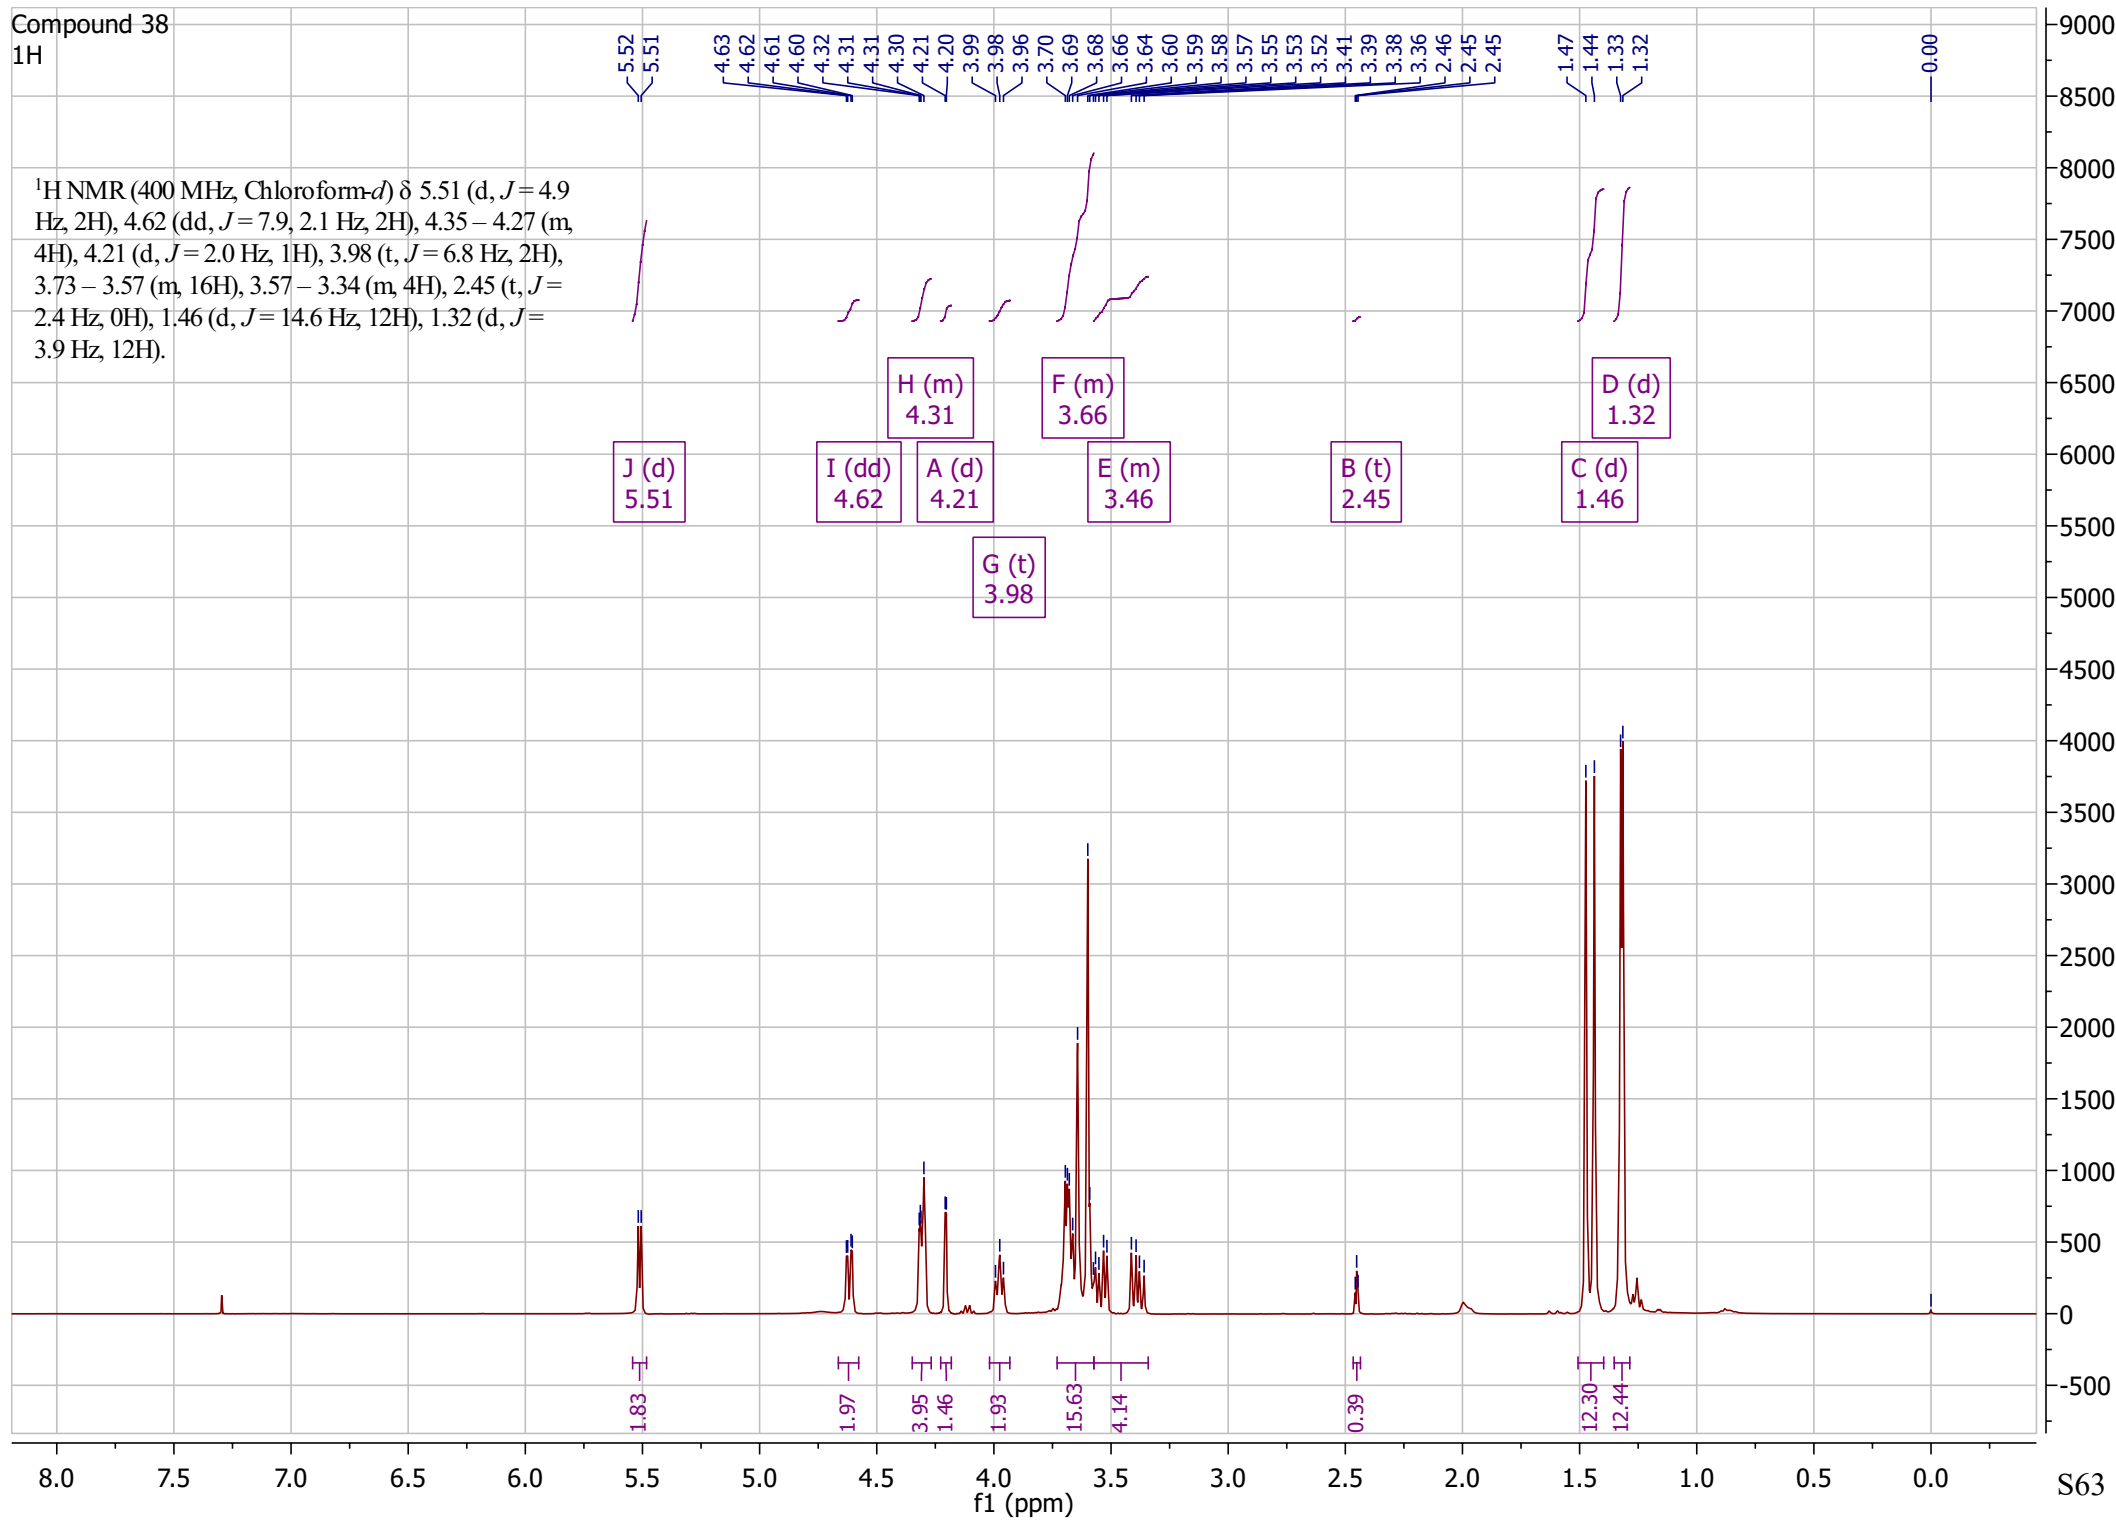

Compound 38  
13C

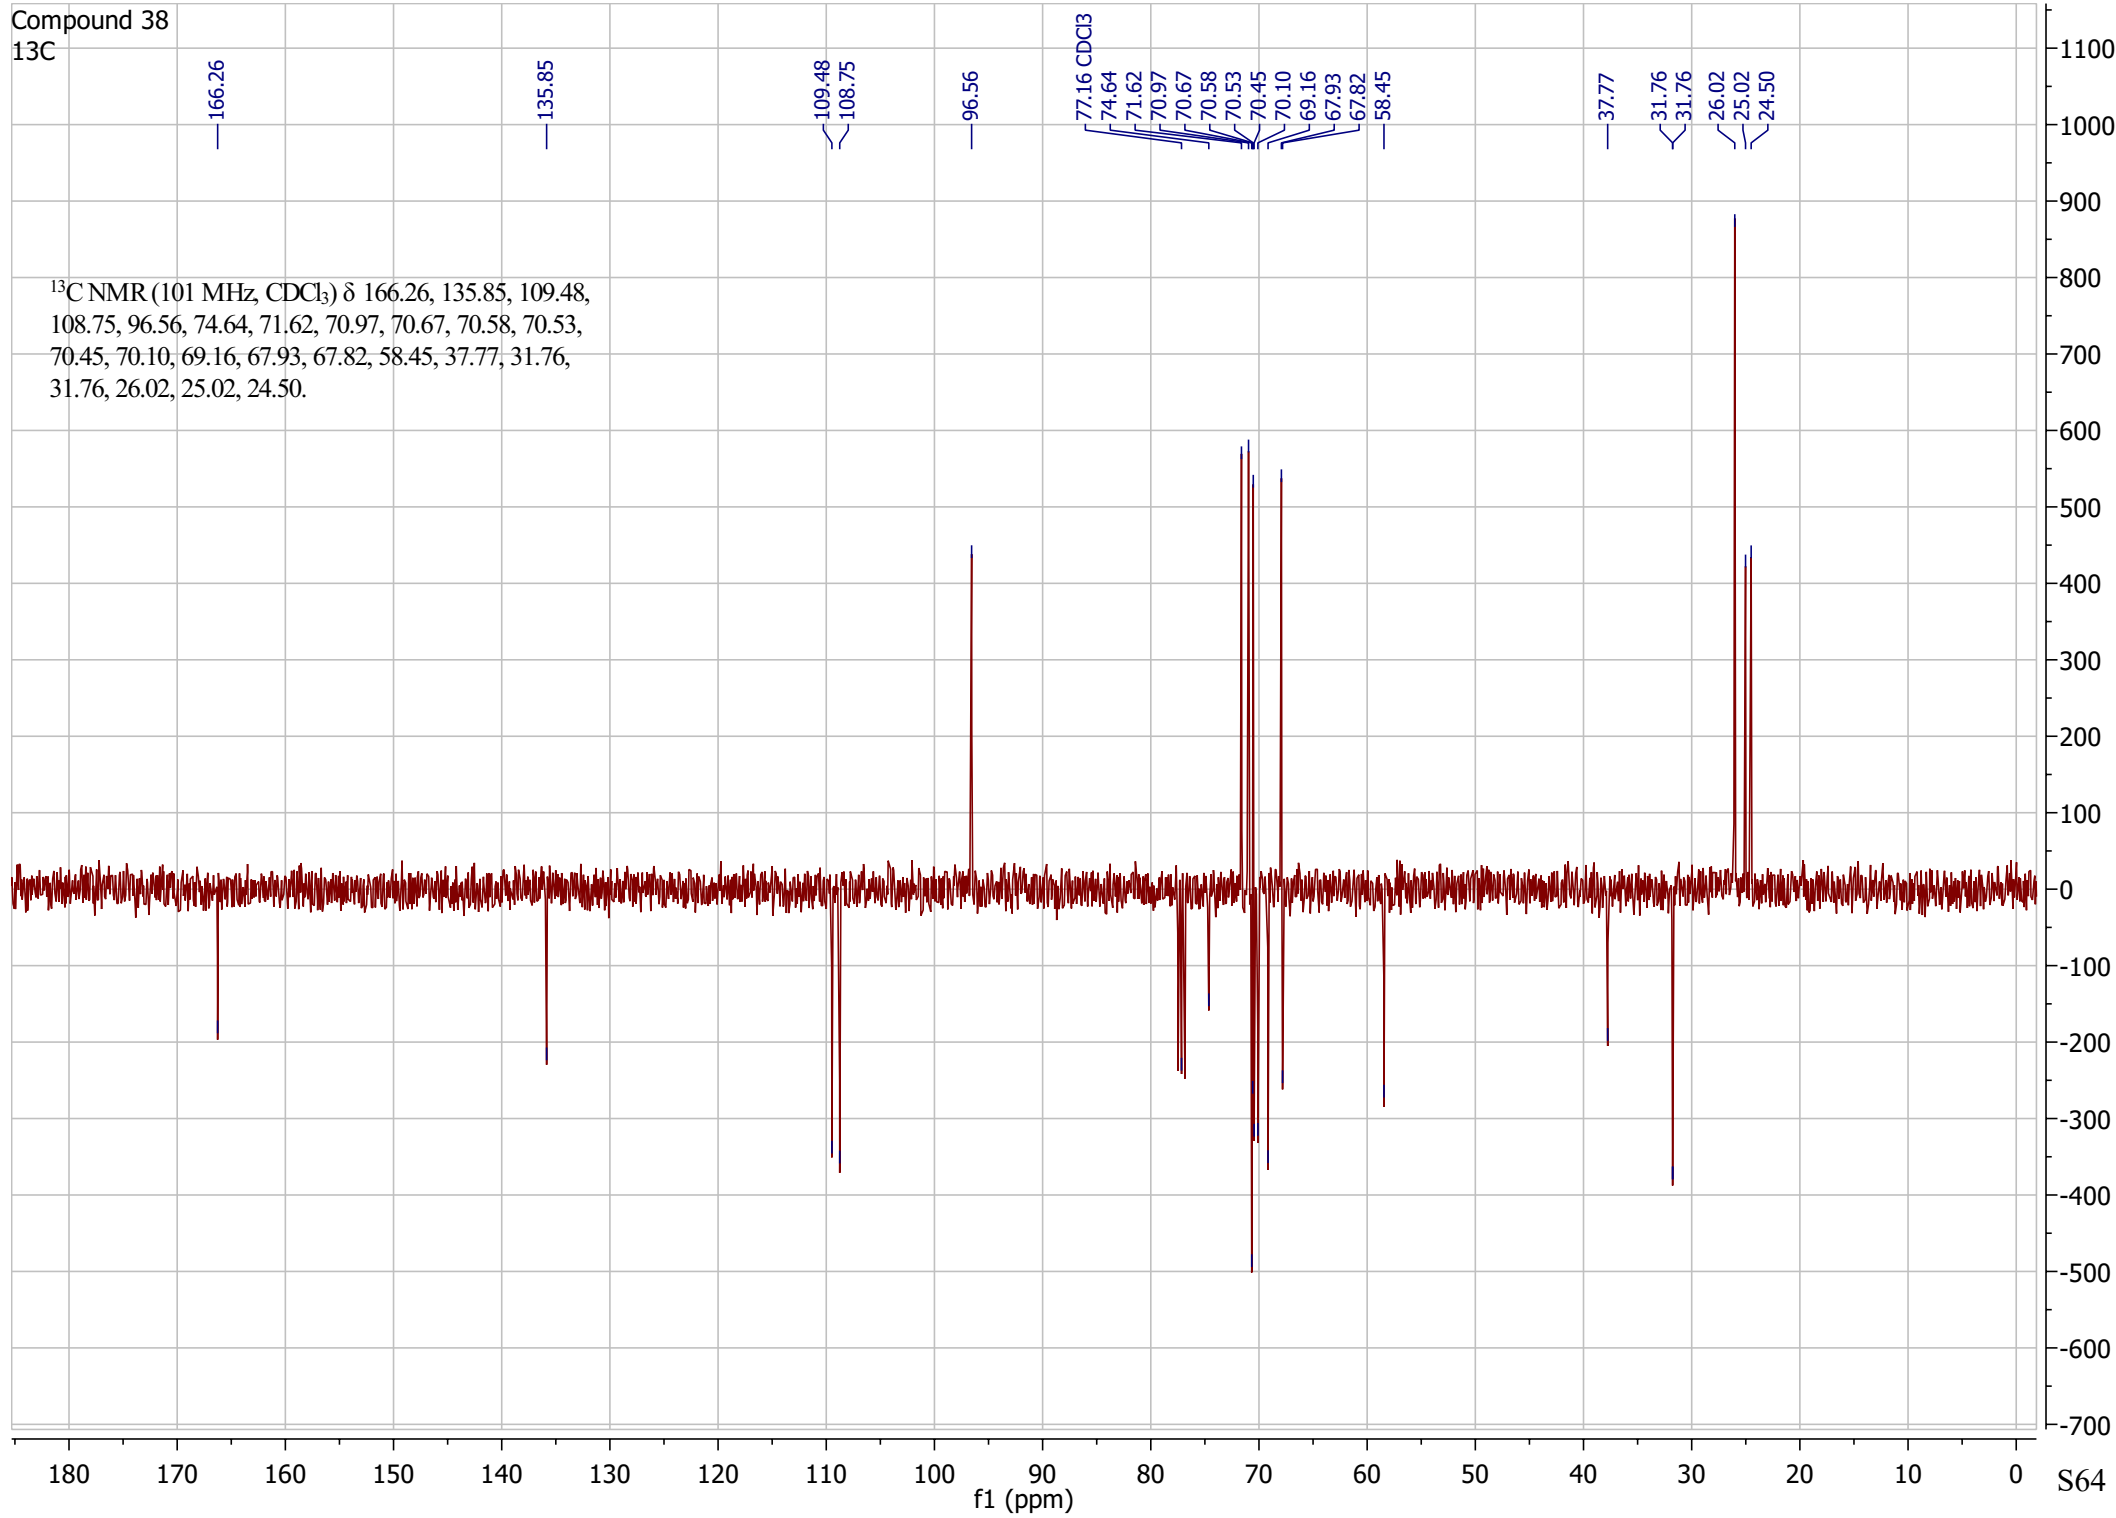

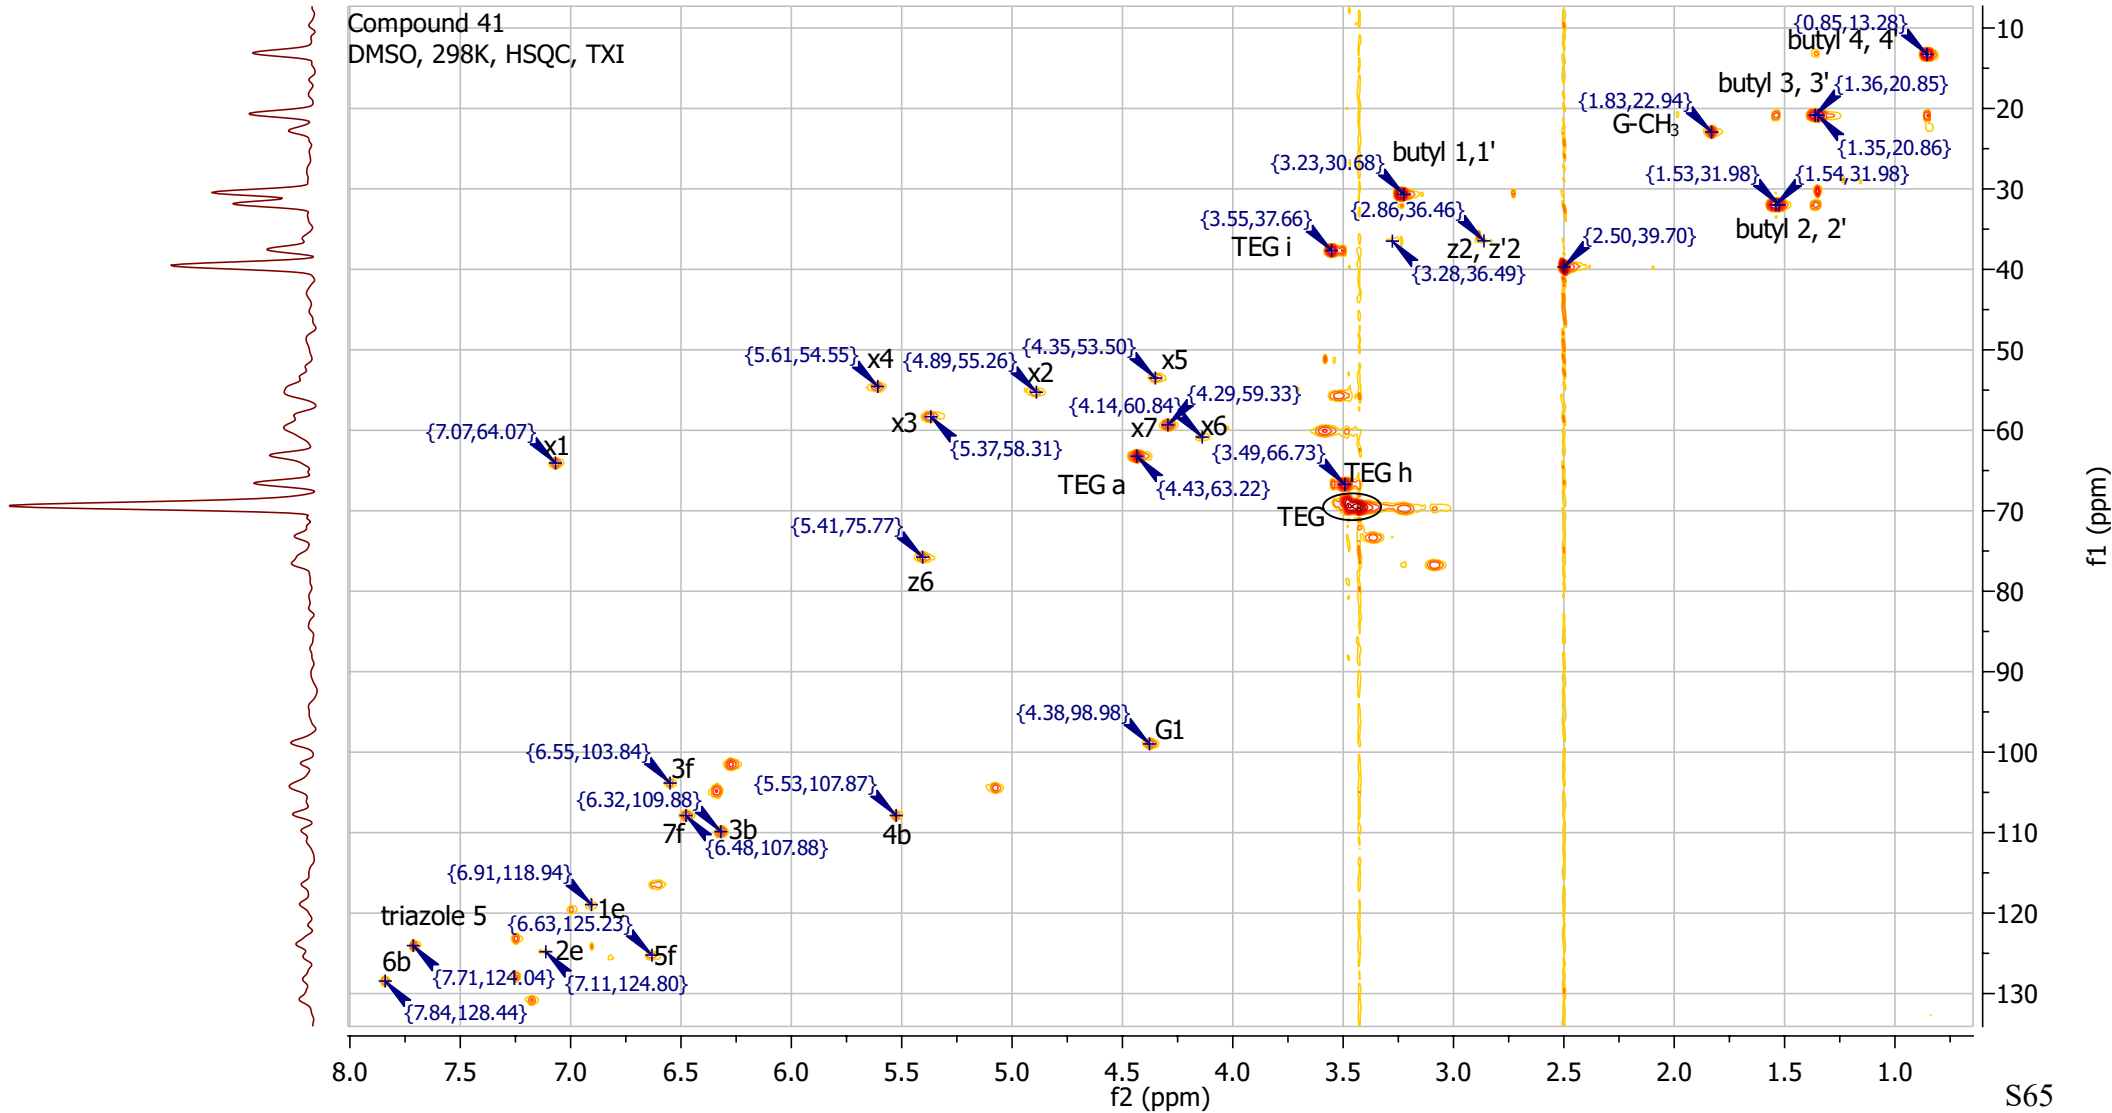

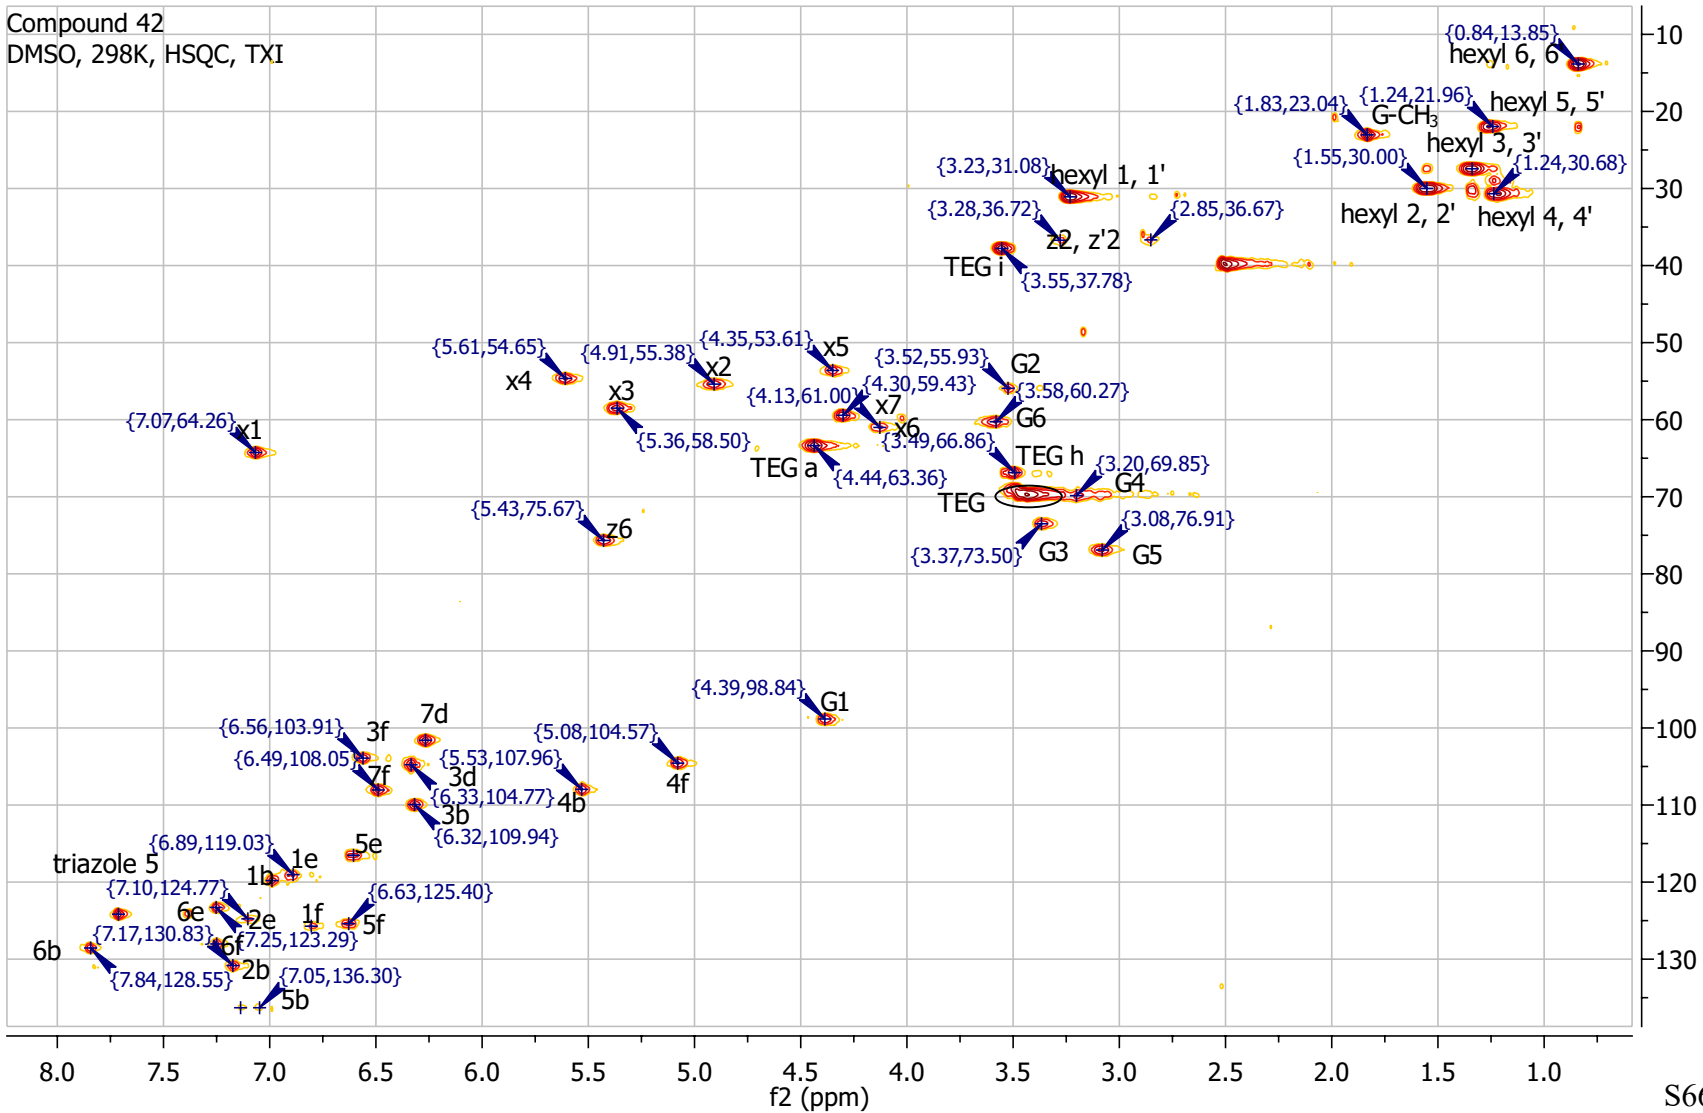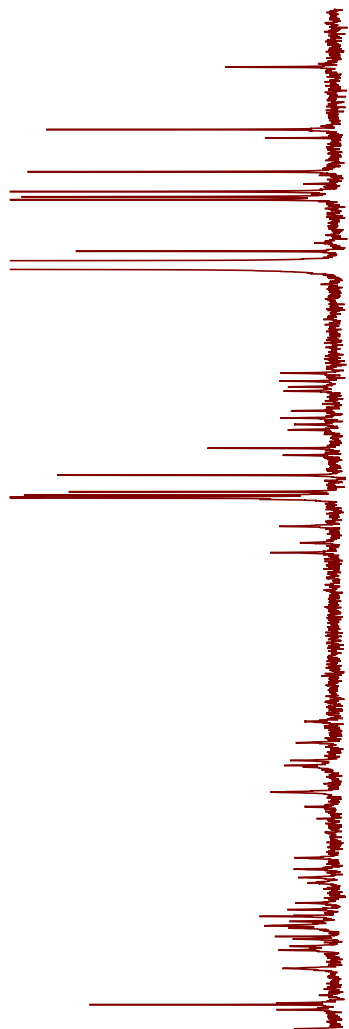

Compound 42  
DMSO, 298, 13C, TXI

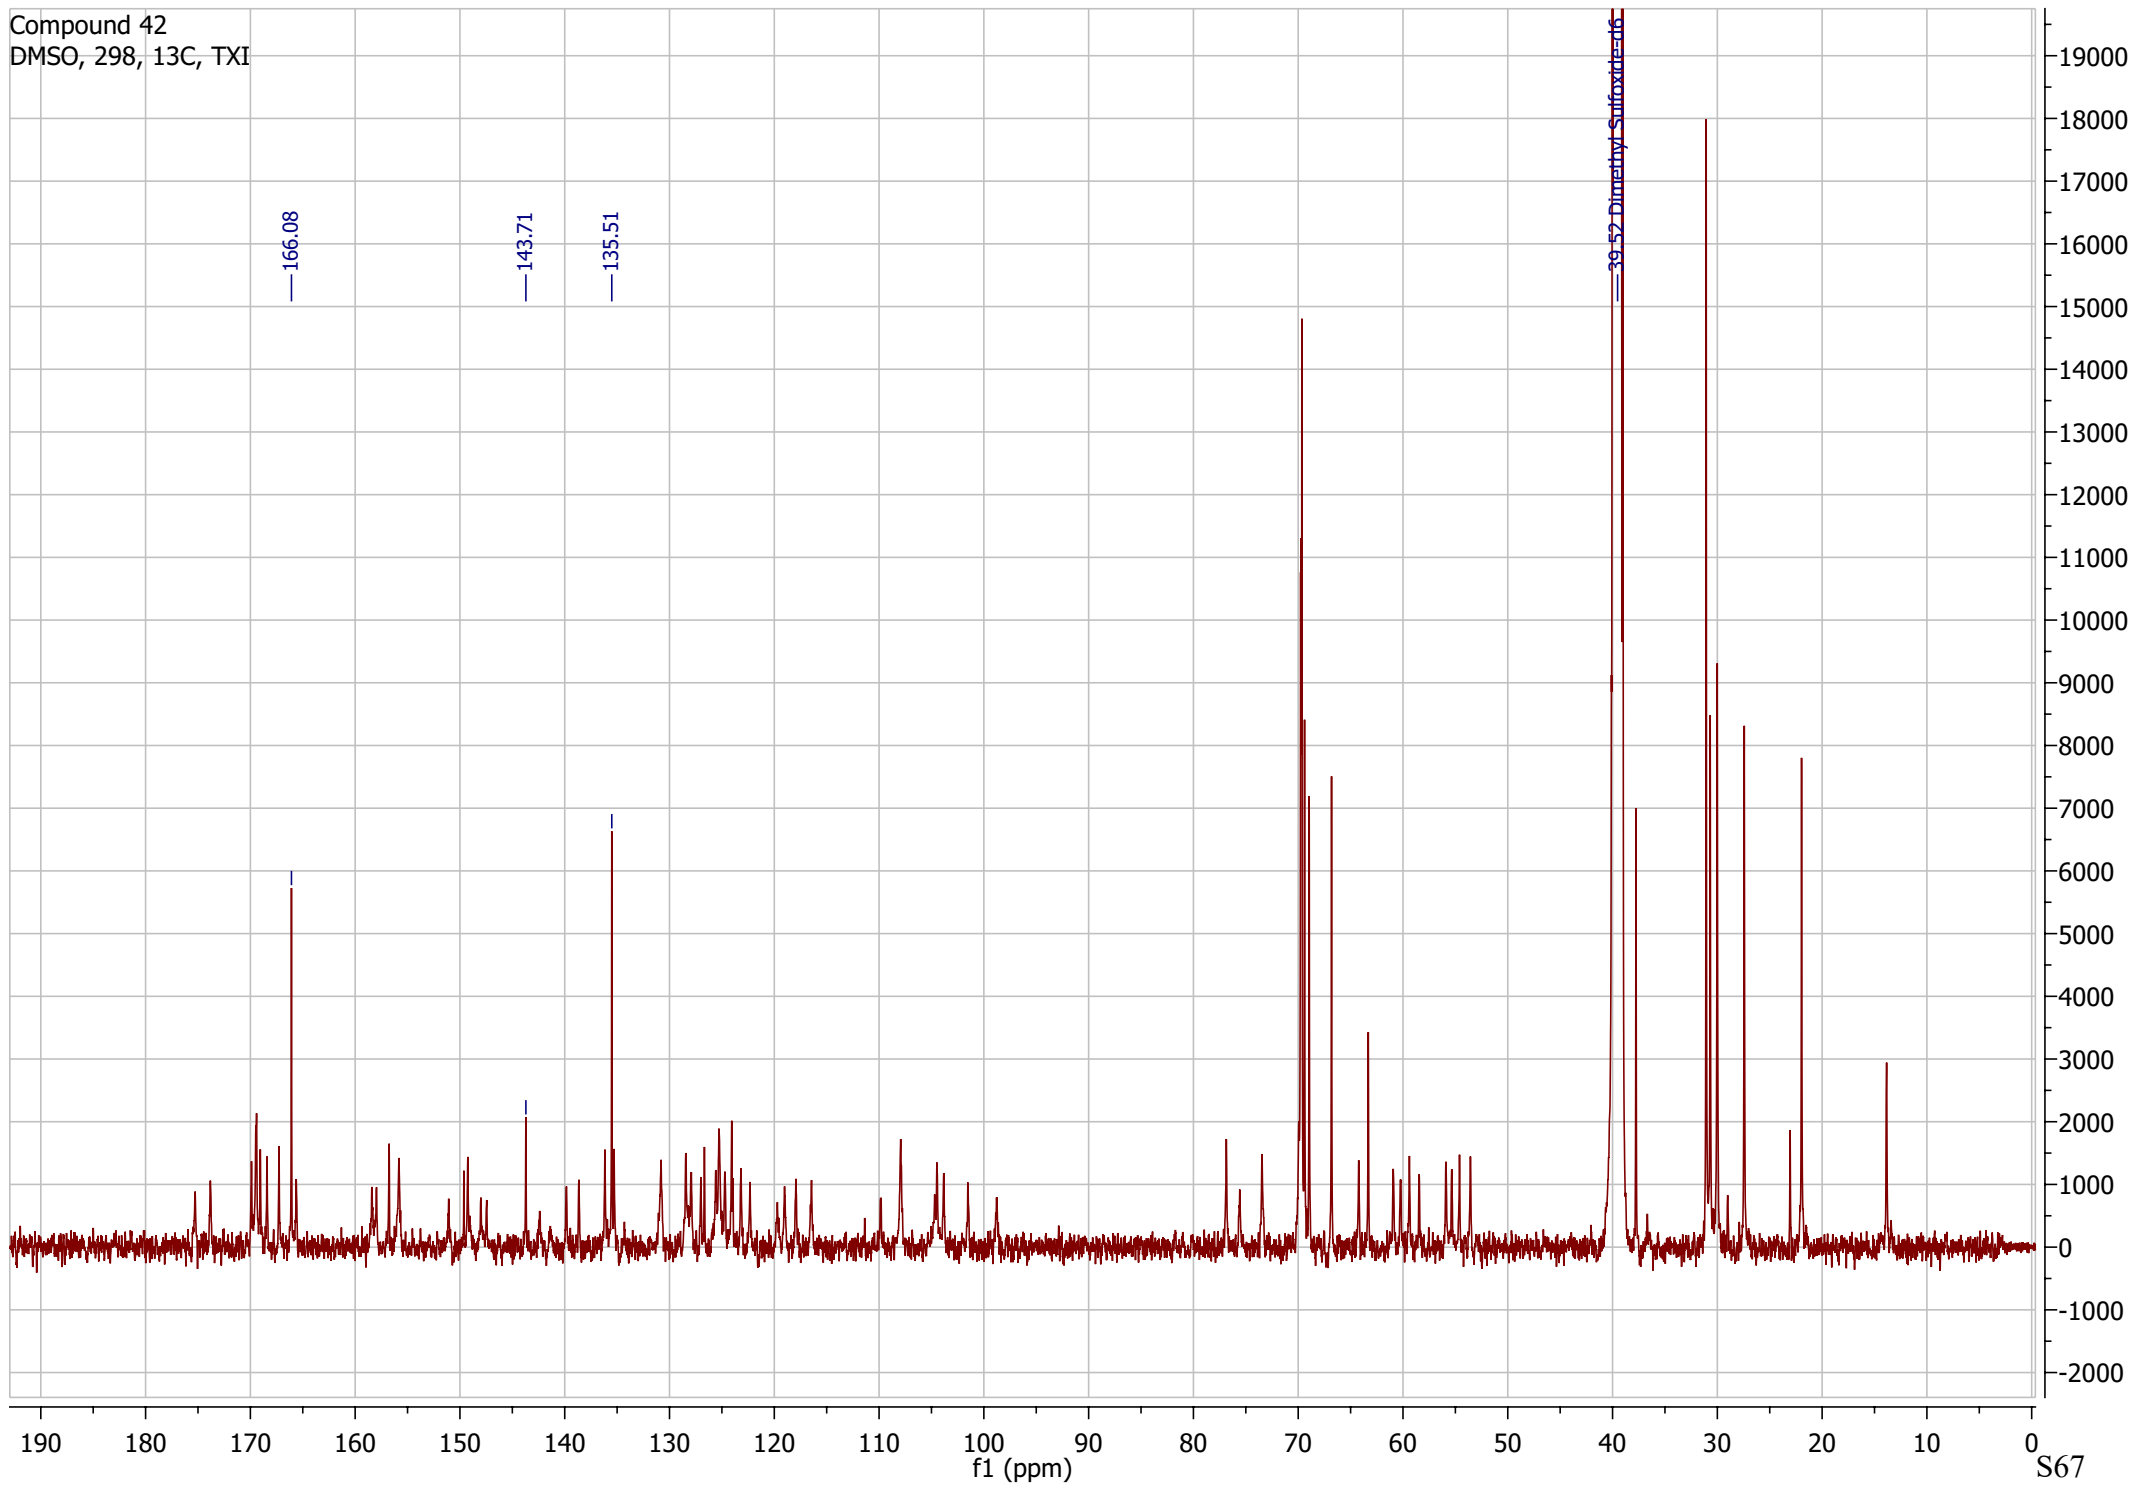

Compound 44  
DMSO, 300K, HSQC, TXI

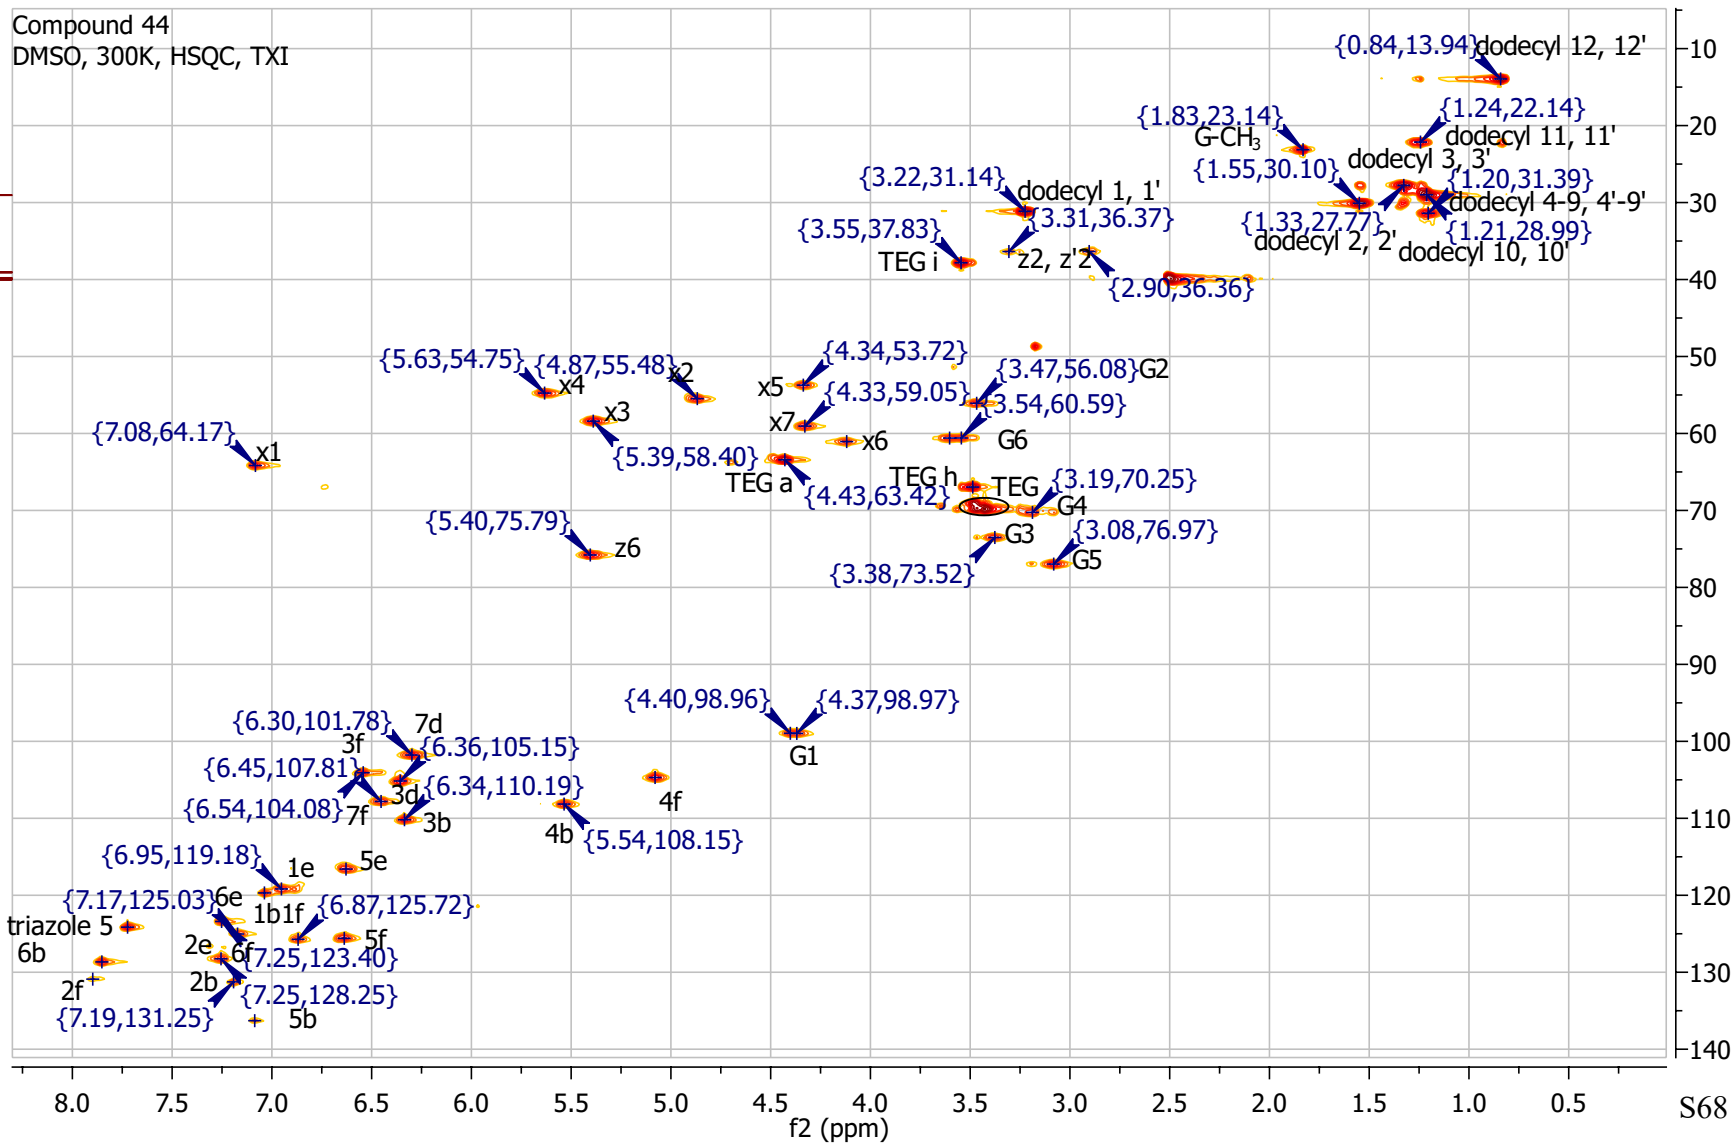



Compound 44  
DMSO, 300K, 13C, TXI

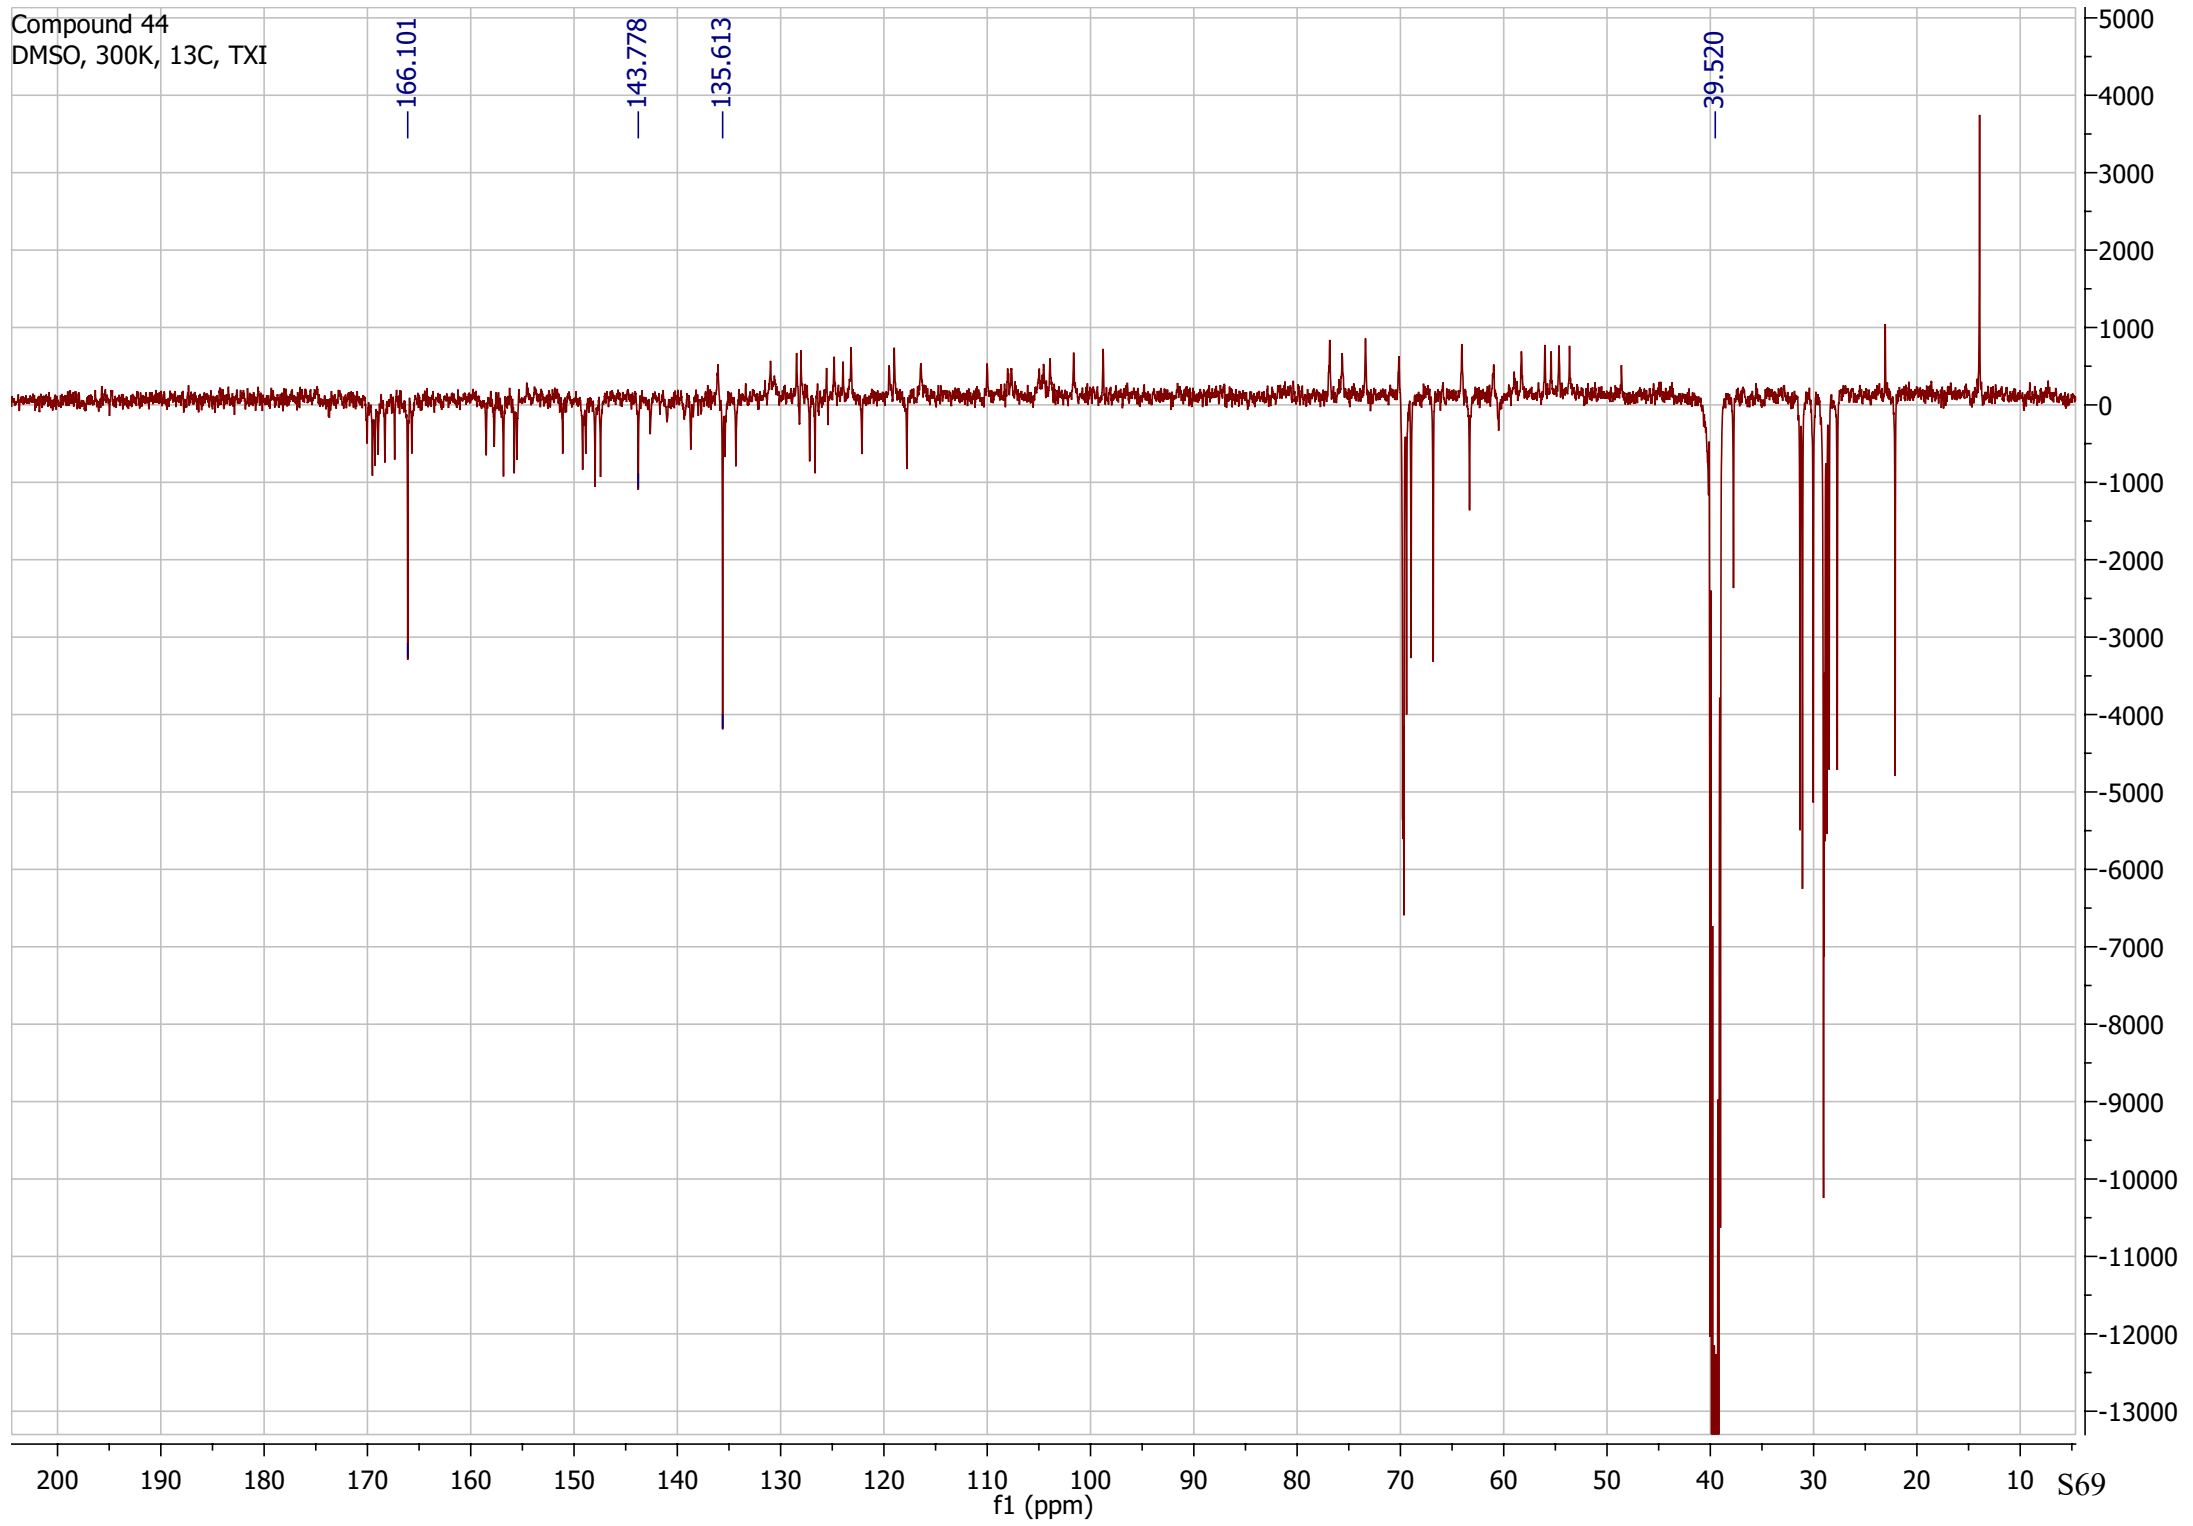

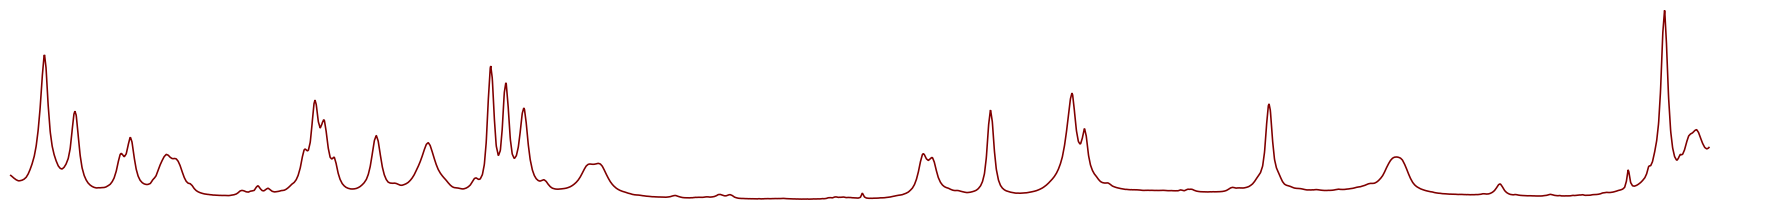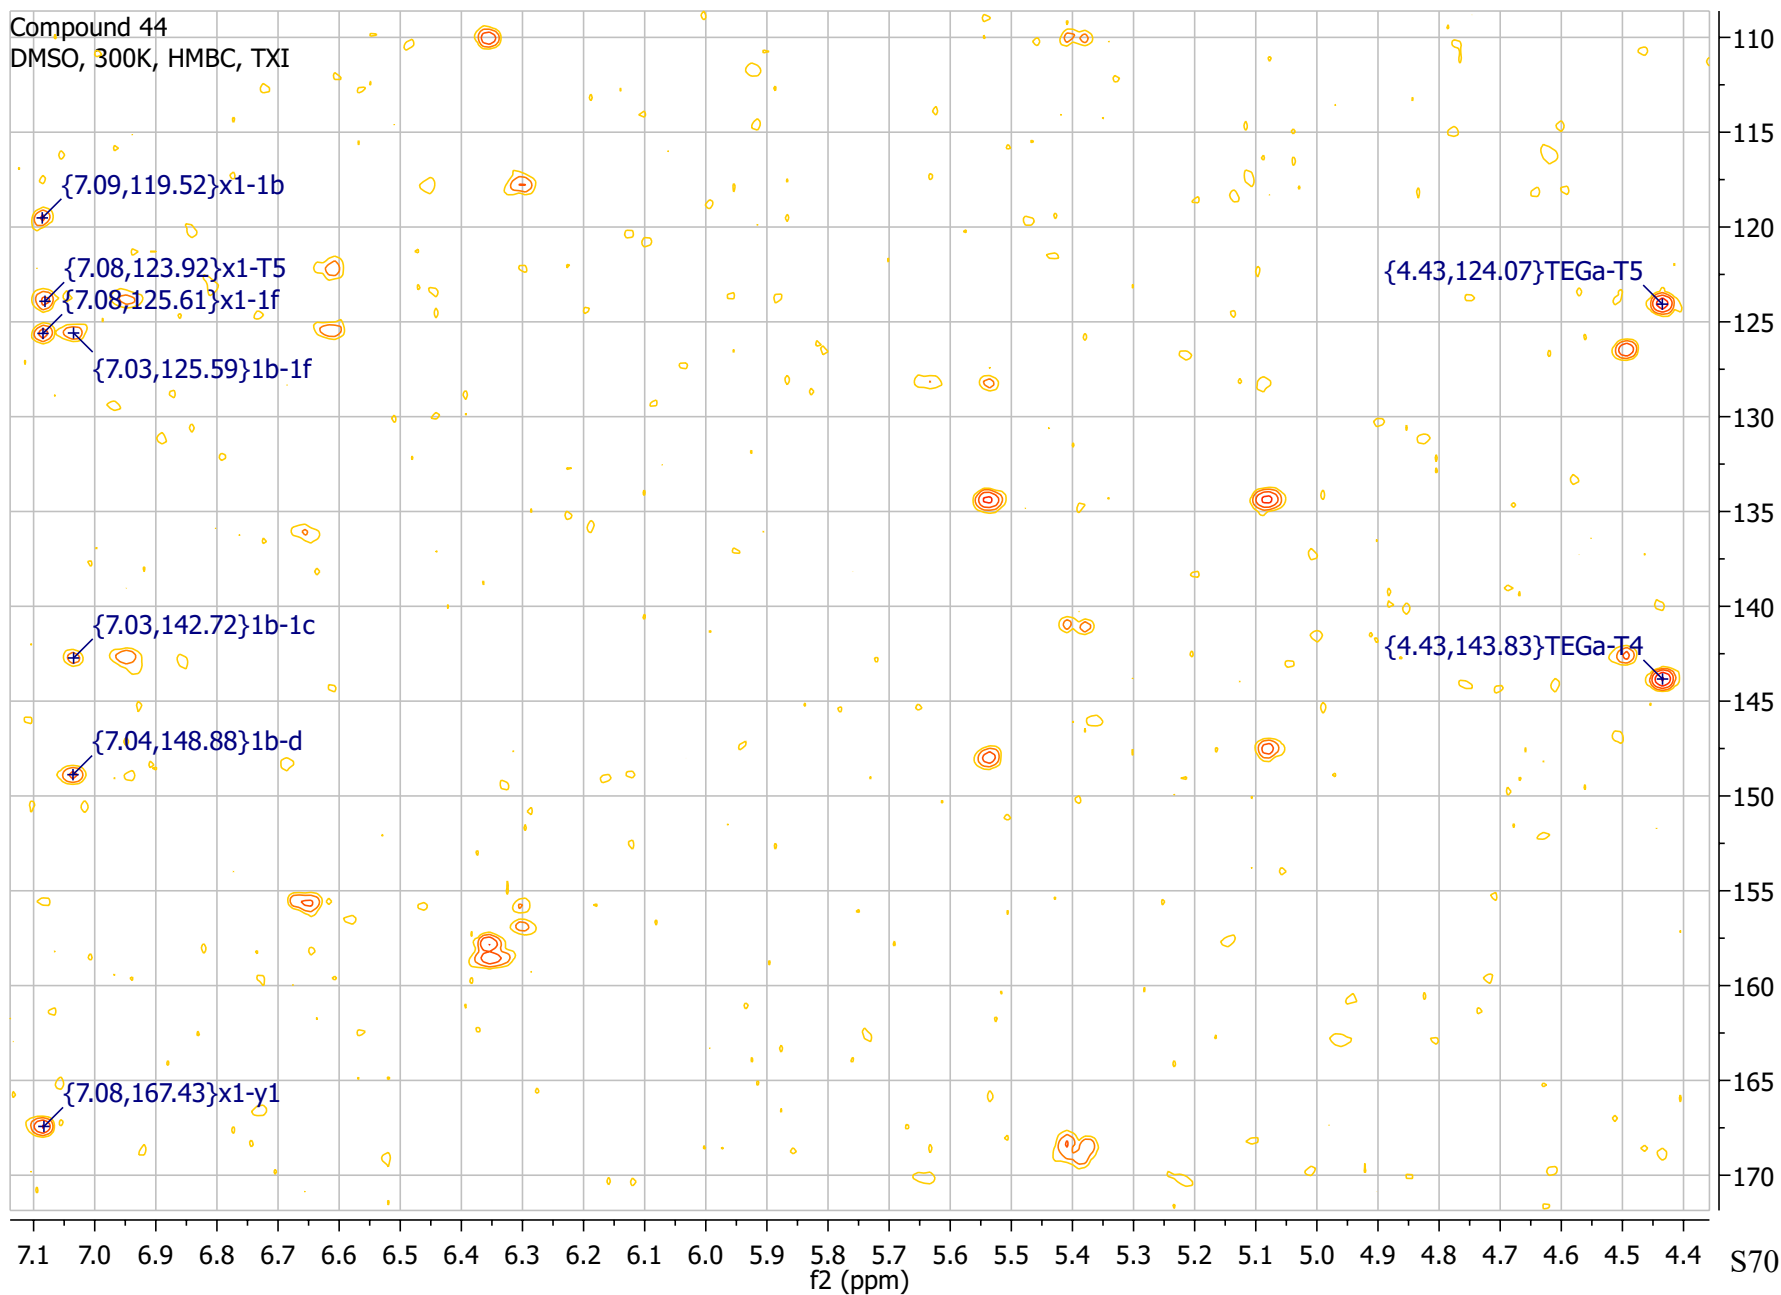

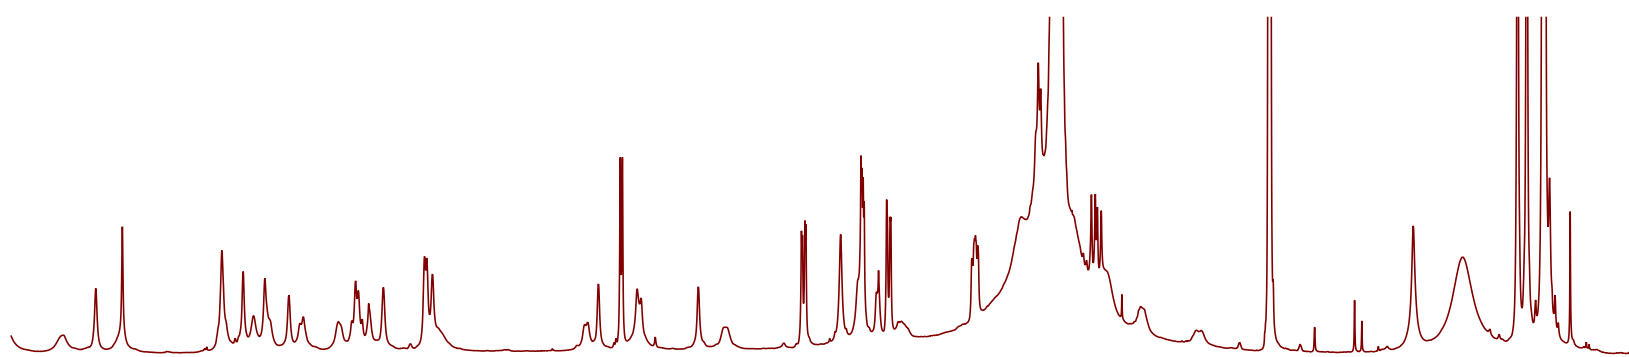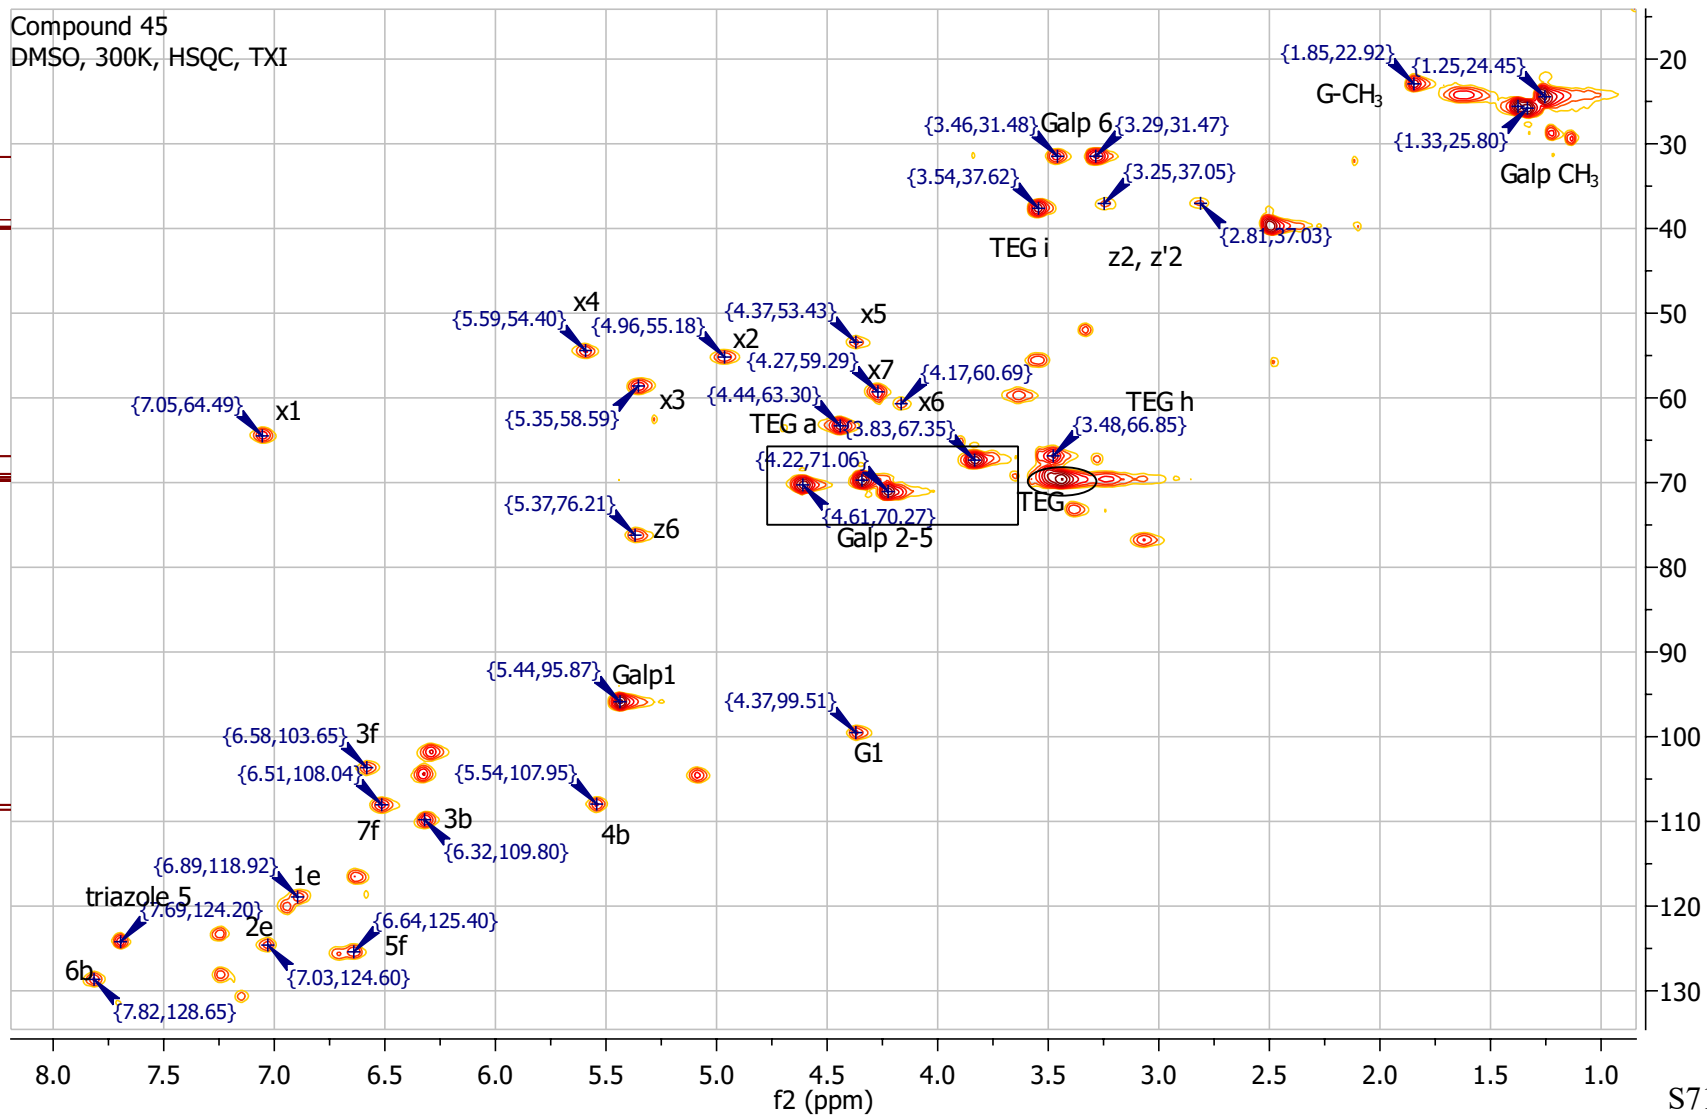

Compound 45  
DMSO, 298K, 13C, TXI

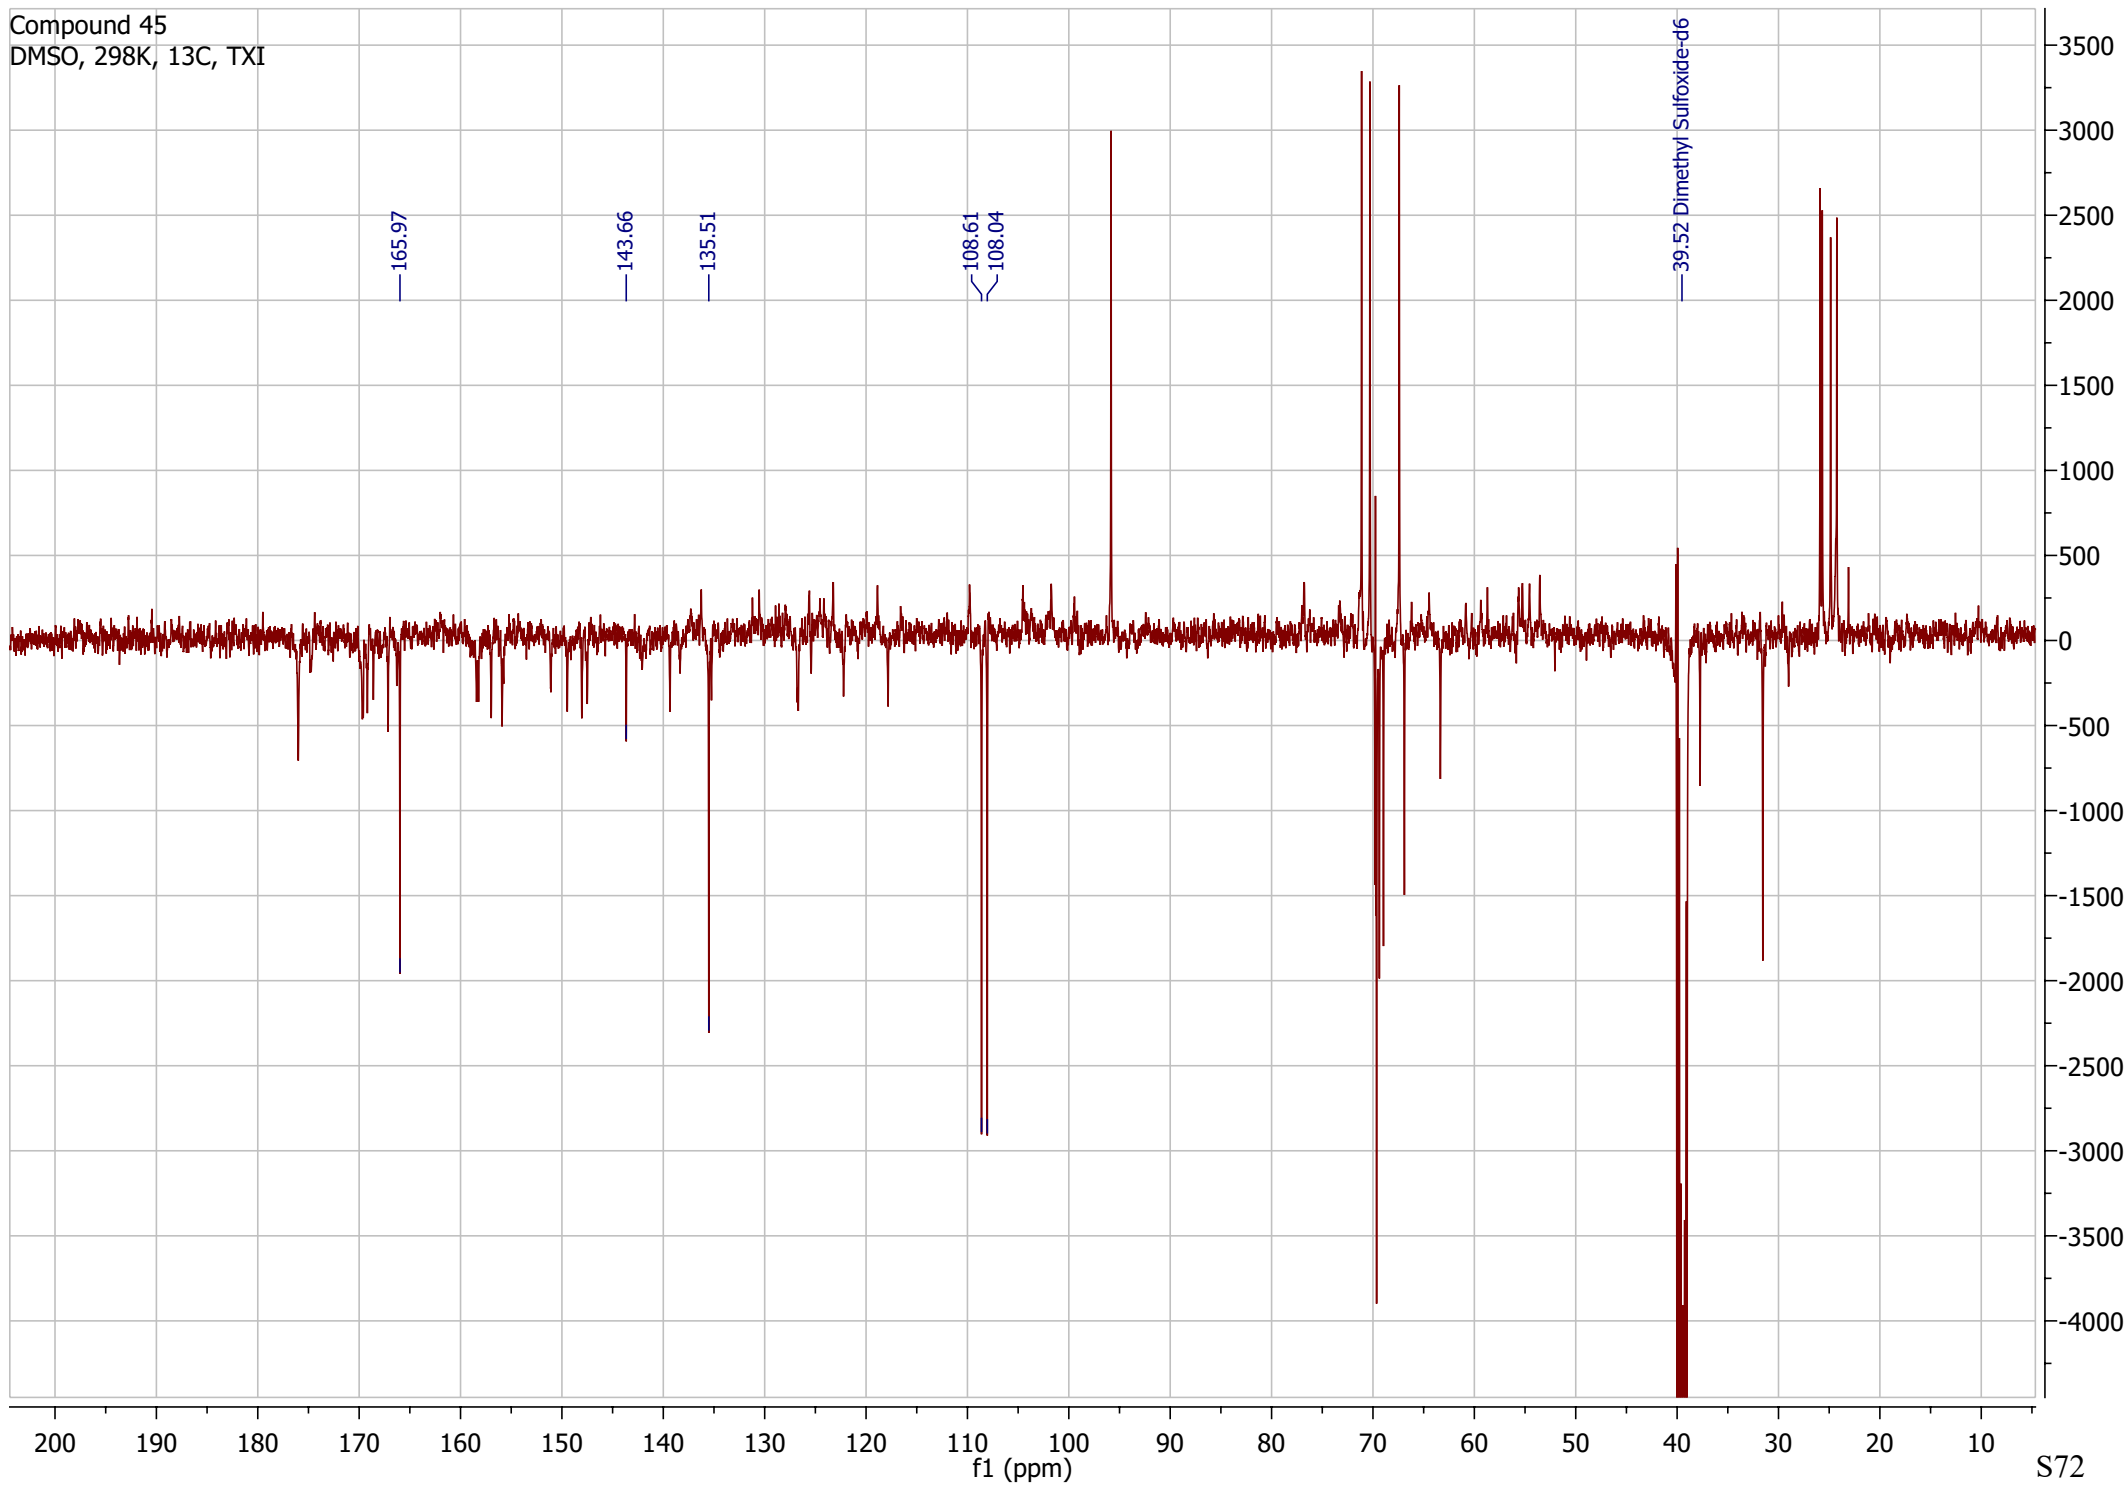

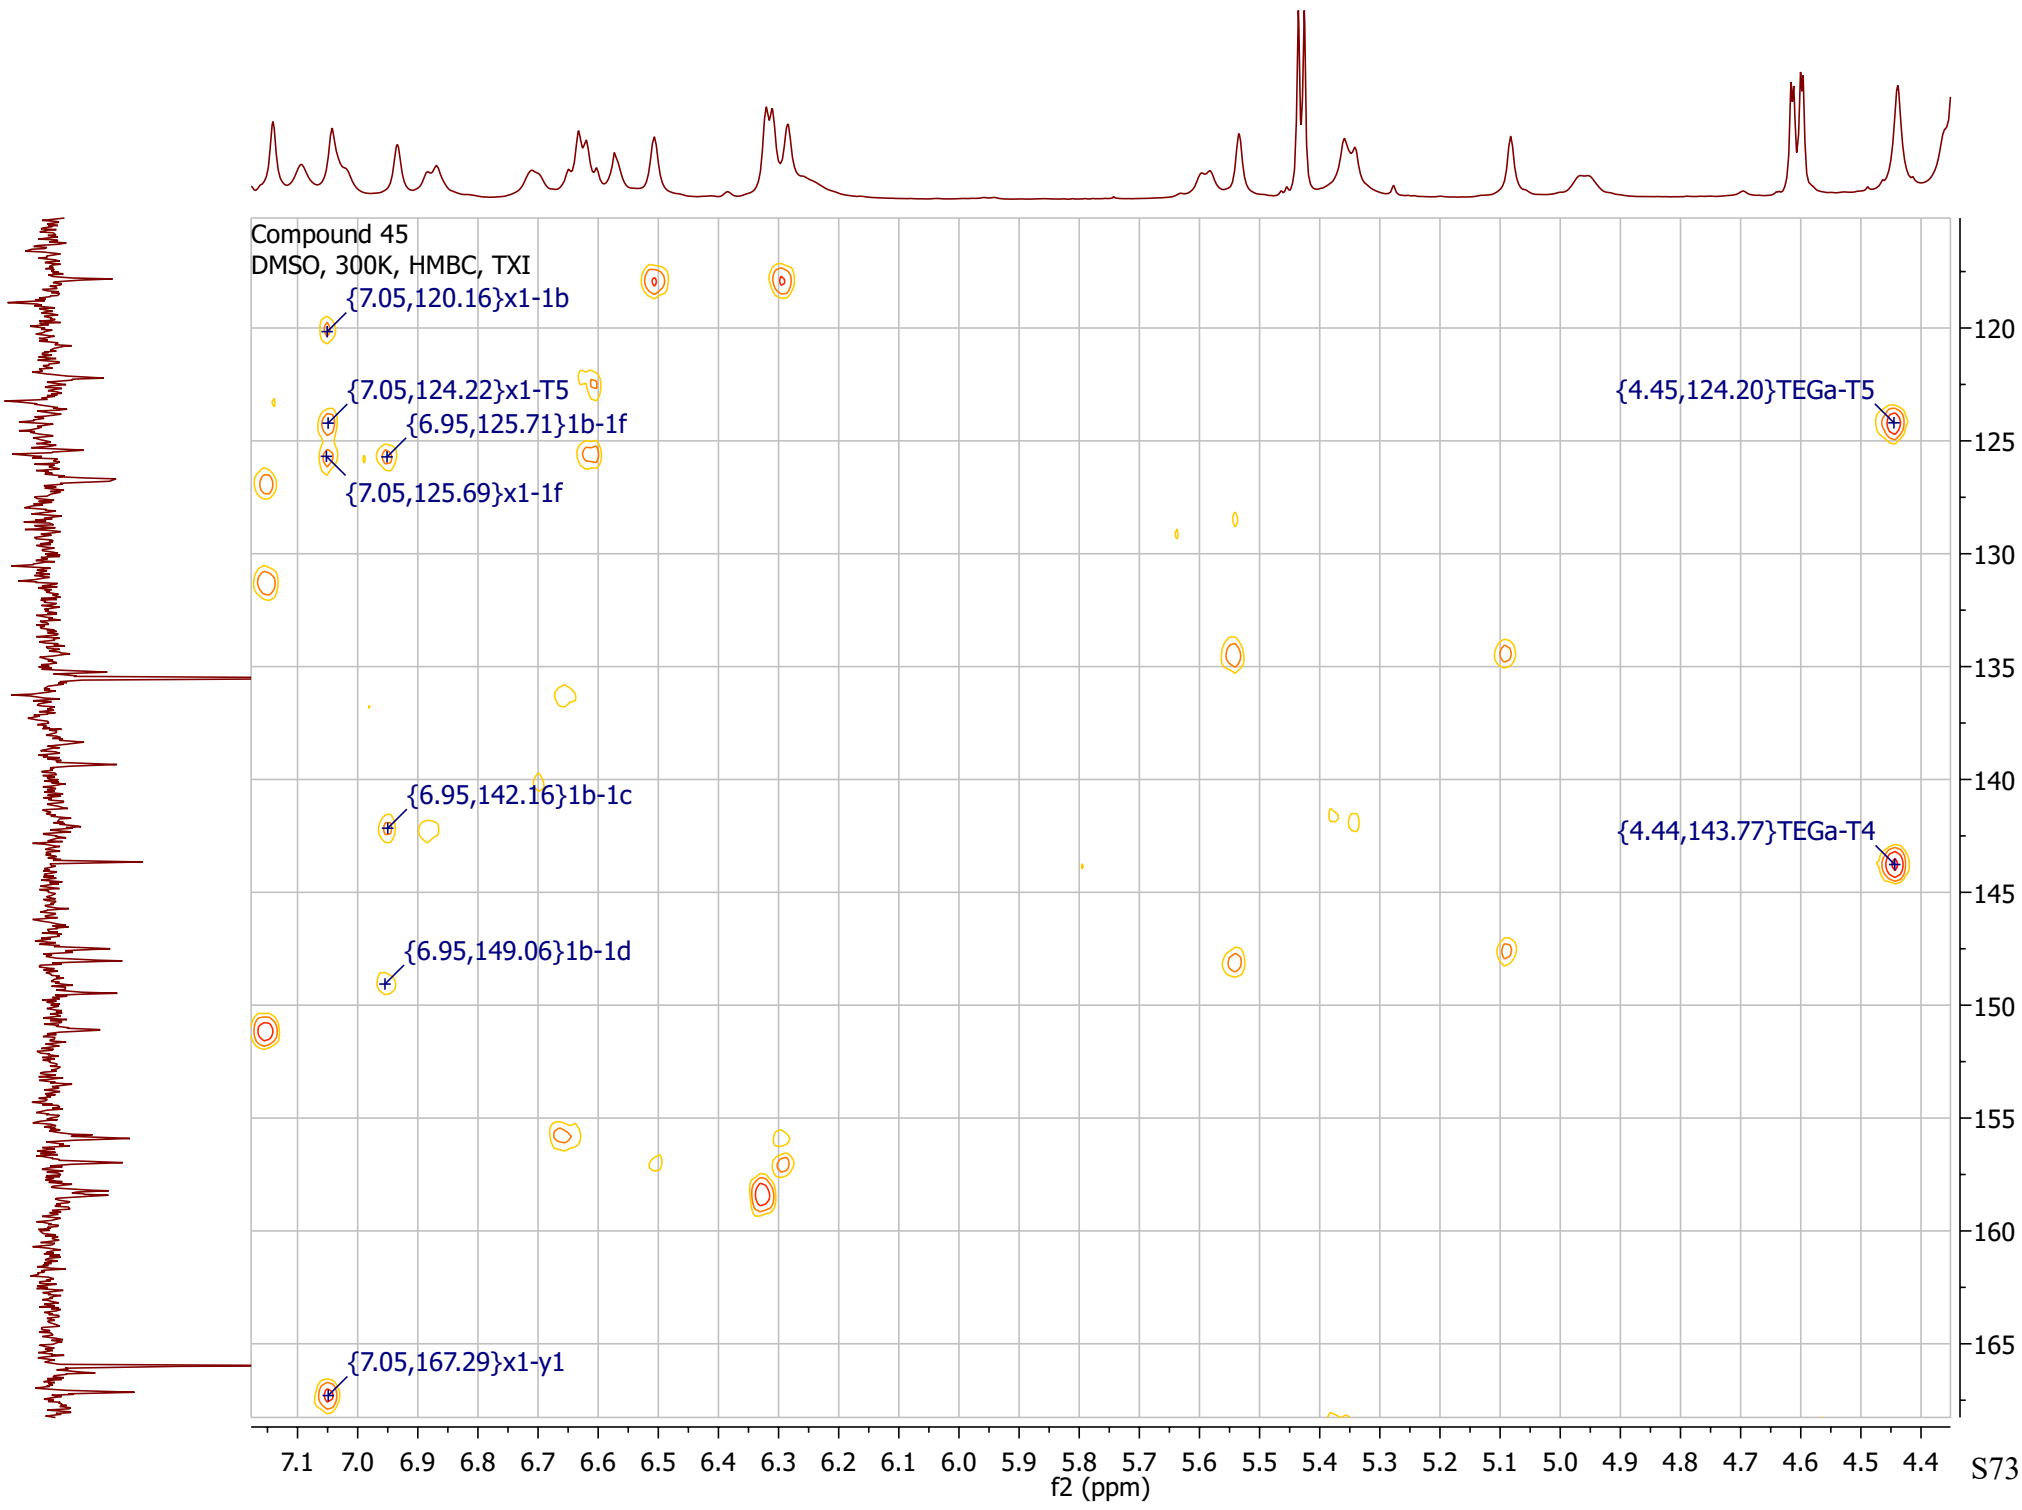

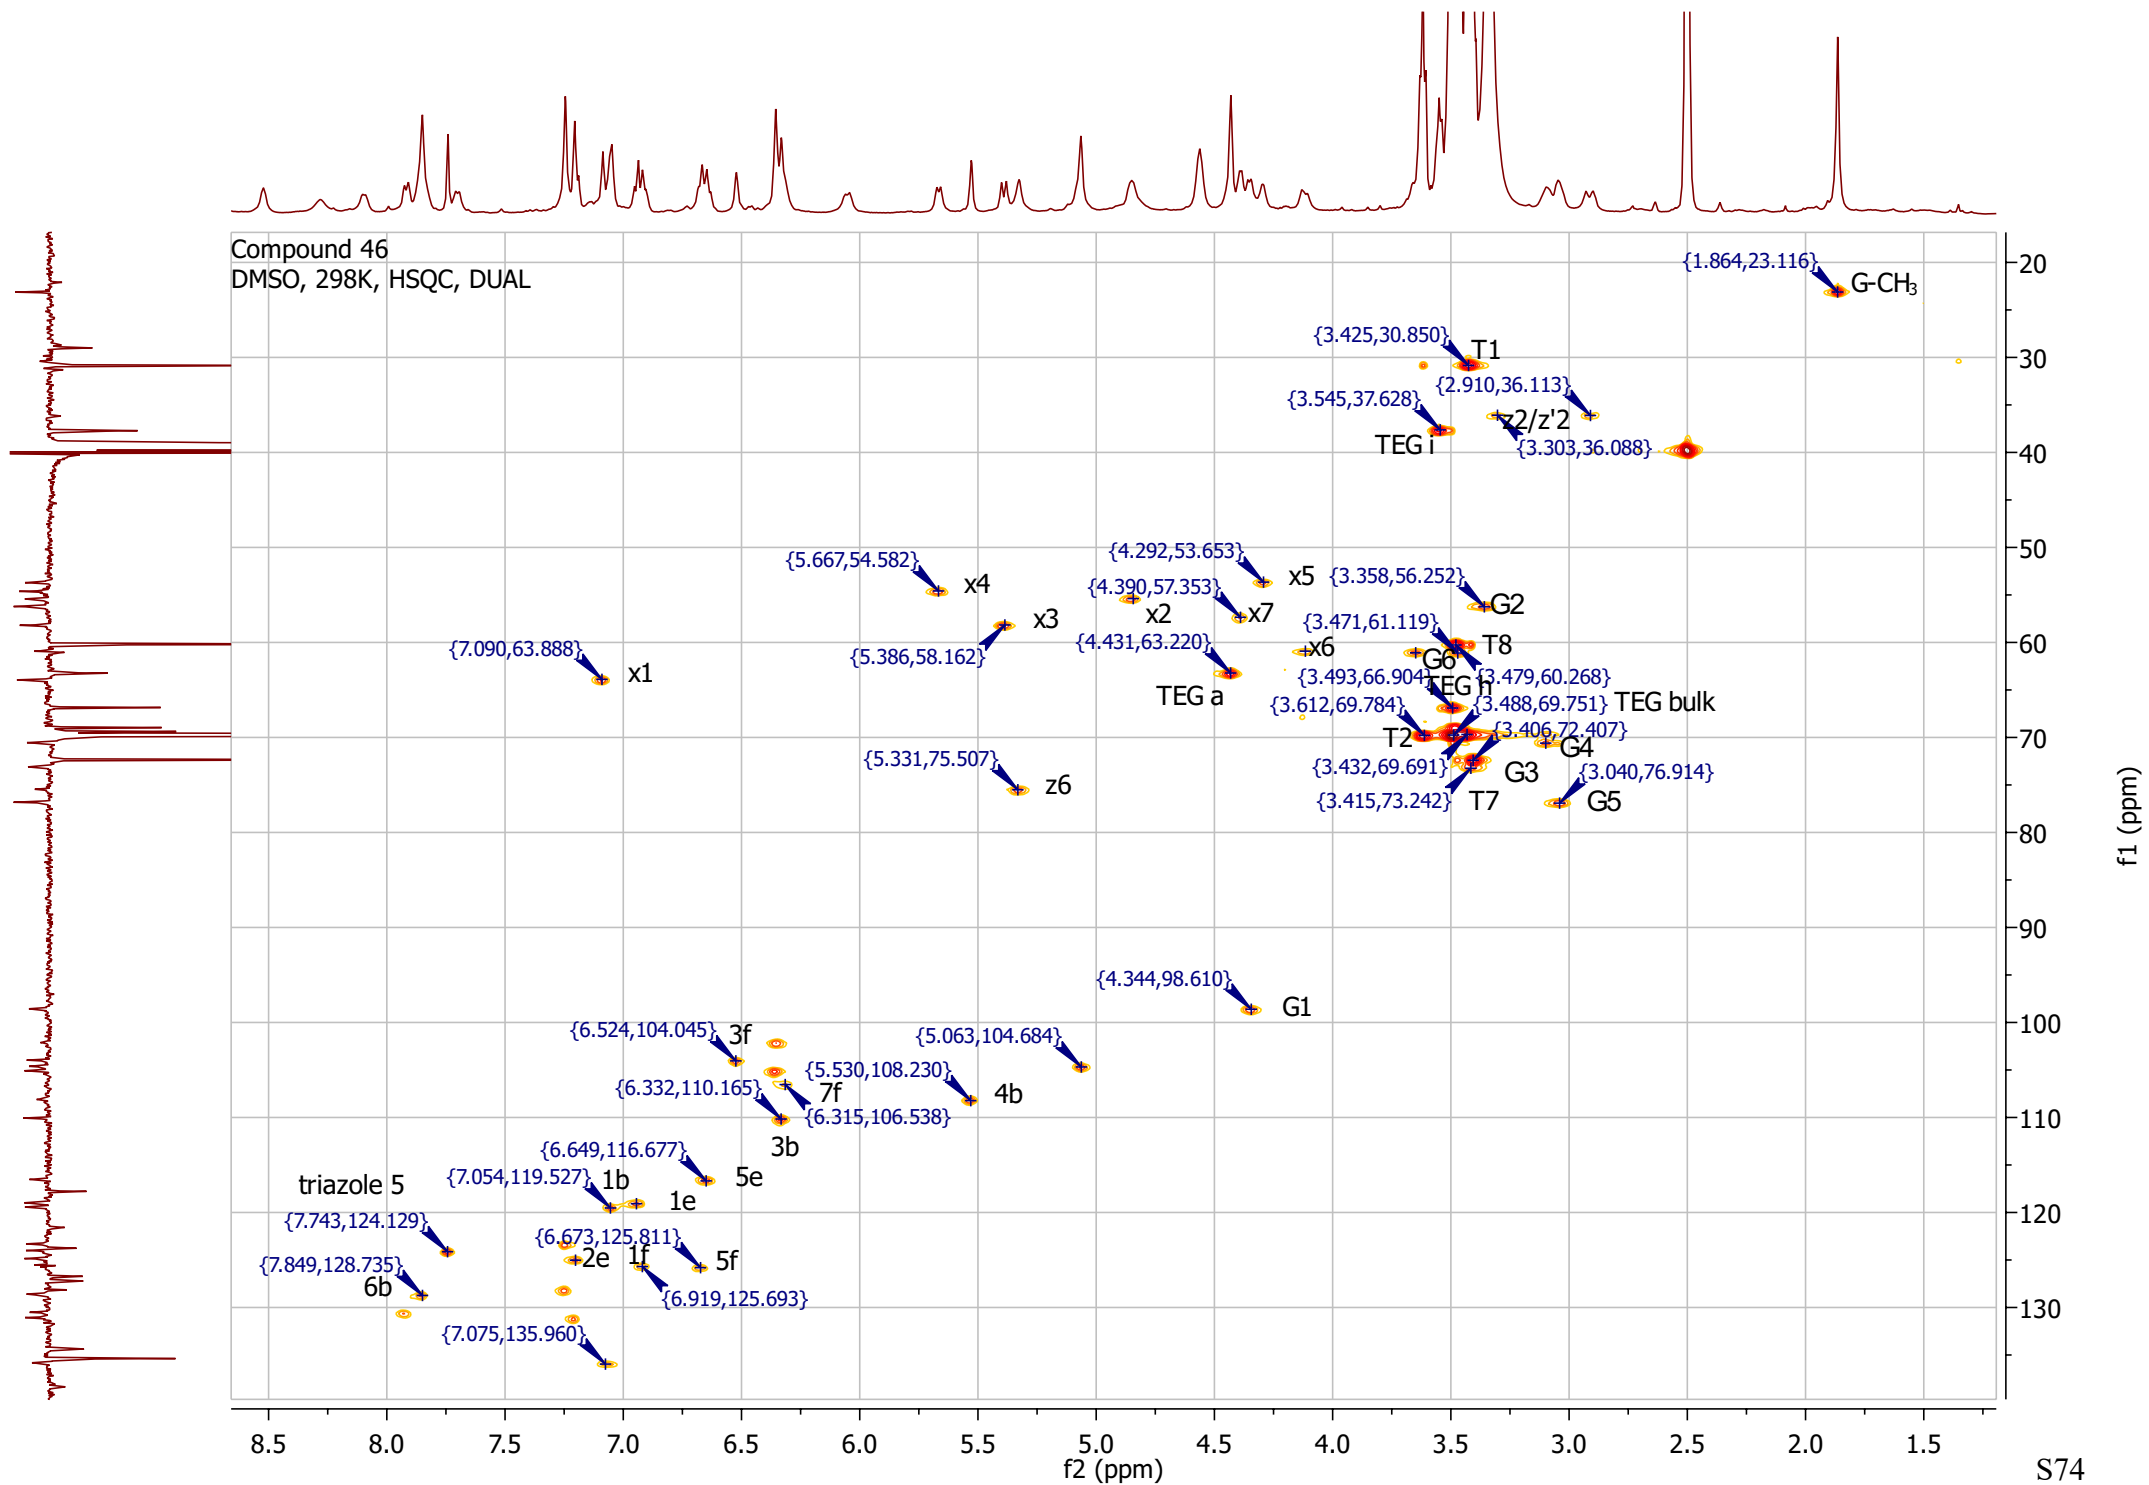

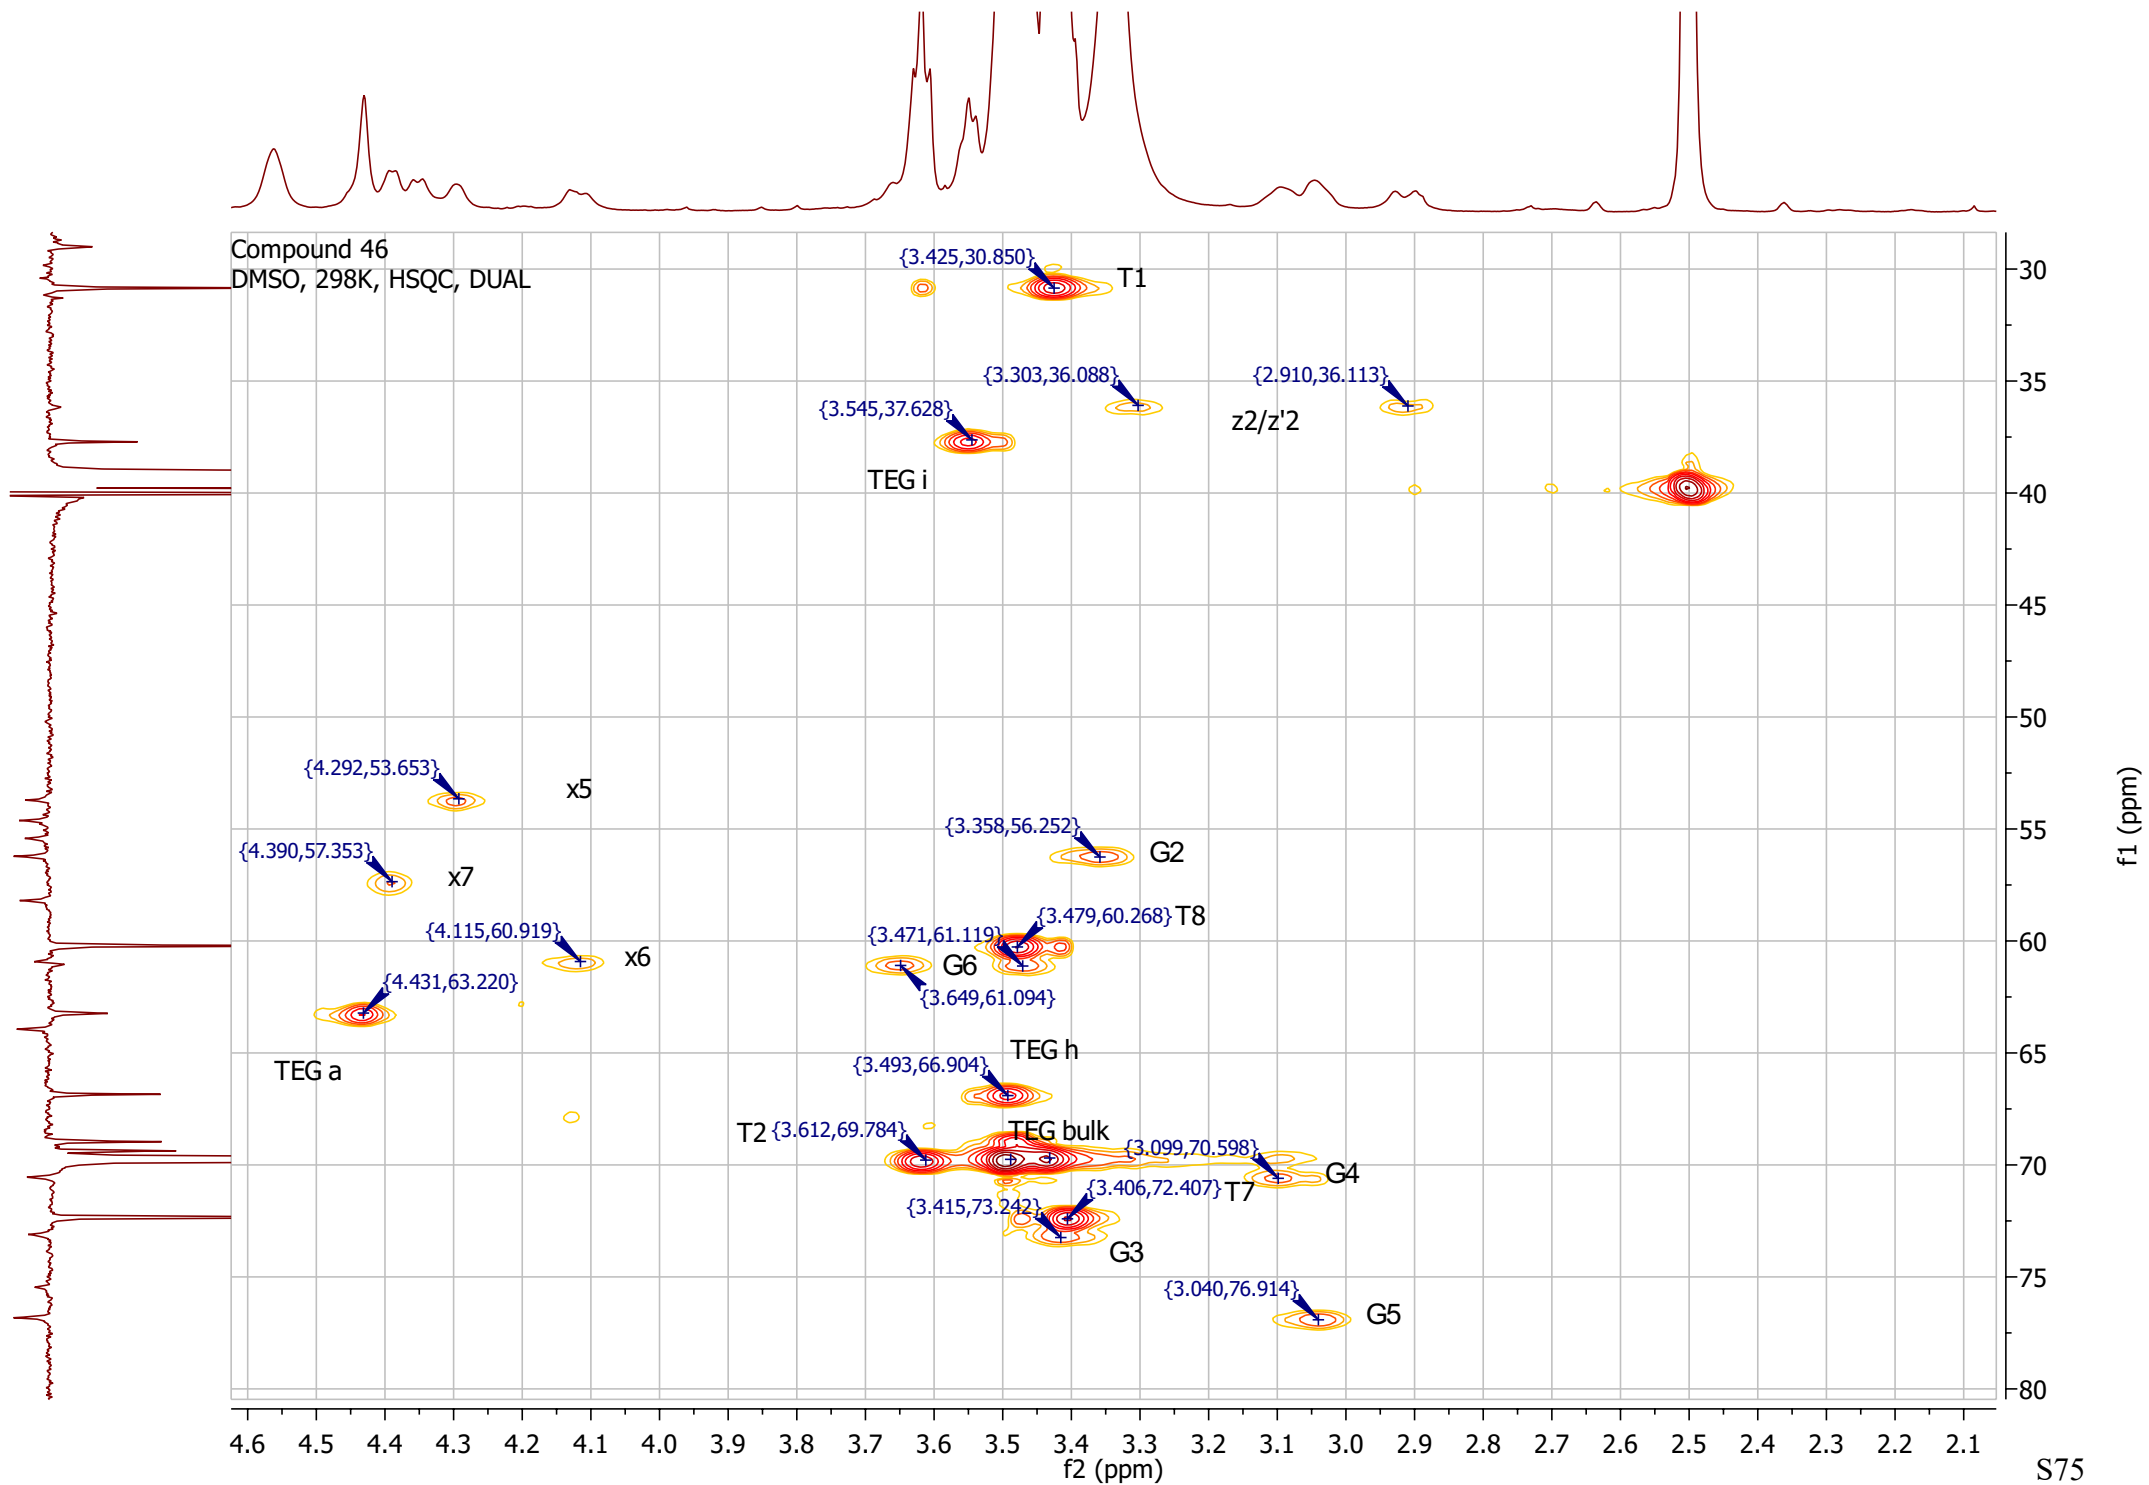

Compound 46  
DMSO, 298K, 13C, DUAL

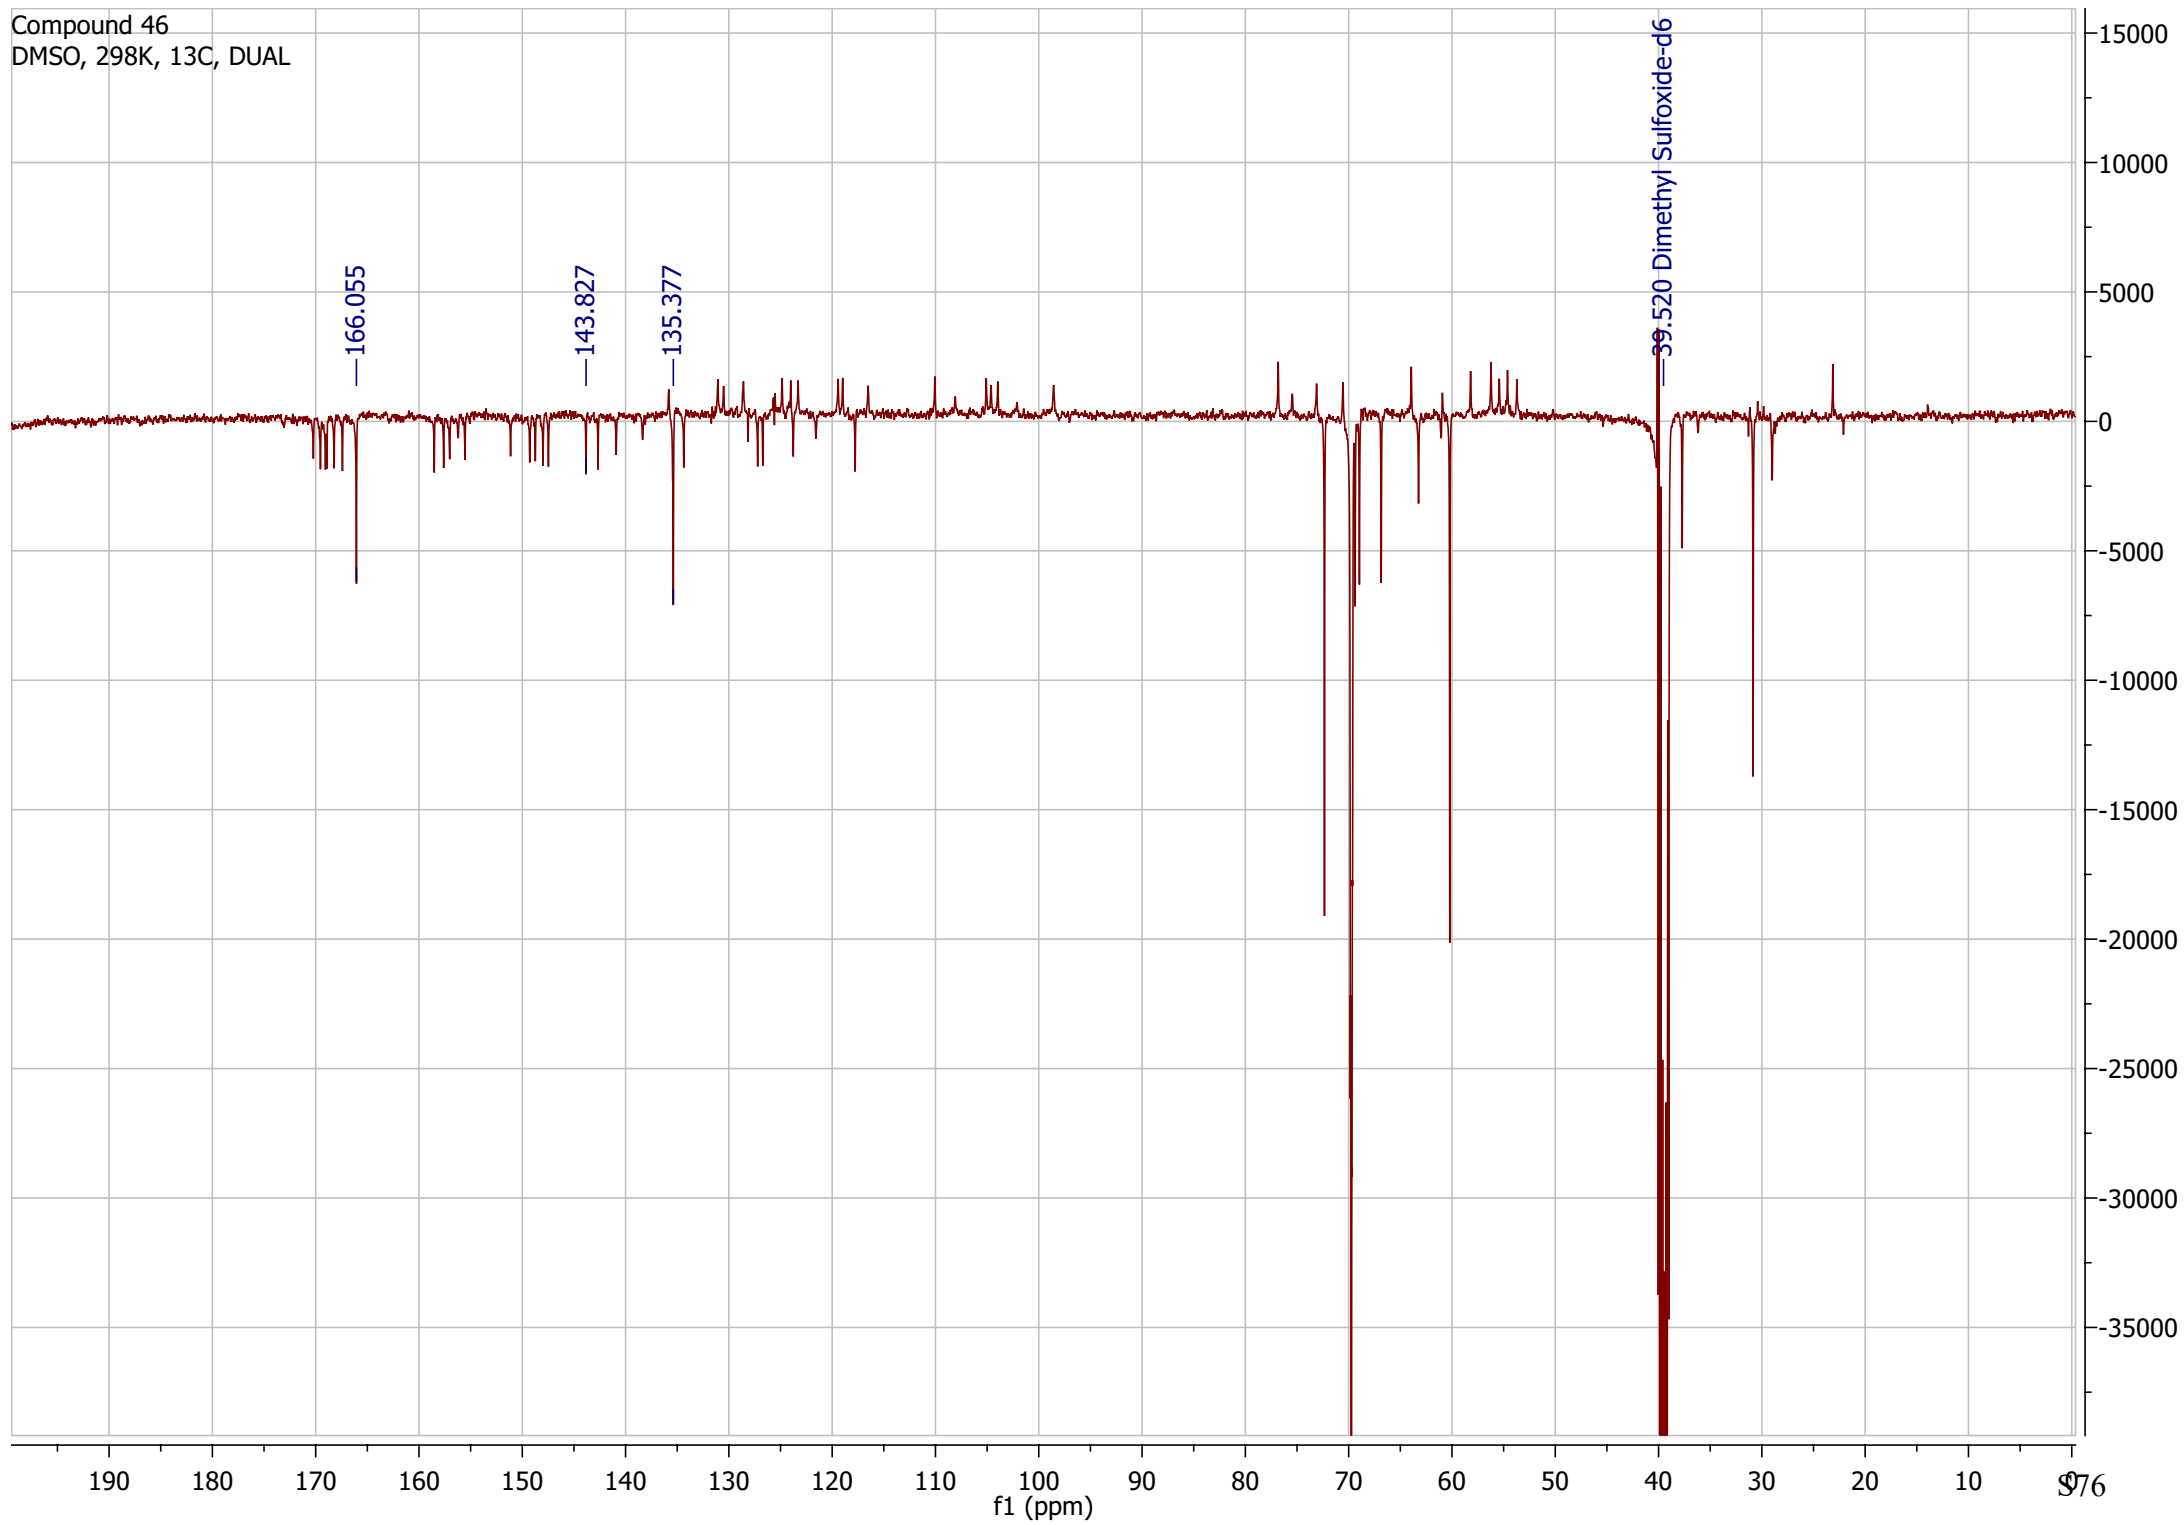



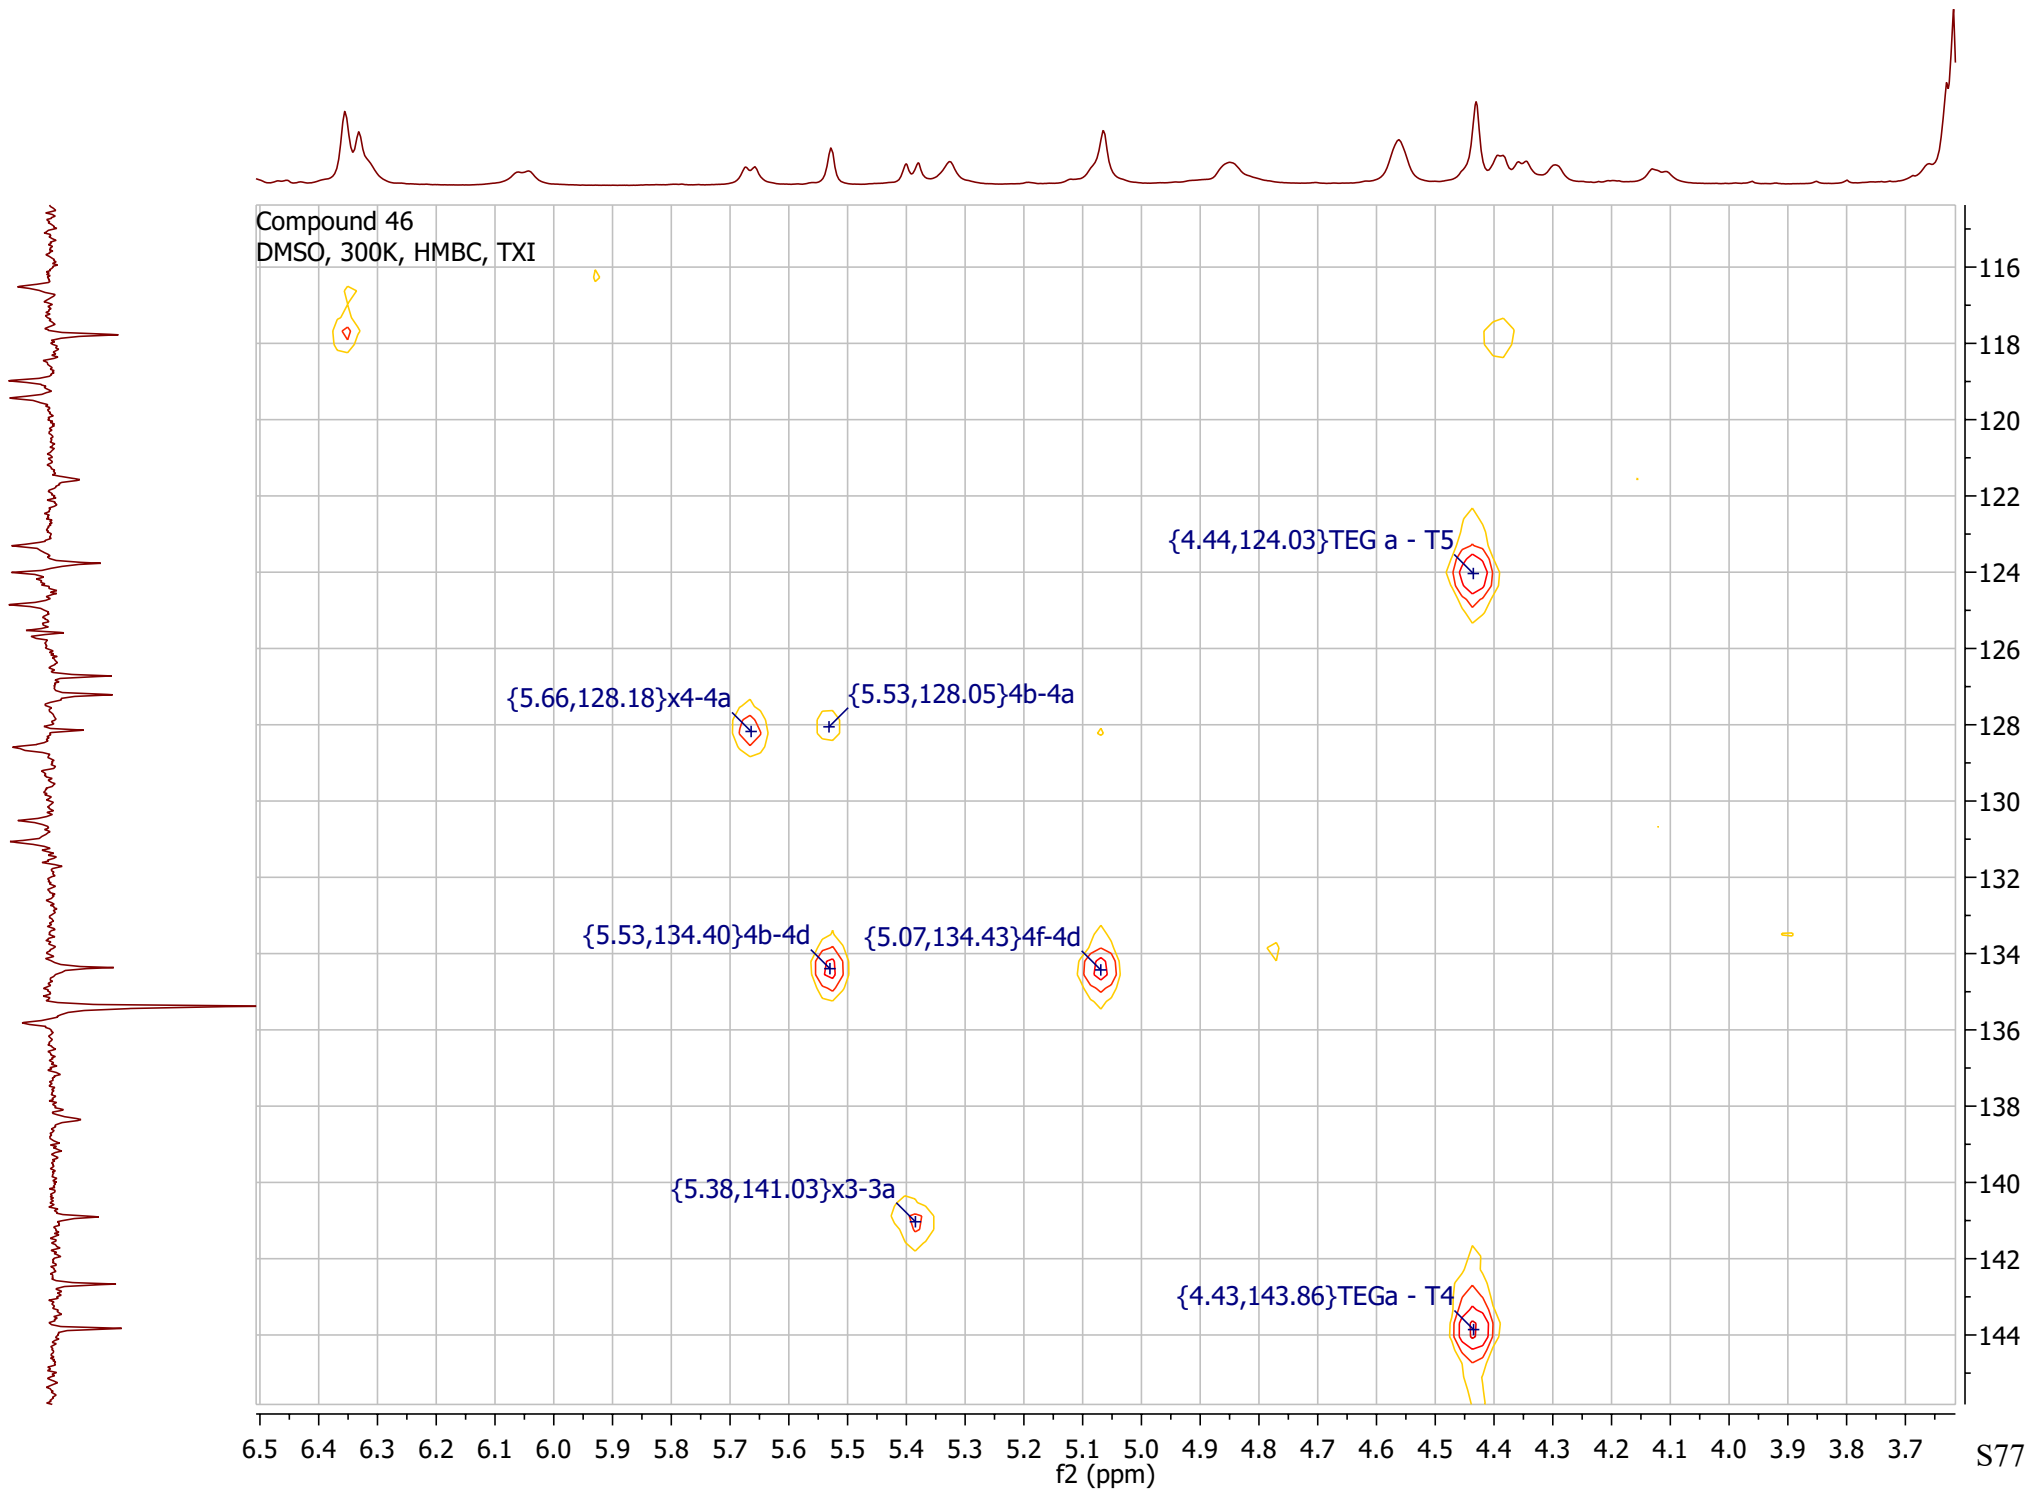

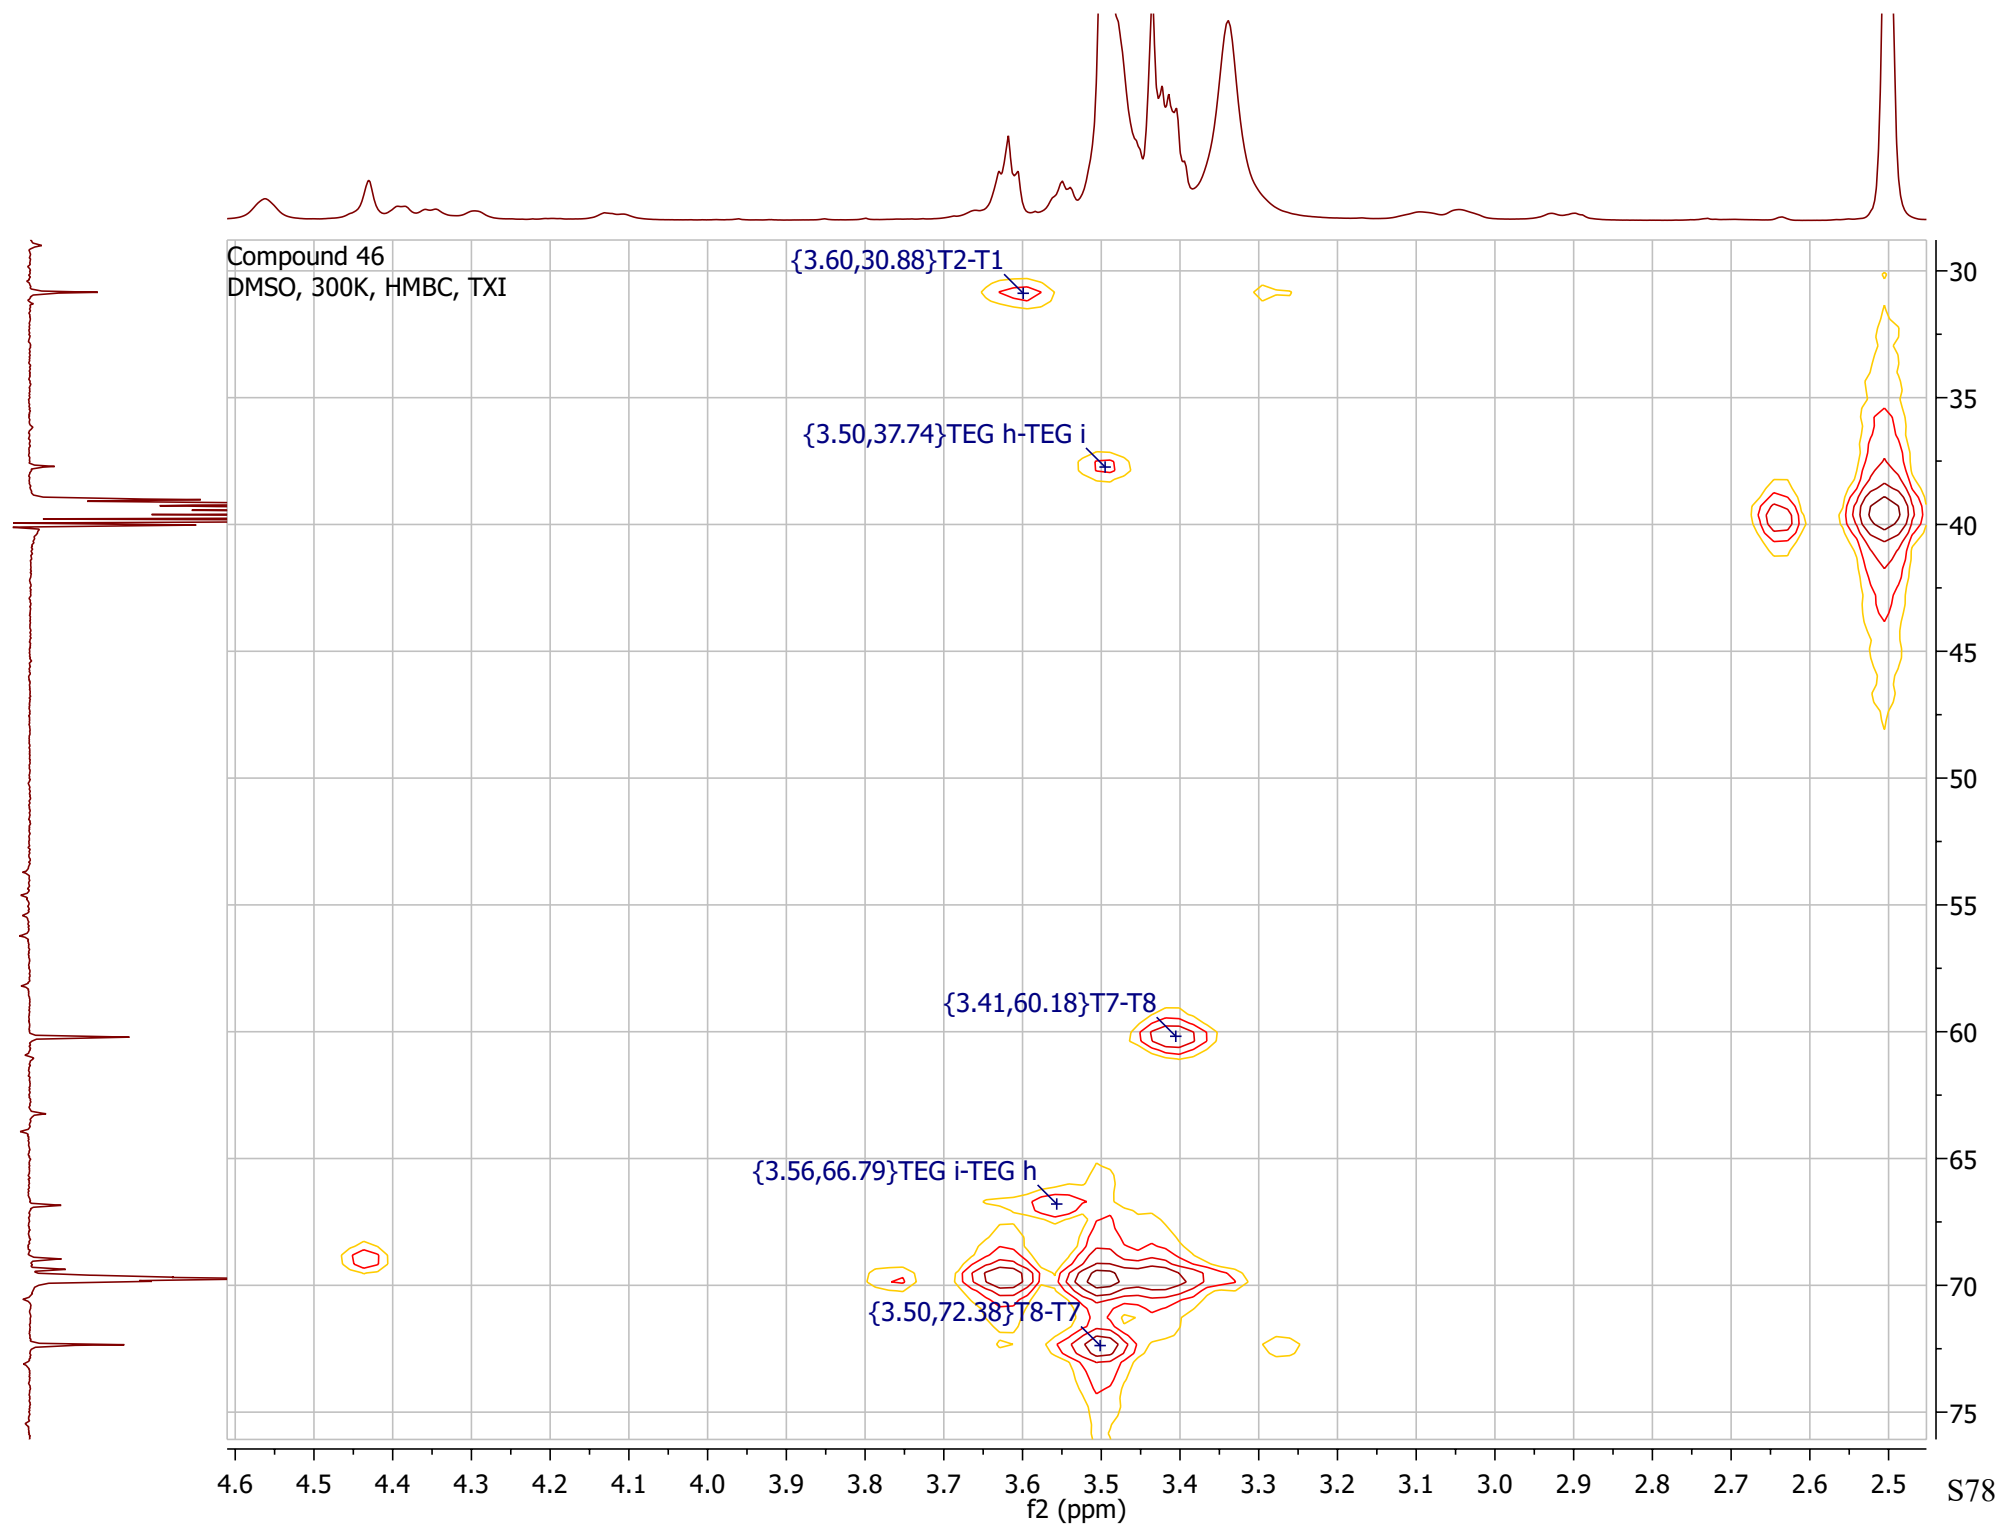

Compound 52  
1H

<sup>1</sup>H NMR (360 MHz, Chloroform-*d*) δ 7.78 (s, 1H), 4.62 (s, 2H), 4.58 – 4.51 (m, 2H), 3.88 (t, *J* = 5.1 Hz, 2H), 3.76 – 3.70 (m, 2H), 3.67 (dd, *J* = 6.0, 2.7 Hz, 2H), 3.61 (q, *J* = 4.5 Hz, 8H), 3.53 (t, *J* = 6.6 Hz, 2H), 2.94 (s, 1H), 1.58 (dt, *J* = 14.5, 6.7 Hz, 2H), 1.37 (dq, *J* = 14.5, 7.3 Hz, 2H), 0.91 (t, *J* = 7.3 Hz, 3H).

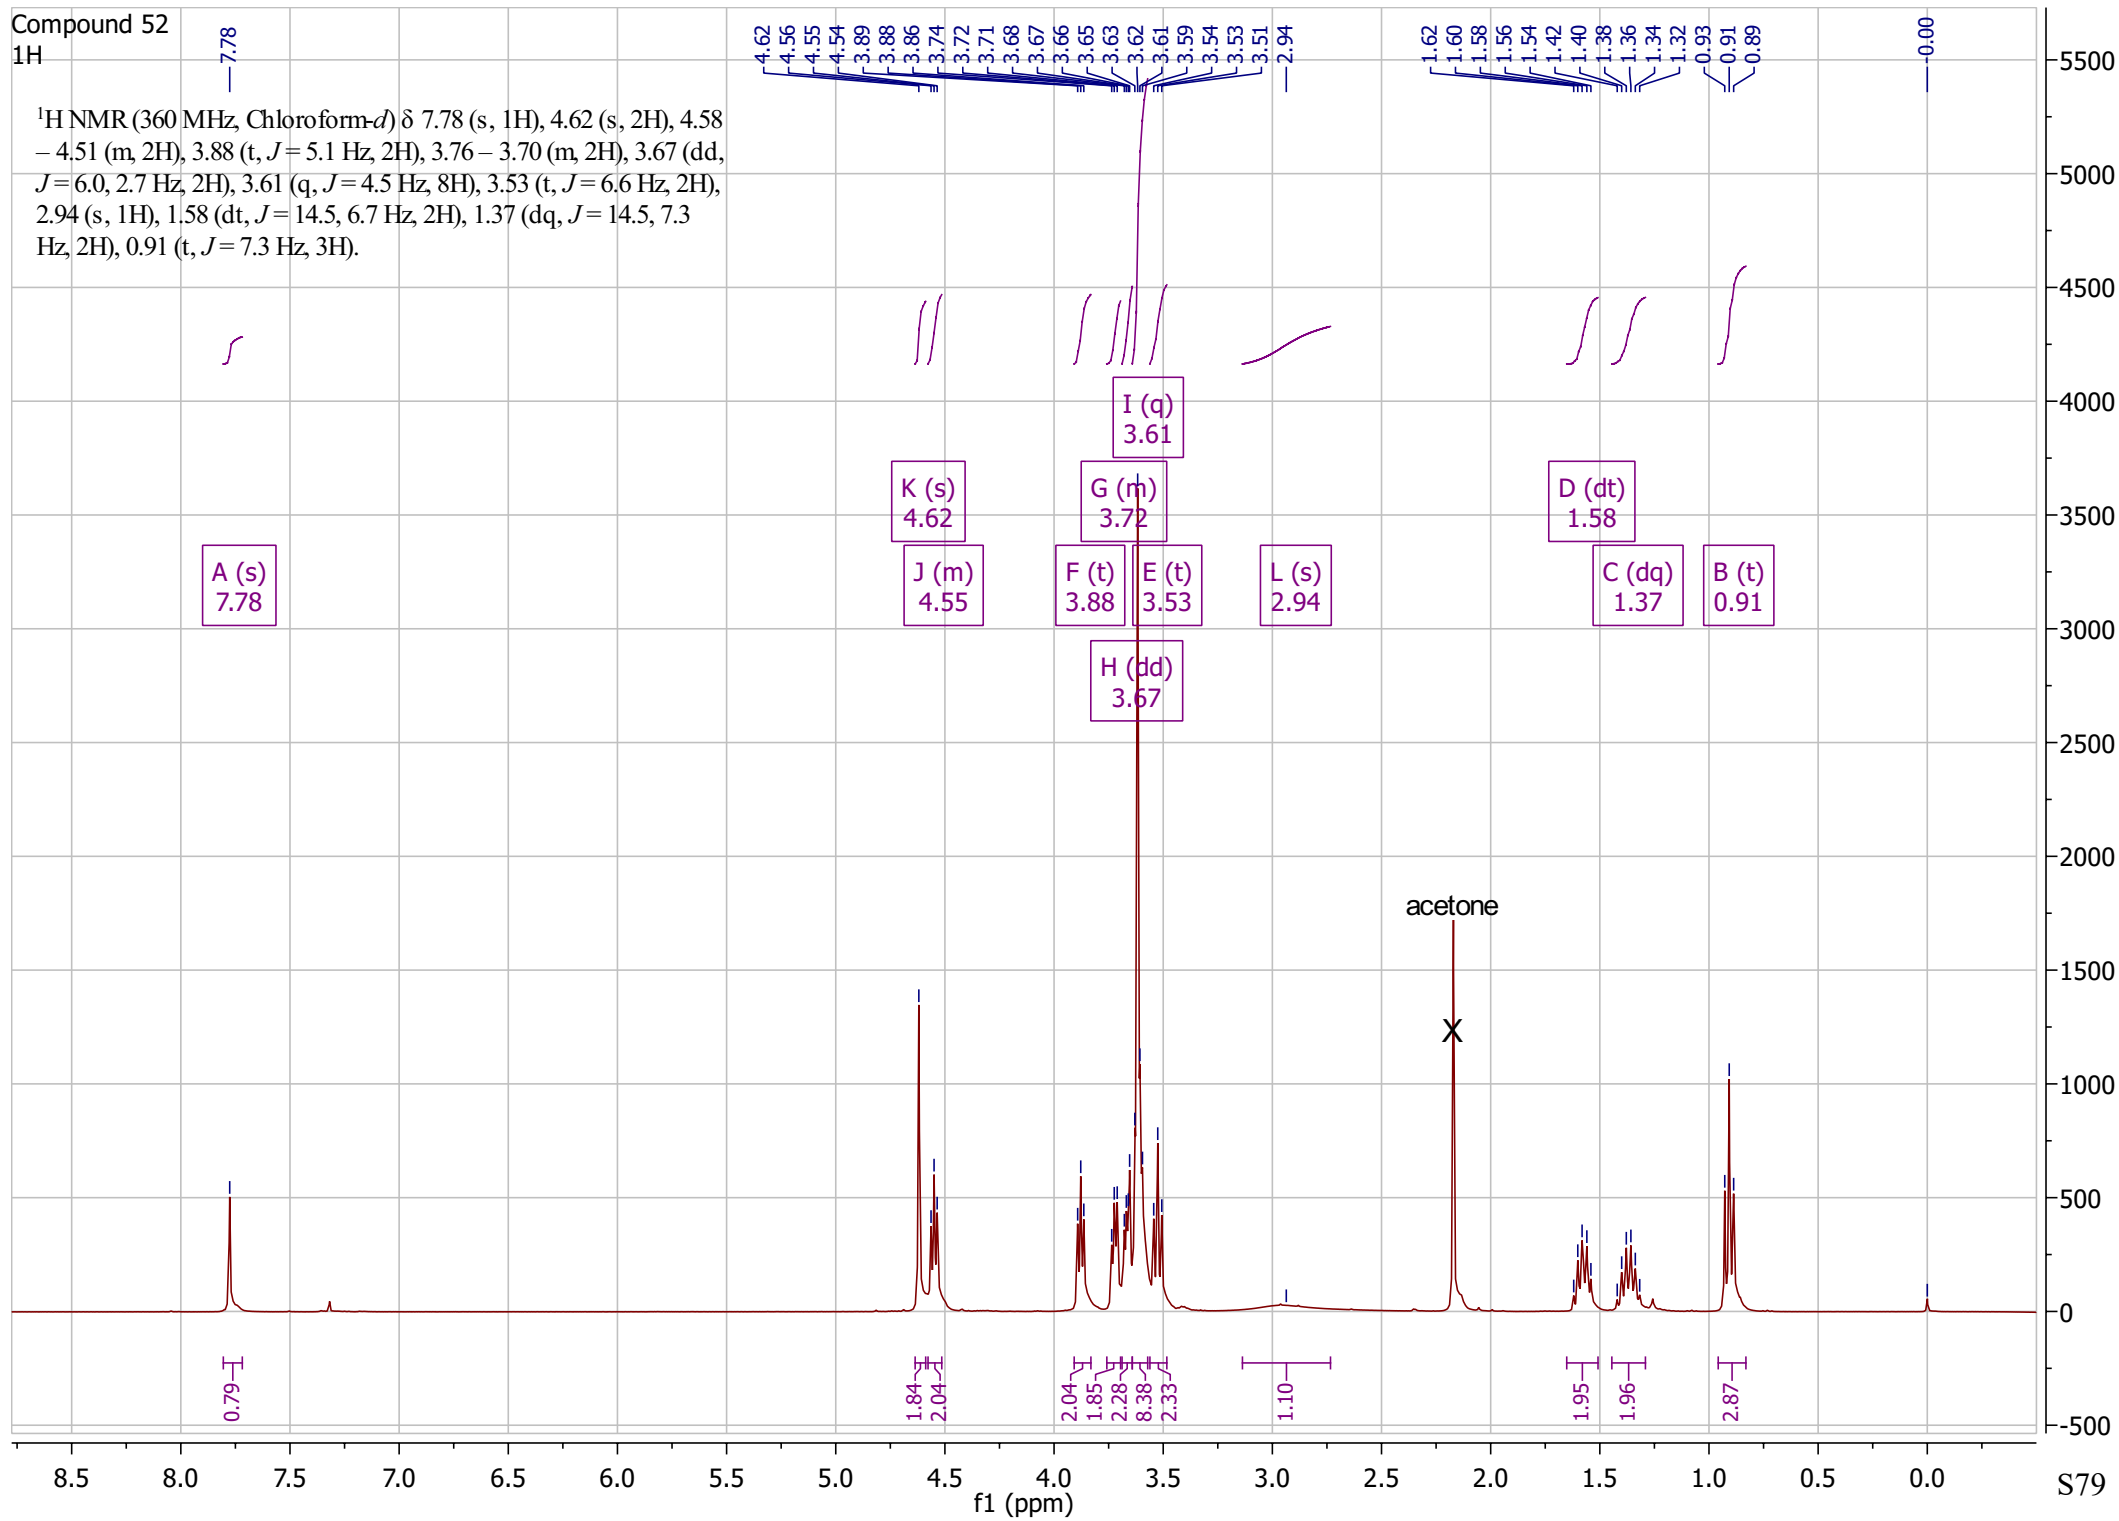

Compound 52

<sup>1</sup>H

<sup>13</sup>C NMR (91 MHz, CDCl<sub>3</sub>) δ 145.32, 123.69, 72.57,  
70.59, 70.54, 70.47, 70.44, 70.32, 69.54, 64.29, 61.64,  
50.23, 31.72, 19.29, 13.89.

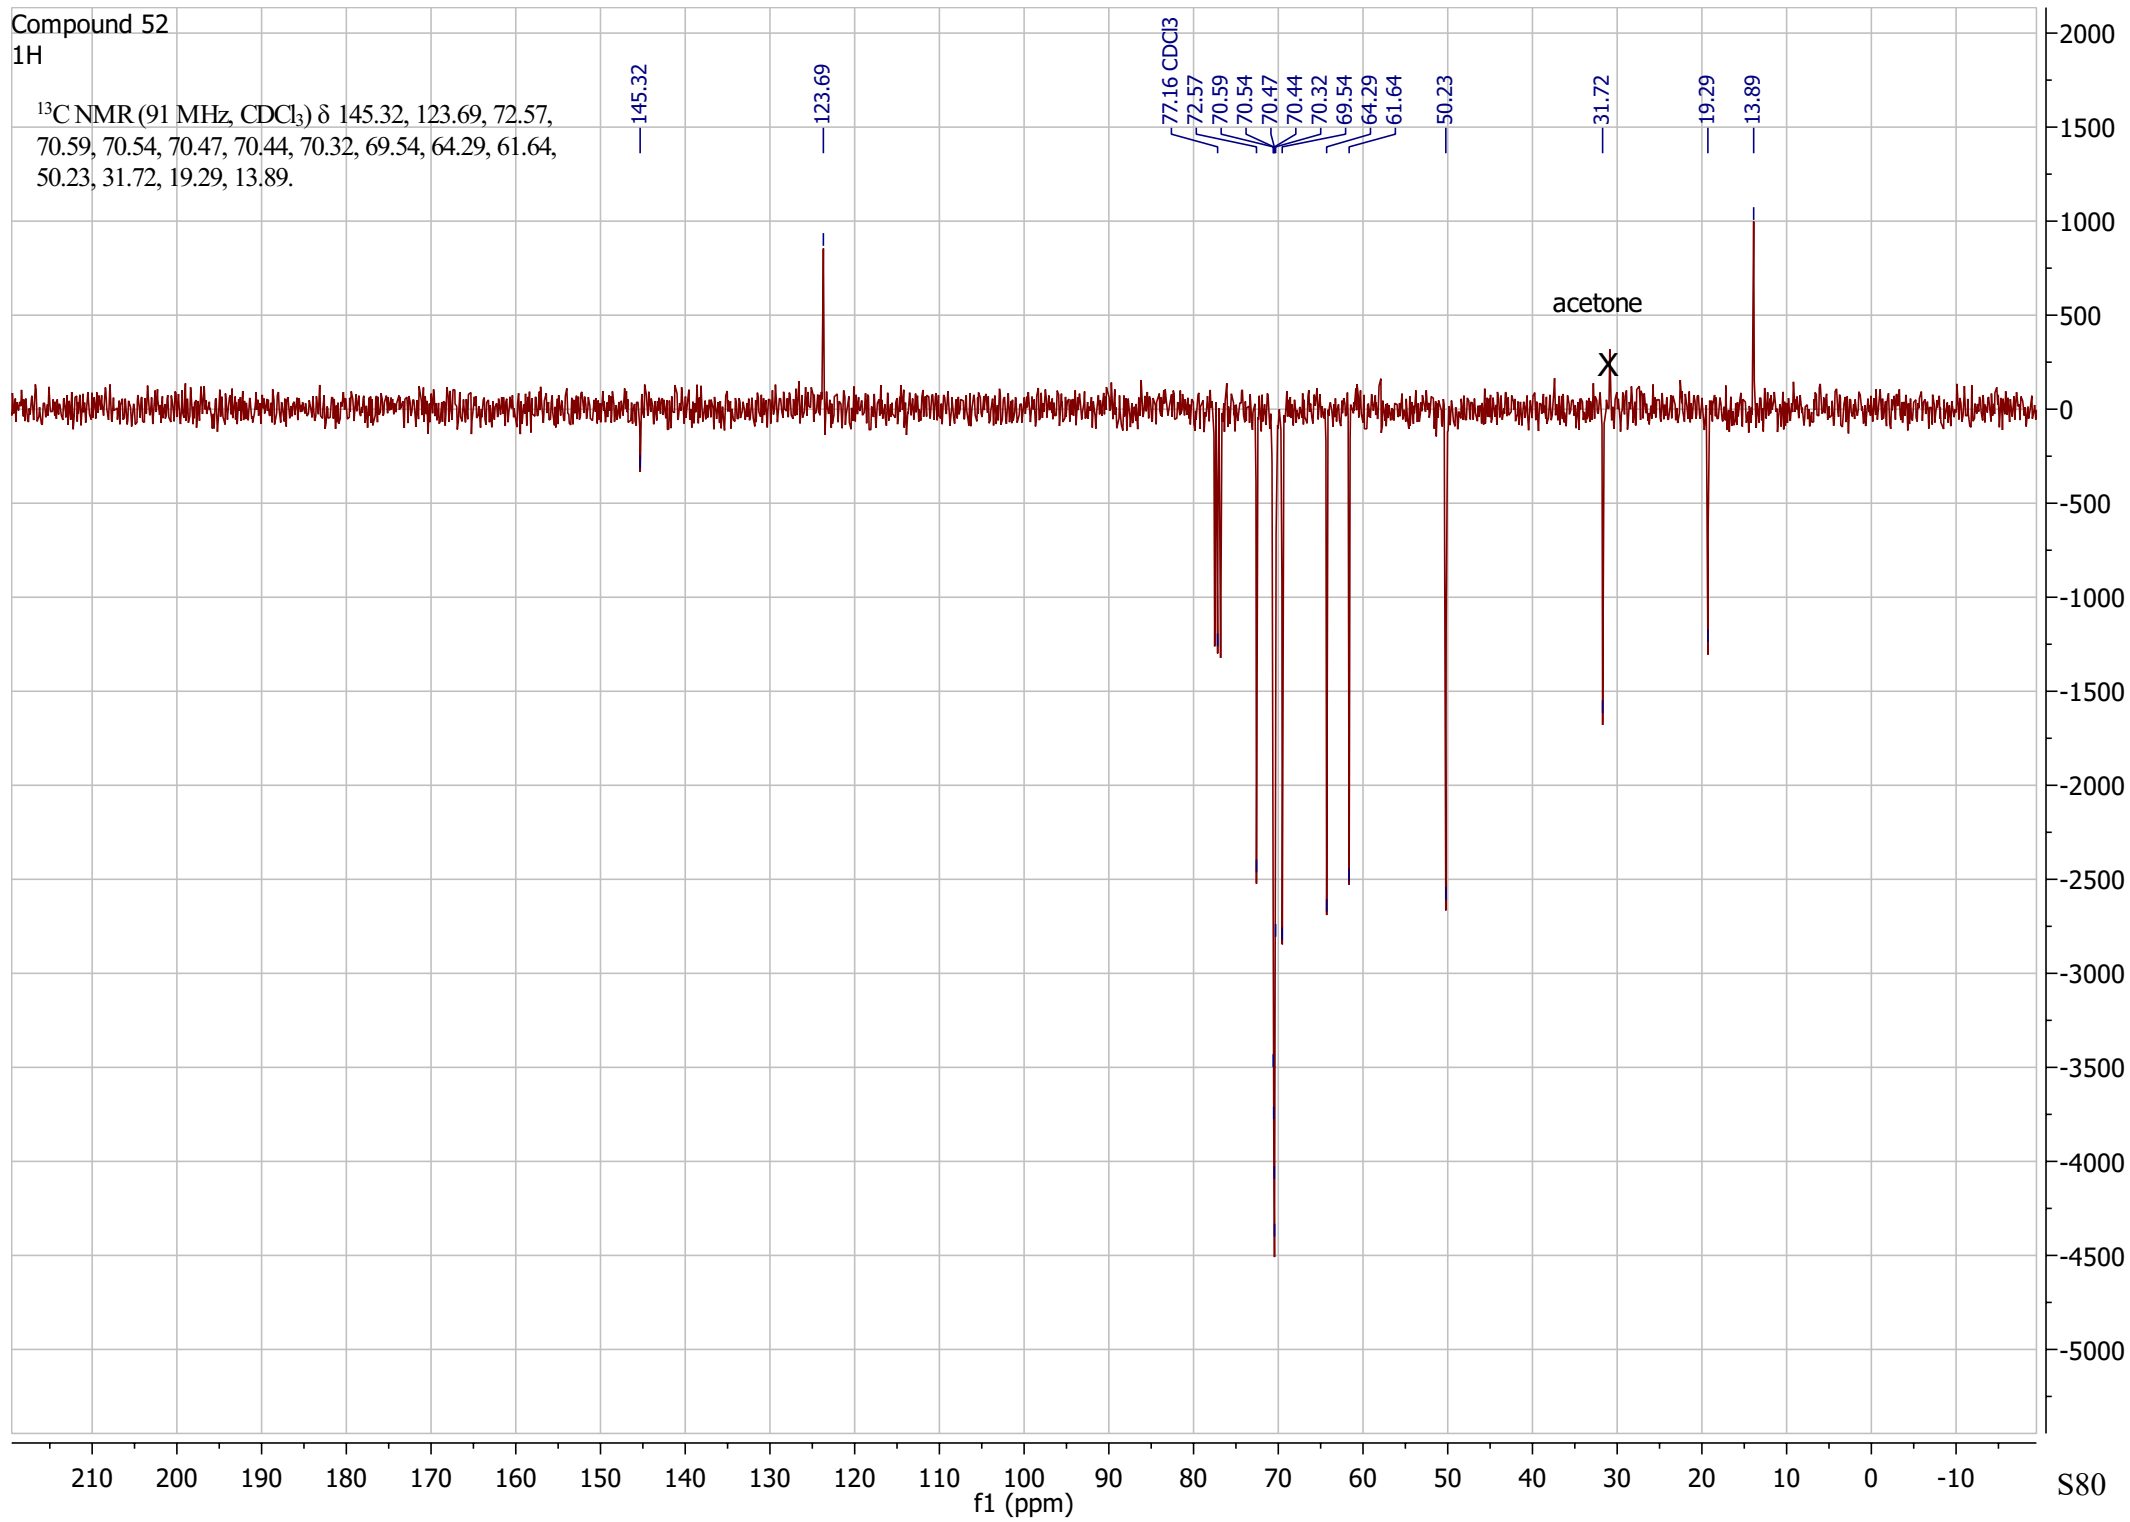

Compound 53  
1H

$^1\text{H}$  NMR (360 MHz, Chloroform-*d*)  $\delta$  7.79 (s, 1H), 4.62 (s, 2H), 4.55 (t,  $J = 5.0$  Hz, 2H), 3.92 – 3.84 (m, 2H), 3.76 – 3.69 (m, 2H), 3.69 – 3.57 (m, 10H), 3.52 (t,  $J = 6.7$  Hz, 2H), 3.09 (s, 1H), 1.66 – 1.53 (m, 2H), 1.41 – 1.24 (m, 6H), 0.88 (t,  $J = 6.6$  Hz, 3H).

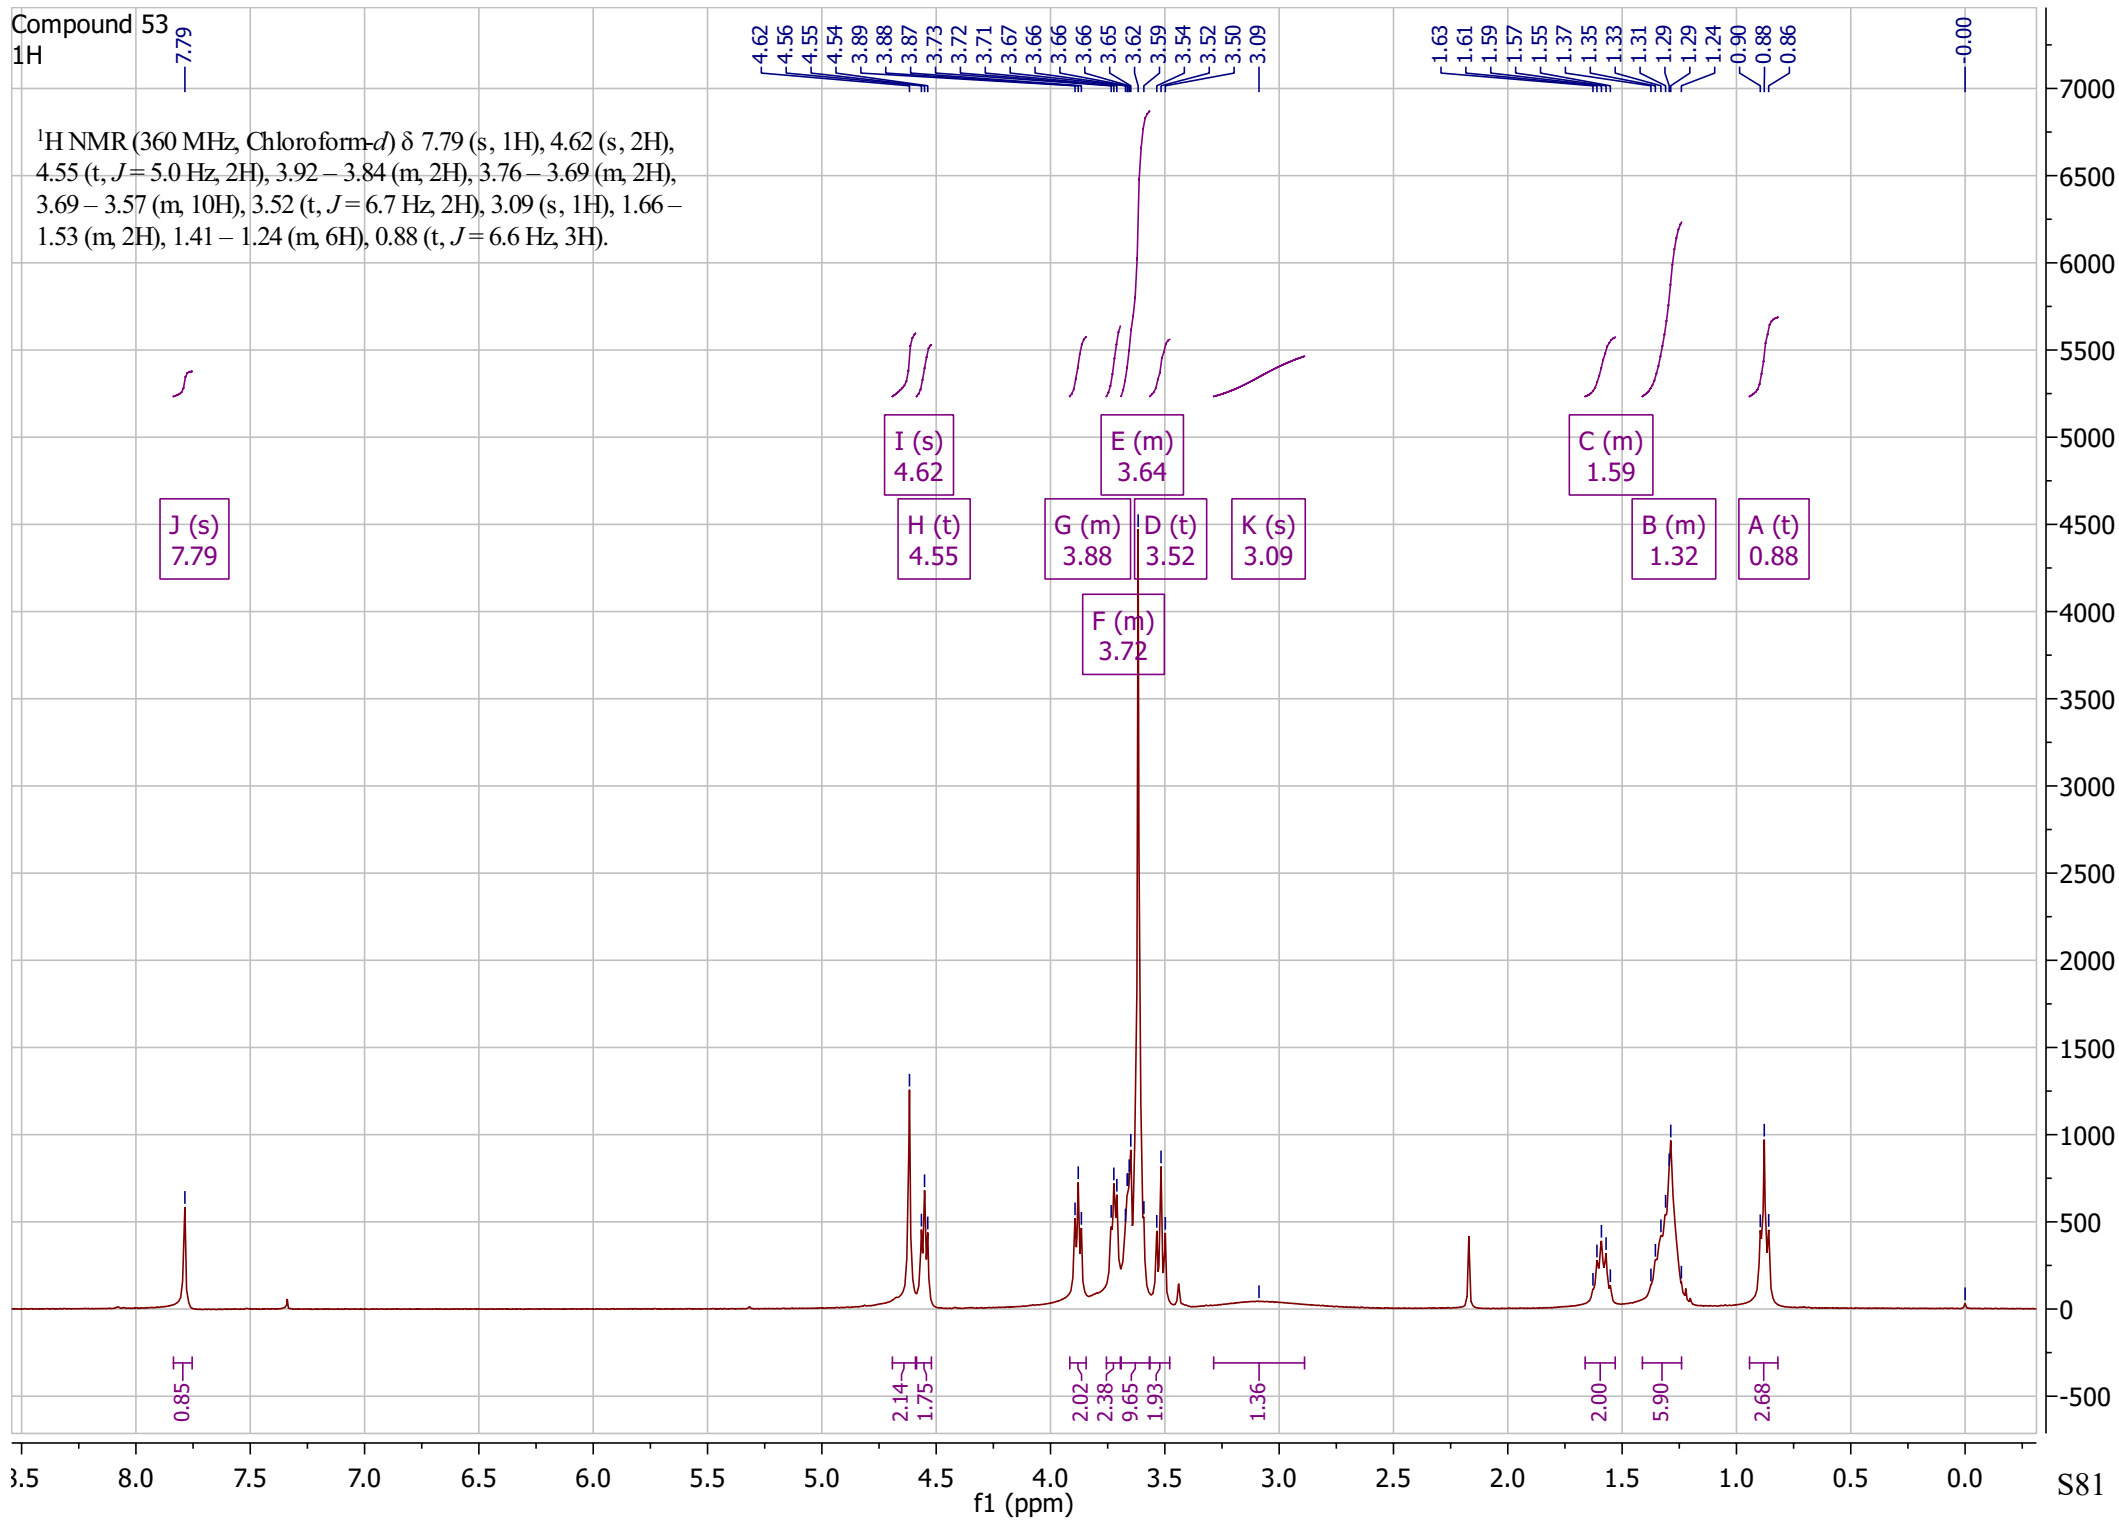

Compound 53  
13C

$^{13}\text{C}$  NMR (101 MHz,  $\text{CDCl}_3$ )  $\delta$  145.23, 123.79, 72.56,  
70.78, 70.52, 70.45, 70.35, 70.22, 69.47, 64.20, 61.53, 50.18,  
31.63, 29.56, 25.74, 22.56, 14.01.

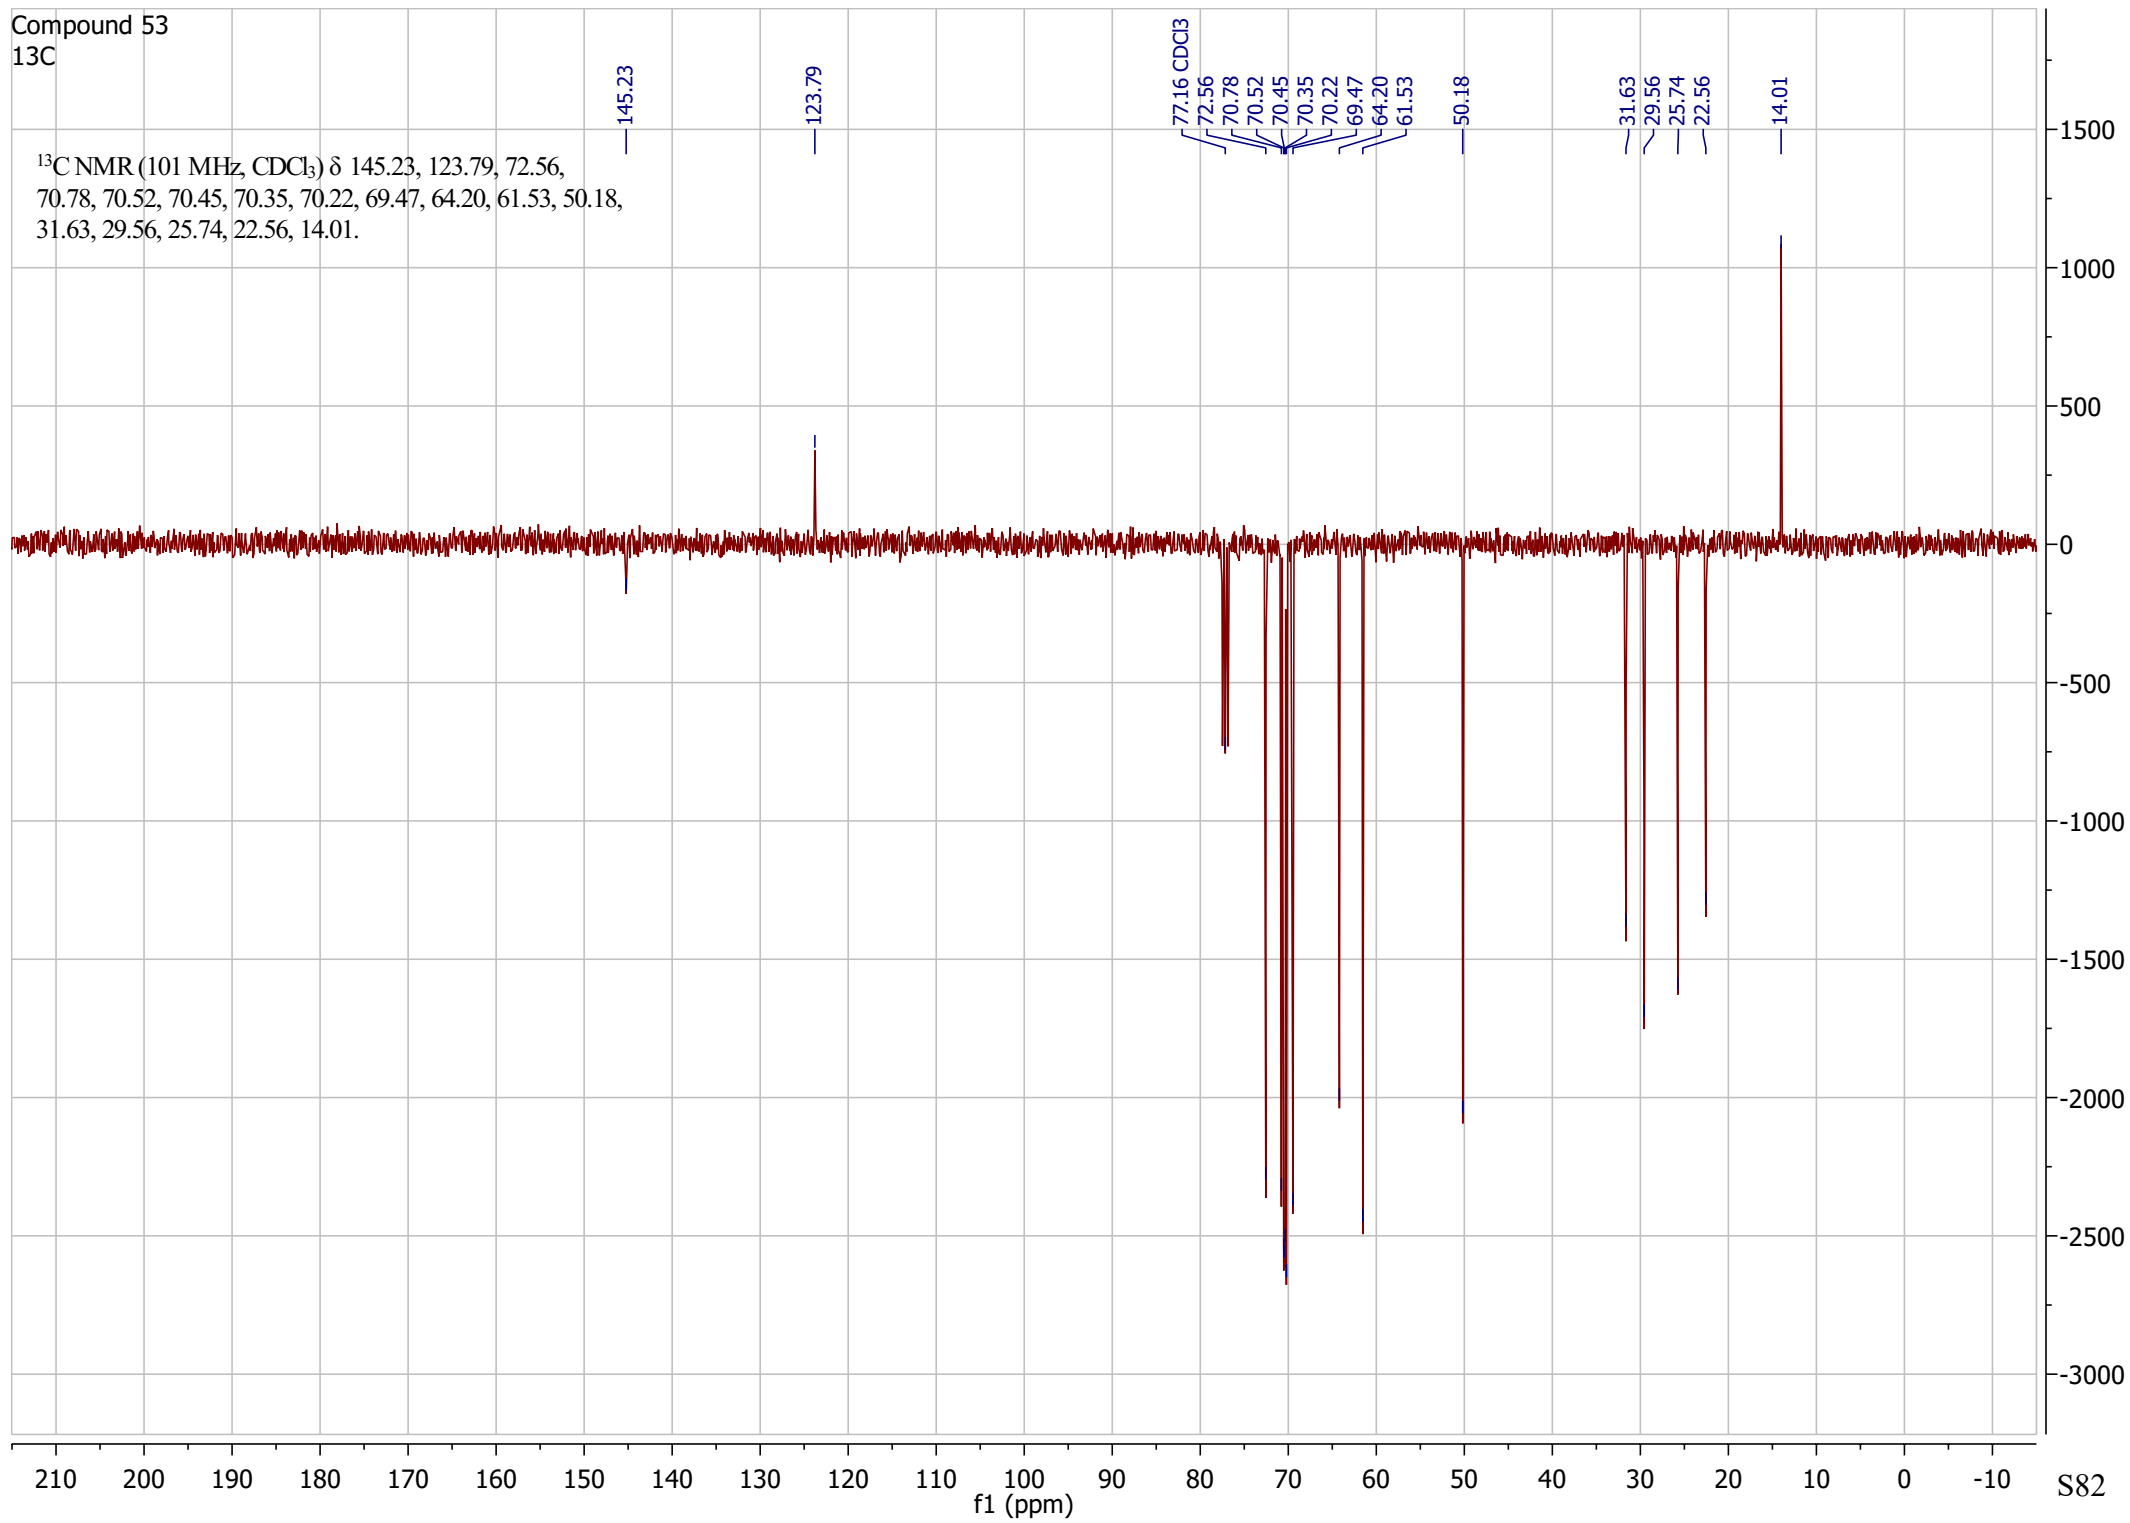

Compound 54  
1H

$^1\text{H}$  NMR (360 MHz, Chloroform-*d*)  $\delta$  7.77 (s, 1H), 4.62 (s, 2H), 4.55 (t,  $J=5.0$  Hz, 2H), 3.95–3.82 (m, 2H), 3.75–3.70 (m, 2H), 3.69–3.56 (m, 10H), 3.51 (t,  $J=6.7$  Hz, 2H), 2.94 (s, 1H), 1.66–1.51 (m, 2H), 1.39–1.18 (m, 10H), 0.87 (t,  $J=6.7$  Hz, 3H).

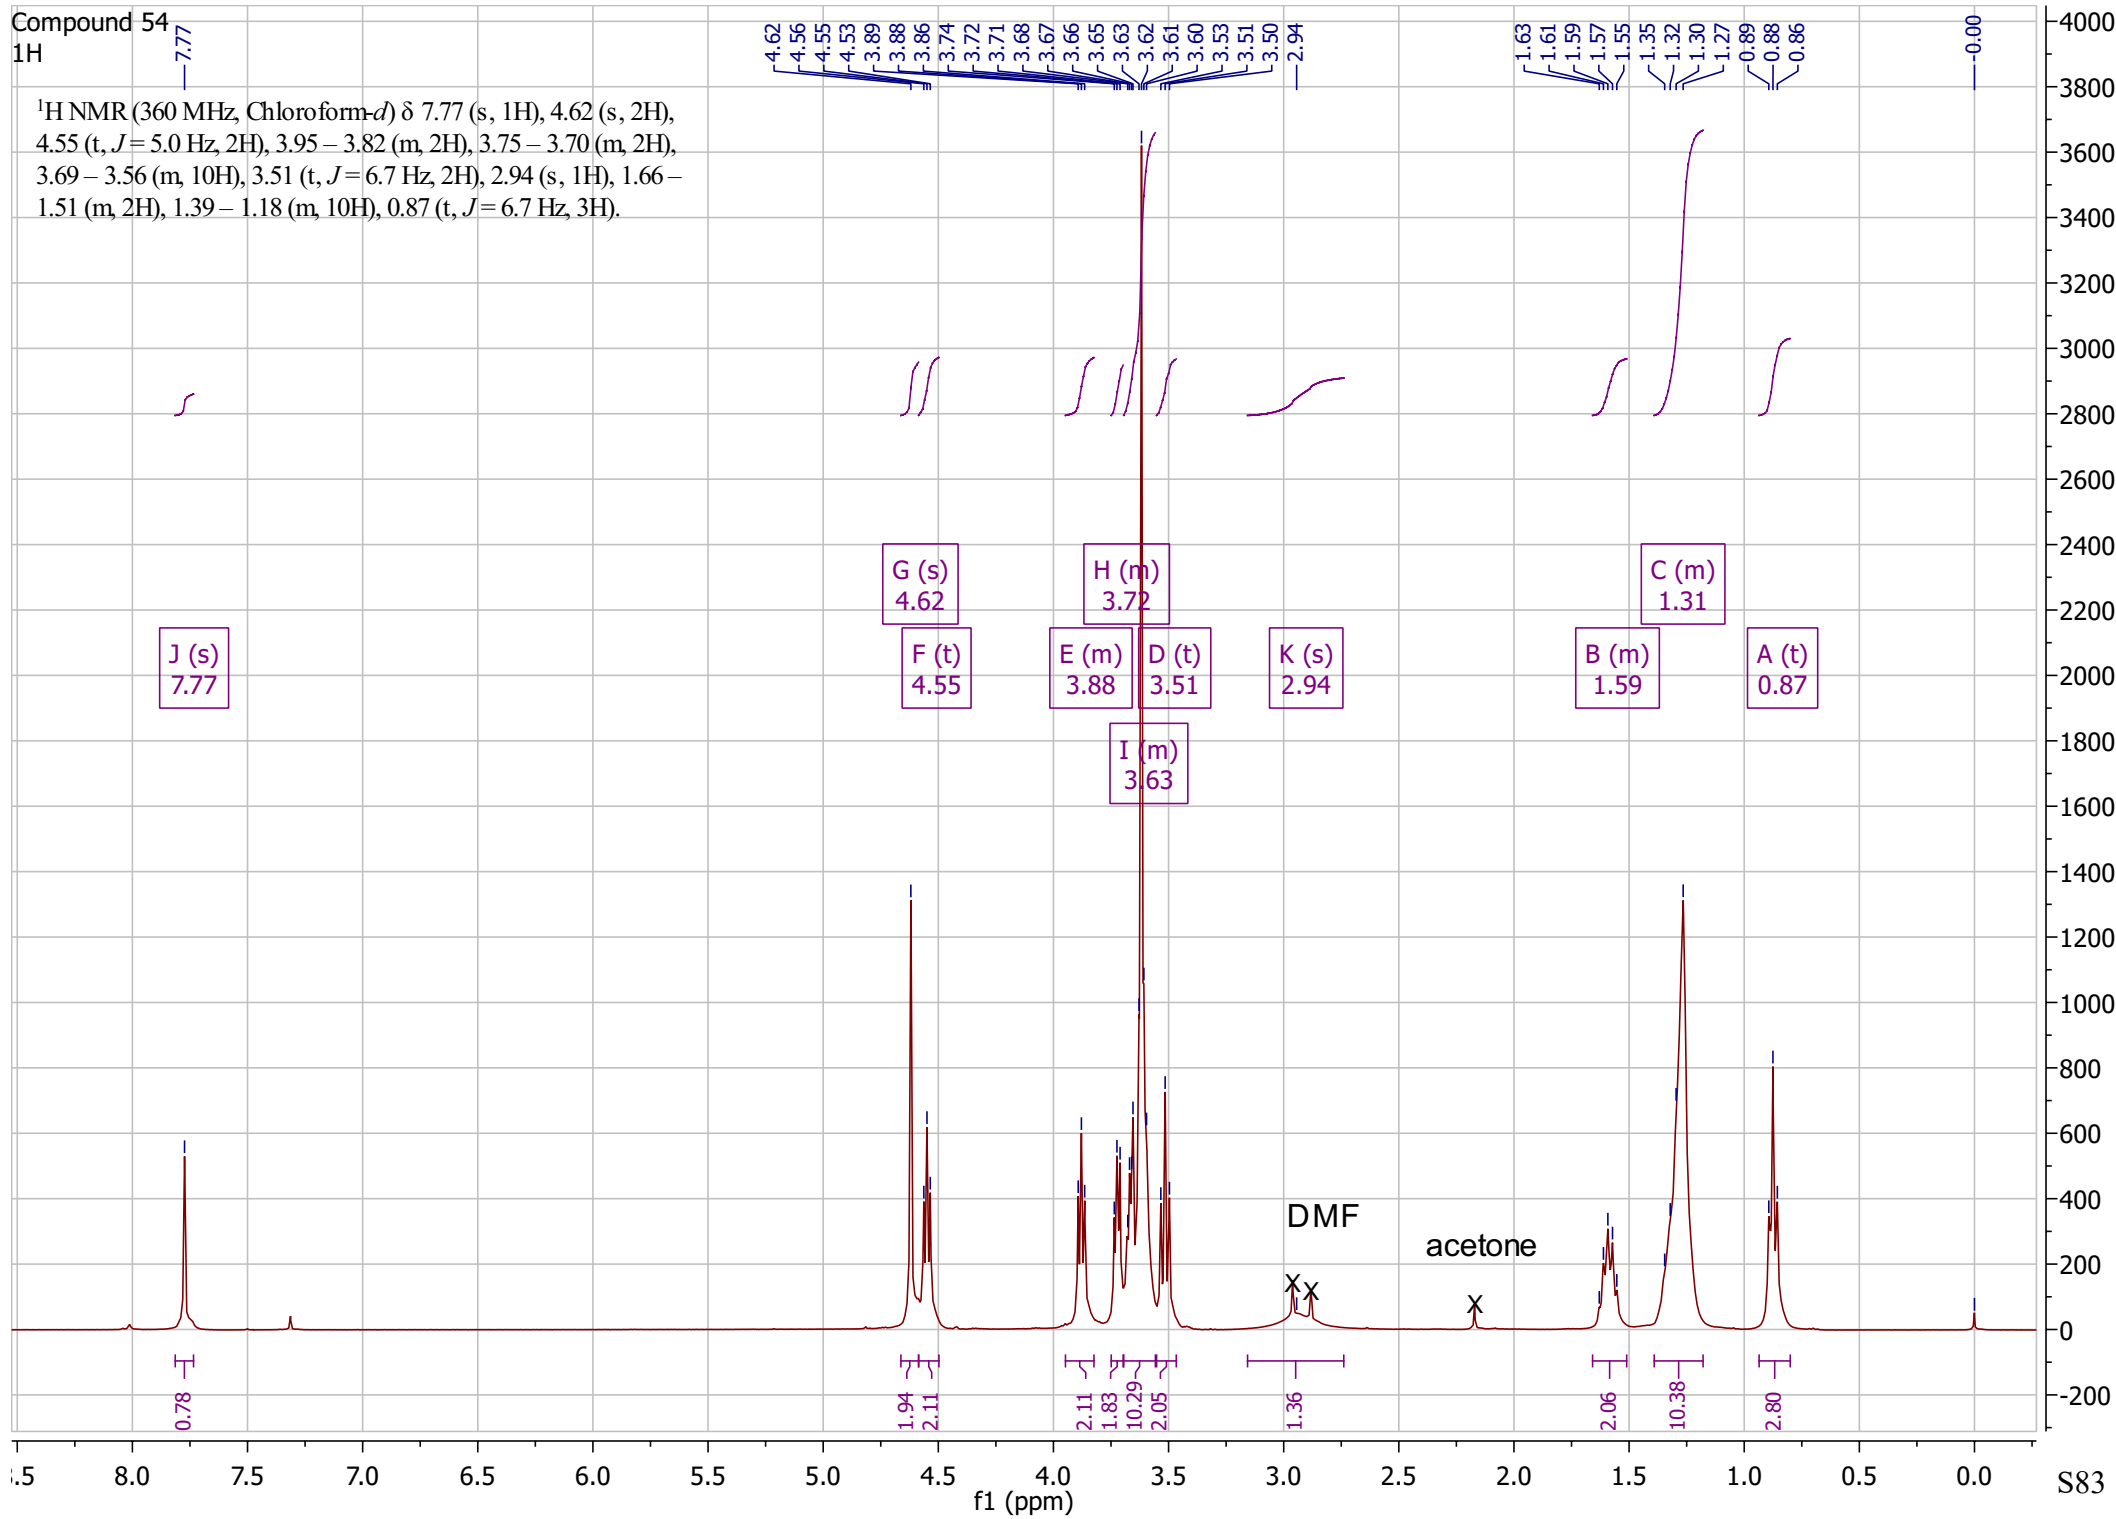

Compound 54

<sup>13</sup>C

<sup>13</sup>C NMR (91 MHz, CDCl<sub>3</sub>) δ 145.32, 123.70, 72.58,  
70.84, 70.61, 70.55, 70.46, 70.34, 69.55, 64.31, 61.65,  
50.23, 31.83, 29.68, 29.45, 29.26, 26.14, 22.66, 14.09.

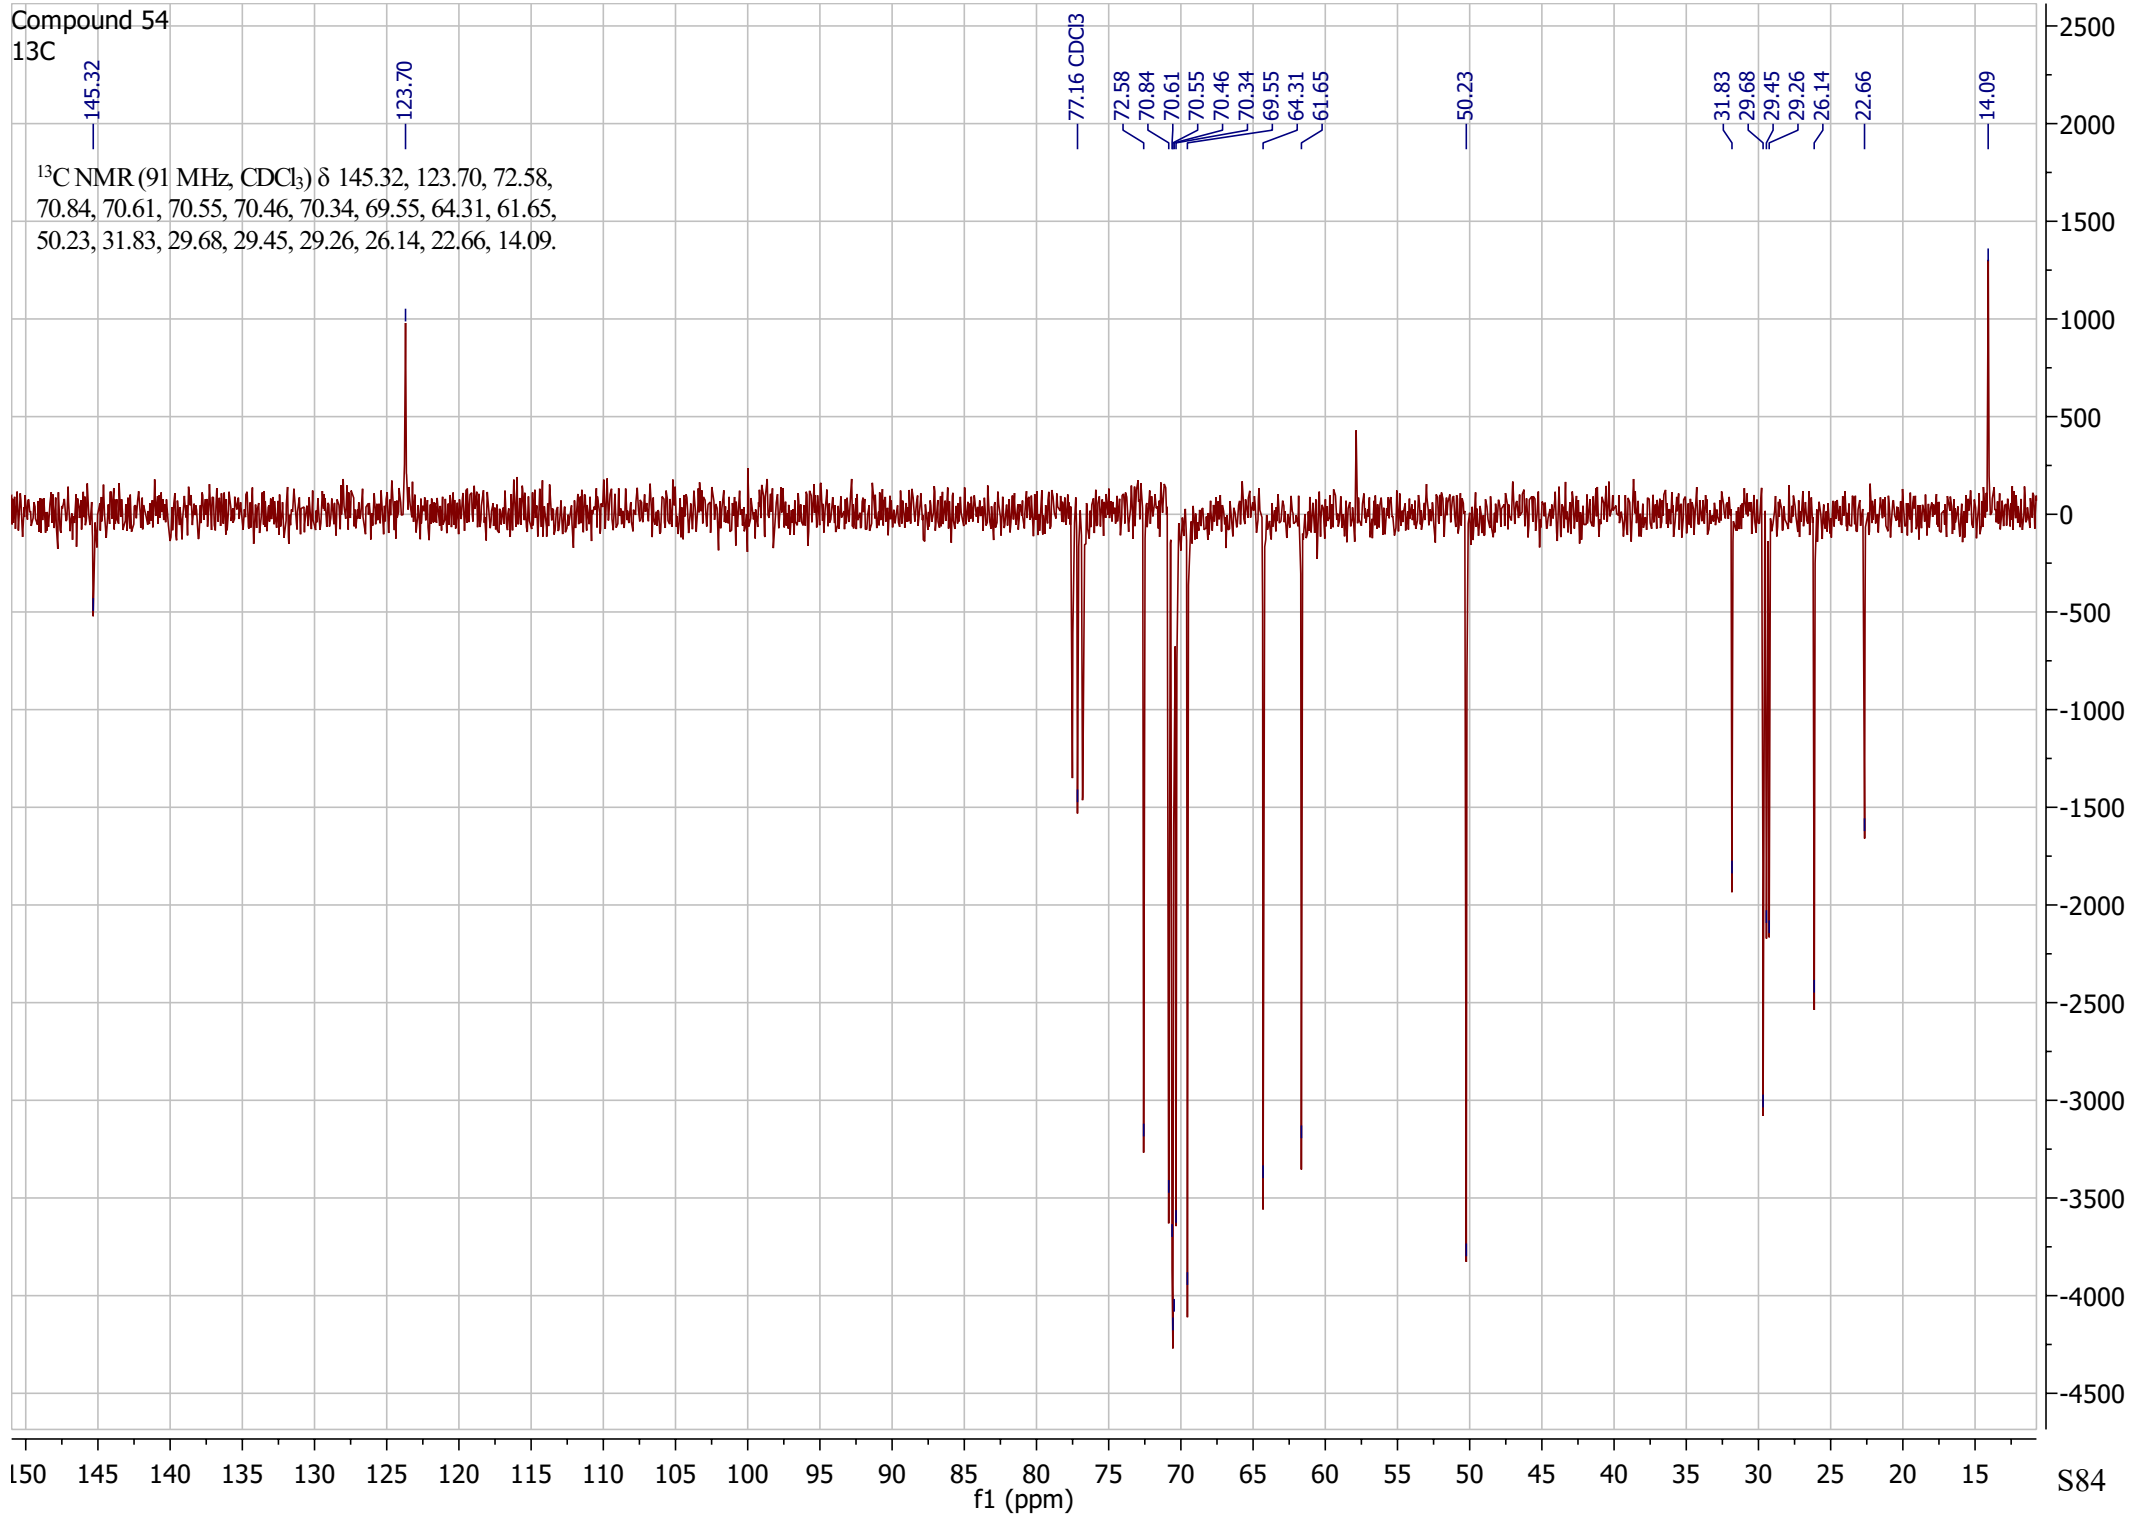

S84



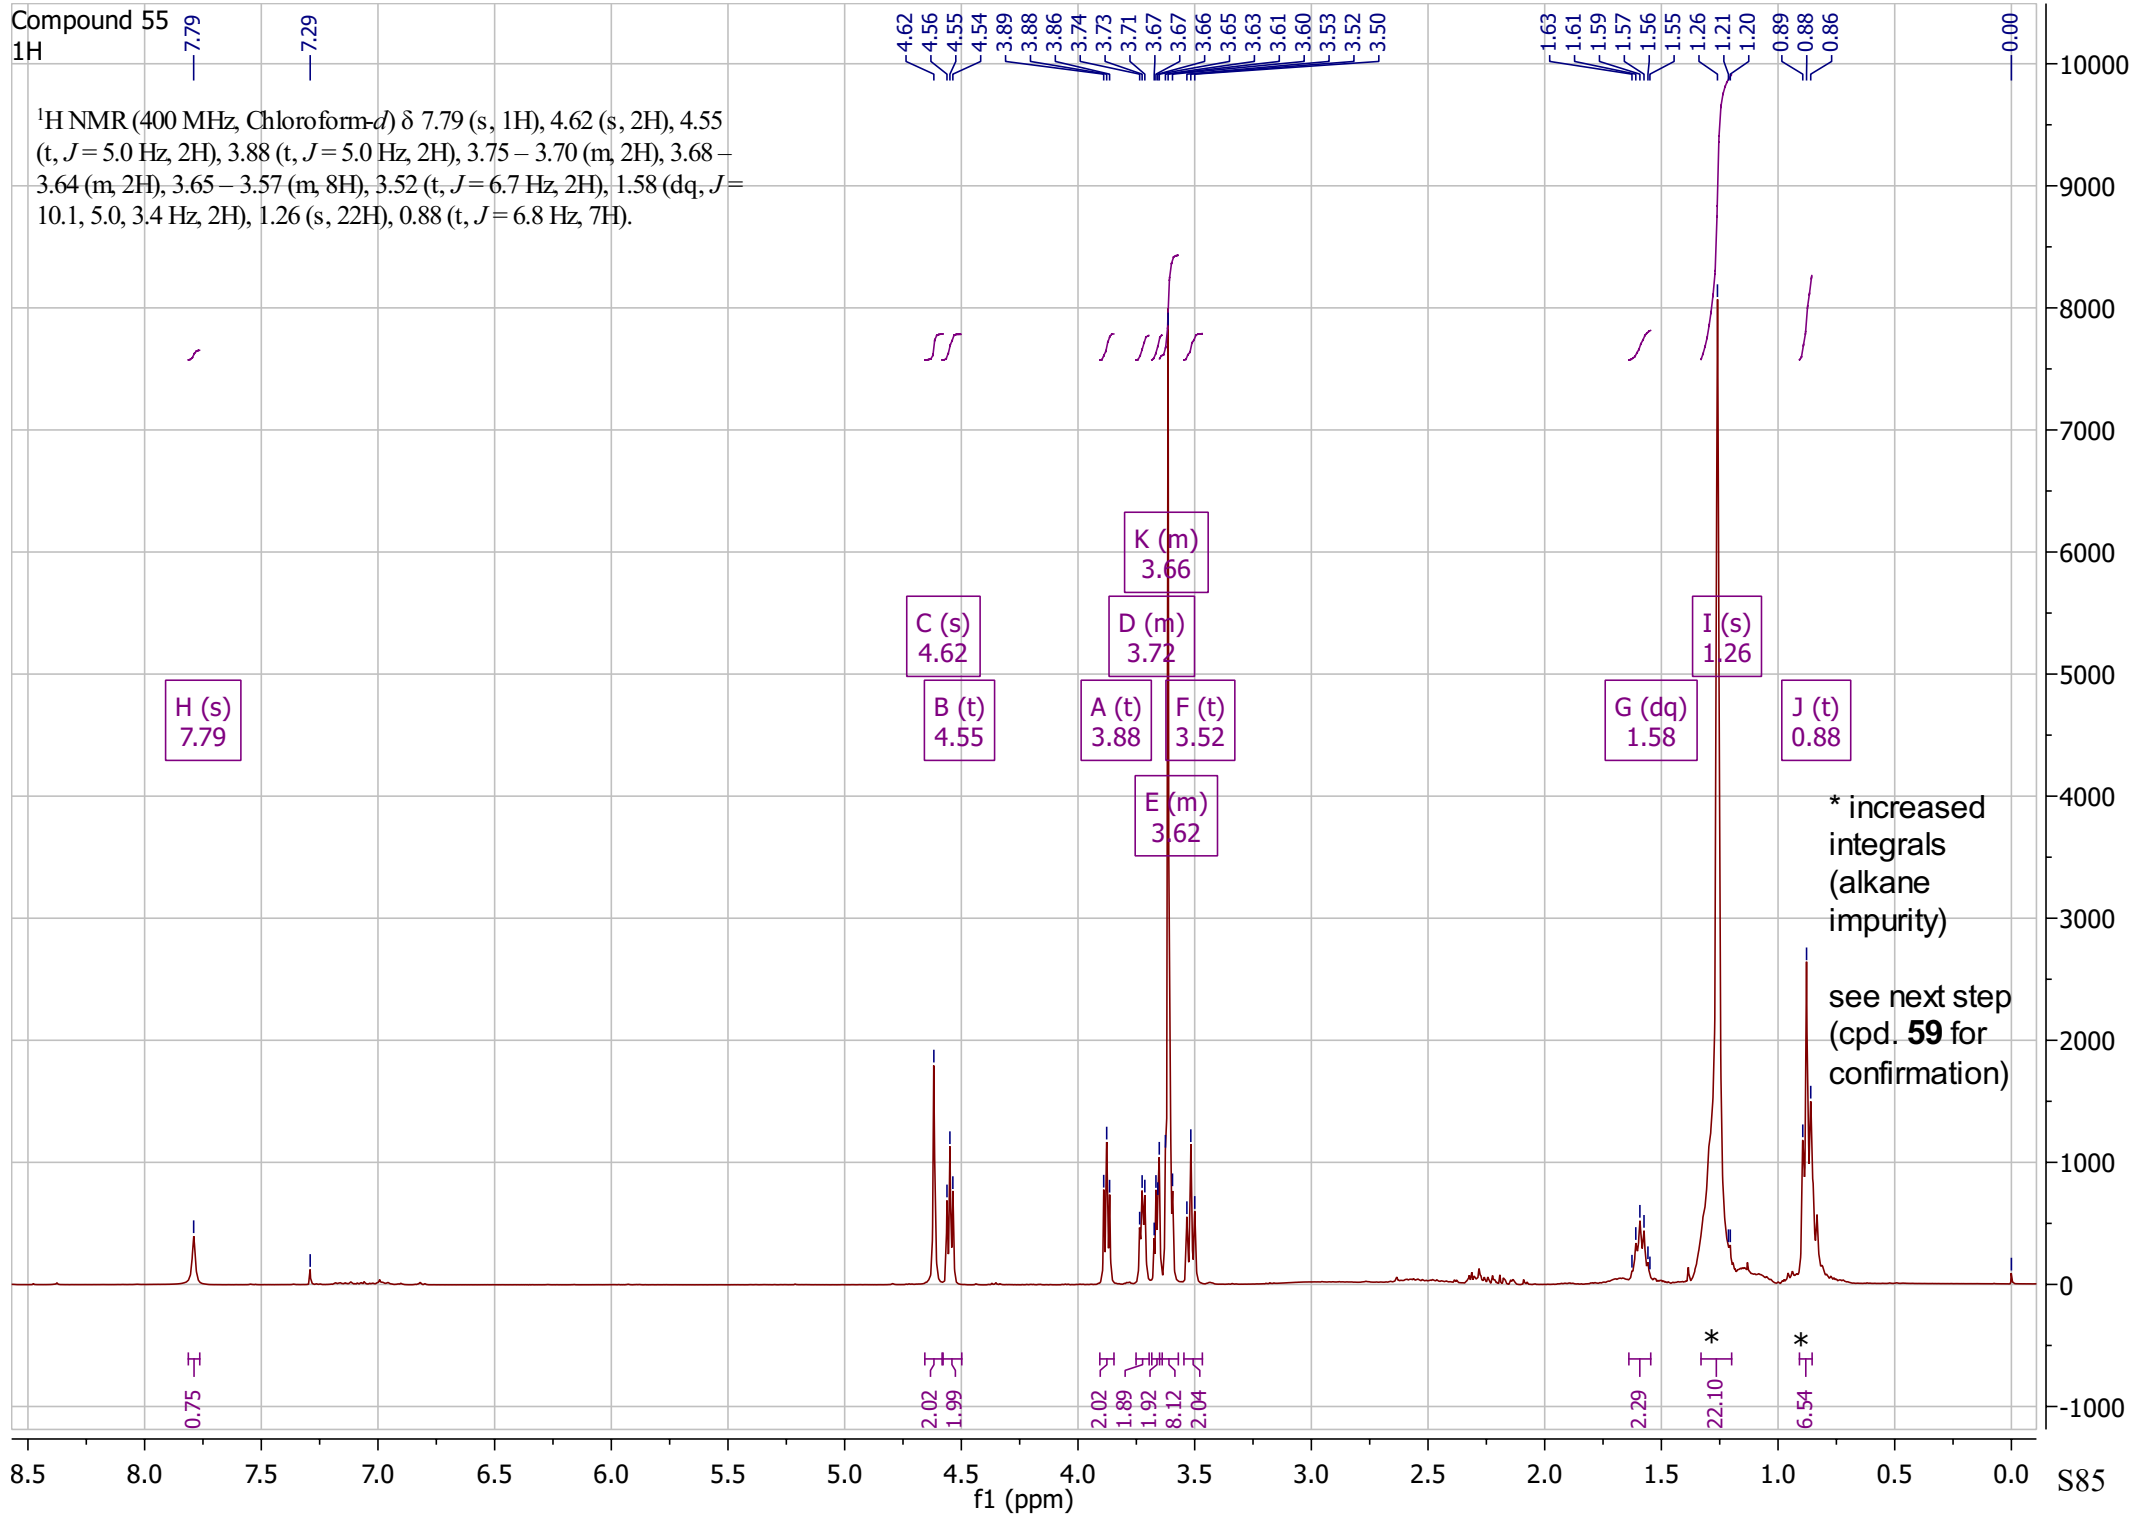

Compound 55  
13C

$^{13}\text{C}$  NMR (101 MHz,  $\text{CDCl}_3$ )  $\delta$  72.63, 70.90, 70.60, 70.54, 70.44, 70.30, 69.57, 64.32, 61.65, 50.27, 31.99, 29.76, 29.71, 29.66, 29.64, 29.55, 29.42, 29.38, 26.17, 22.74, 14.17.

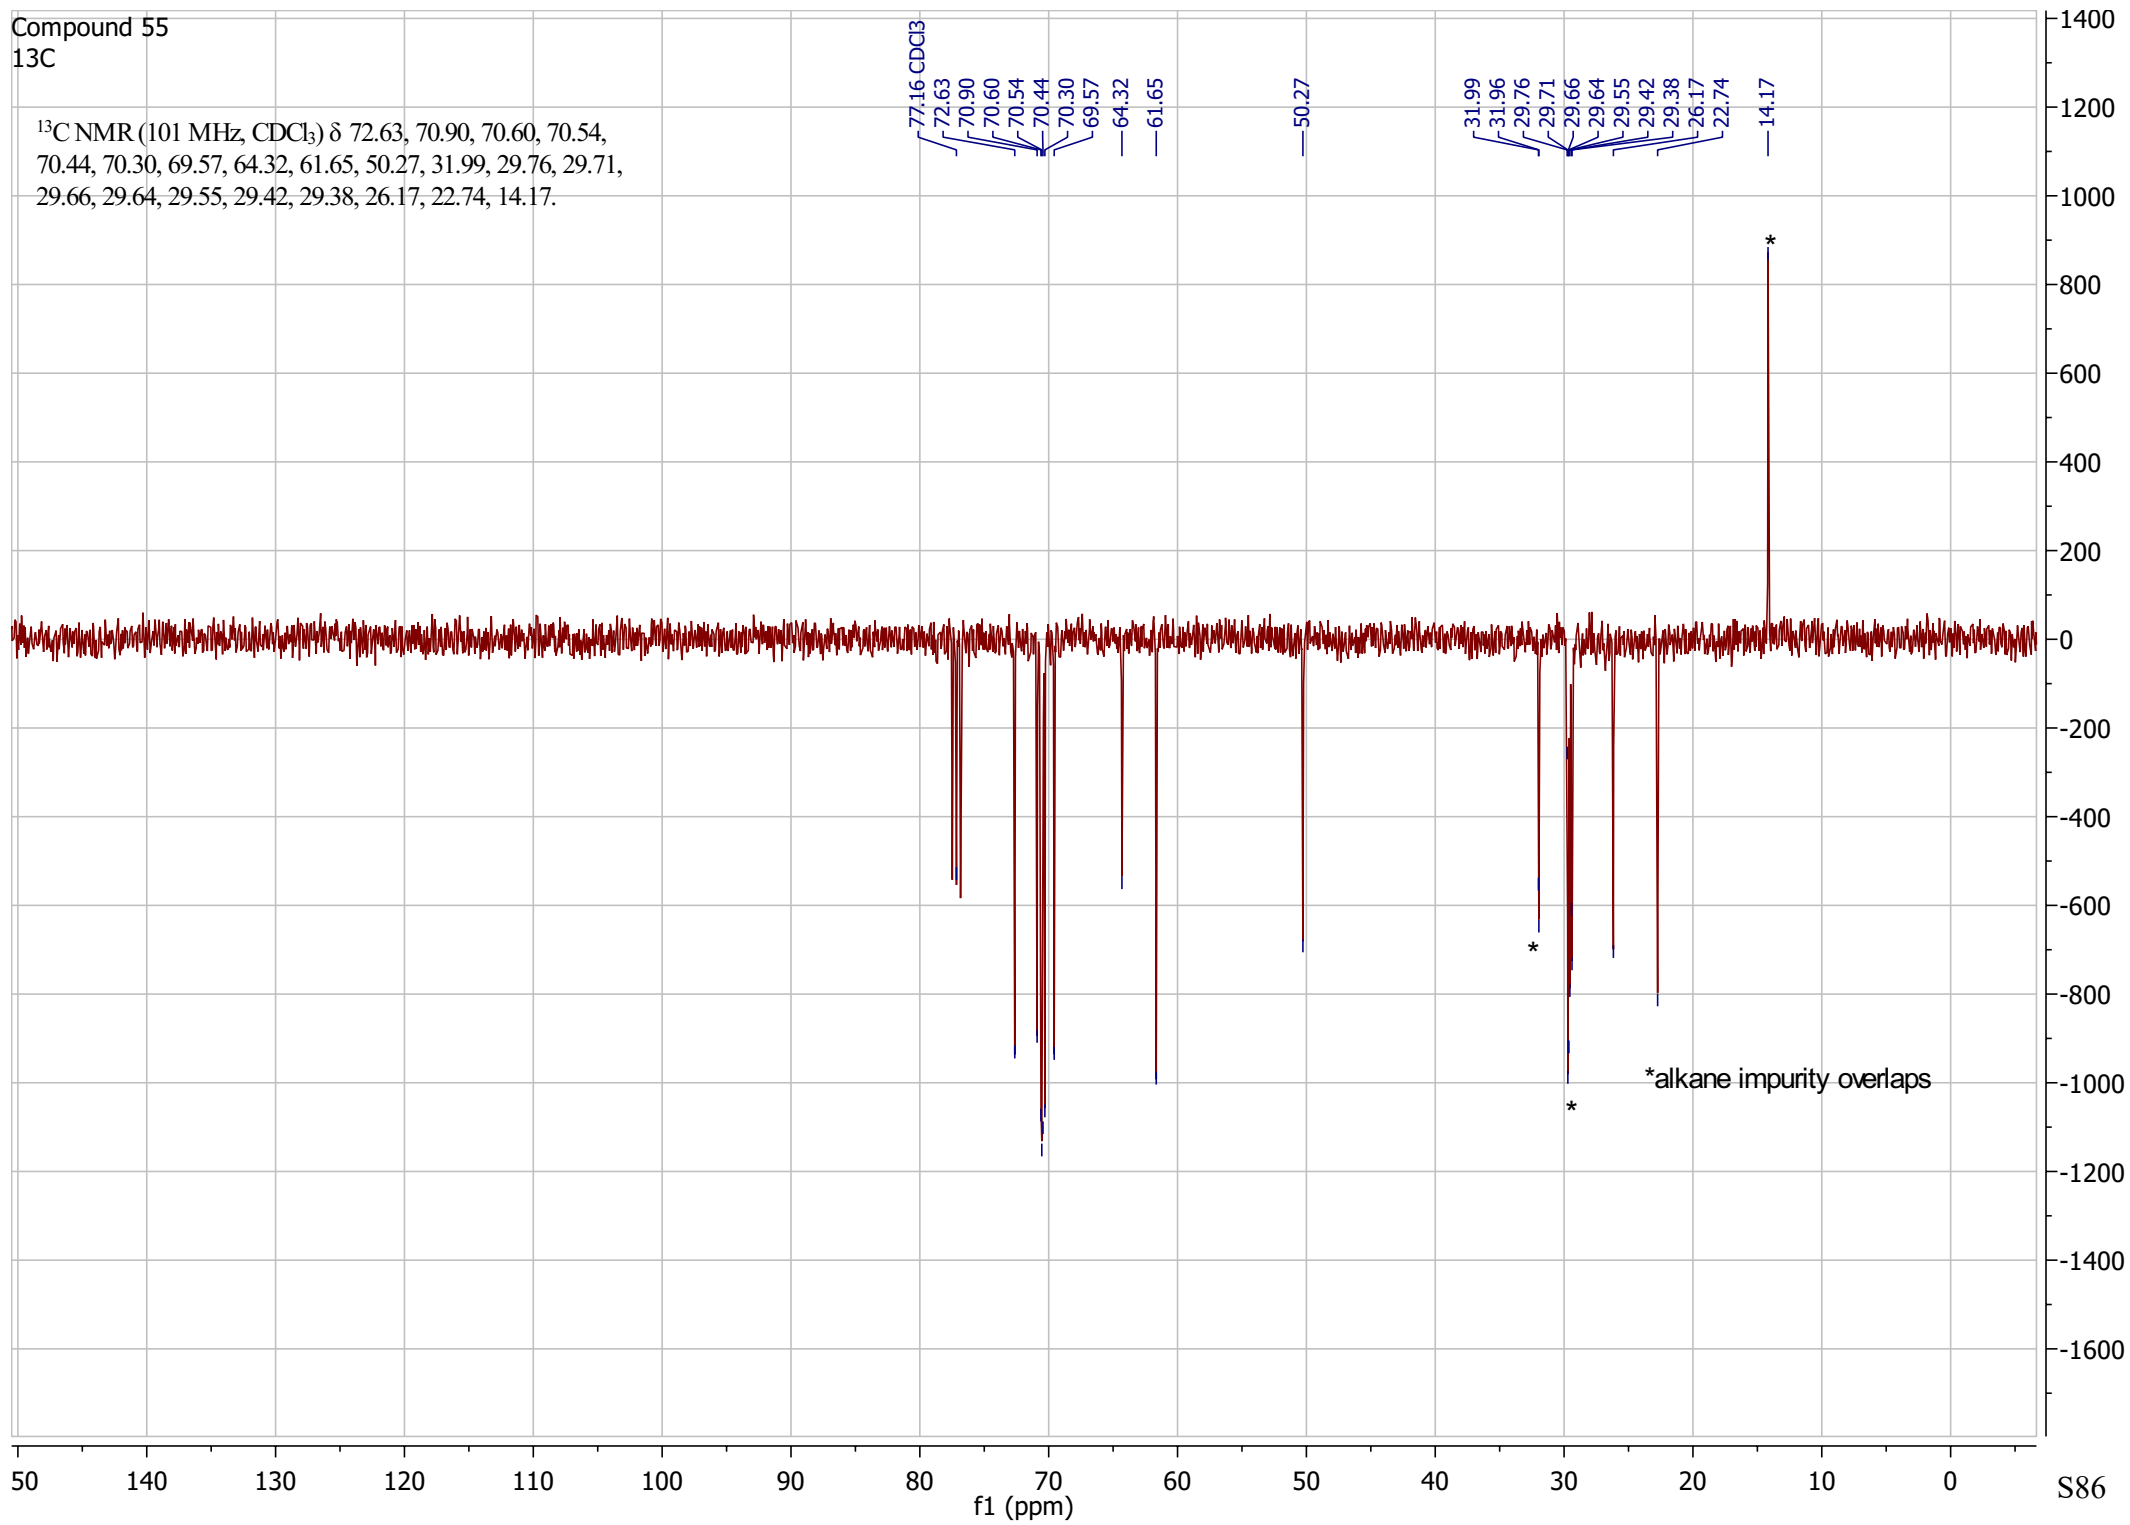

## Compound 56

<sup>1</sup>H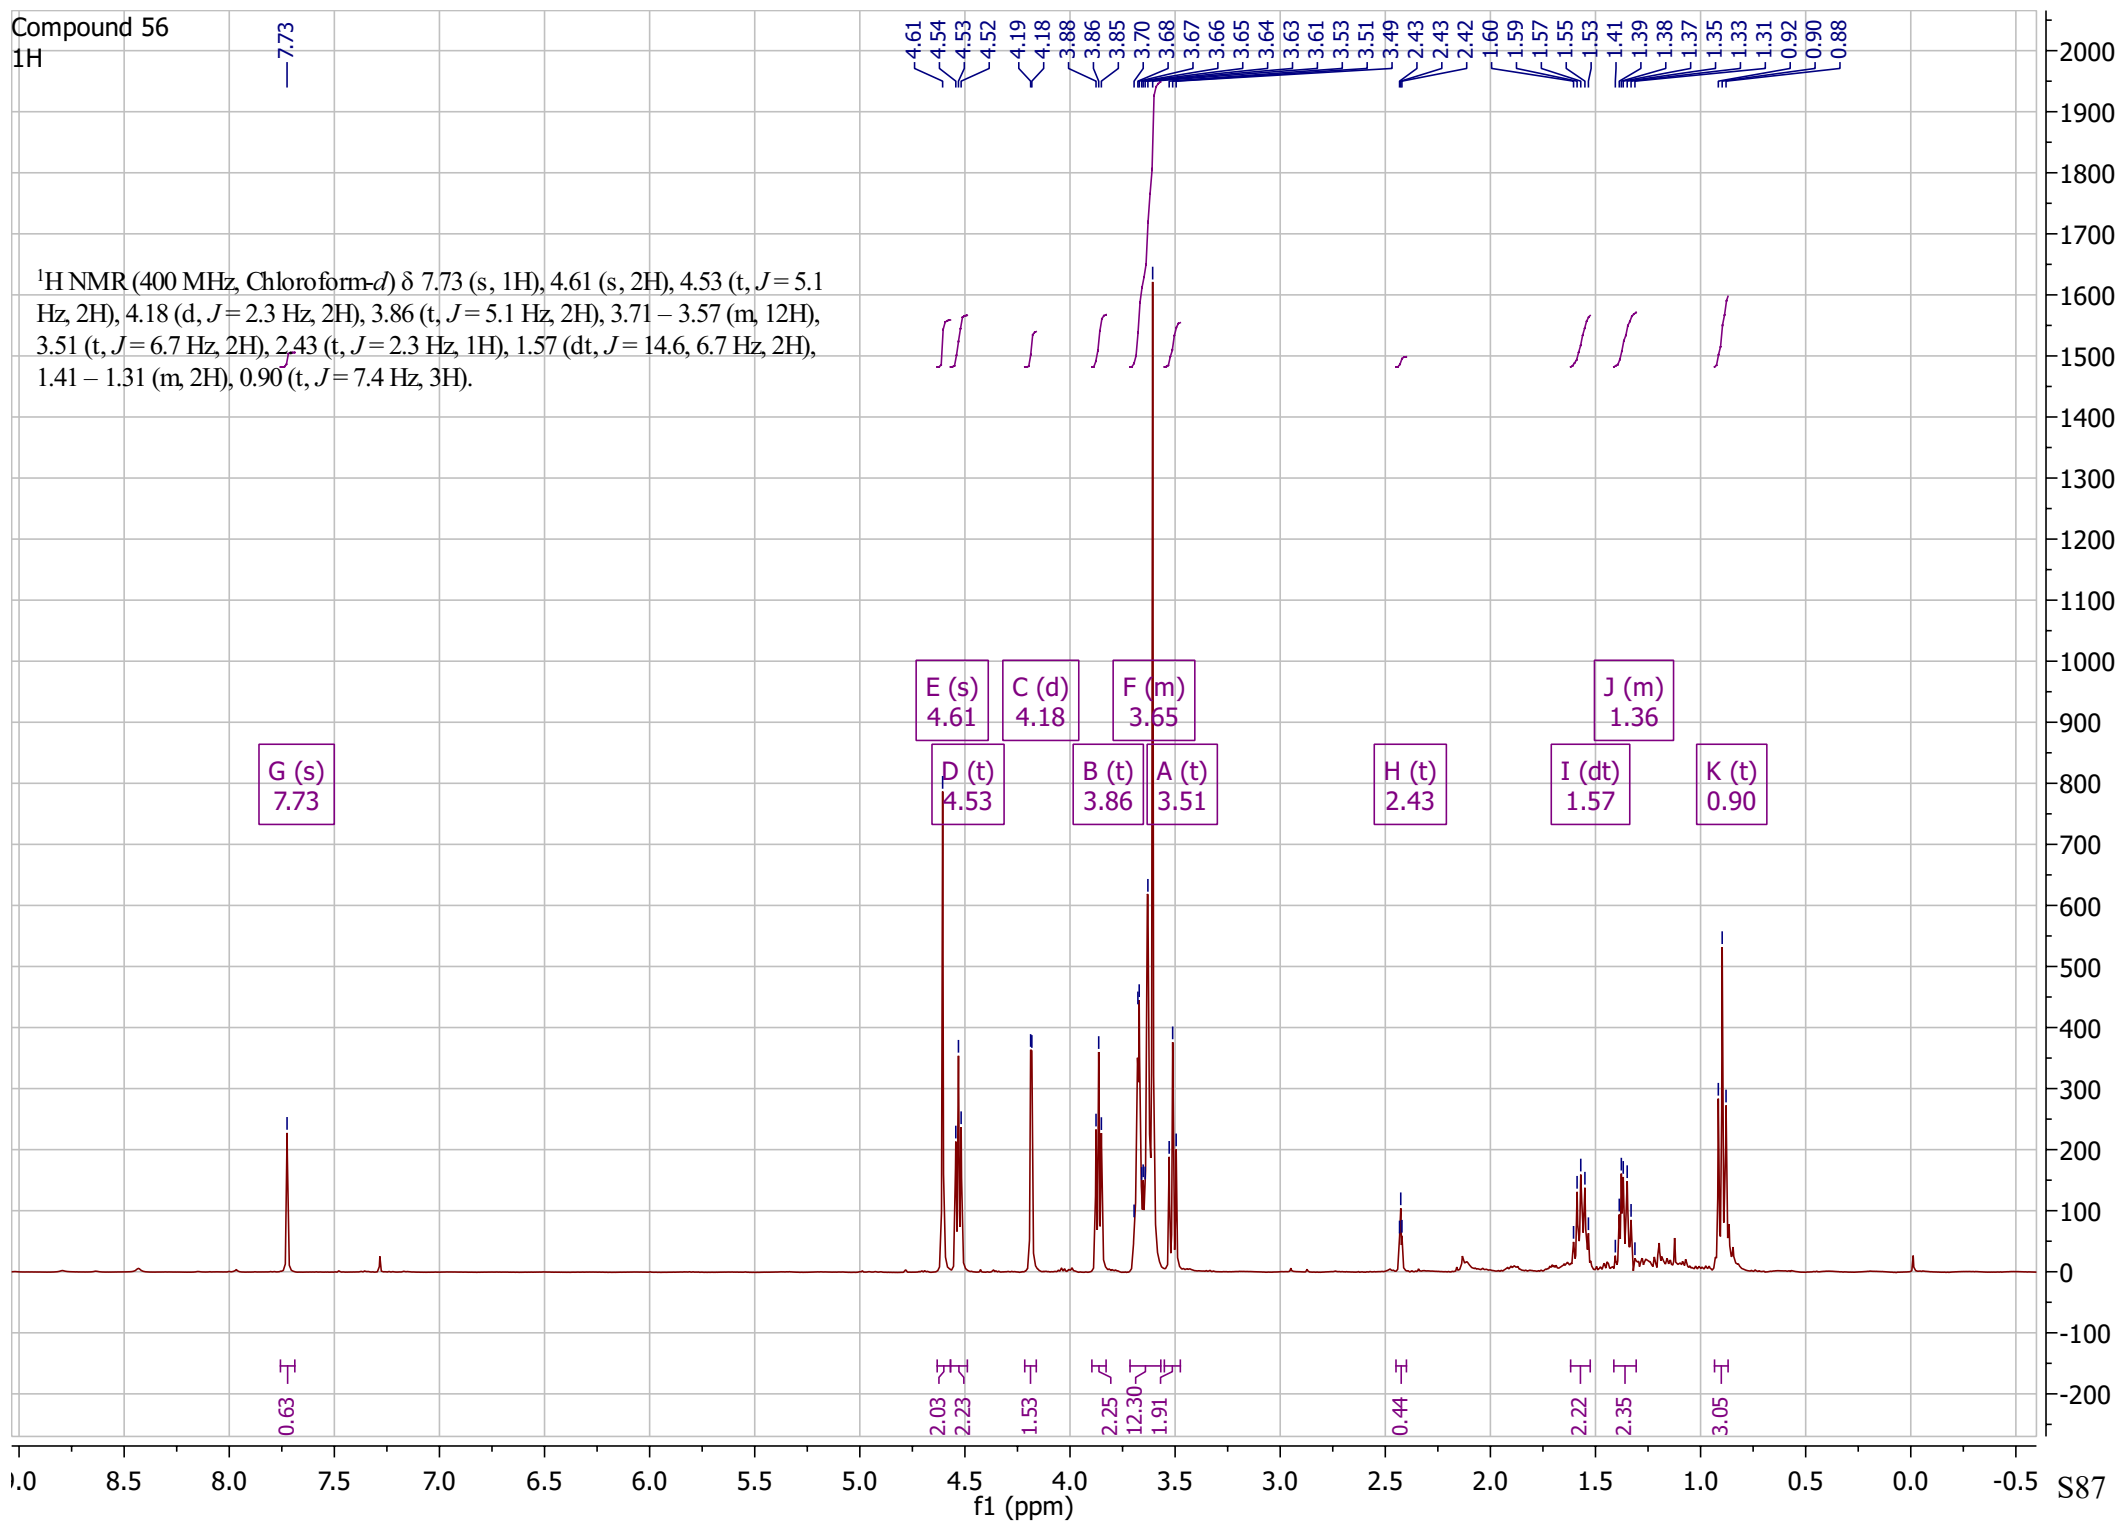

Compound 56  
13C

$^{13}\text{C}$  NMR (101 MHz,  $\text{CDCl}_3$ )  $\delta$  145.37, 123.68, 74.64, 70.66, 70.63, 70.55, 70.53, 70.47, 69.56, 69.17, 64.34, 58.45, 50.30, 31.78, 19.36, 13.97.

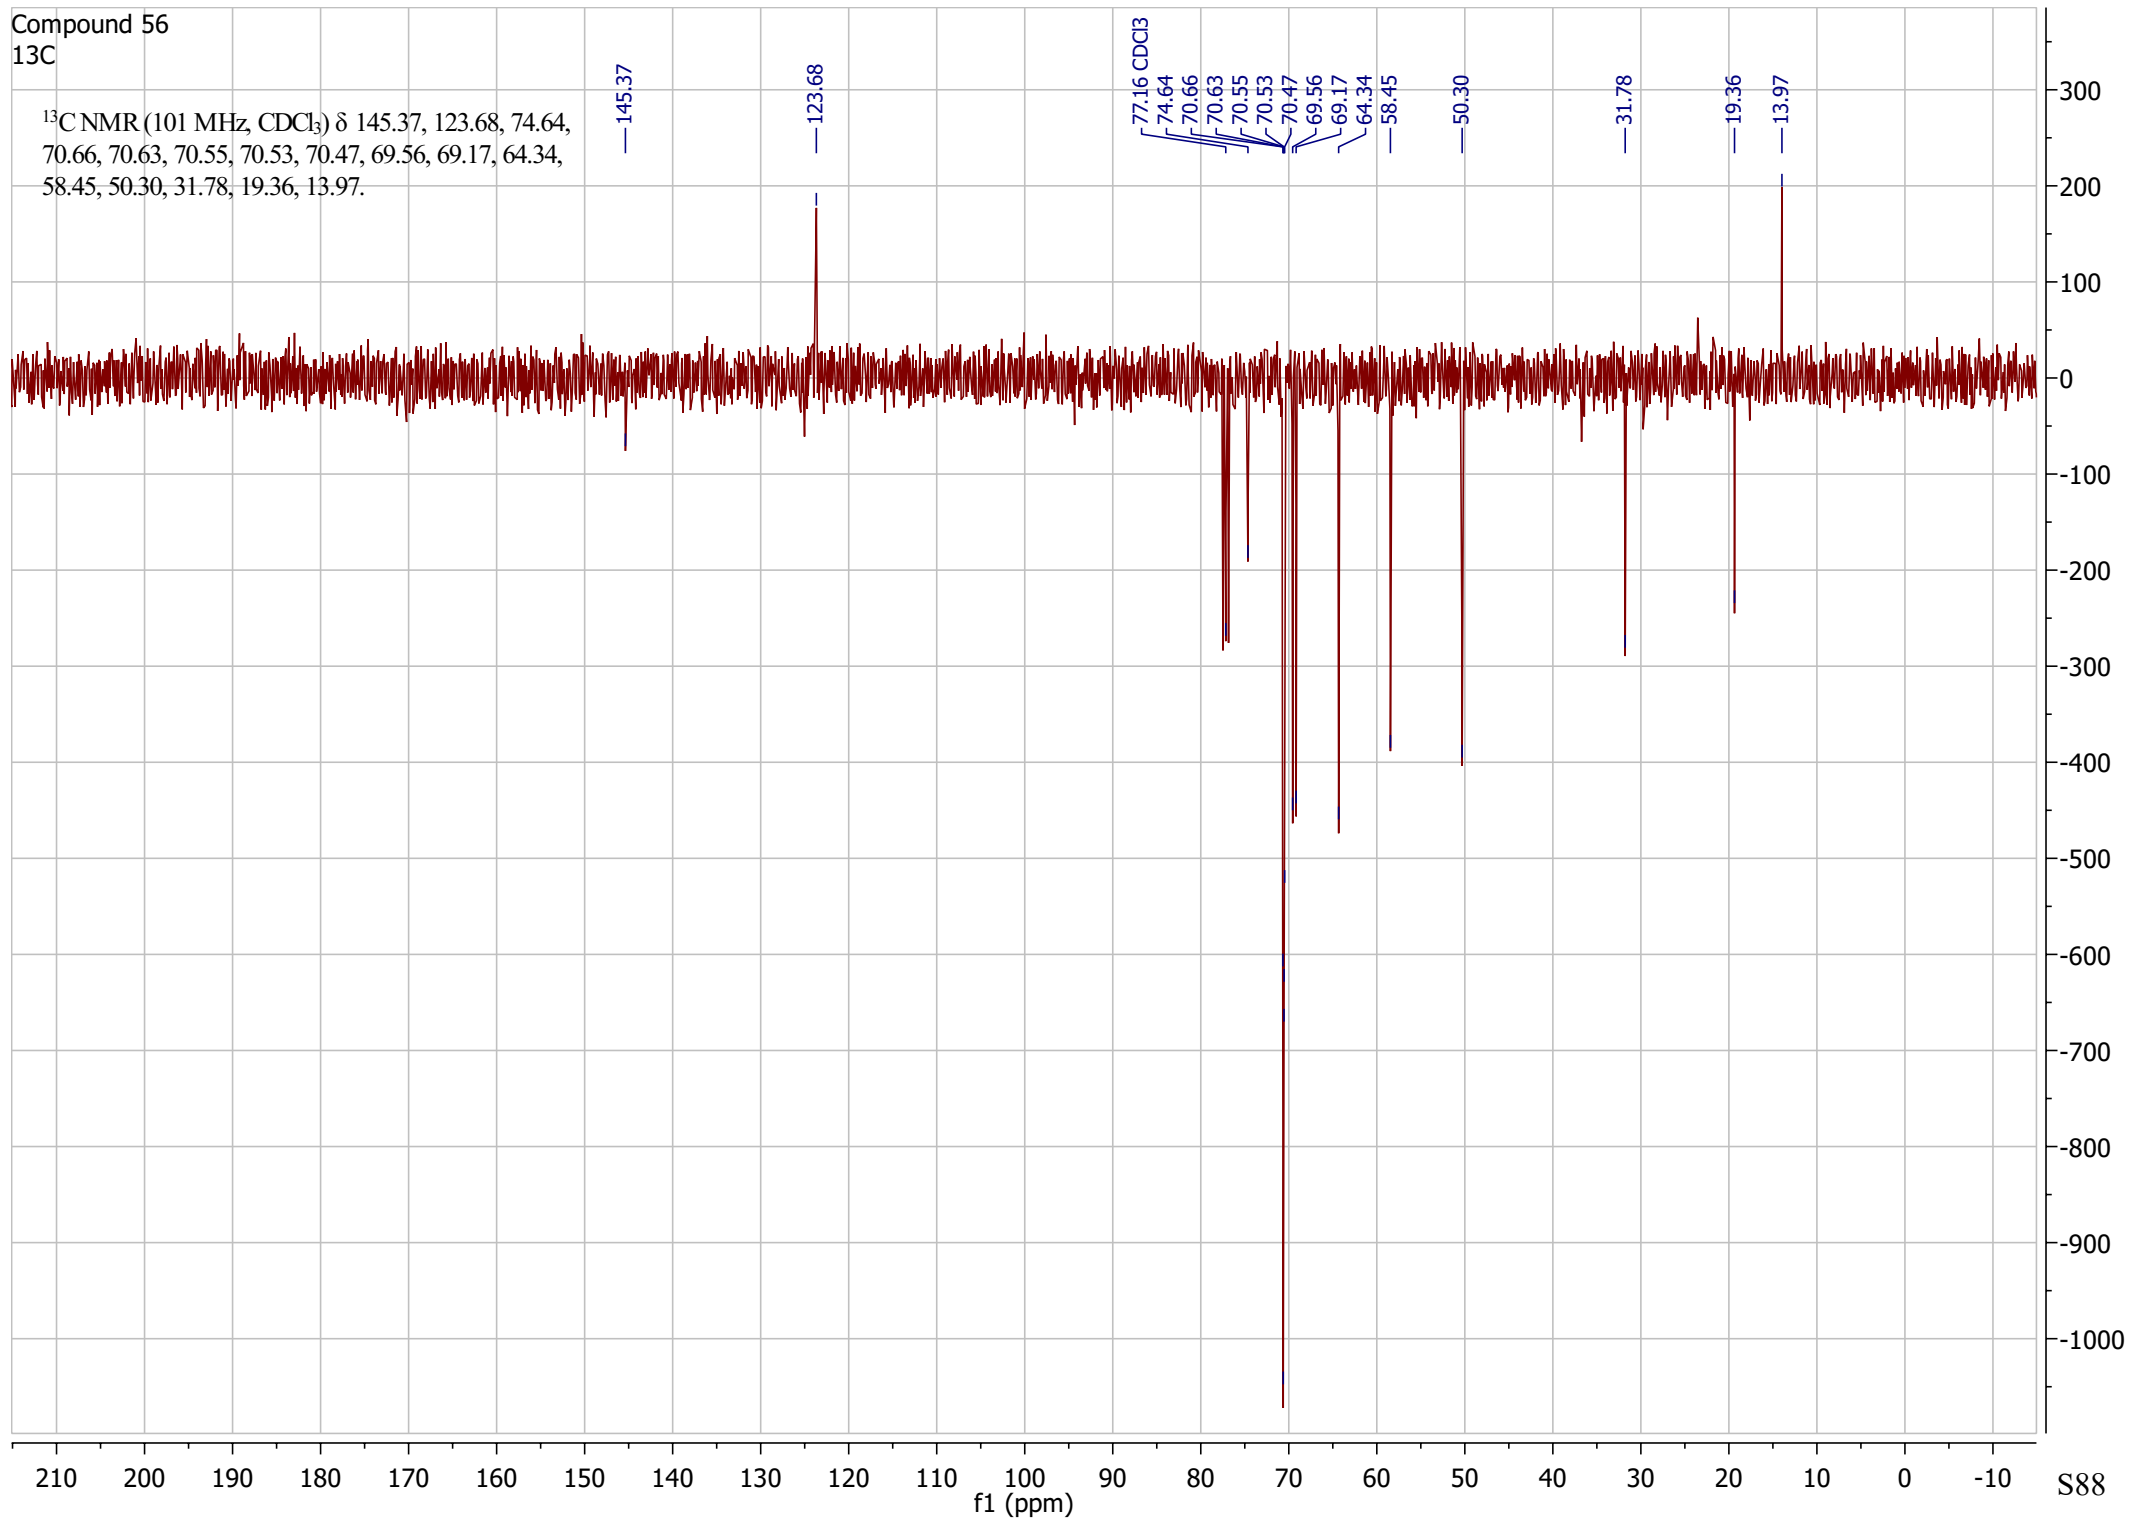

Compound 57  
1H

<sup>1</sup>H NMR (400 MHz, Chloroform-*d*) δ 7.73 (s, 1H), 4.61 (s, 2H), 4.54 (t, *J* = 5.1 Hz, 2H), 4.19 (d, *J* = 2.3 Hz, 2H), 3.88 (t, *J* = 5.1 Hz, 2H), 3.73 – 3.59 (m, 12H), 3.51 (t, *J* = 6.7 Hz, 2H), 2.44 (t, *J* = 2.4 Hz, 1H), 1.59 (p, *J* = 6.9 Hz, 2H), 1.40 – 1.21 (m, 6H), 0.88 (t, *J* = 6.7 Hz, 3H).

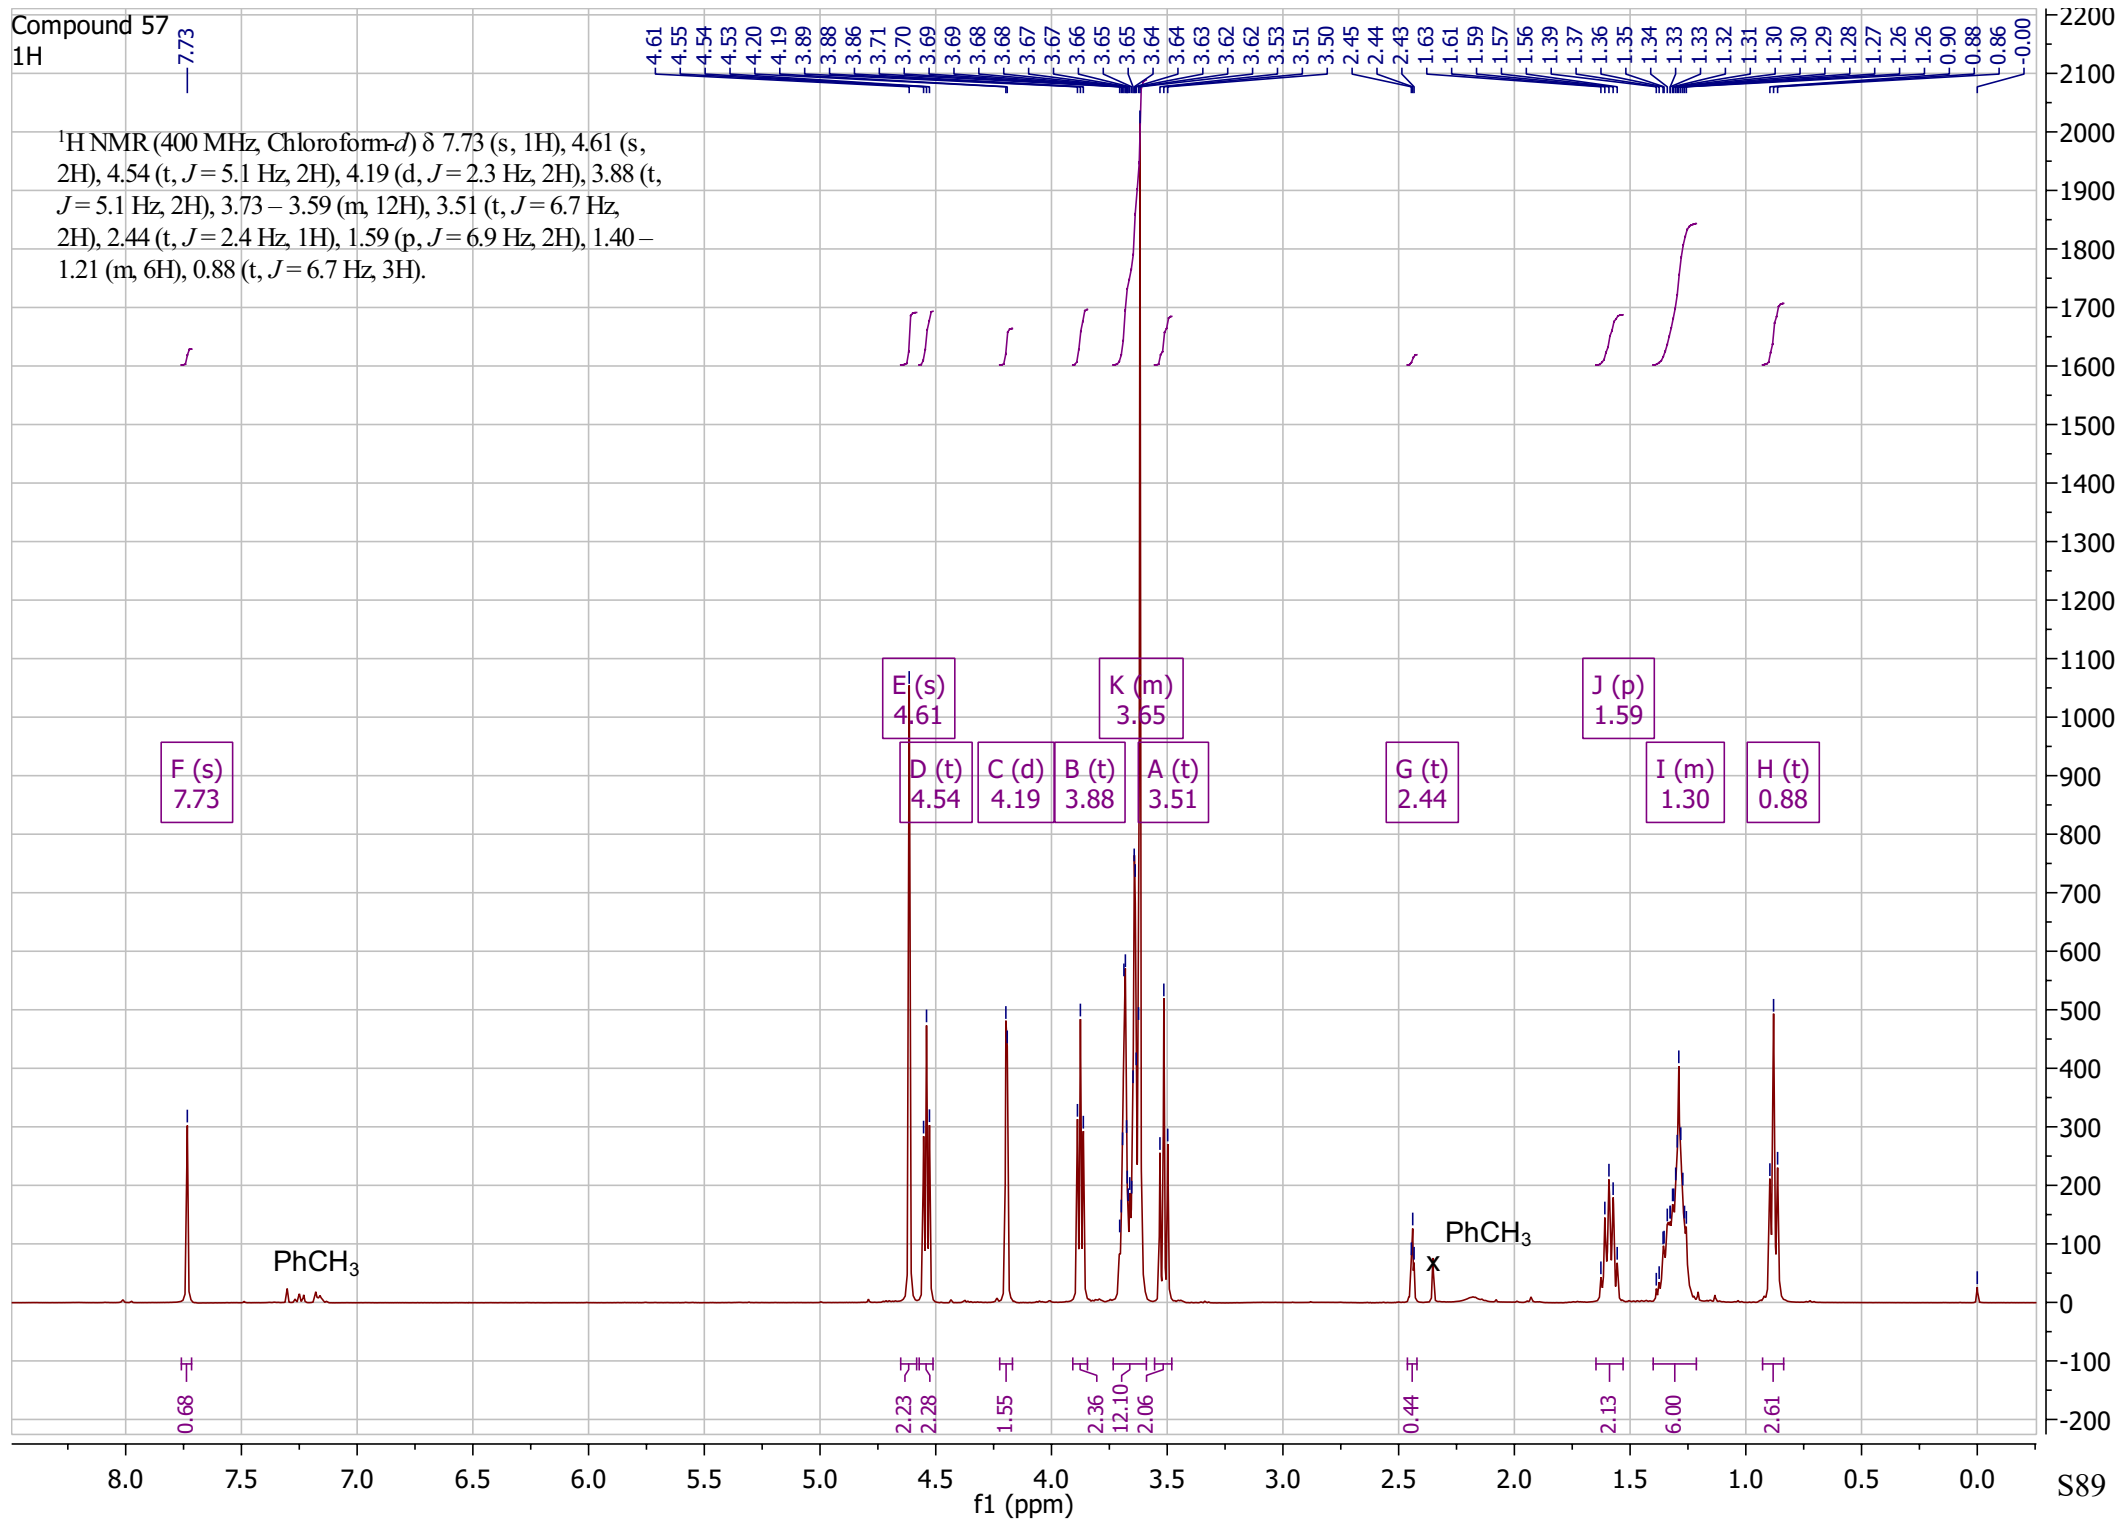

Compound 57  
13C

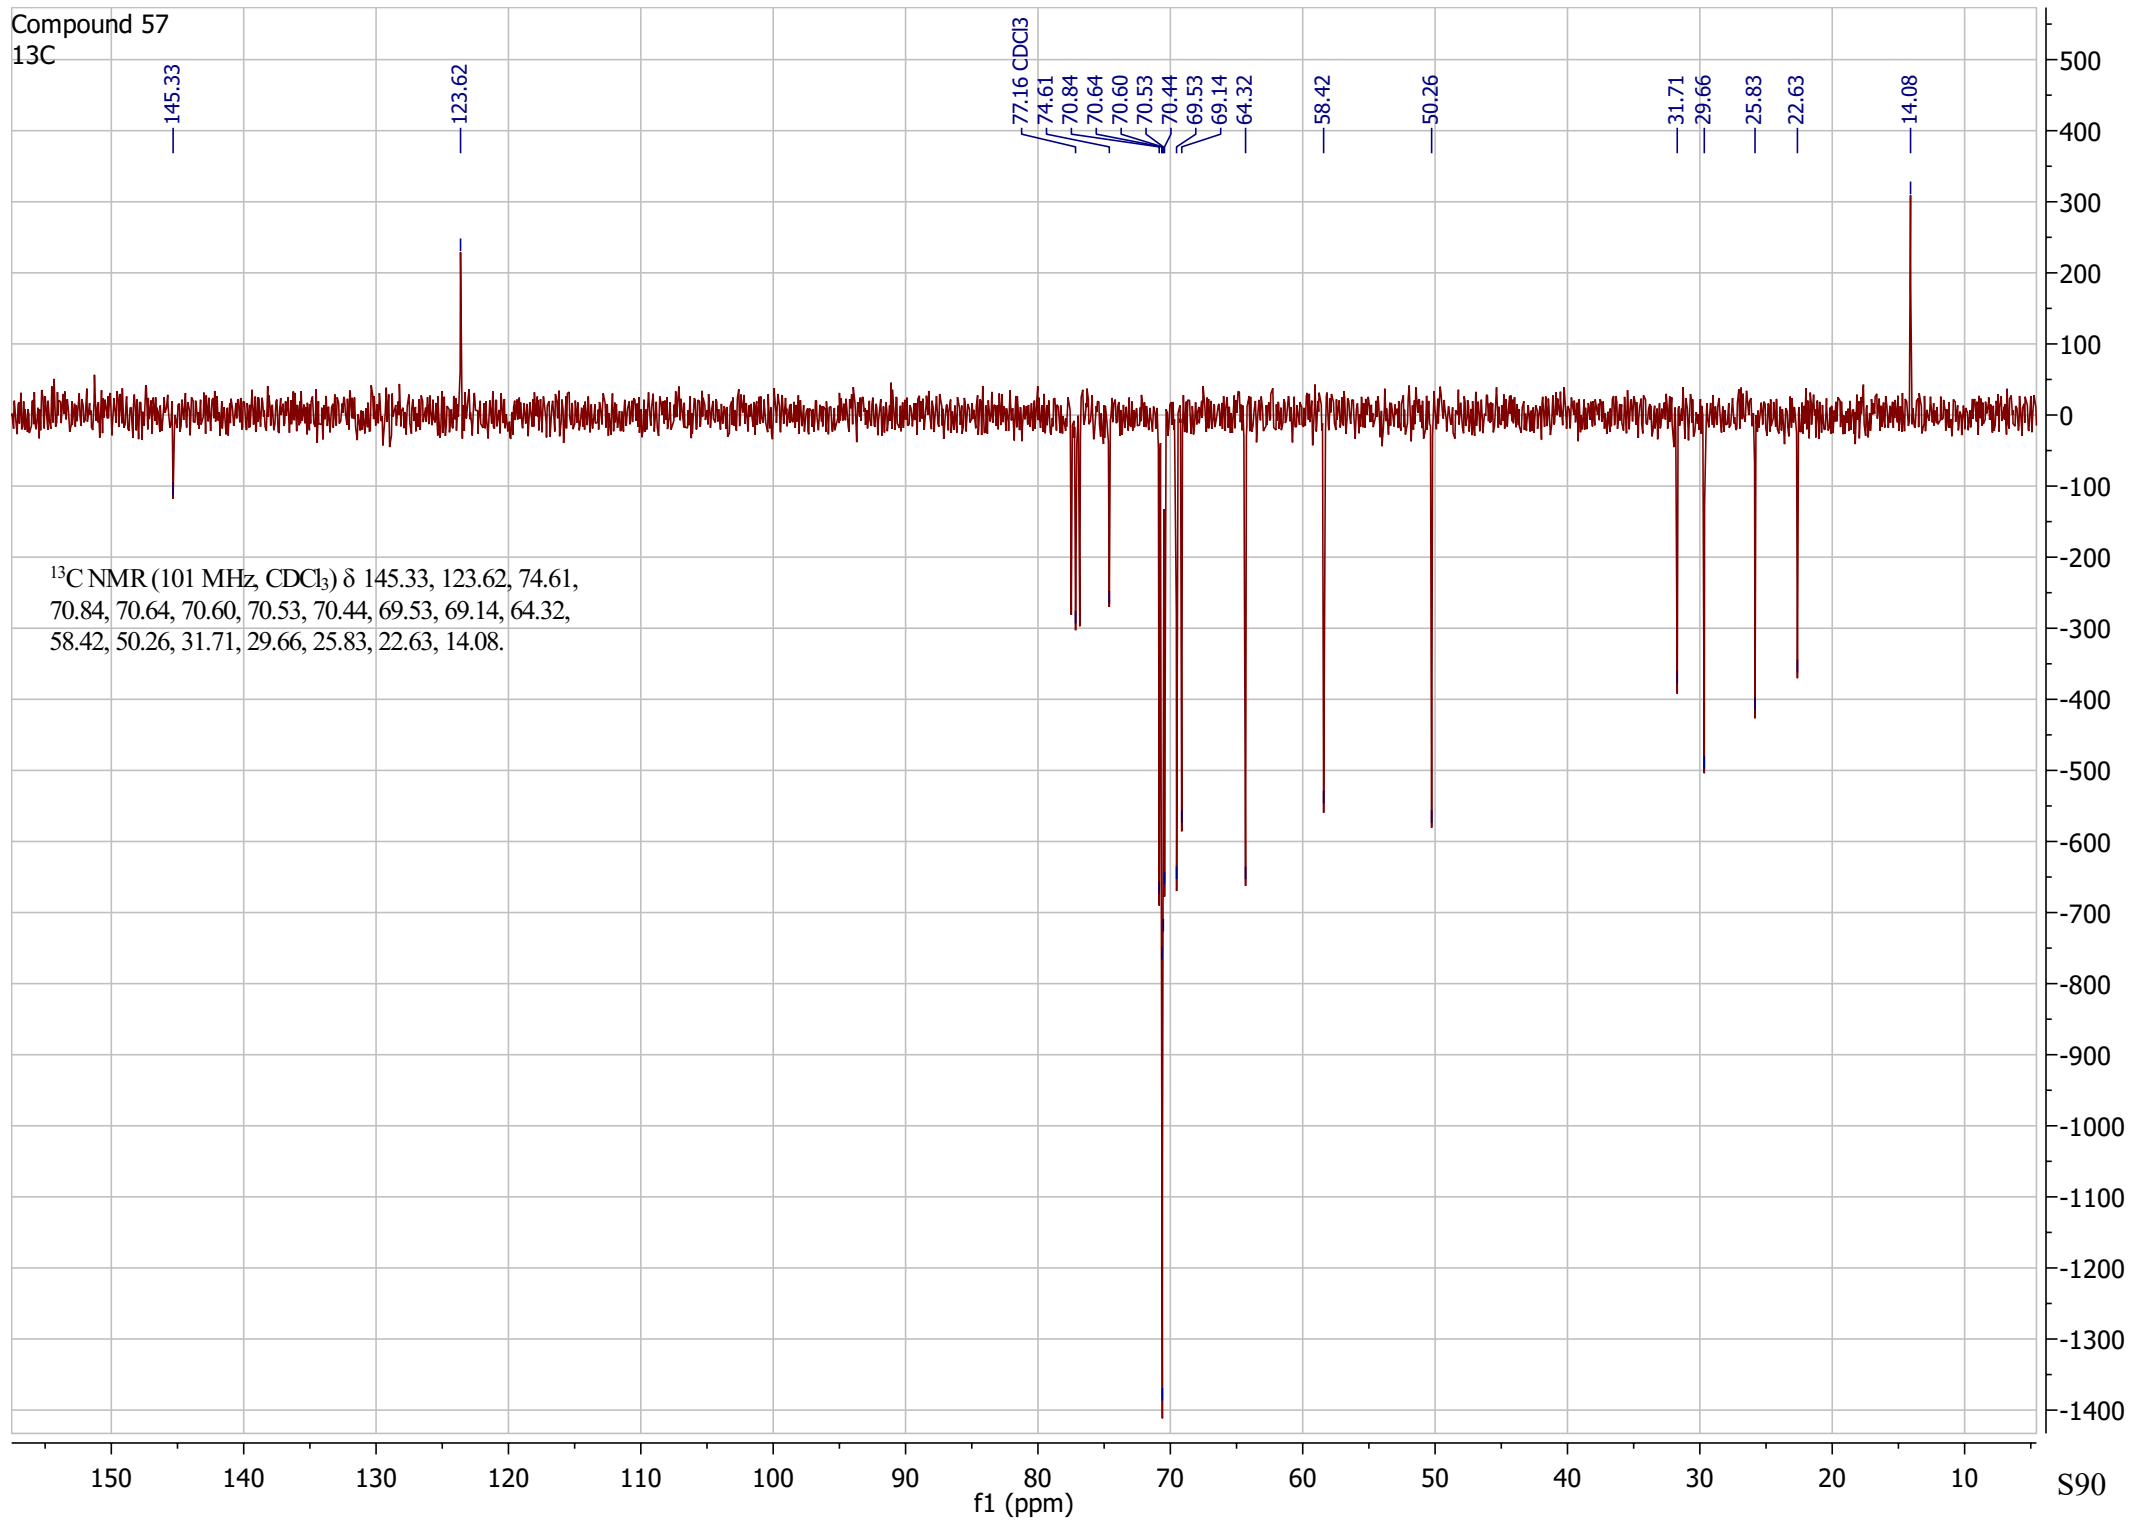

Compound 58  
1H

$^1\text{H NMR}$  (360 MHz, Chloroform- $d$ )  $\delta$  7.74 (s, 1H), 4.61 (s, 2H), 4.54 (t,  $J = 5.1$  Hz, 2H), 4.19 (d,  $J = 2.4$  Hz, 2H), 3.92 – 3.84 (m, 2H), 3.73 – 3.57 (m, 12H), 3.51 (t,  $J = 6.7$  Hz, 2H), 2.44 (t,  $J = 2.3$  Hz, 1H), 1.59 (dt,  $J = 14.4$ , 6.8 Hz, 2H), 1.38 – 1.21 (m, 10H), 0.88 (t,  $J = 6.8$  Hz, 3H).

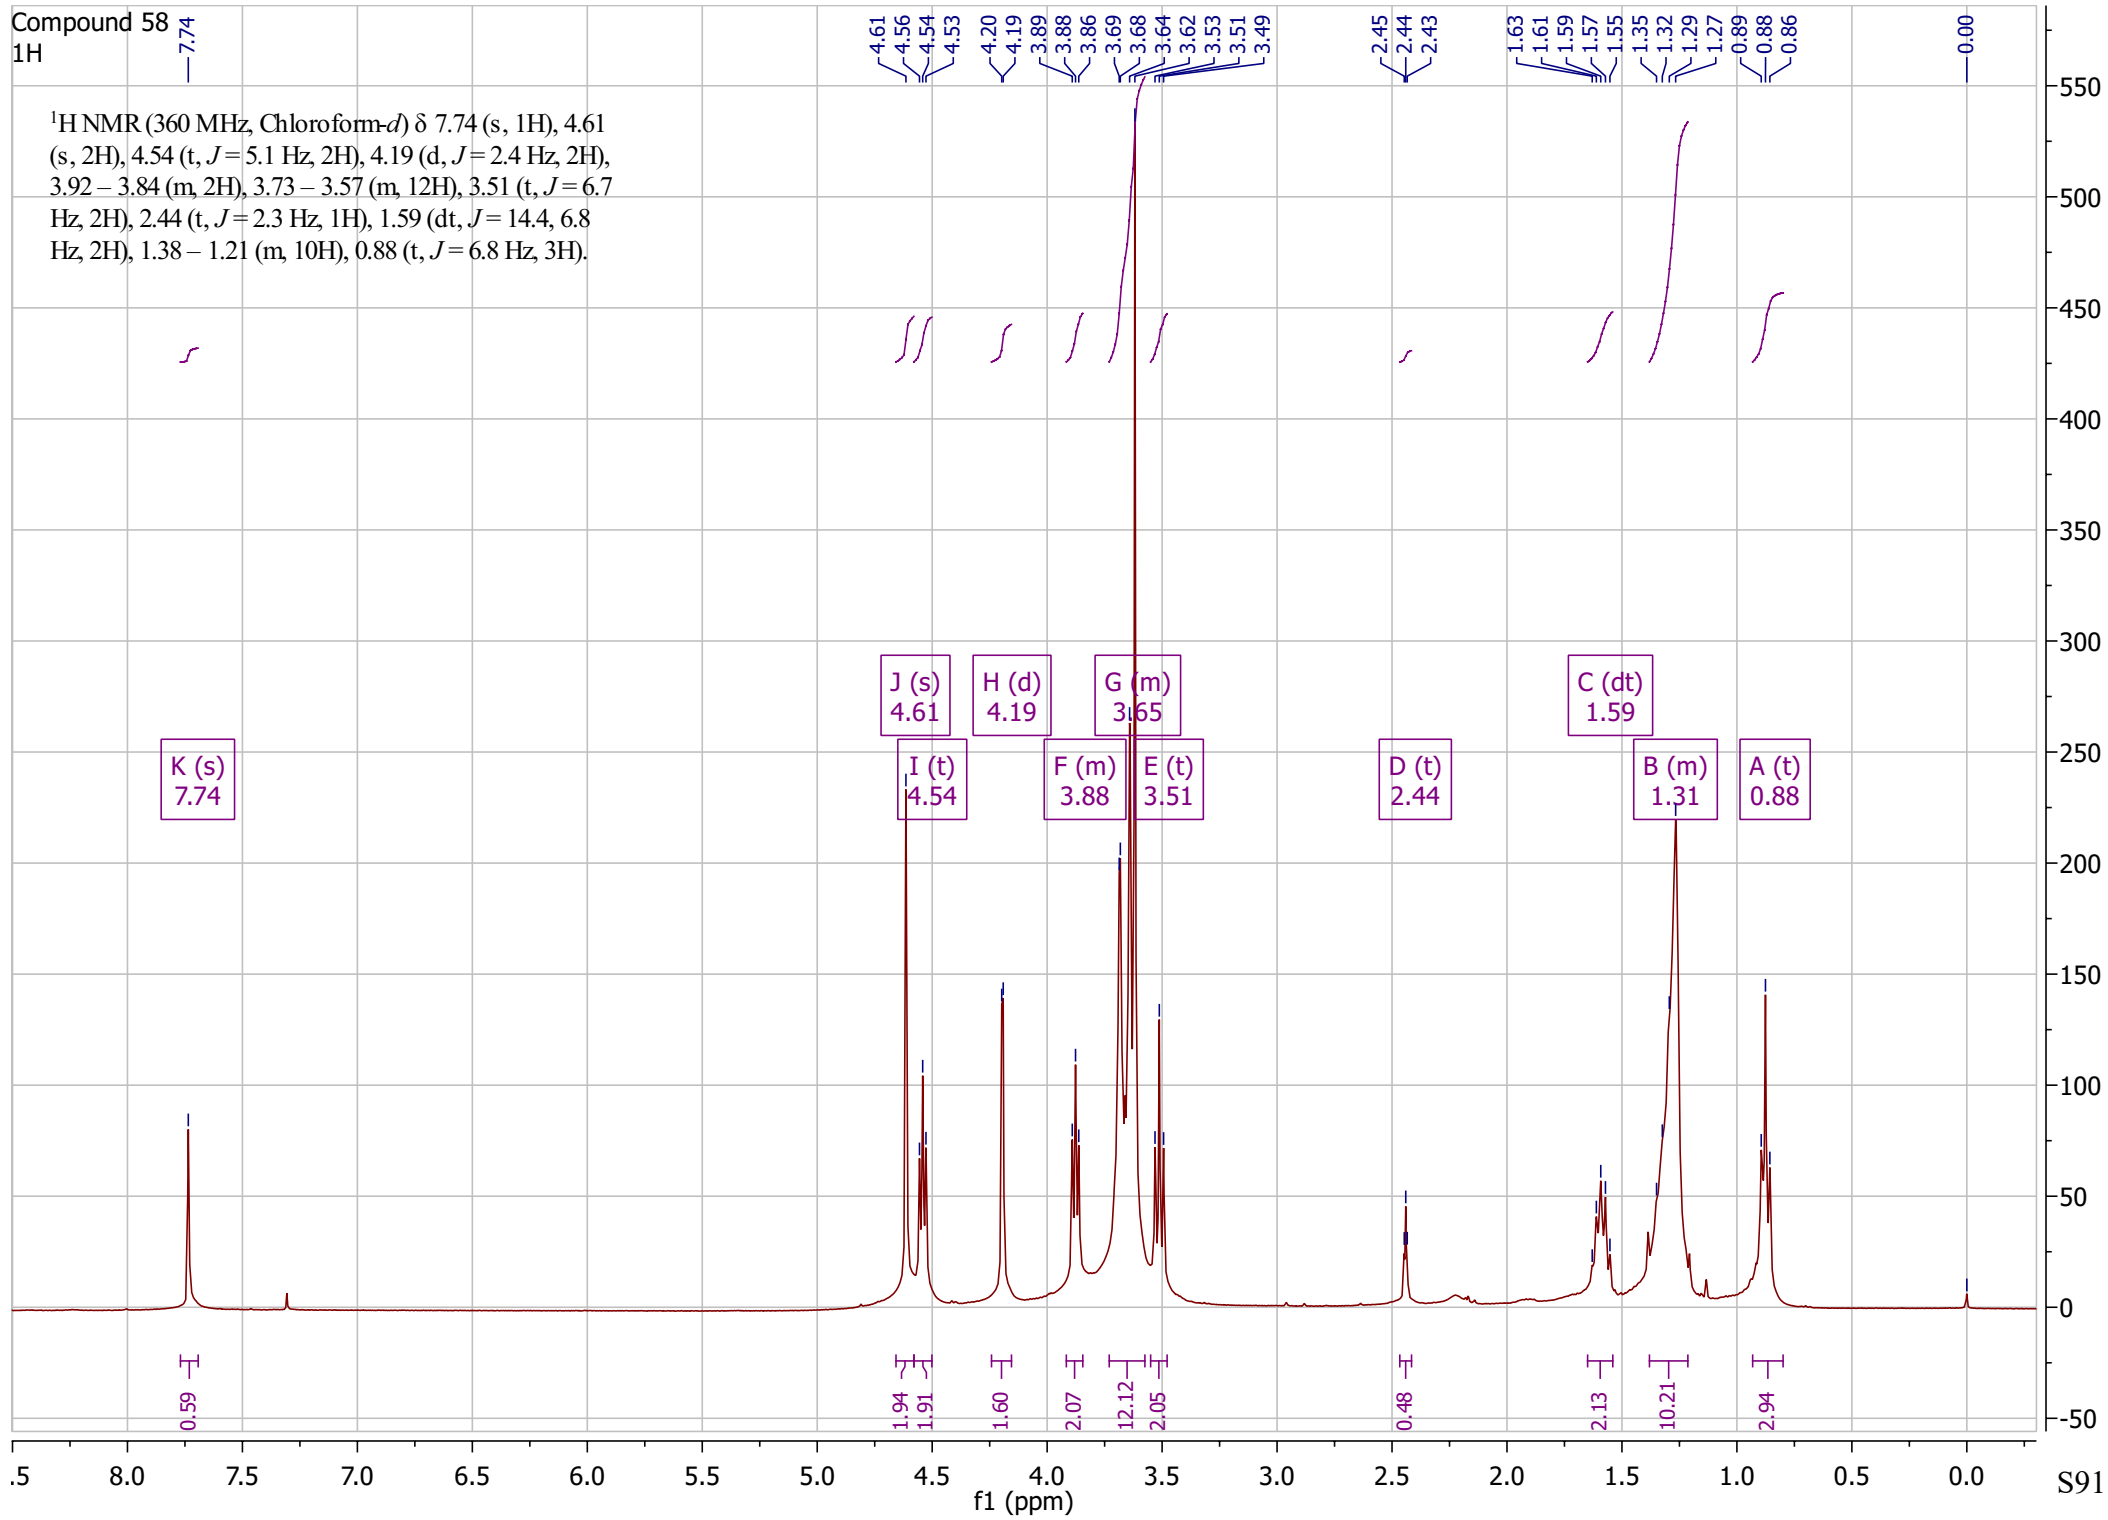

Compound 58  
13C

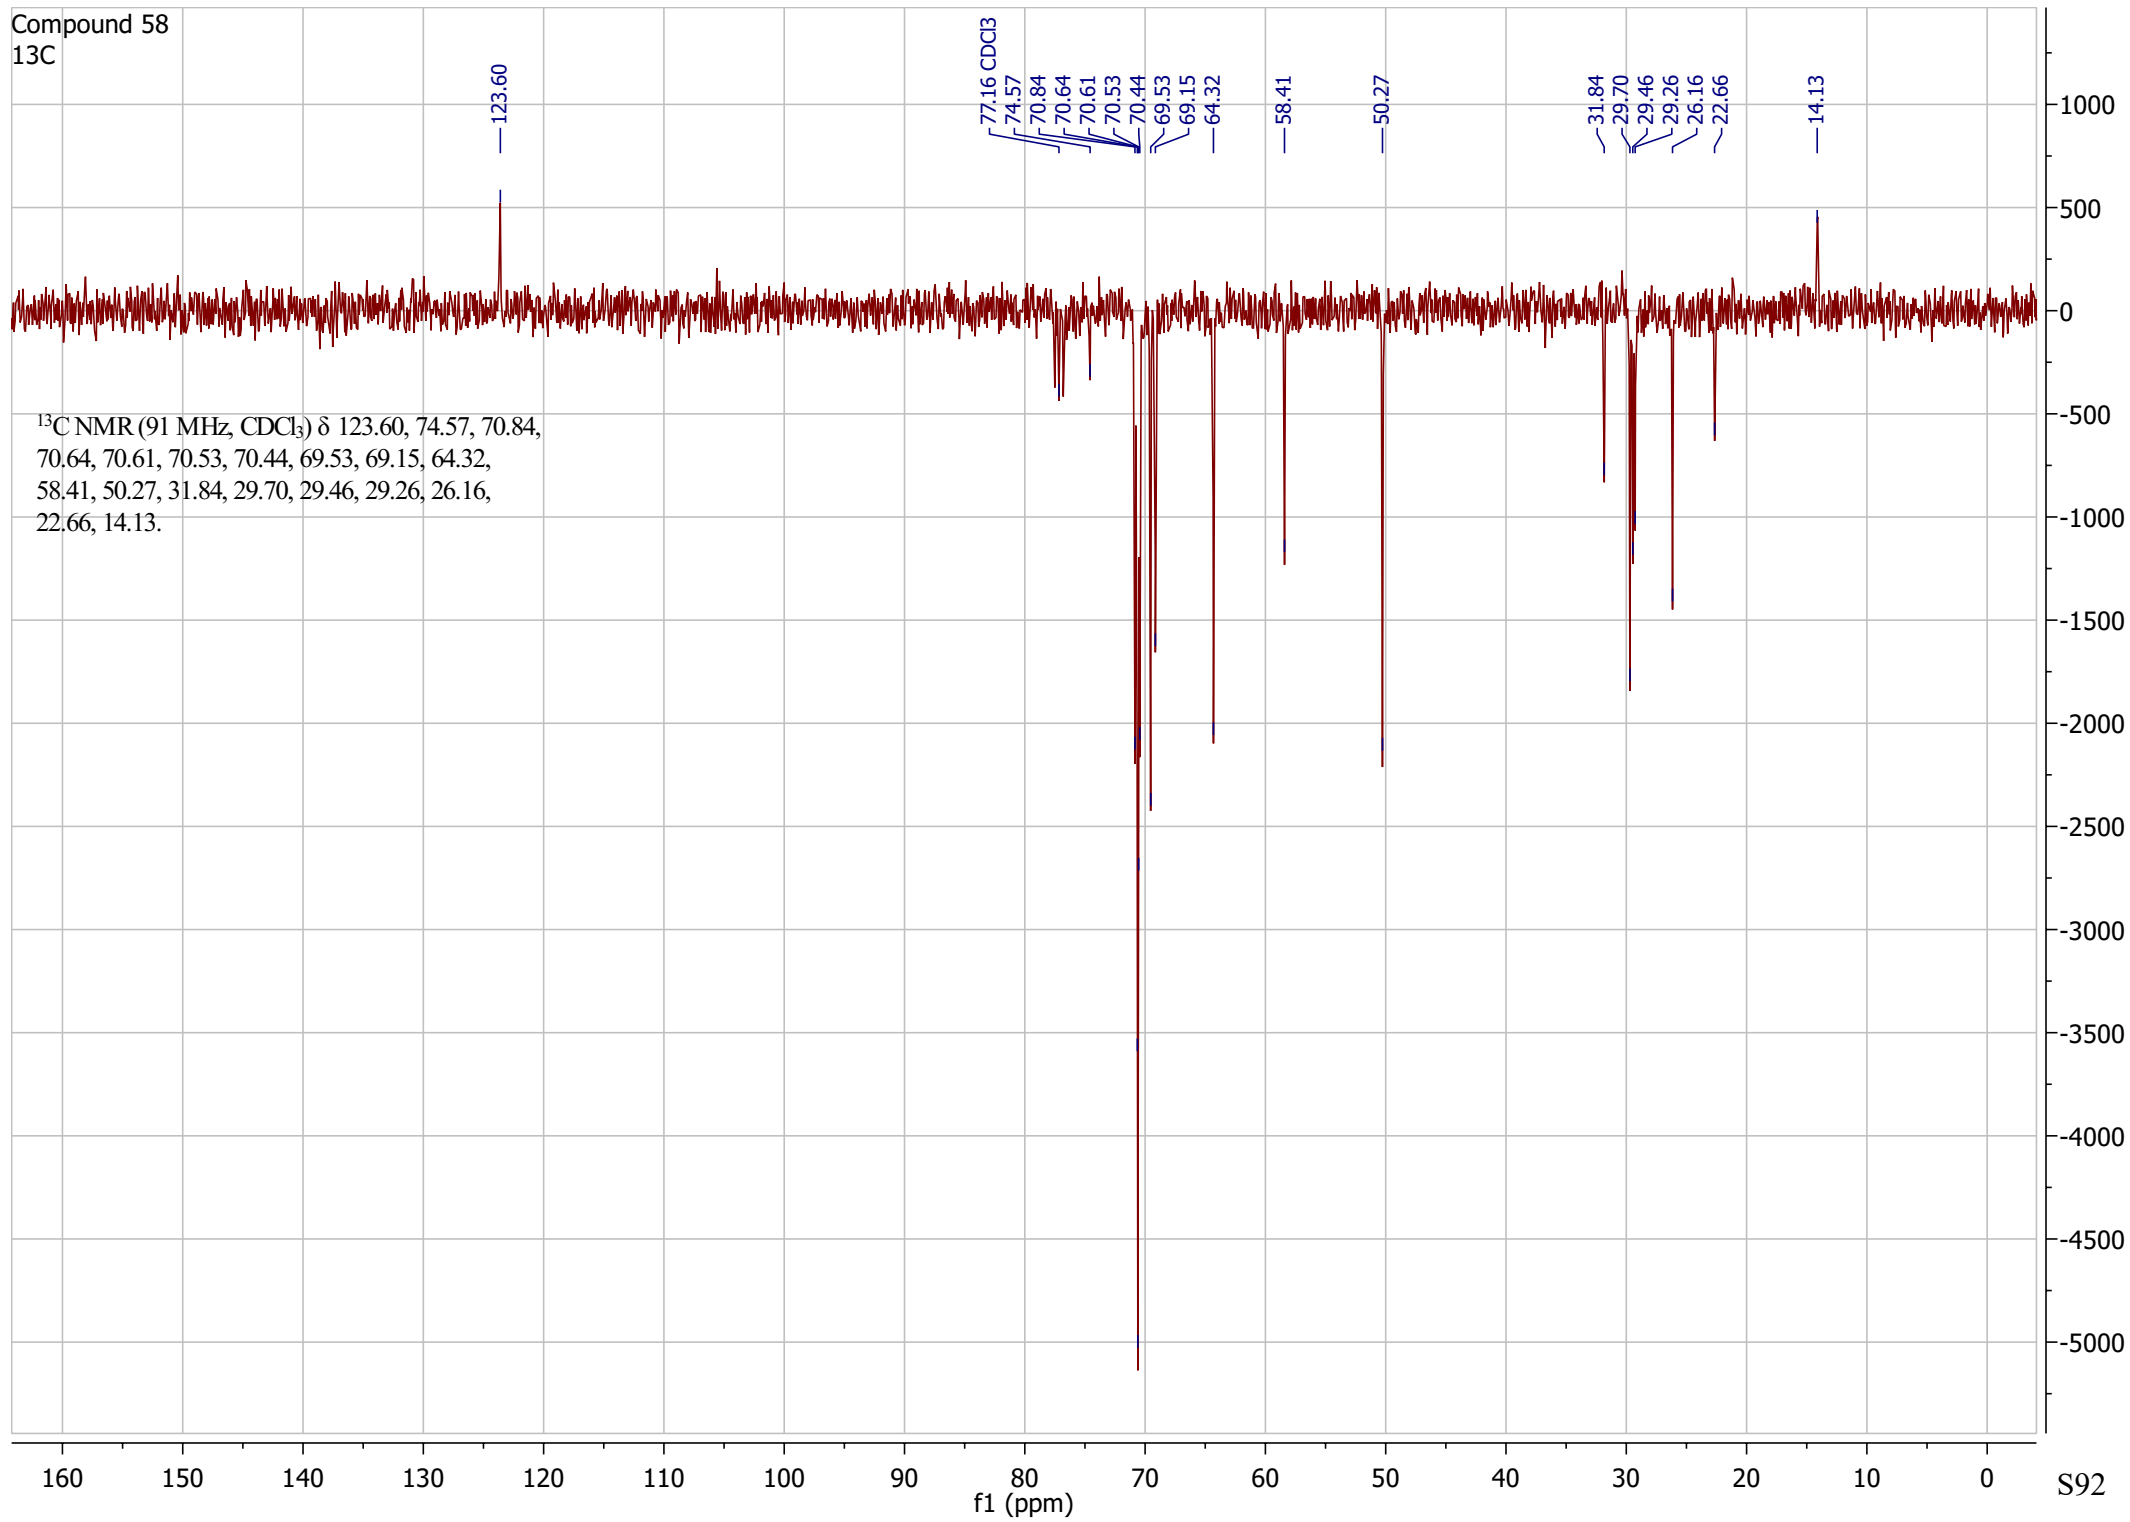



Compound 59  
1H

$^1\text{H}$  NMR (360 MHz, Chloroform- $d$ )  $\delta$  7.73 (s, 1H), 4.62 (s, 2H), 4.54 (t,  $J = 5.1$  Hz, 2H), 4.20 (d,  $J = 2.4$  Hz, 2H), 3.94 – 3.82 (m, 2H), 3.78 – 3.57 (m, 12H), 3.51 (t,  $J = 6.7$  Hz, 2H), 2.44 (t,  $J = 2.4$  Hz, 1H), 1.59 (p,  $J = 6.6$  Hz, 2H), 1.26 (s, 14H), 0.88 (t,  $J = 6.7$  Hz, 3H).

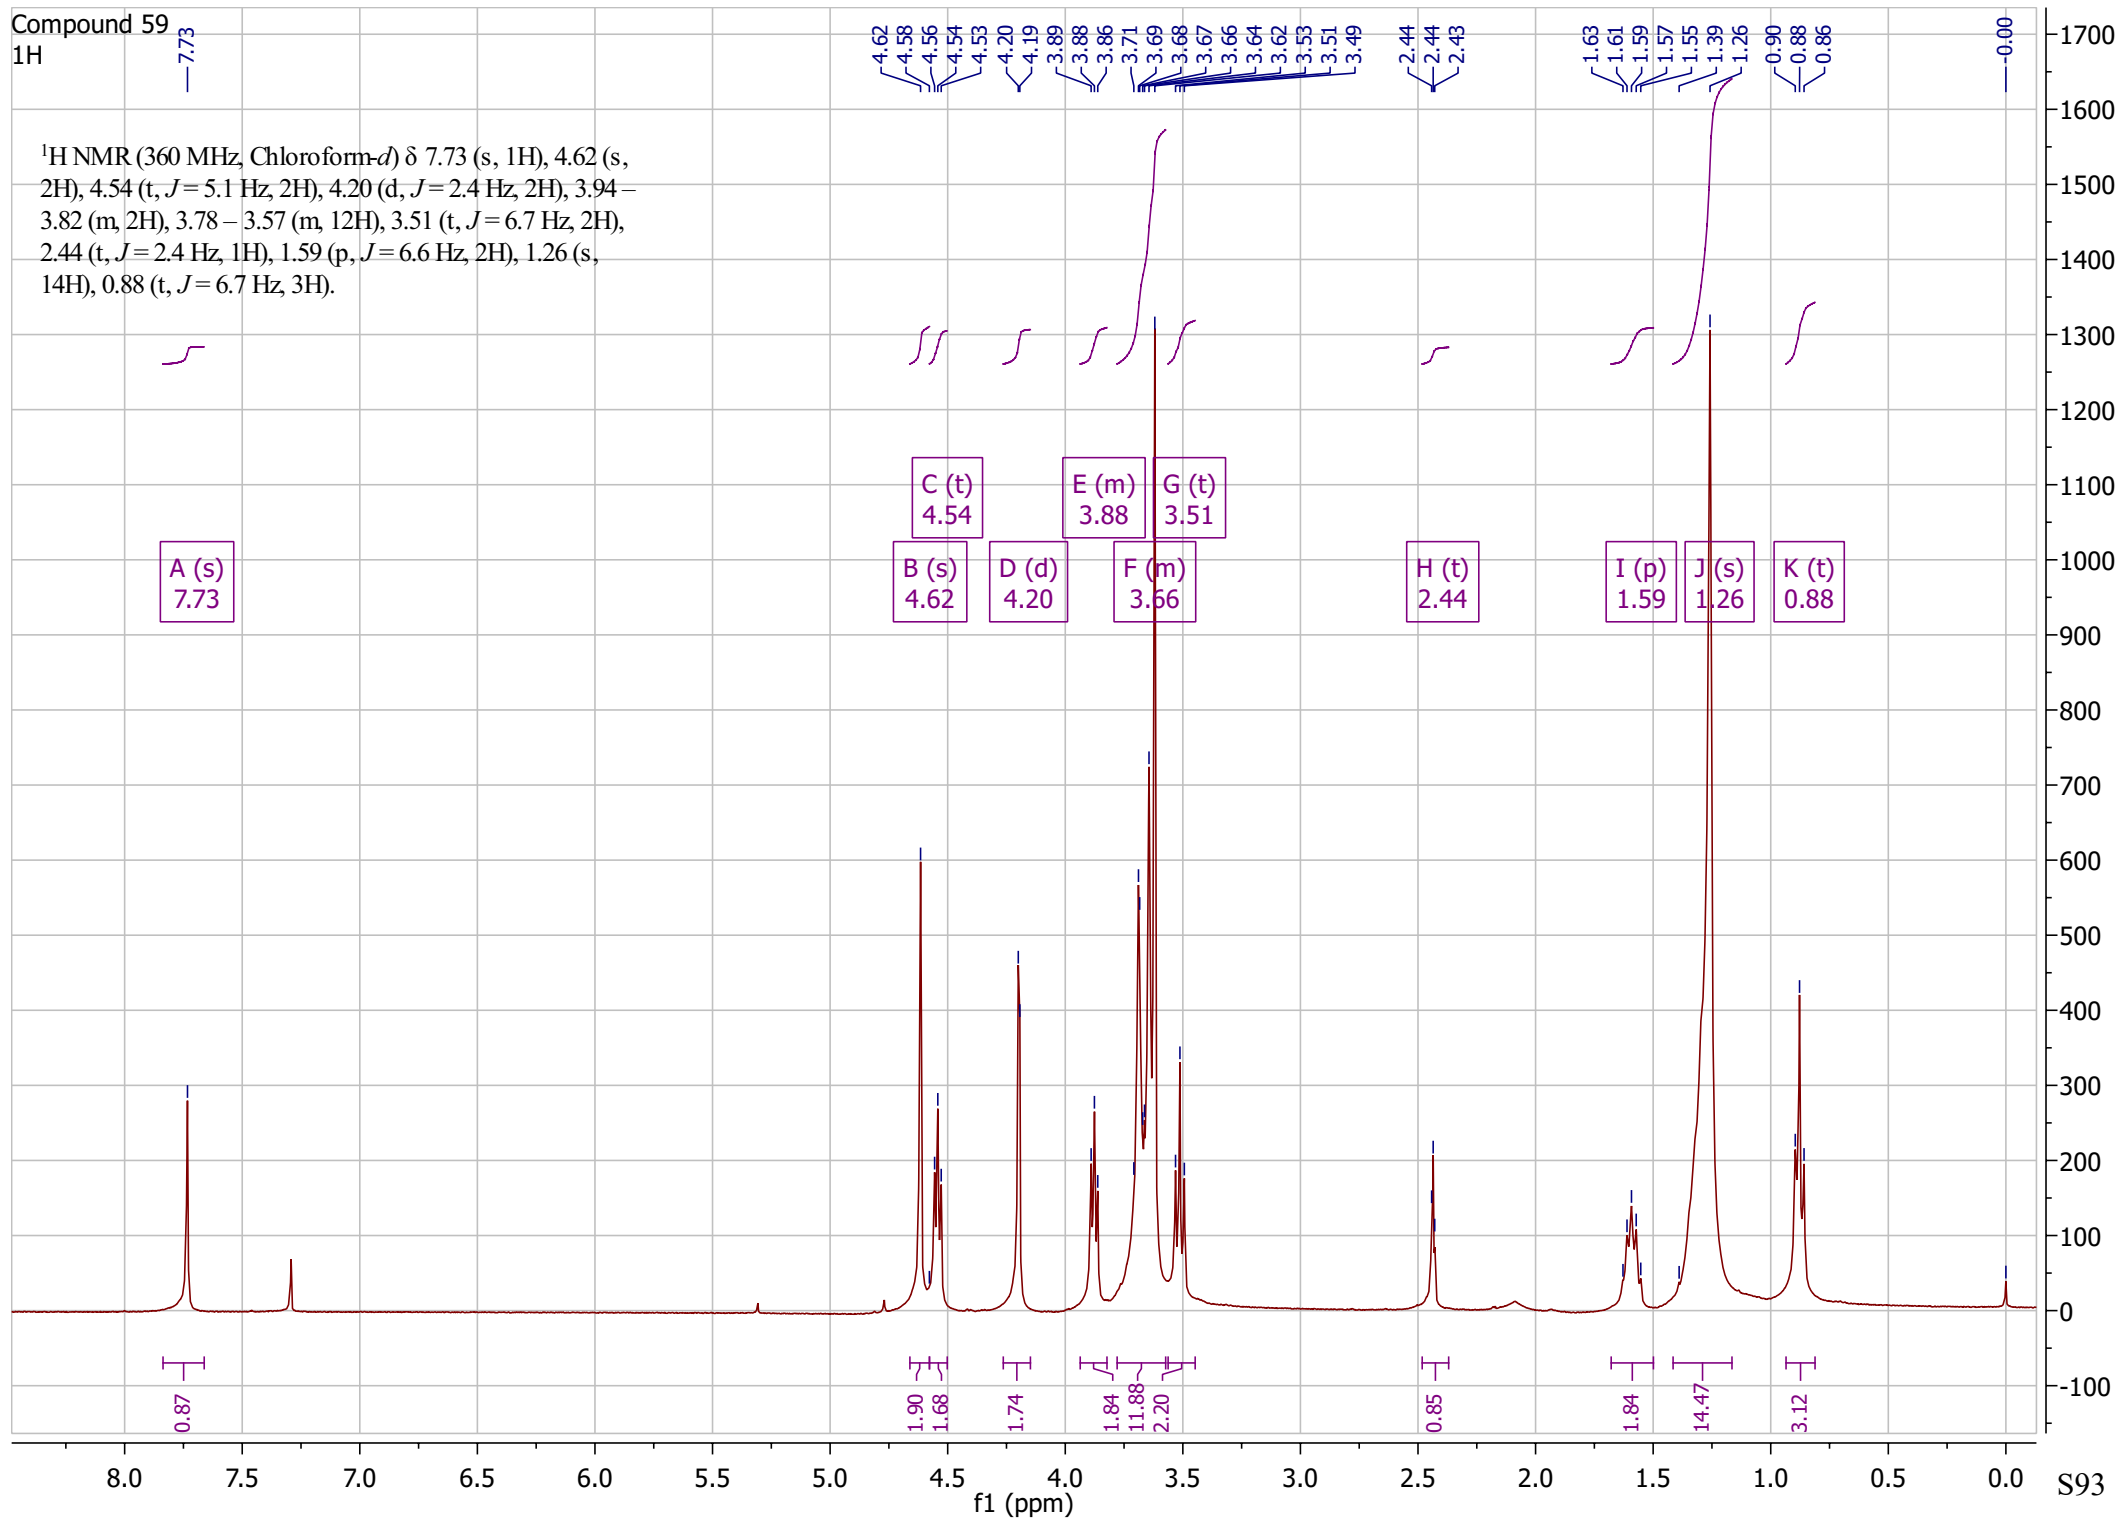

Compound 59  
13C

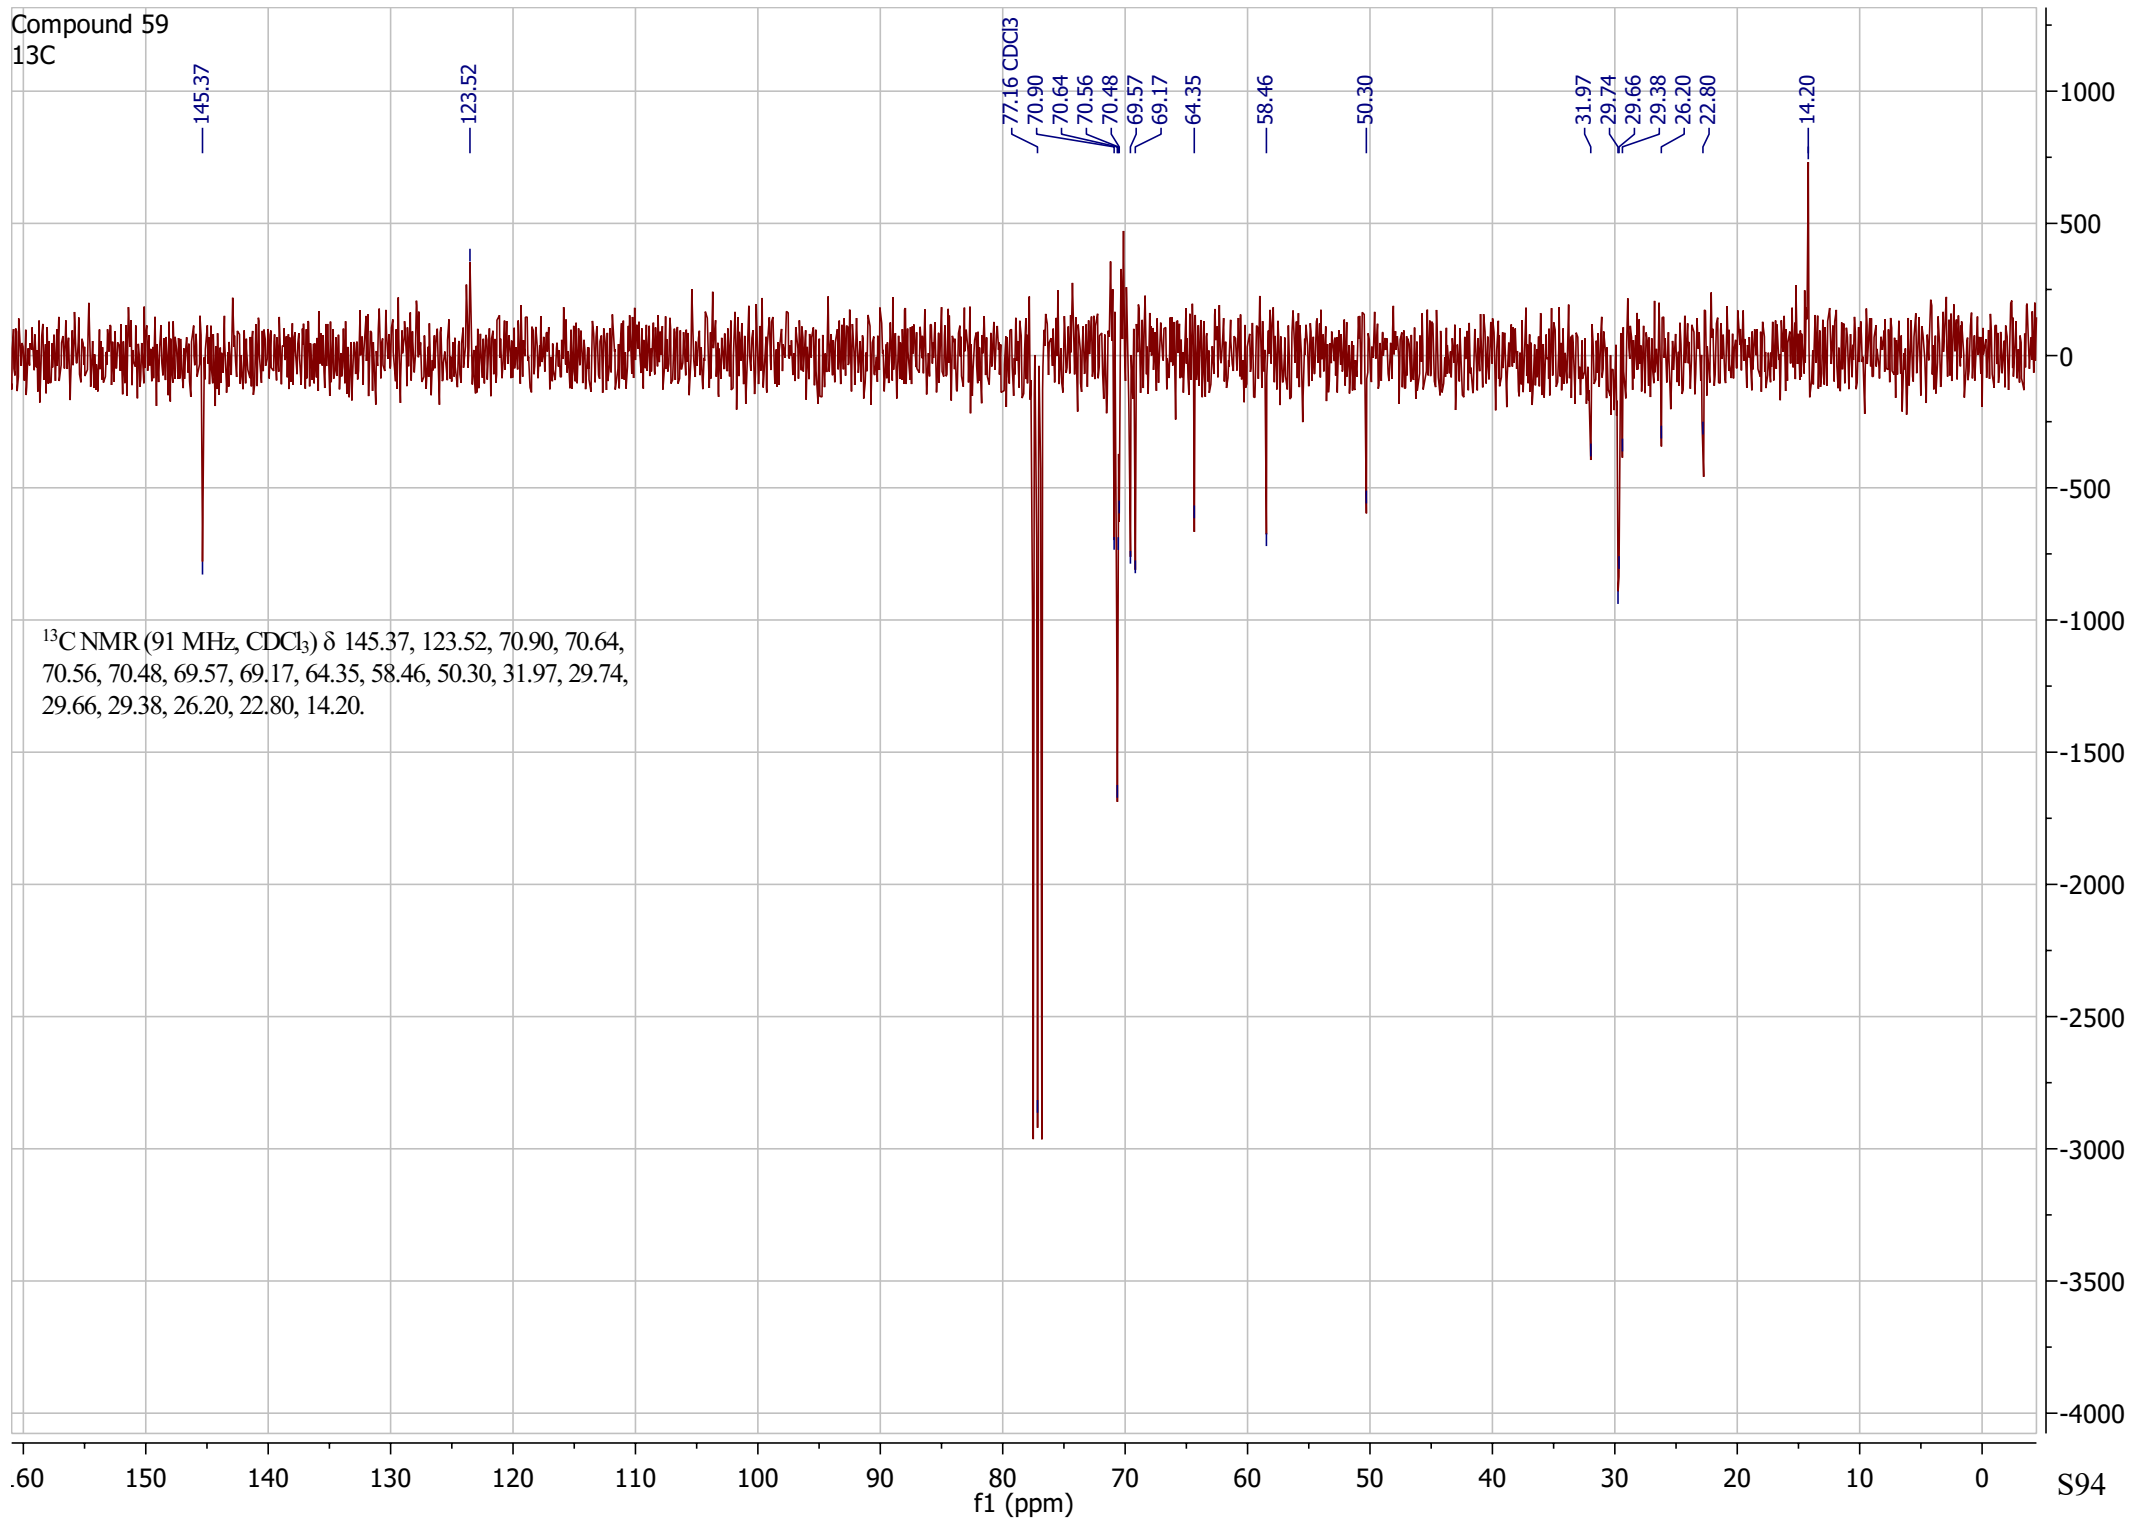

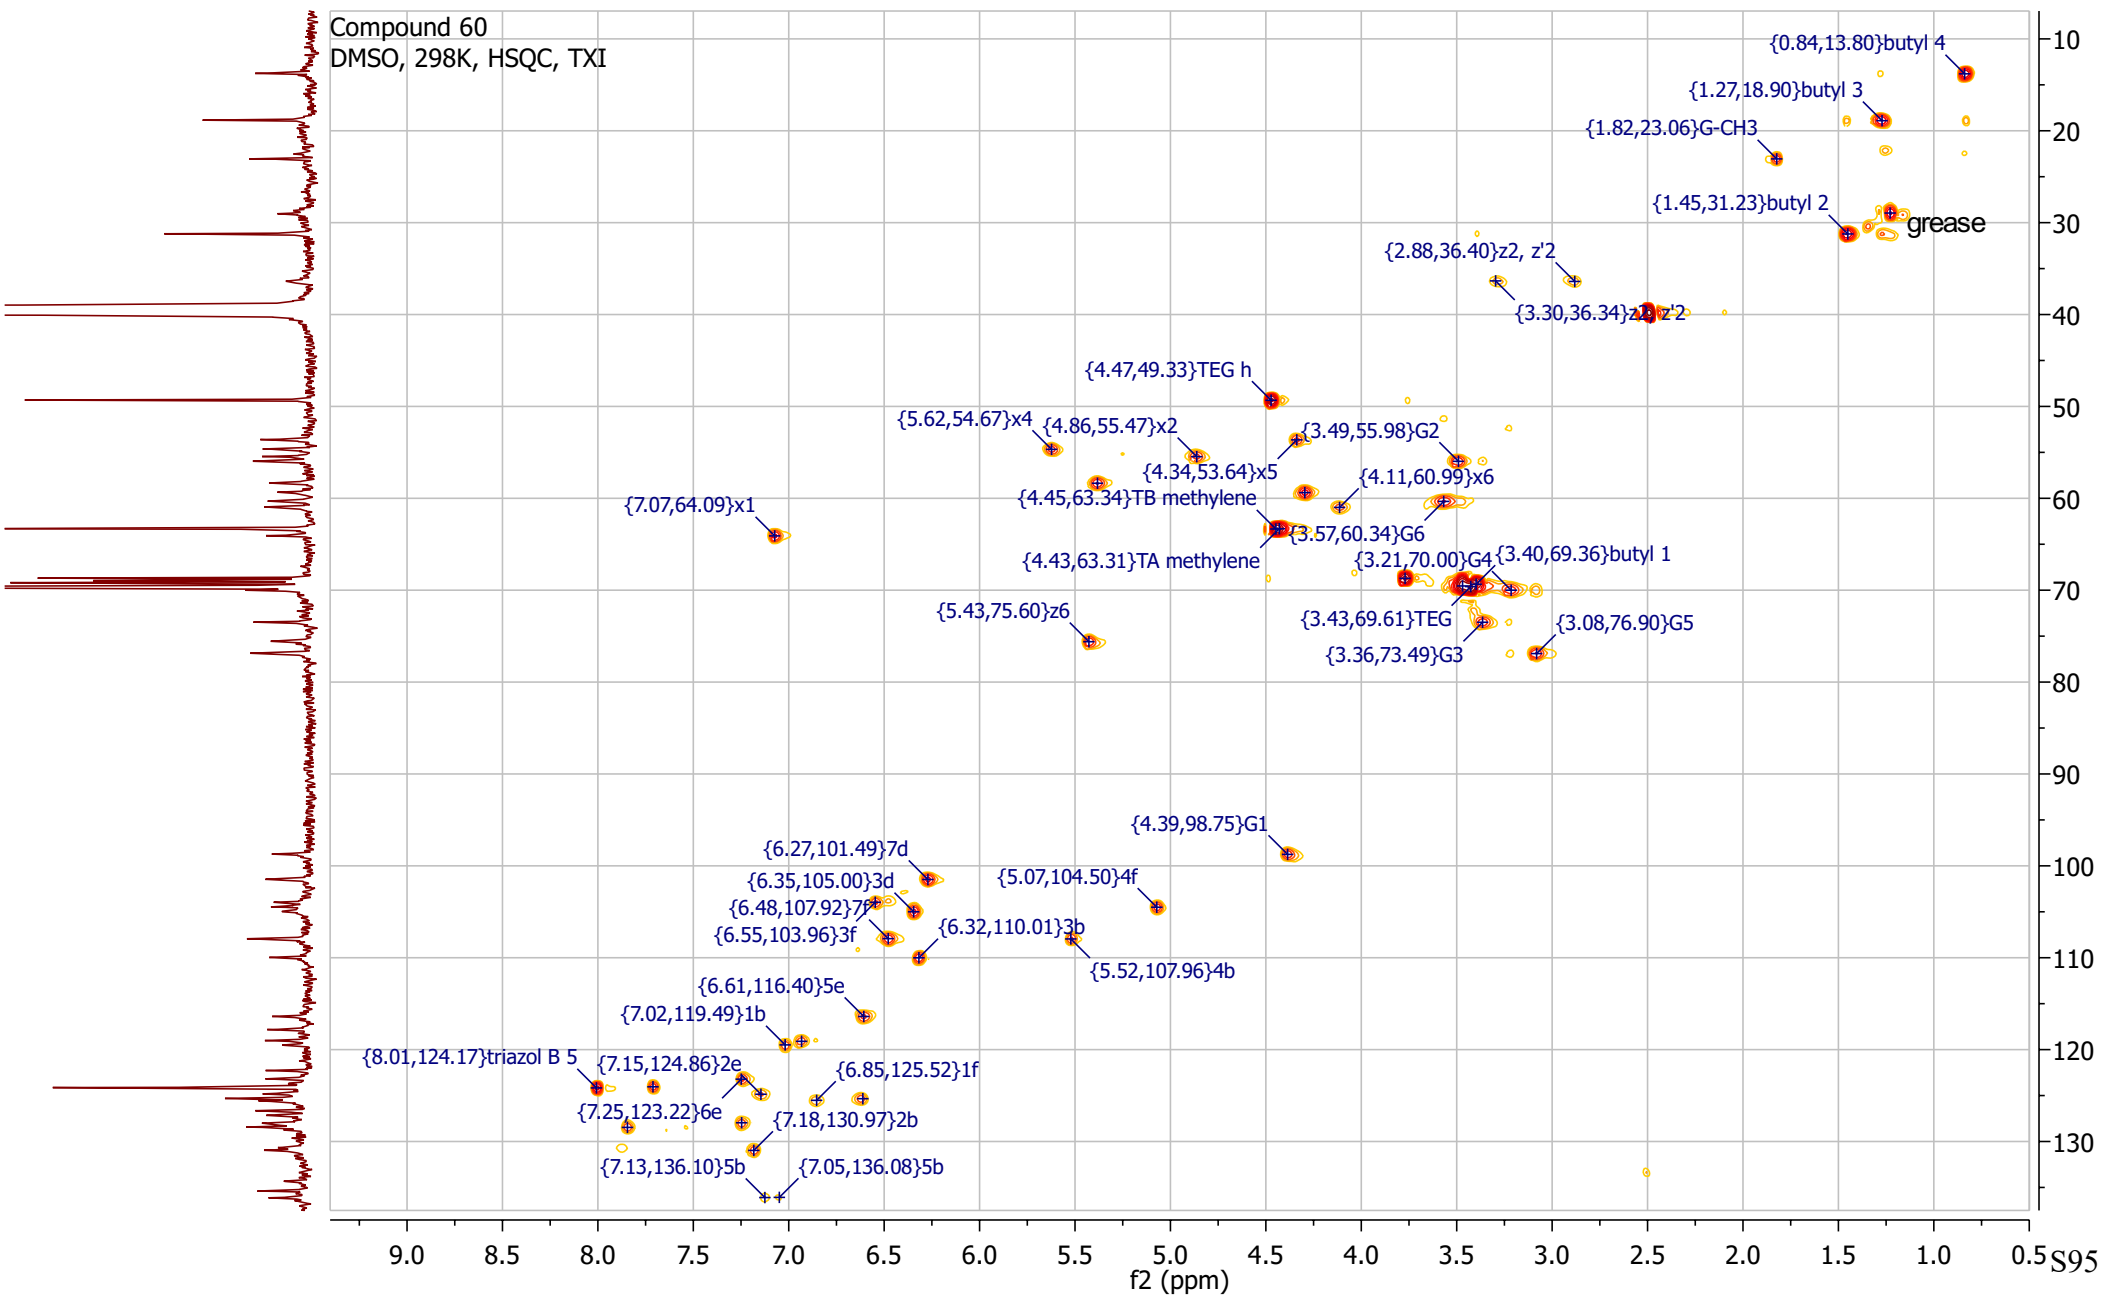

Compound 60  
DMSO, 298K, 13C, TXI

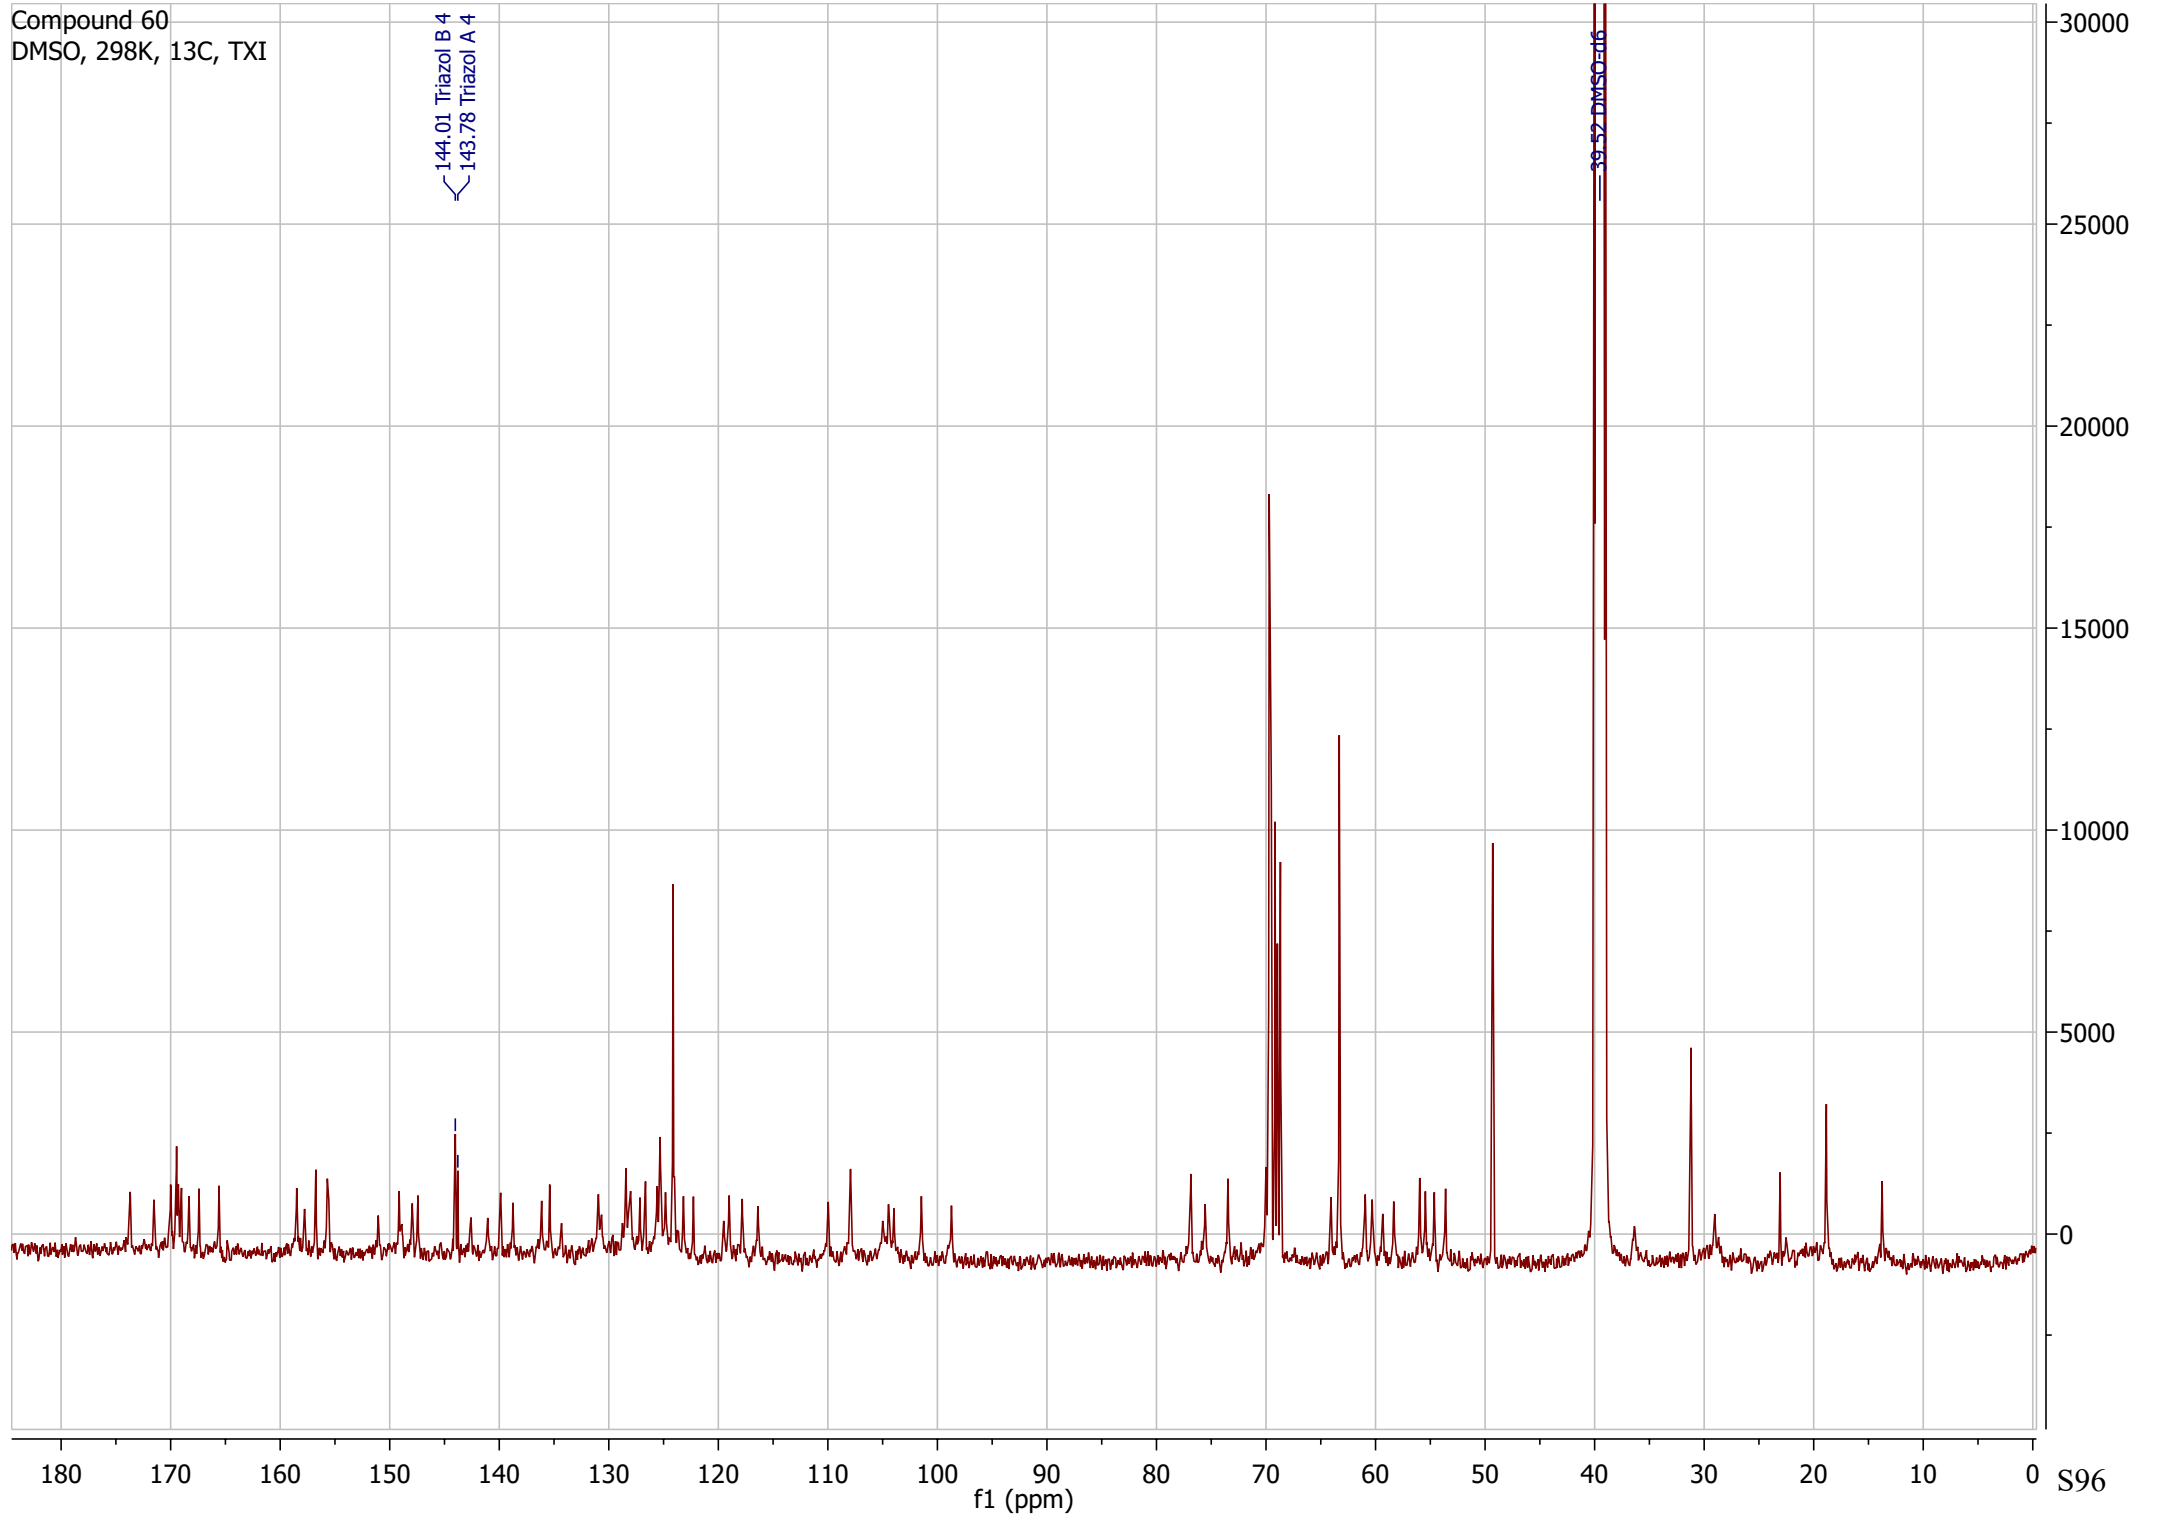

S96

Compound 61  
DMSO, 298K, HSQC, TXI

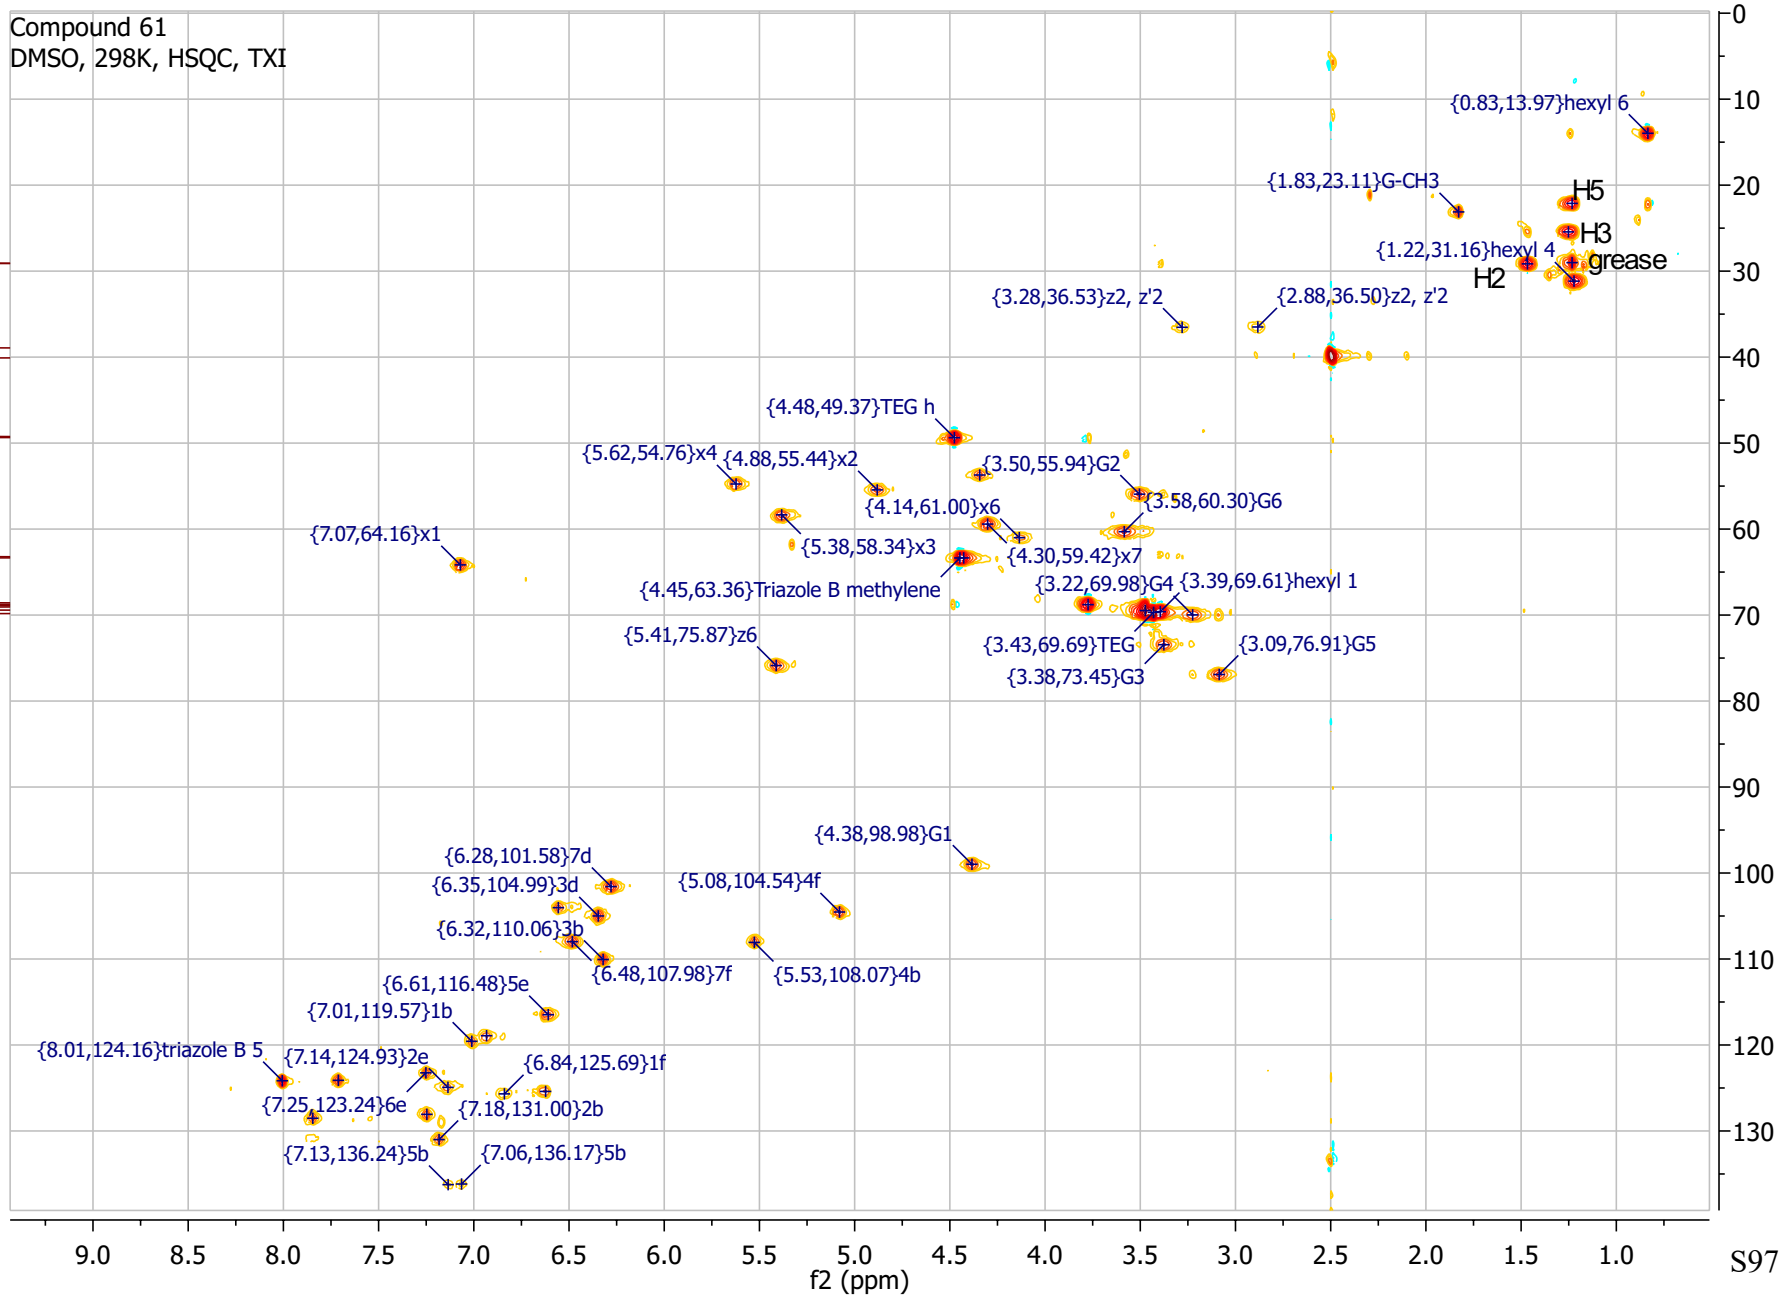

f1 (ppm)

S97

Compound 61  
DMSO, 298K, 13C, TXI

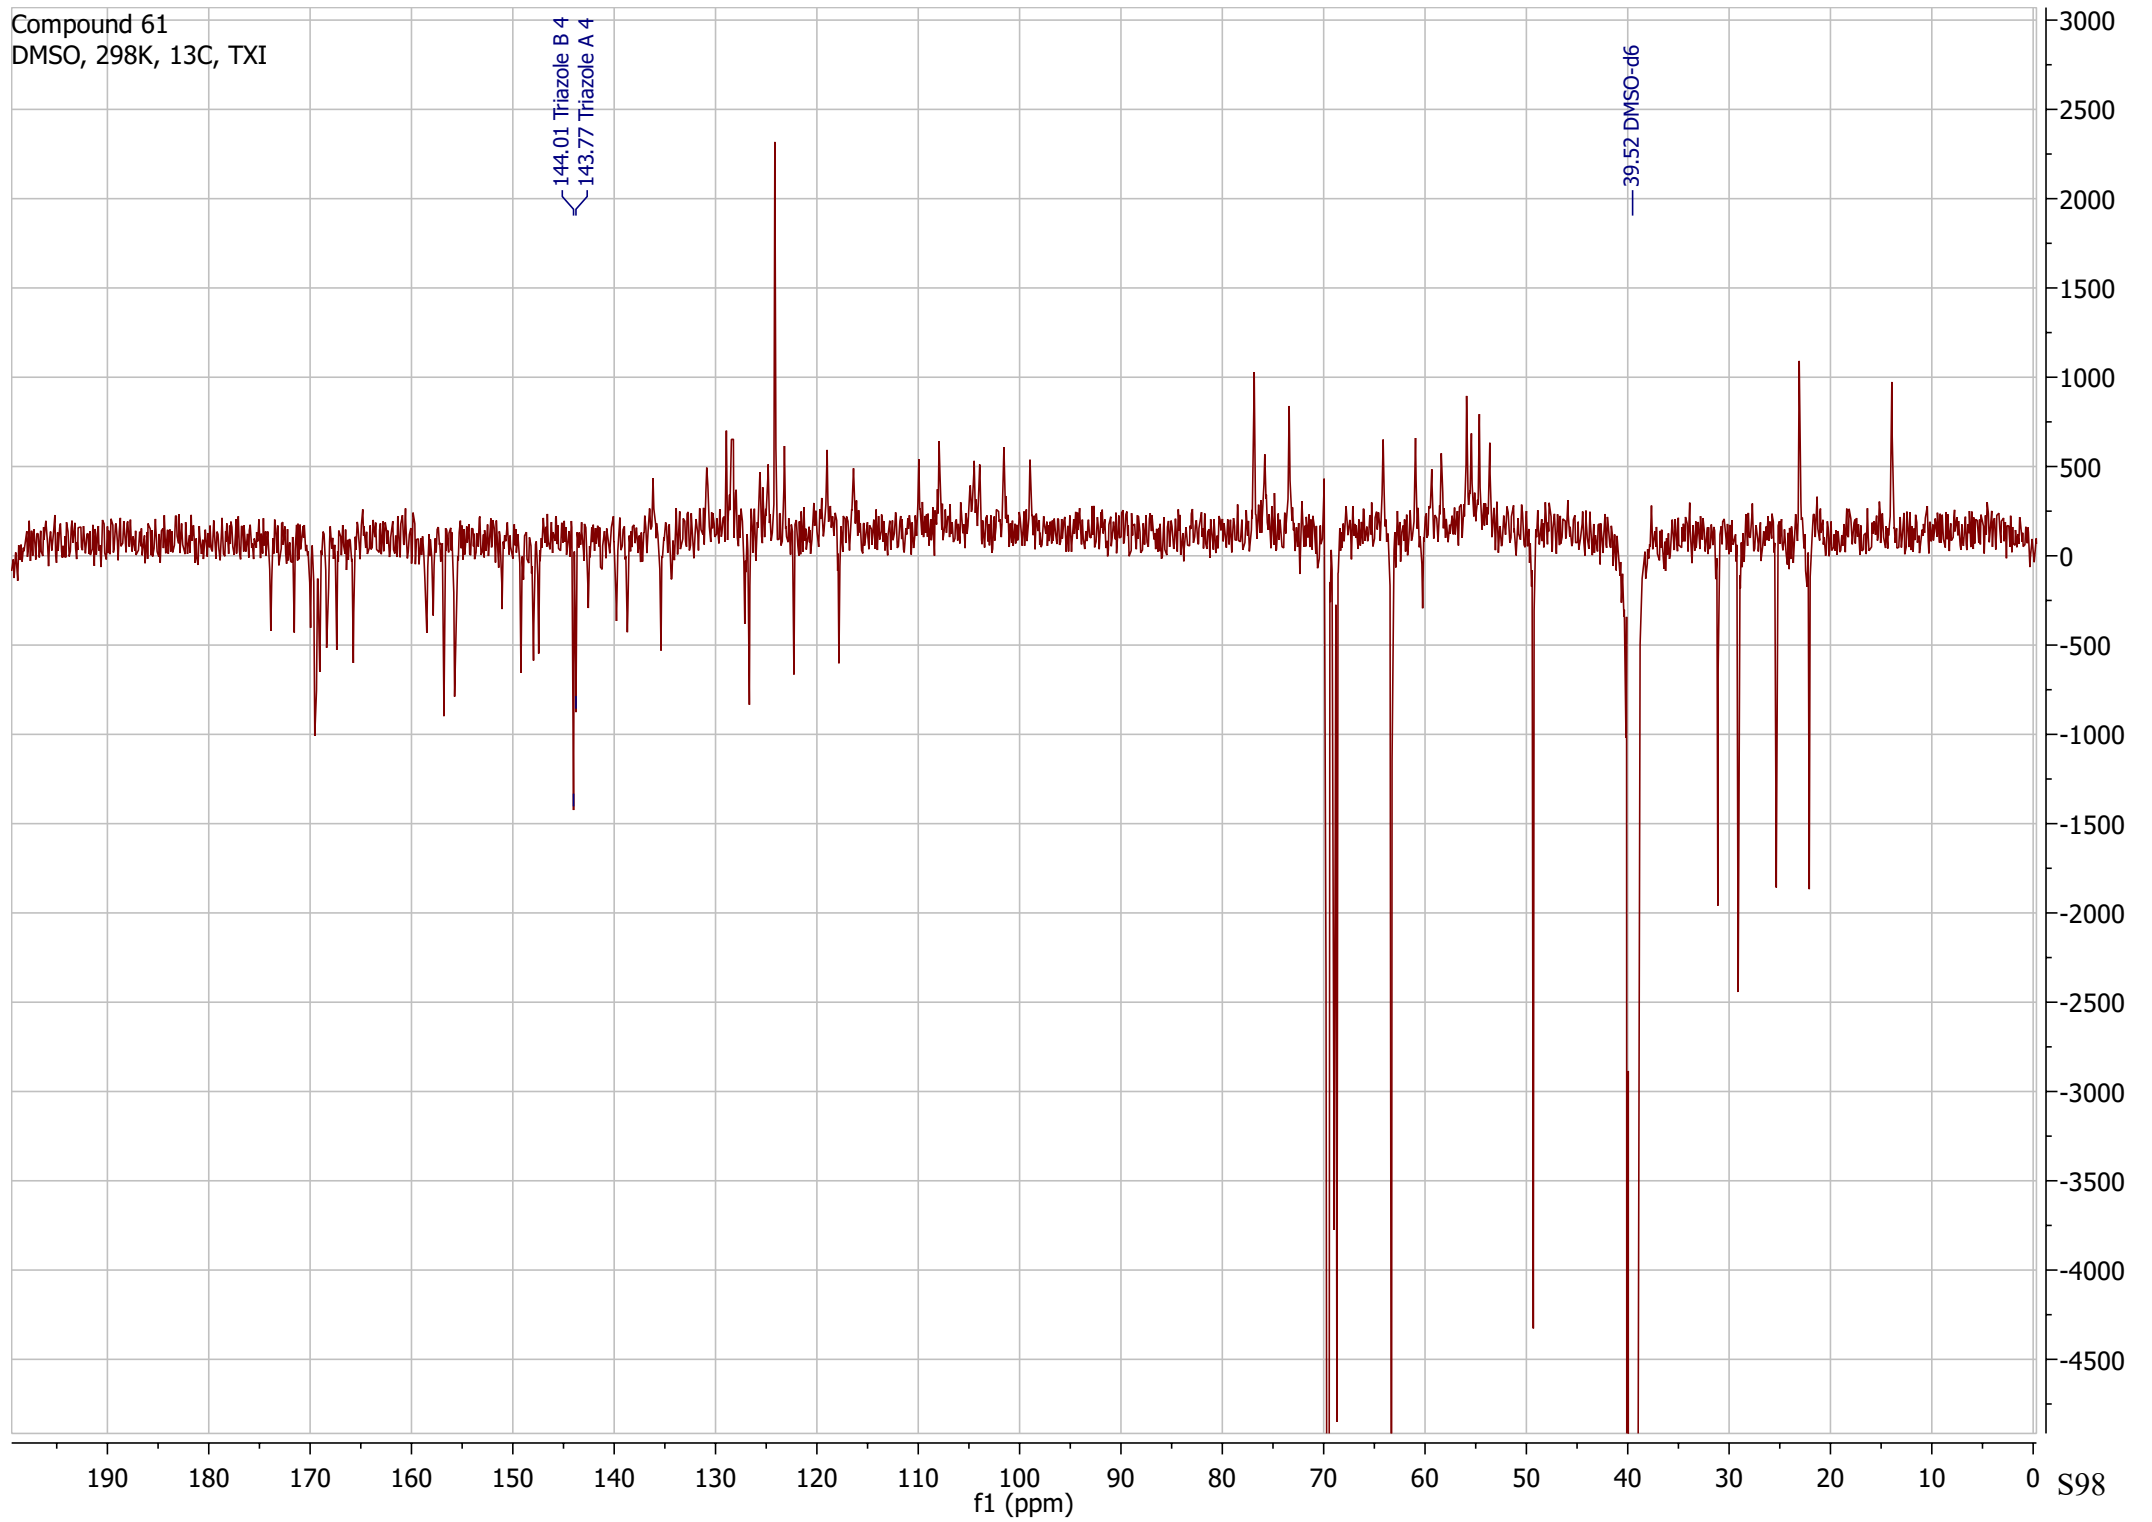

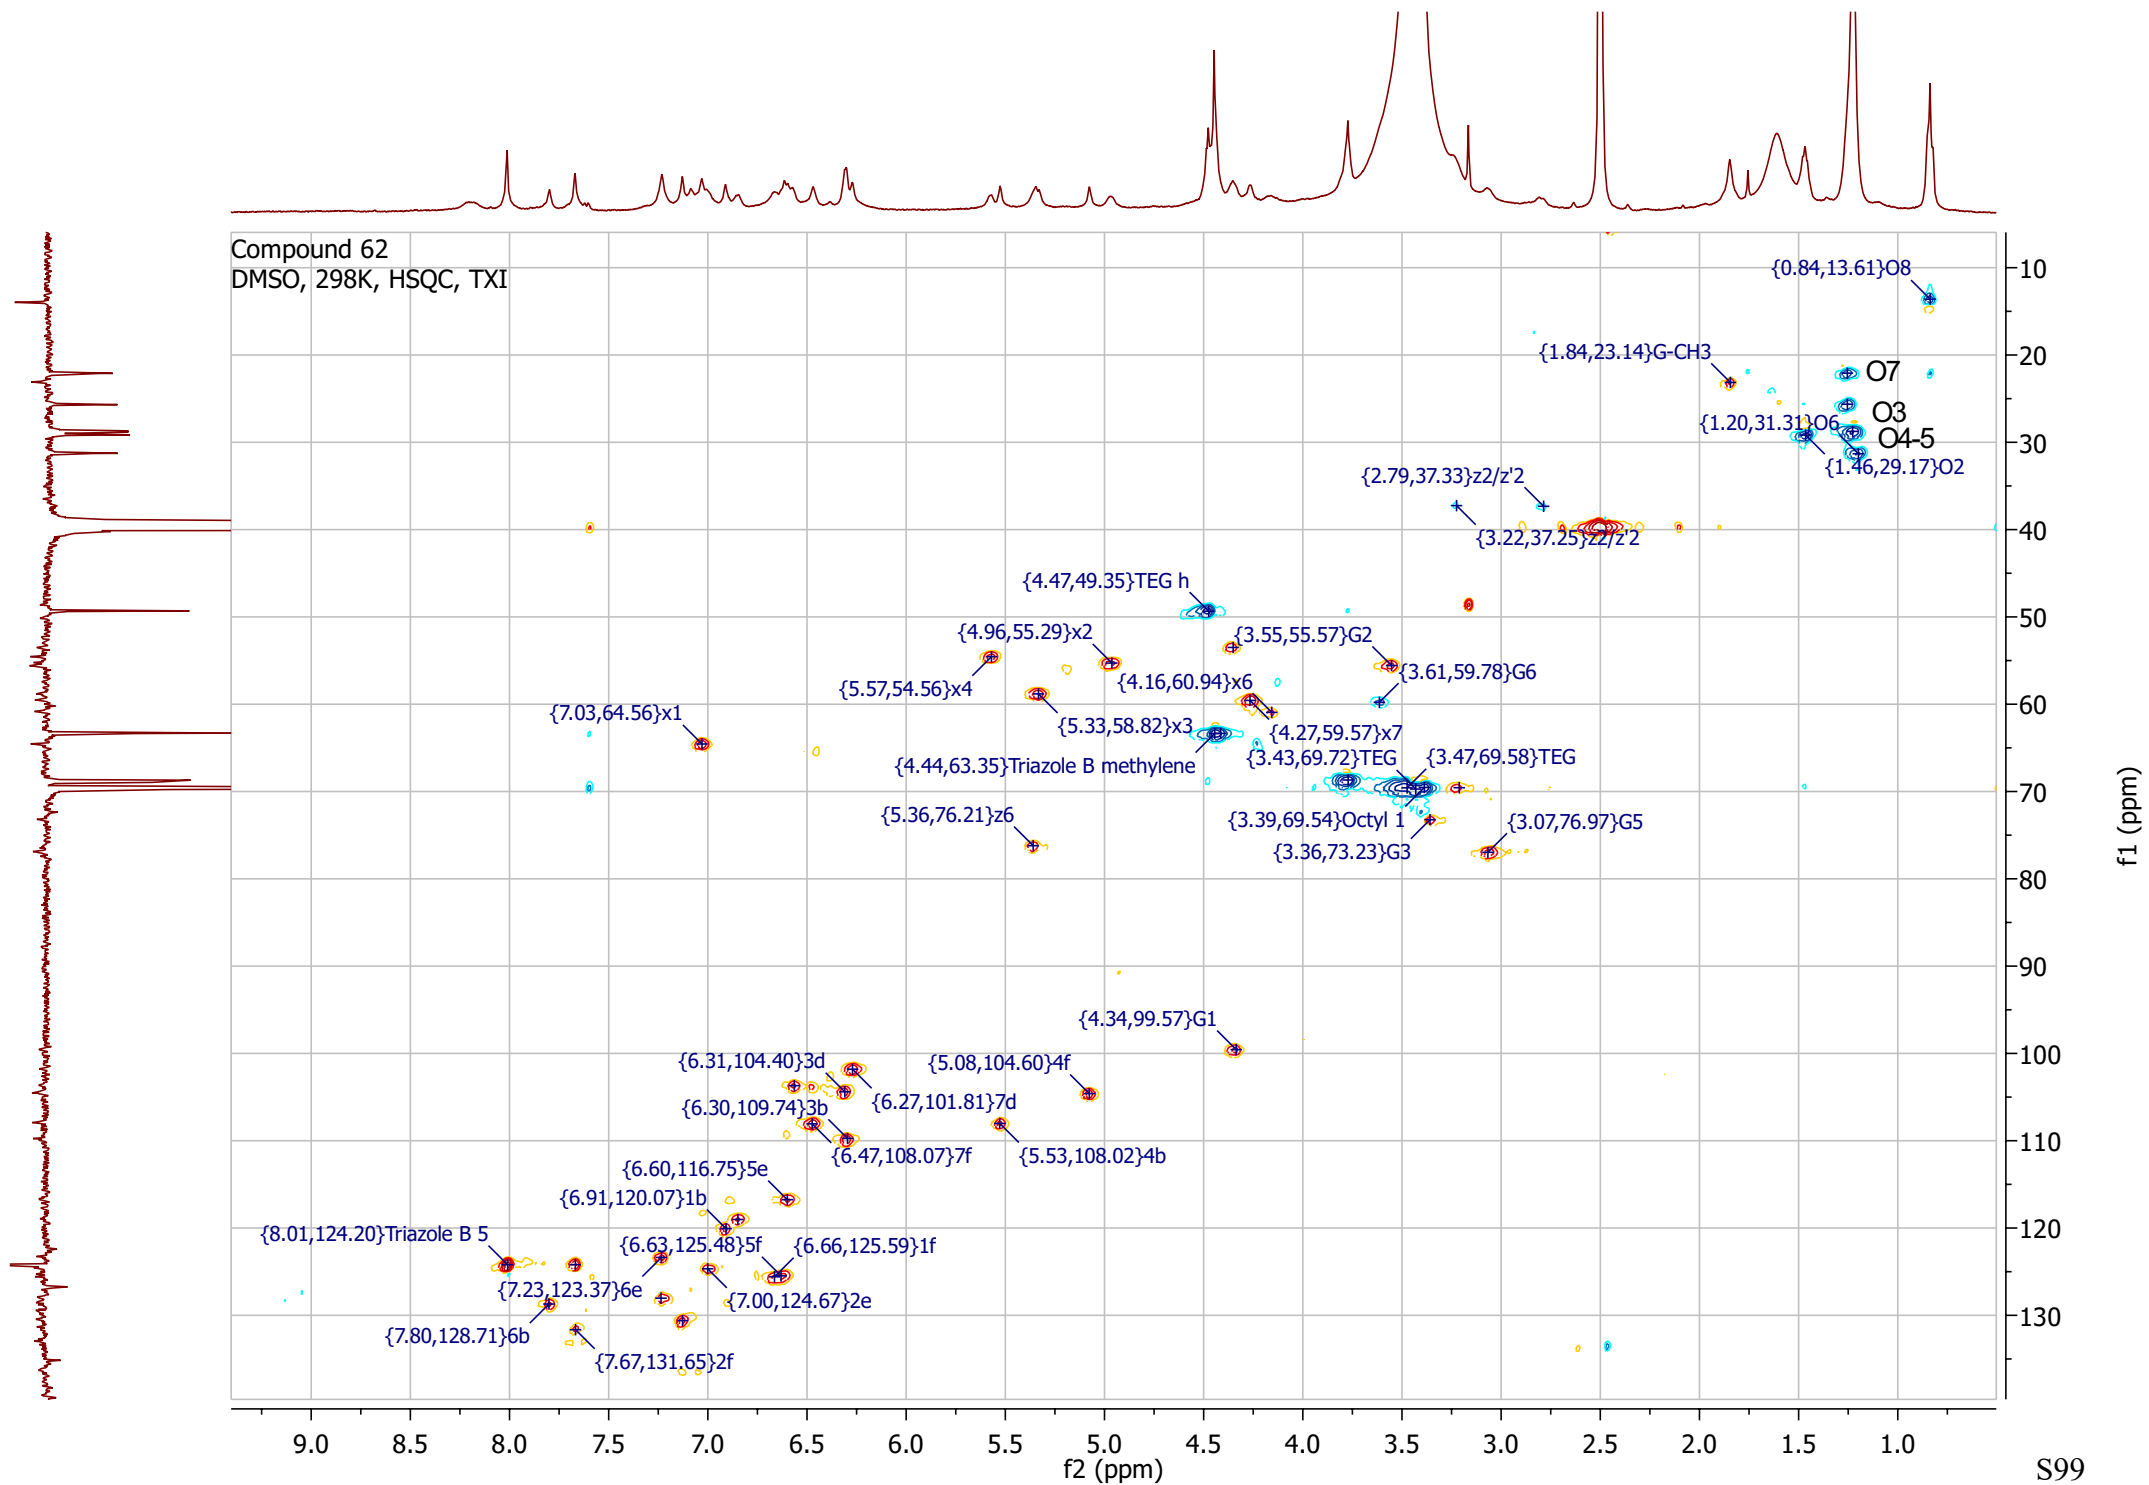

Compound 62  
DMSO, 298K, 13C, DUAL

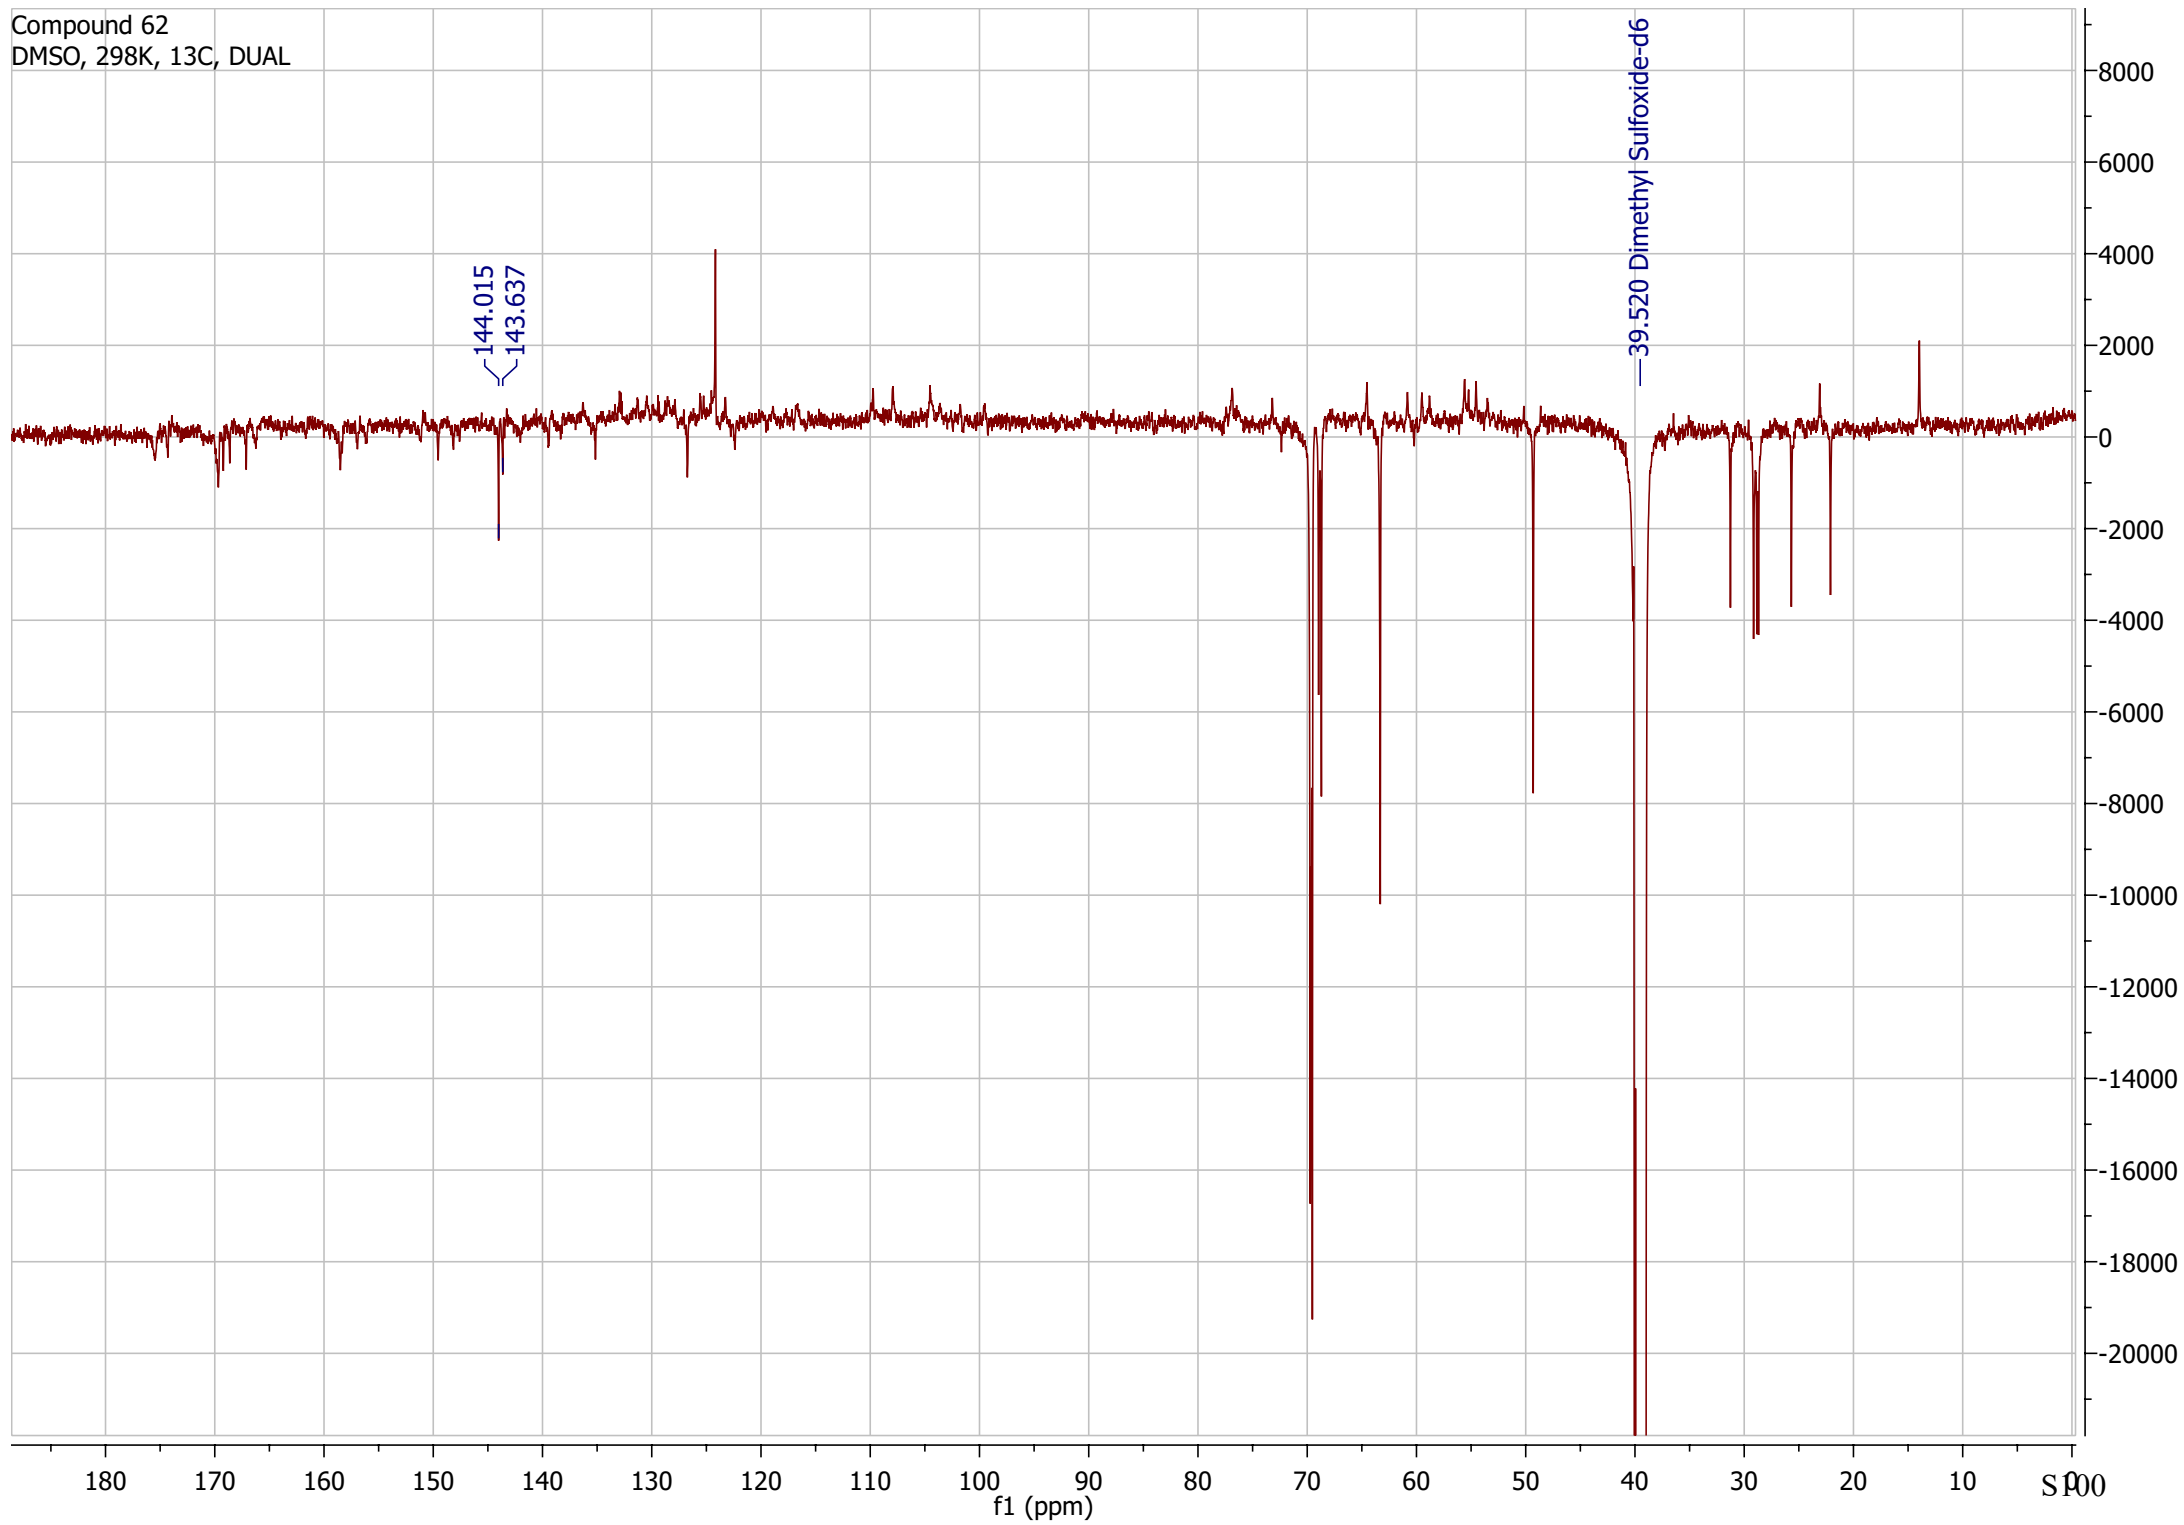



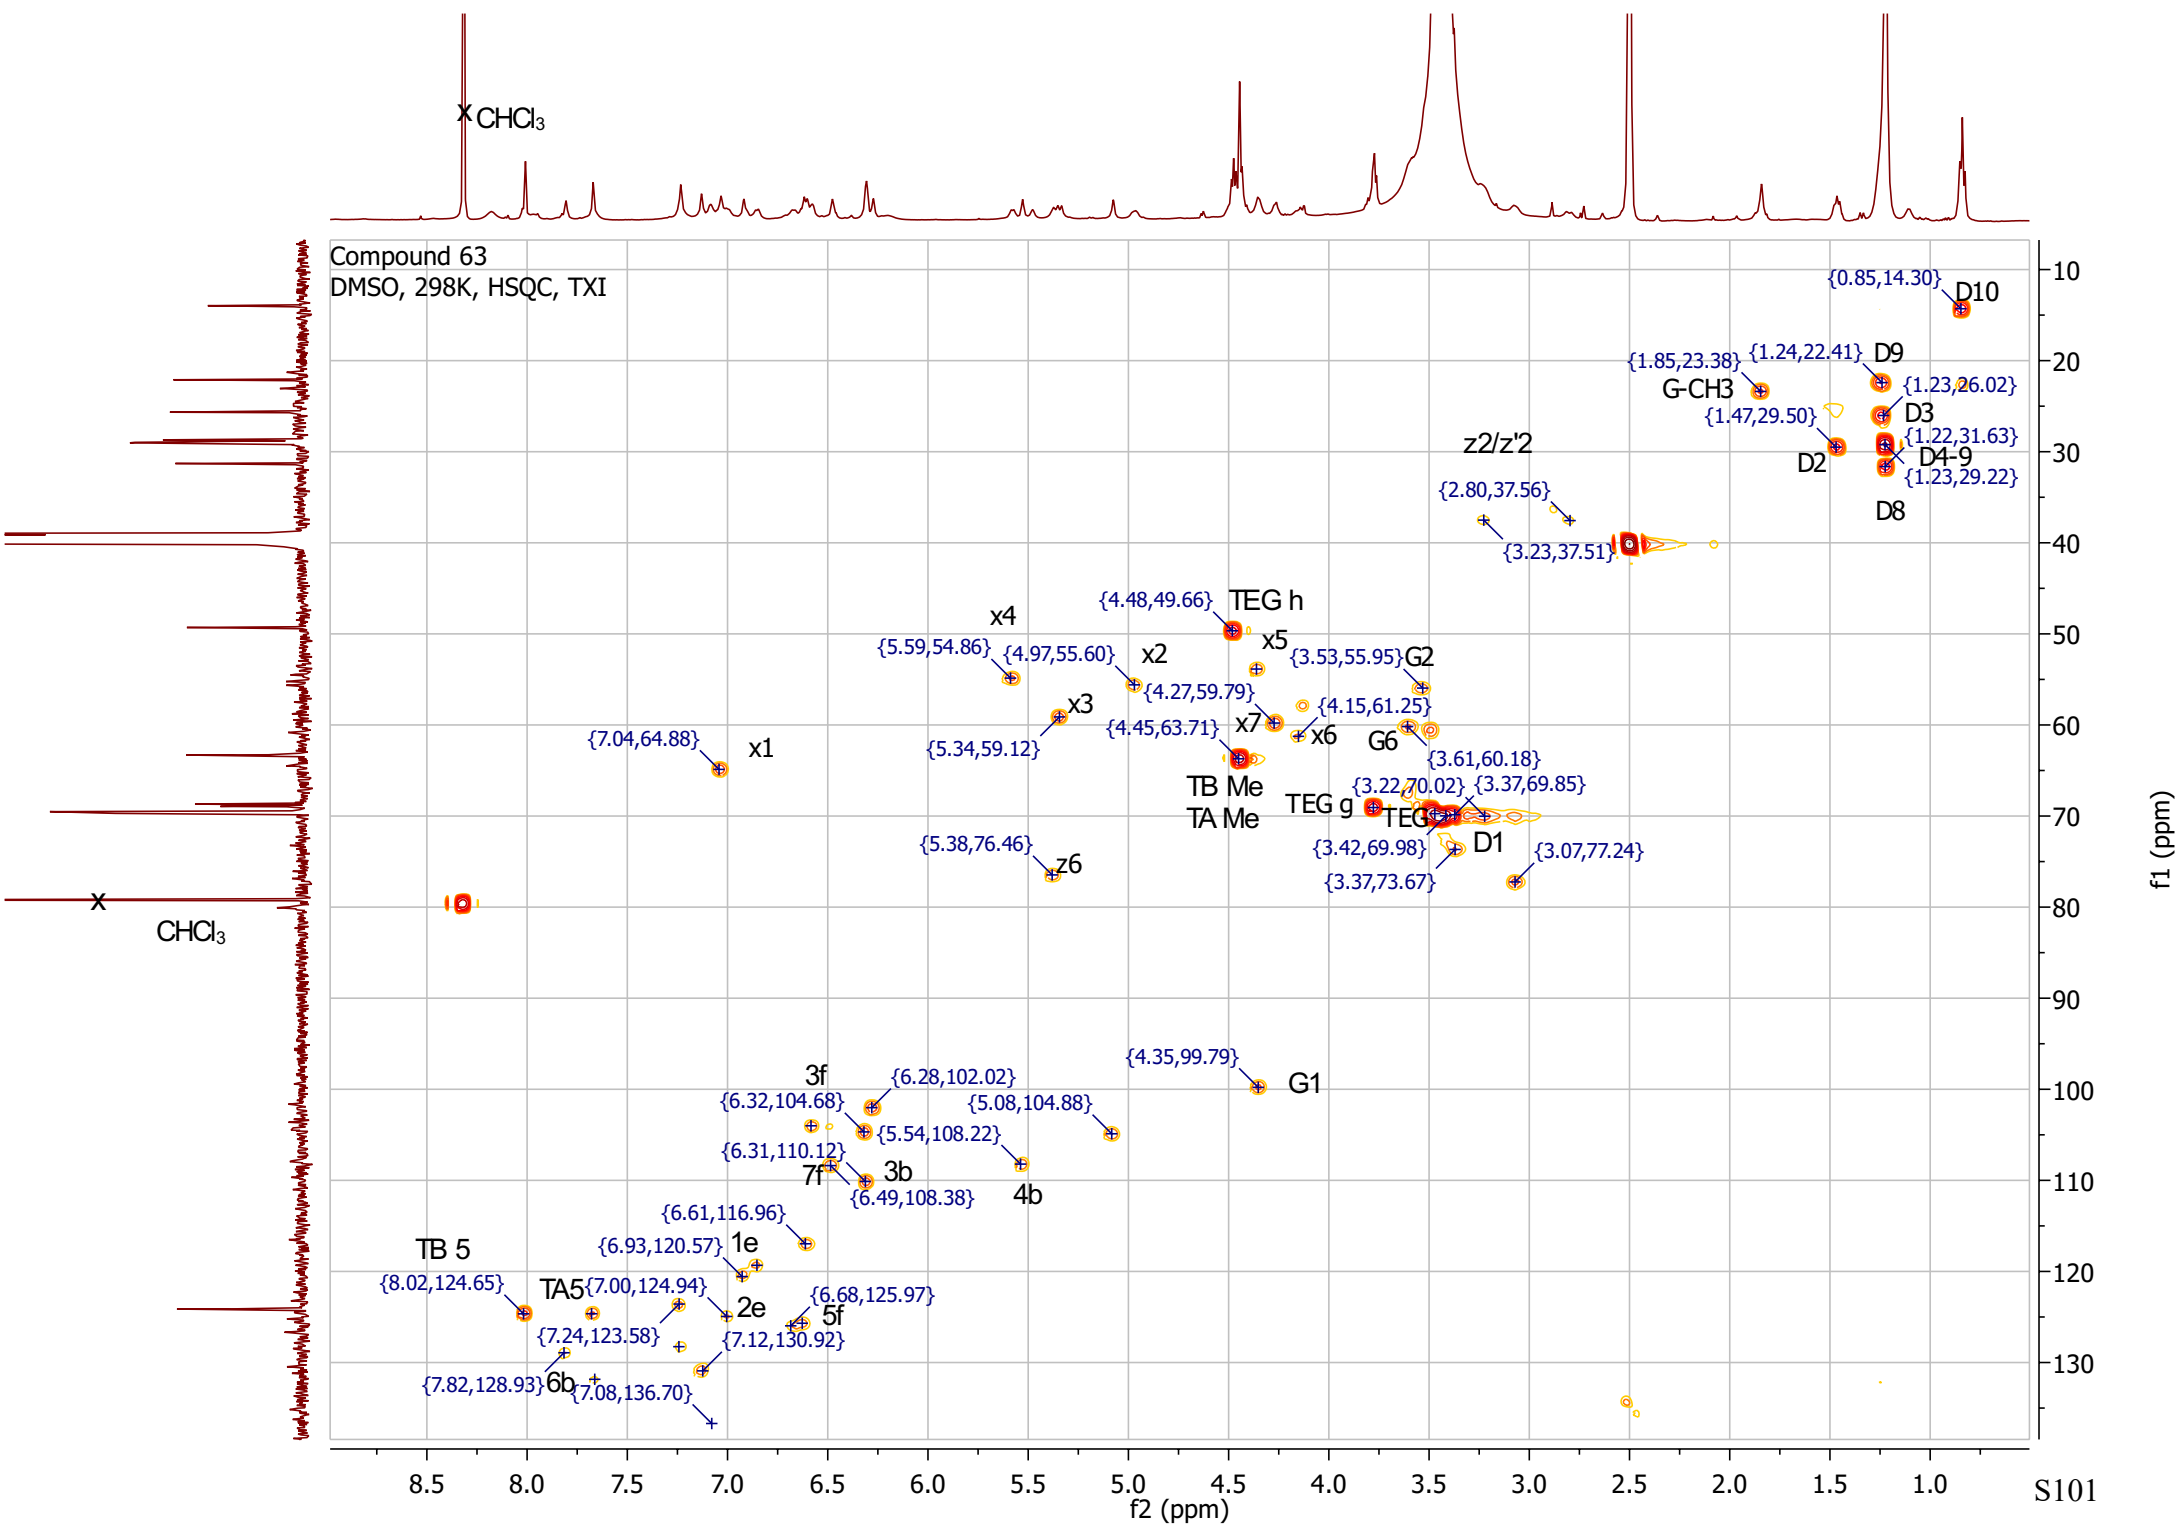

Compound 63  
DMSO, 13C, TXI

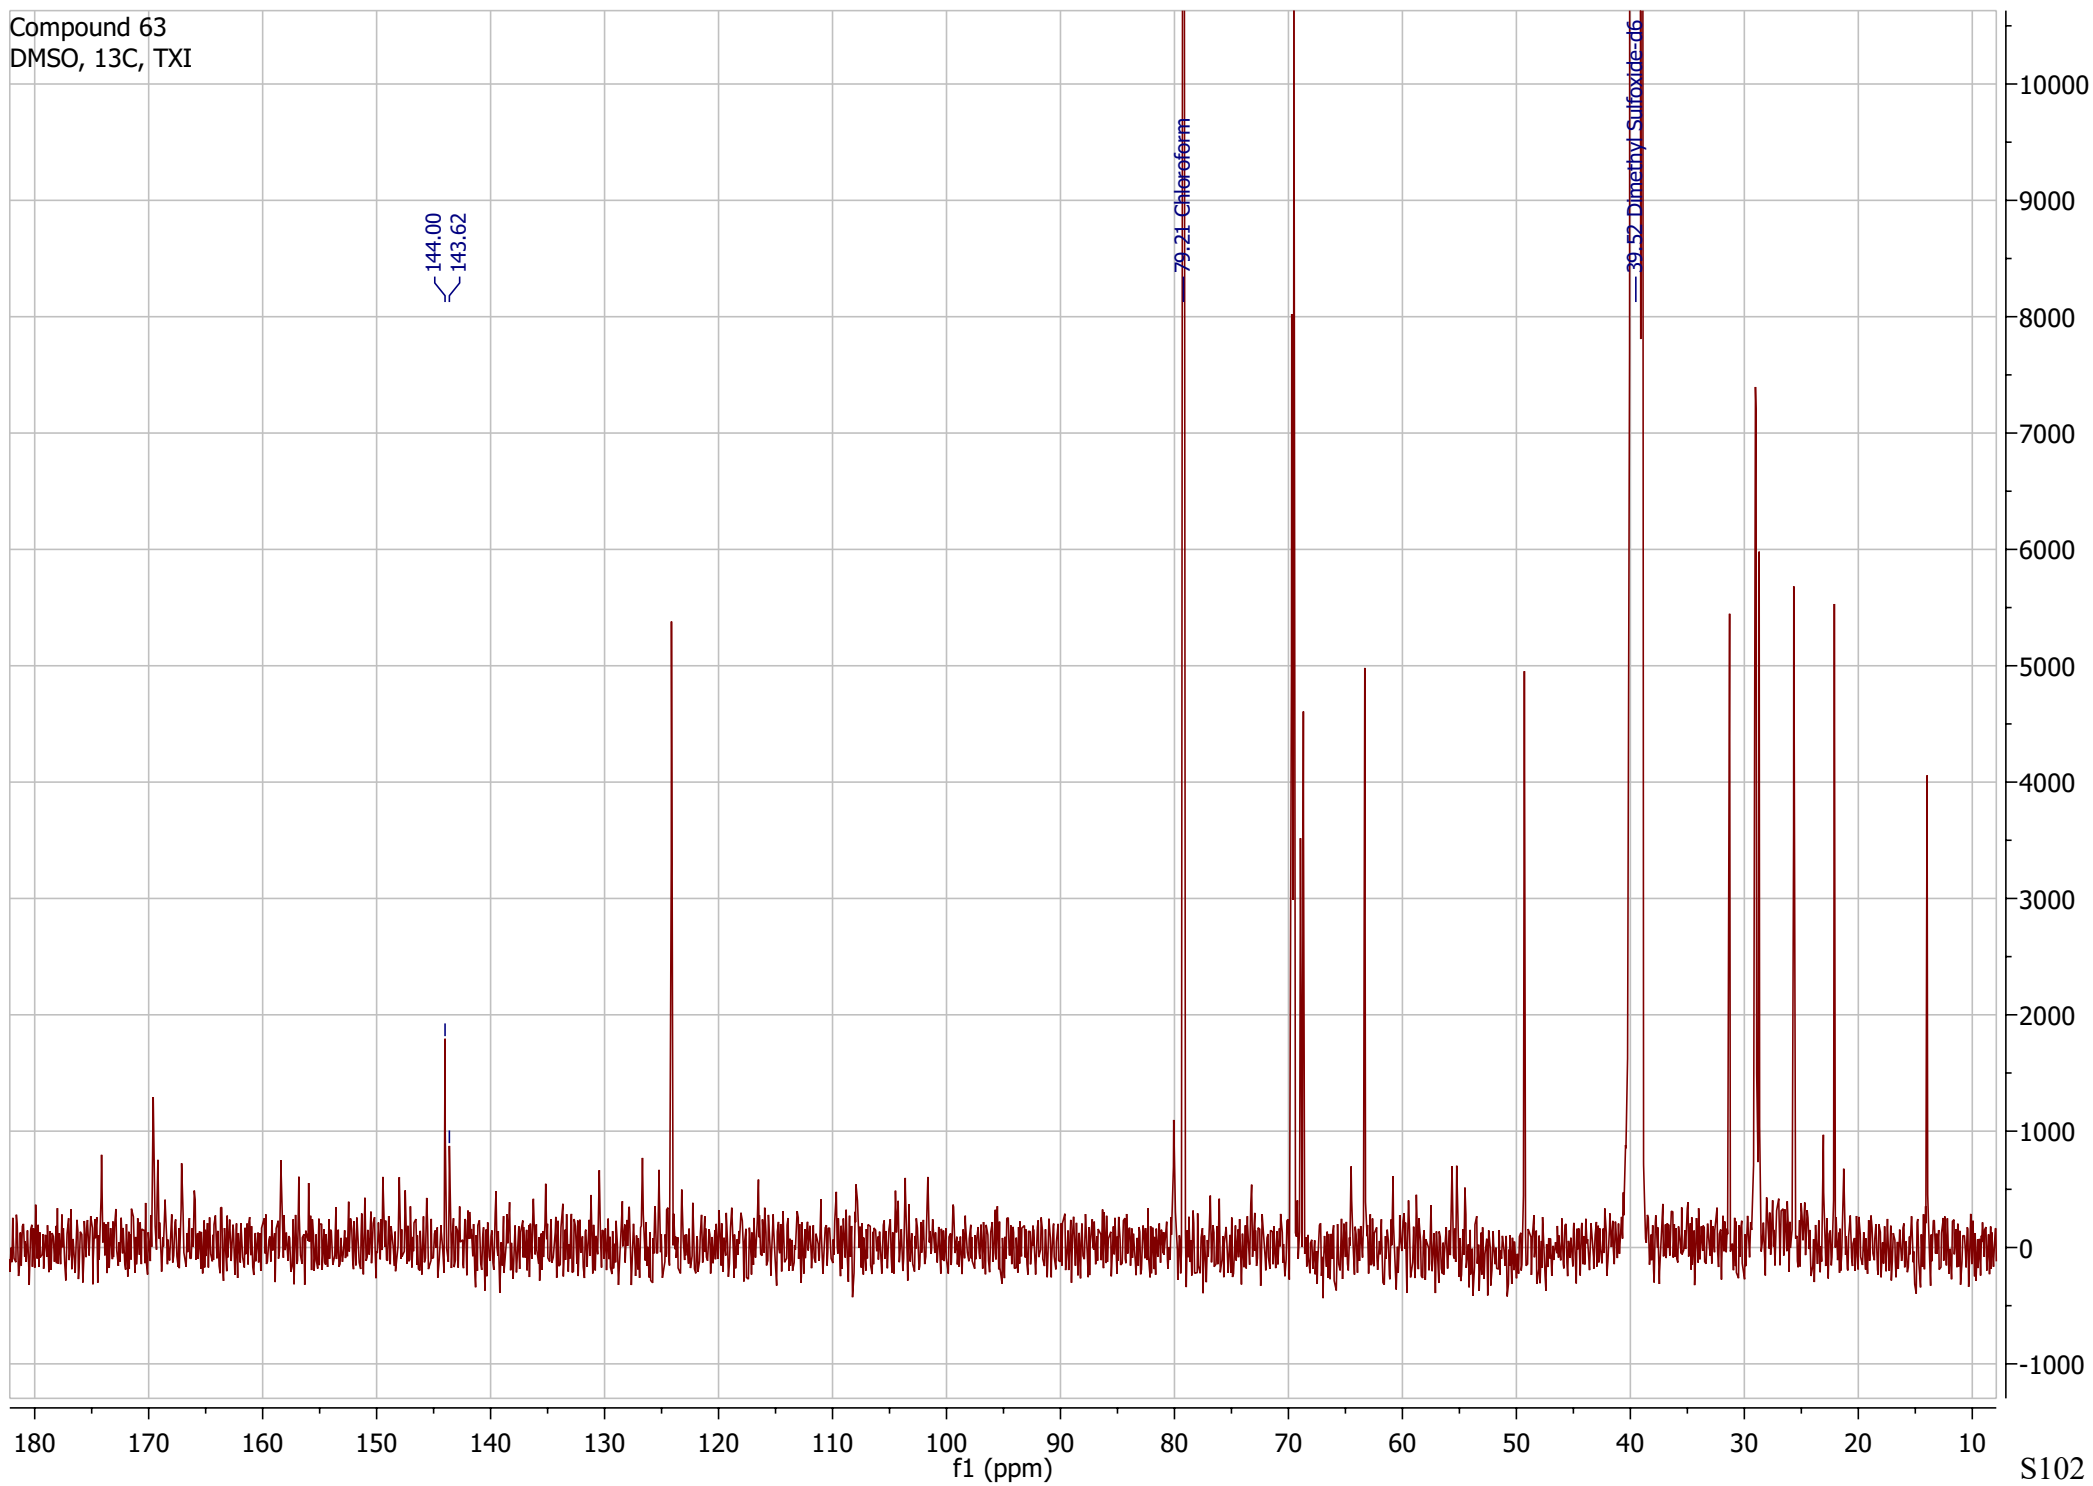

S102

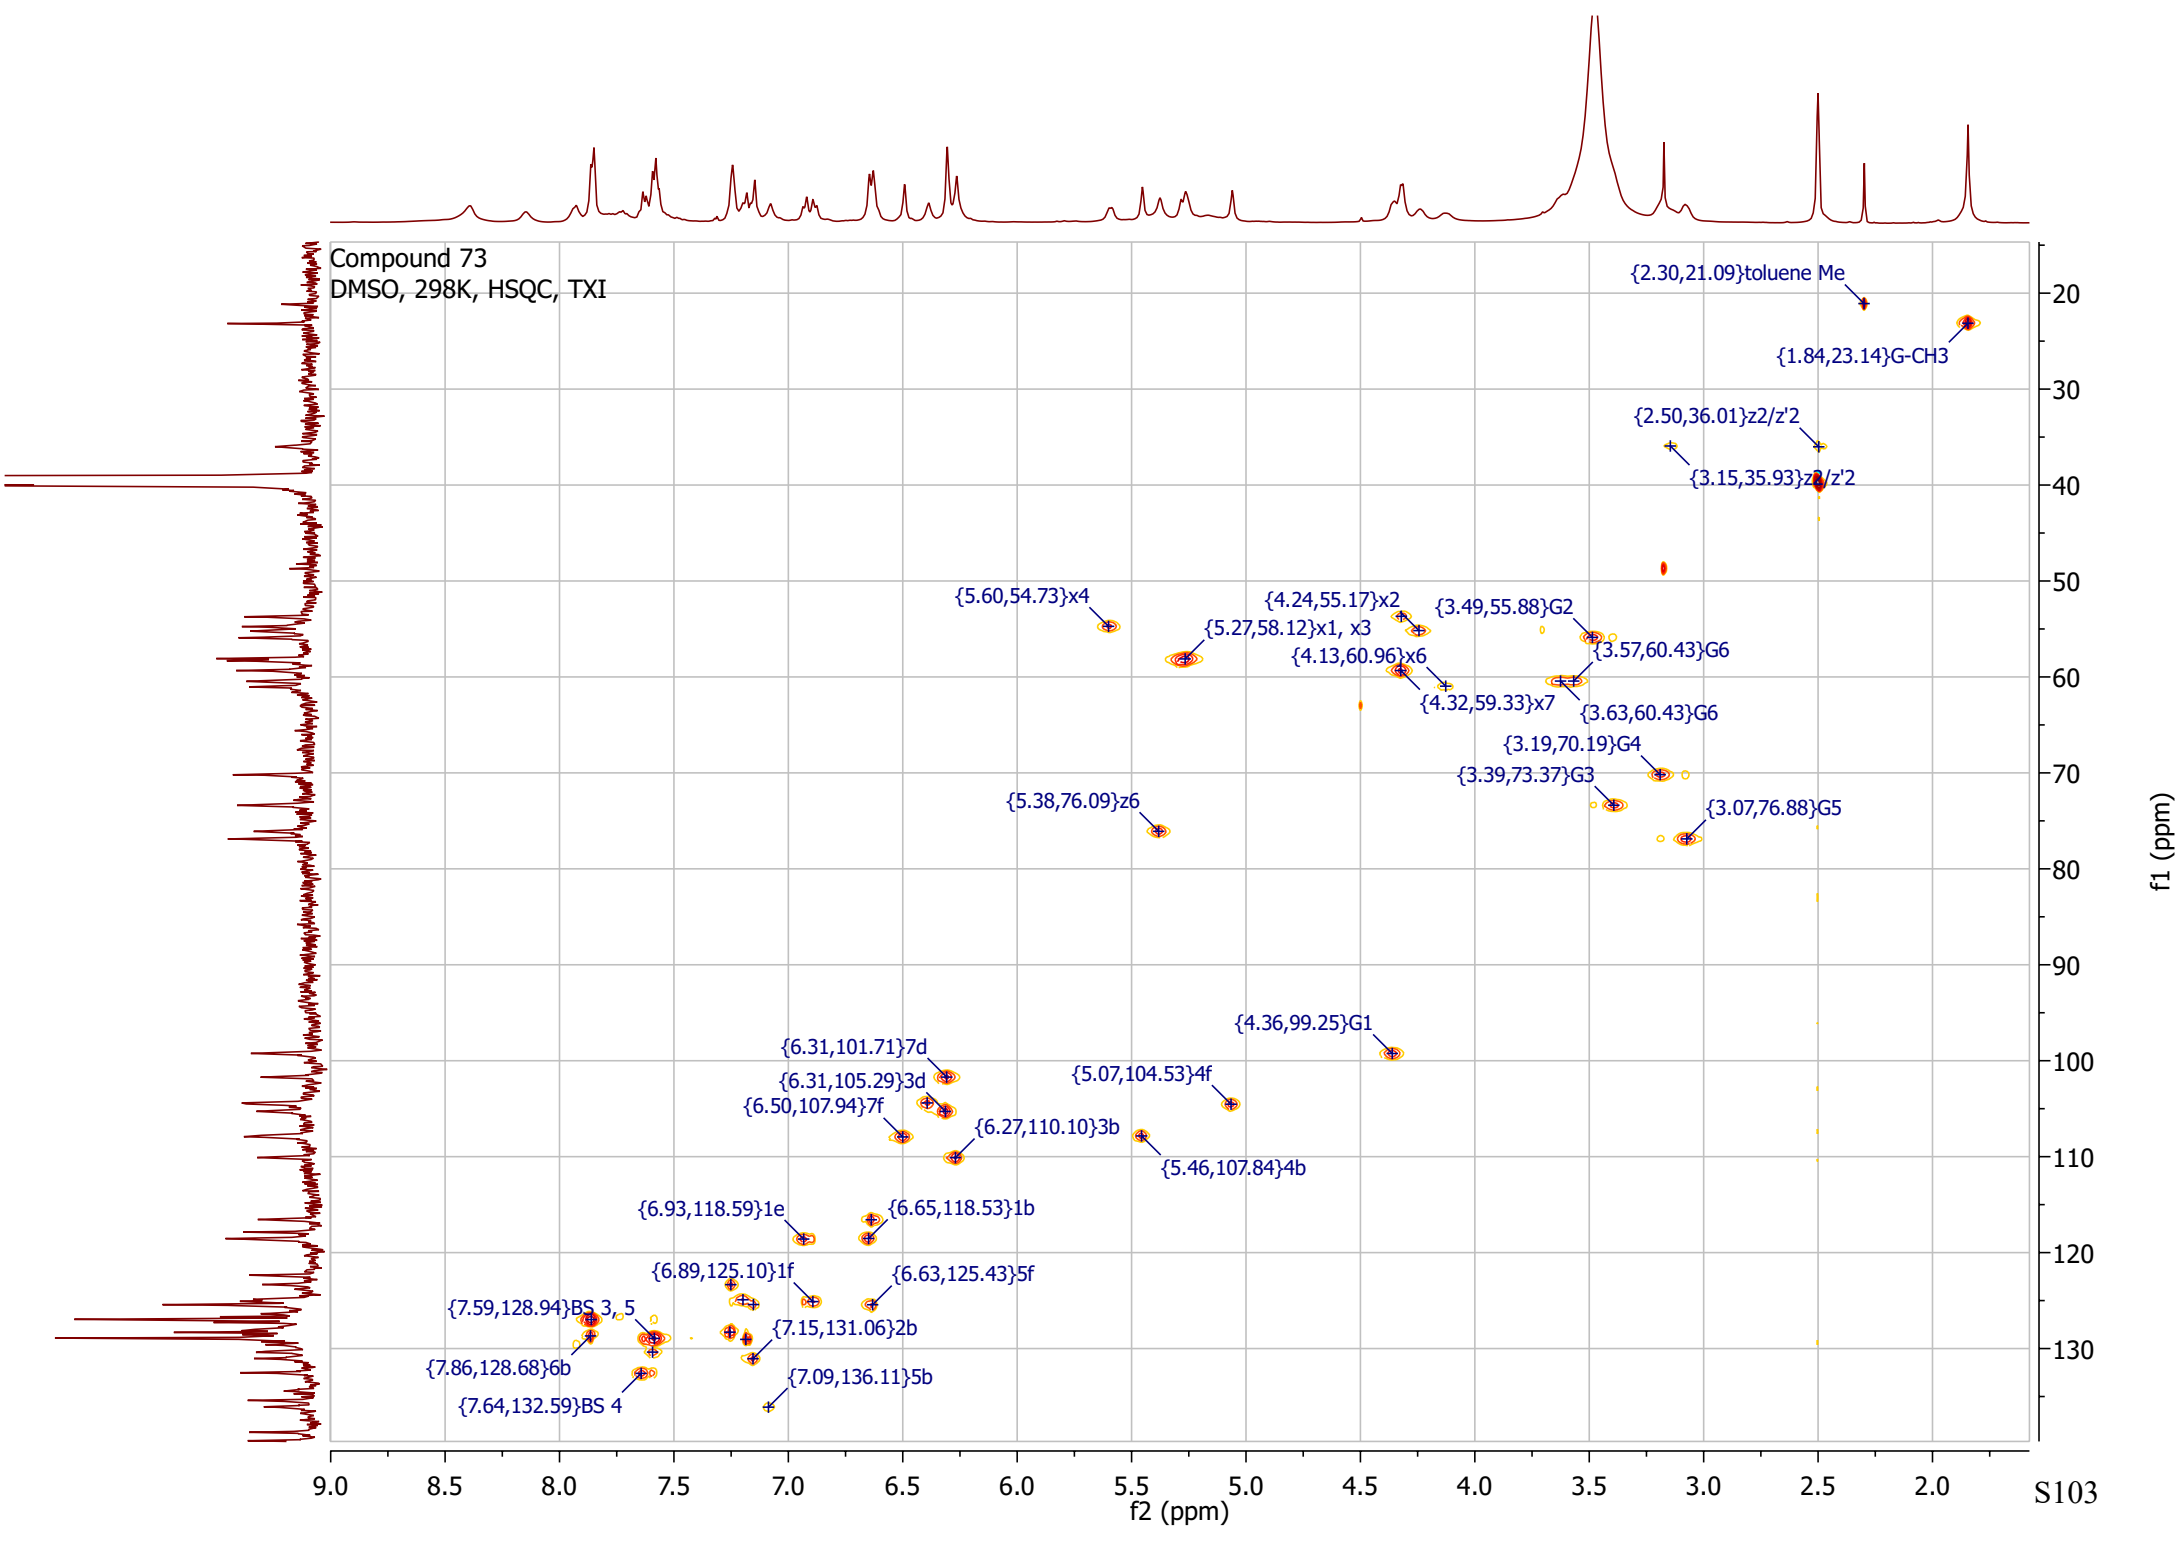

Compound 73  
DMSO, 298K, 13C, TXI

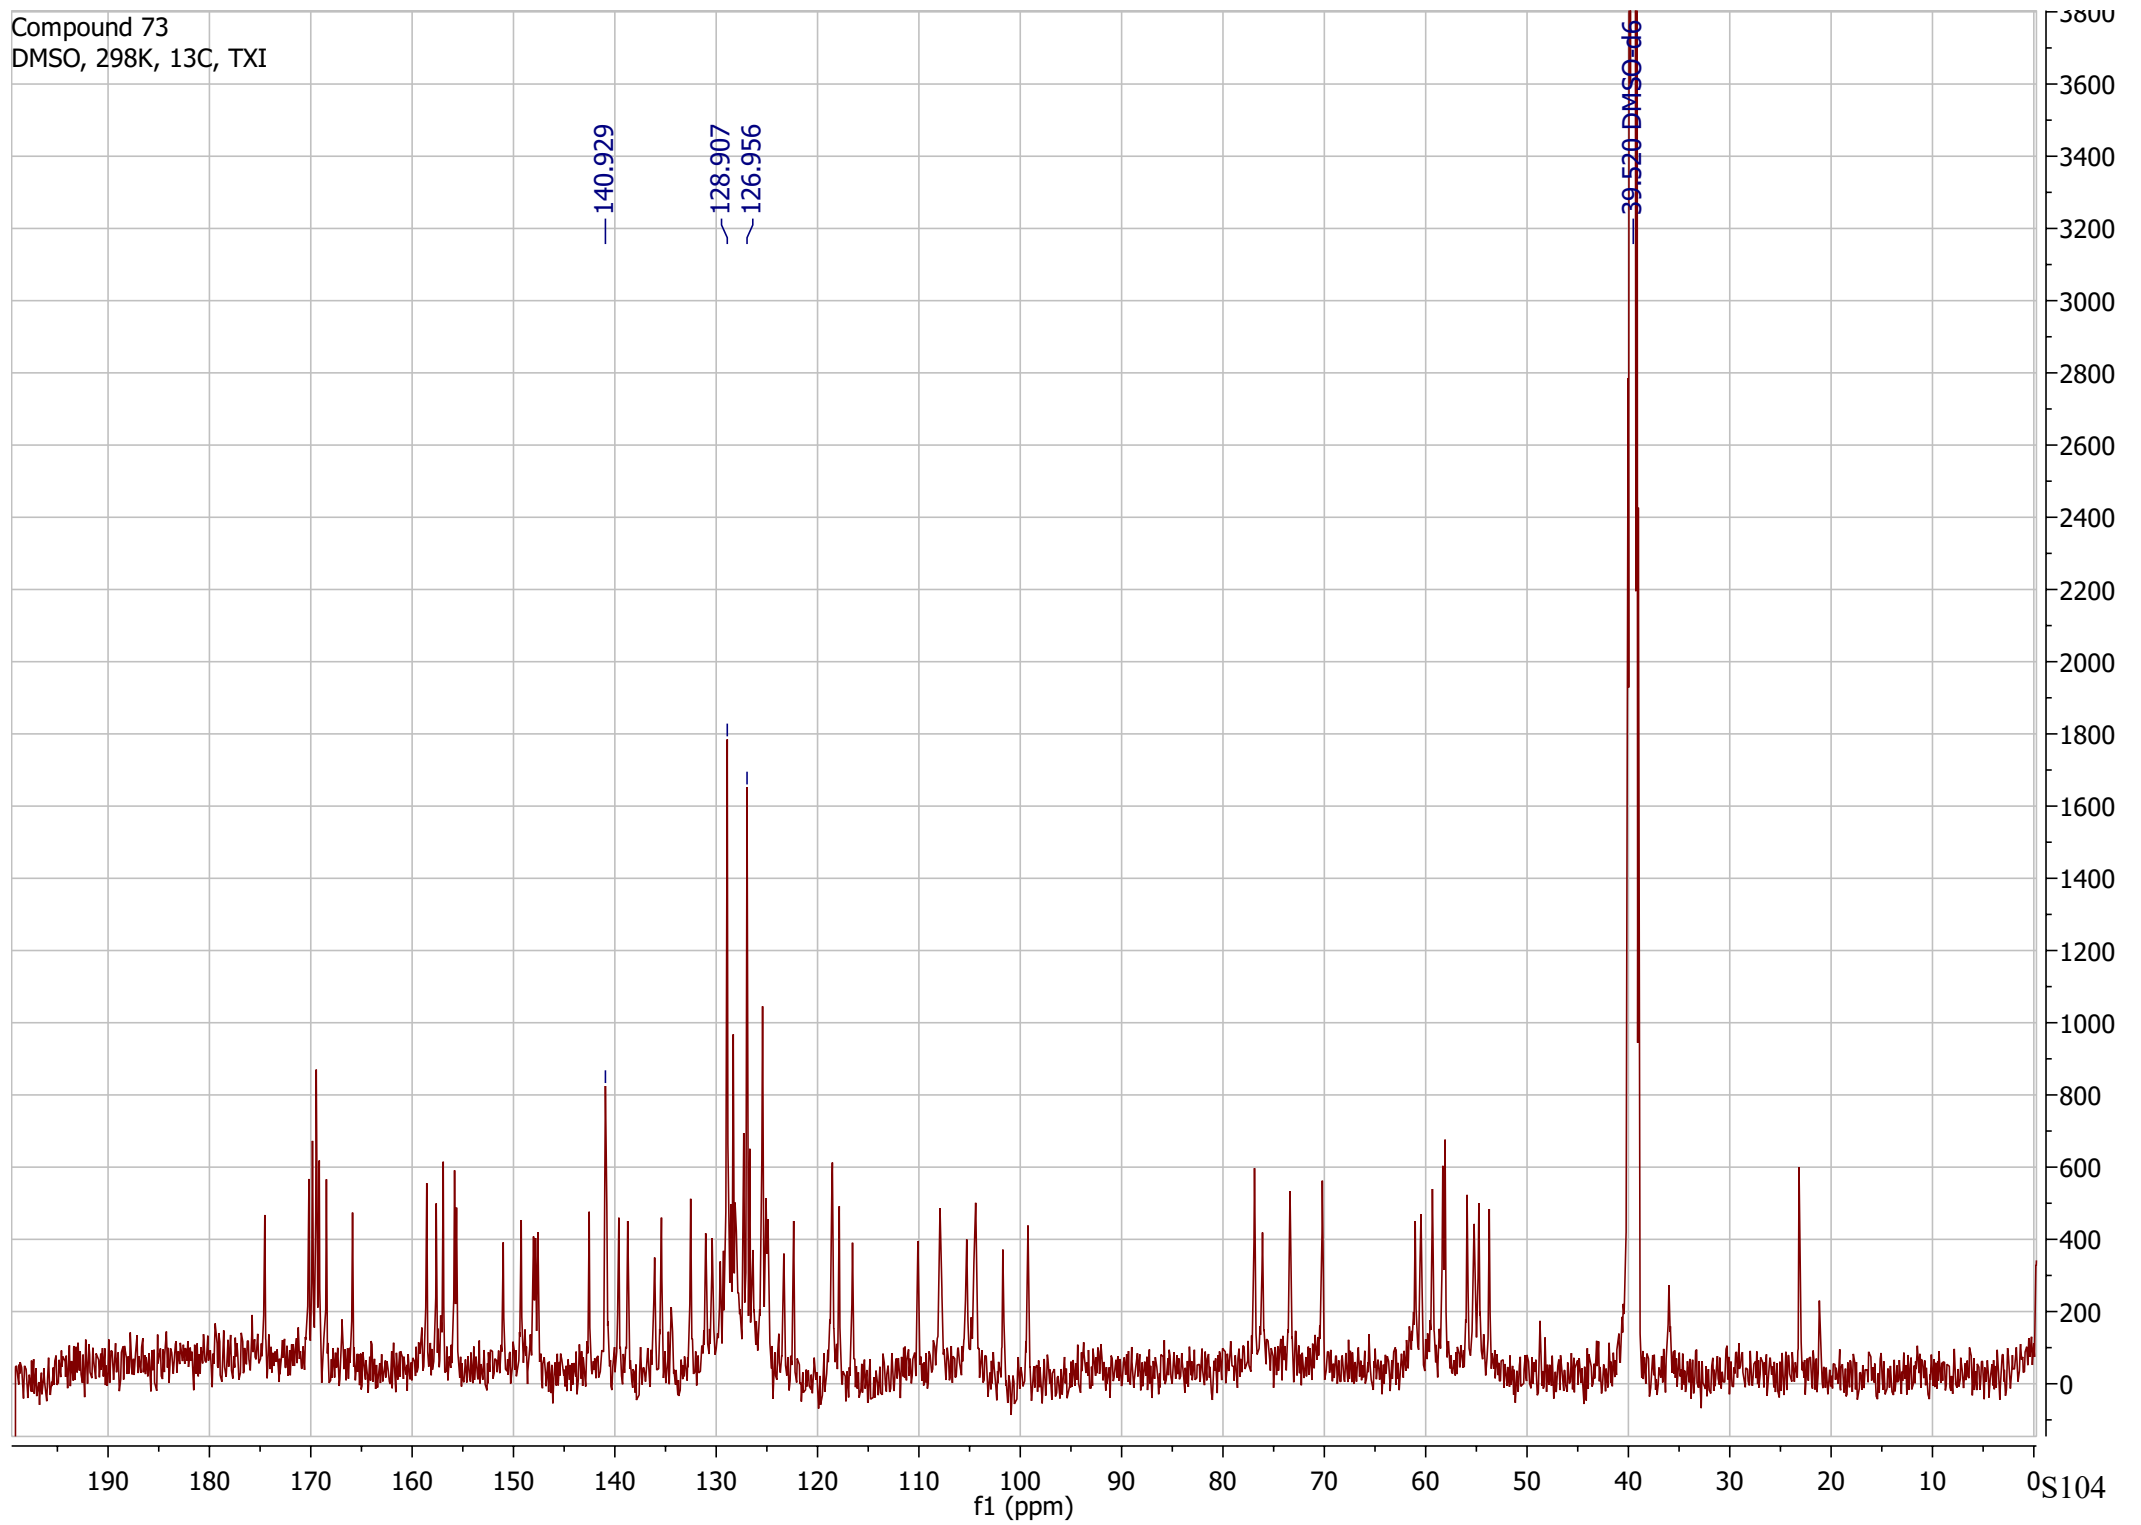

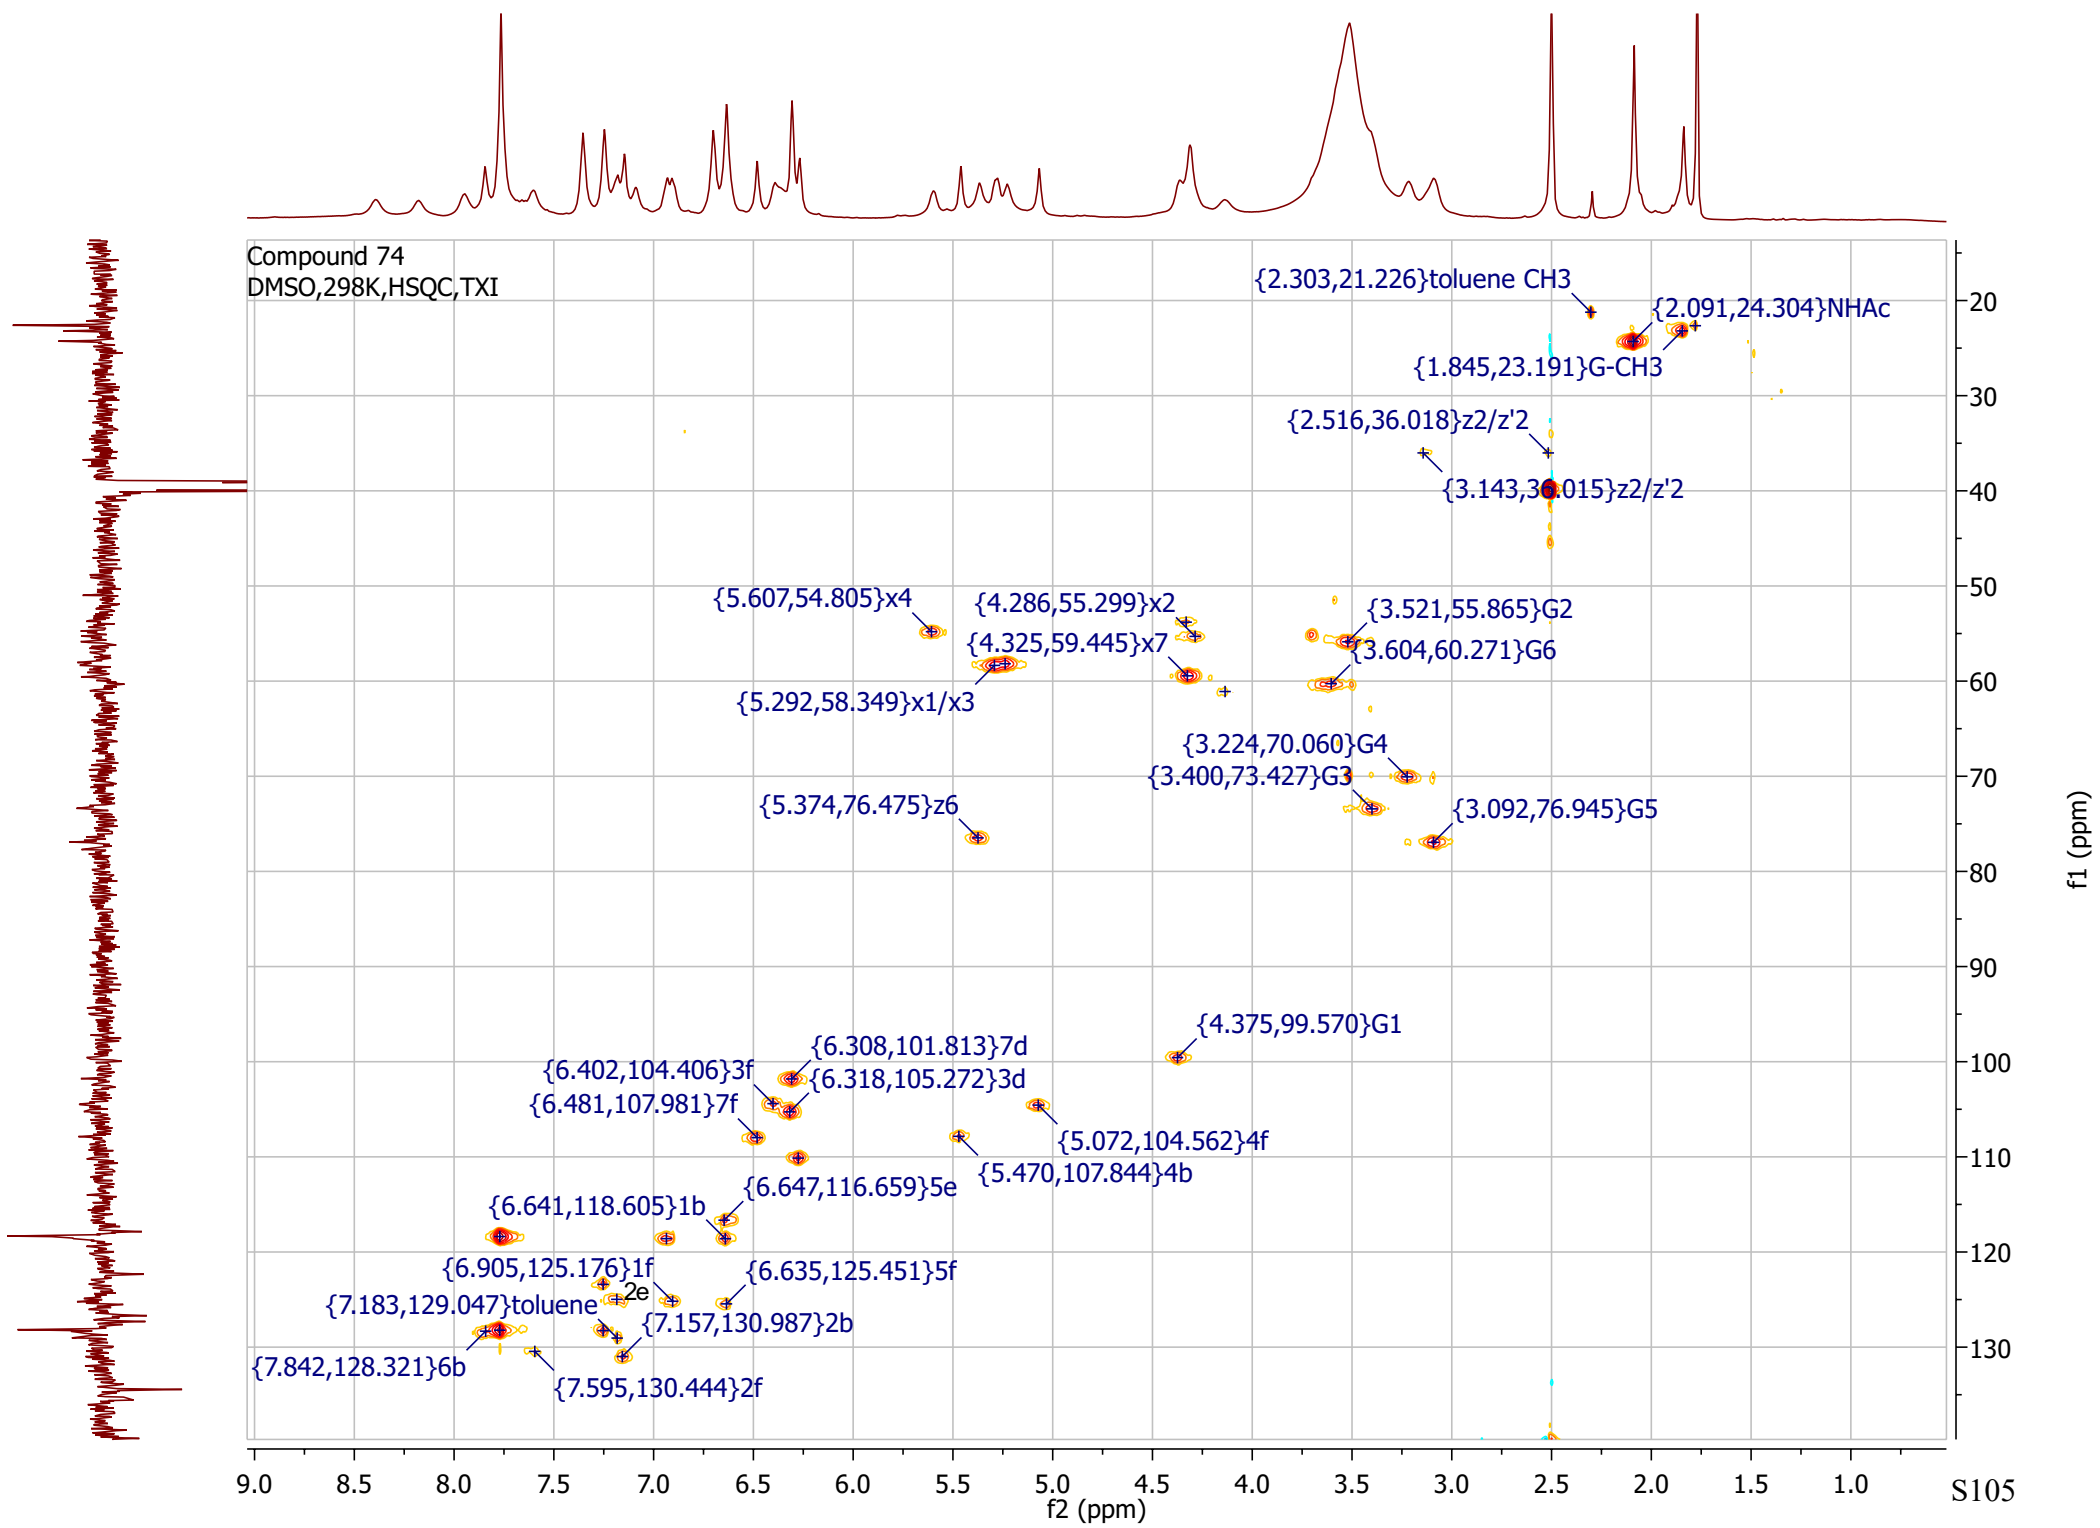

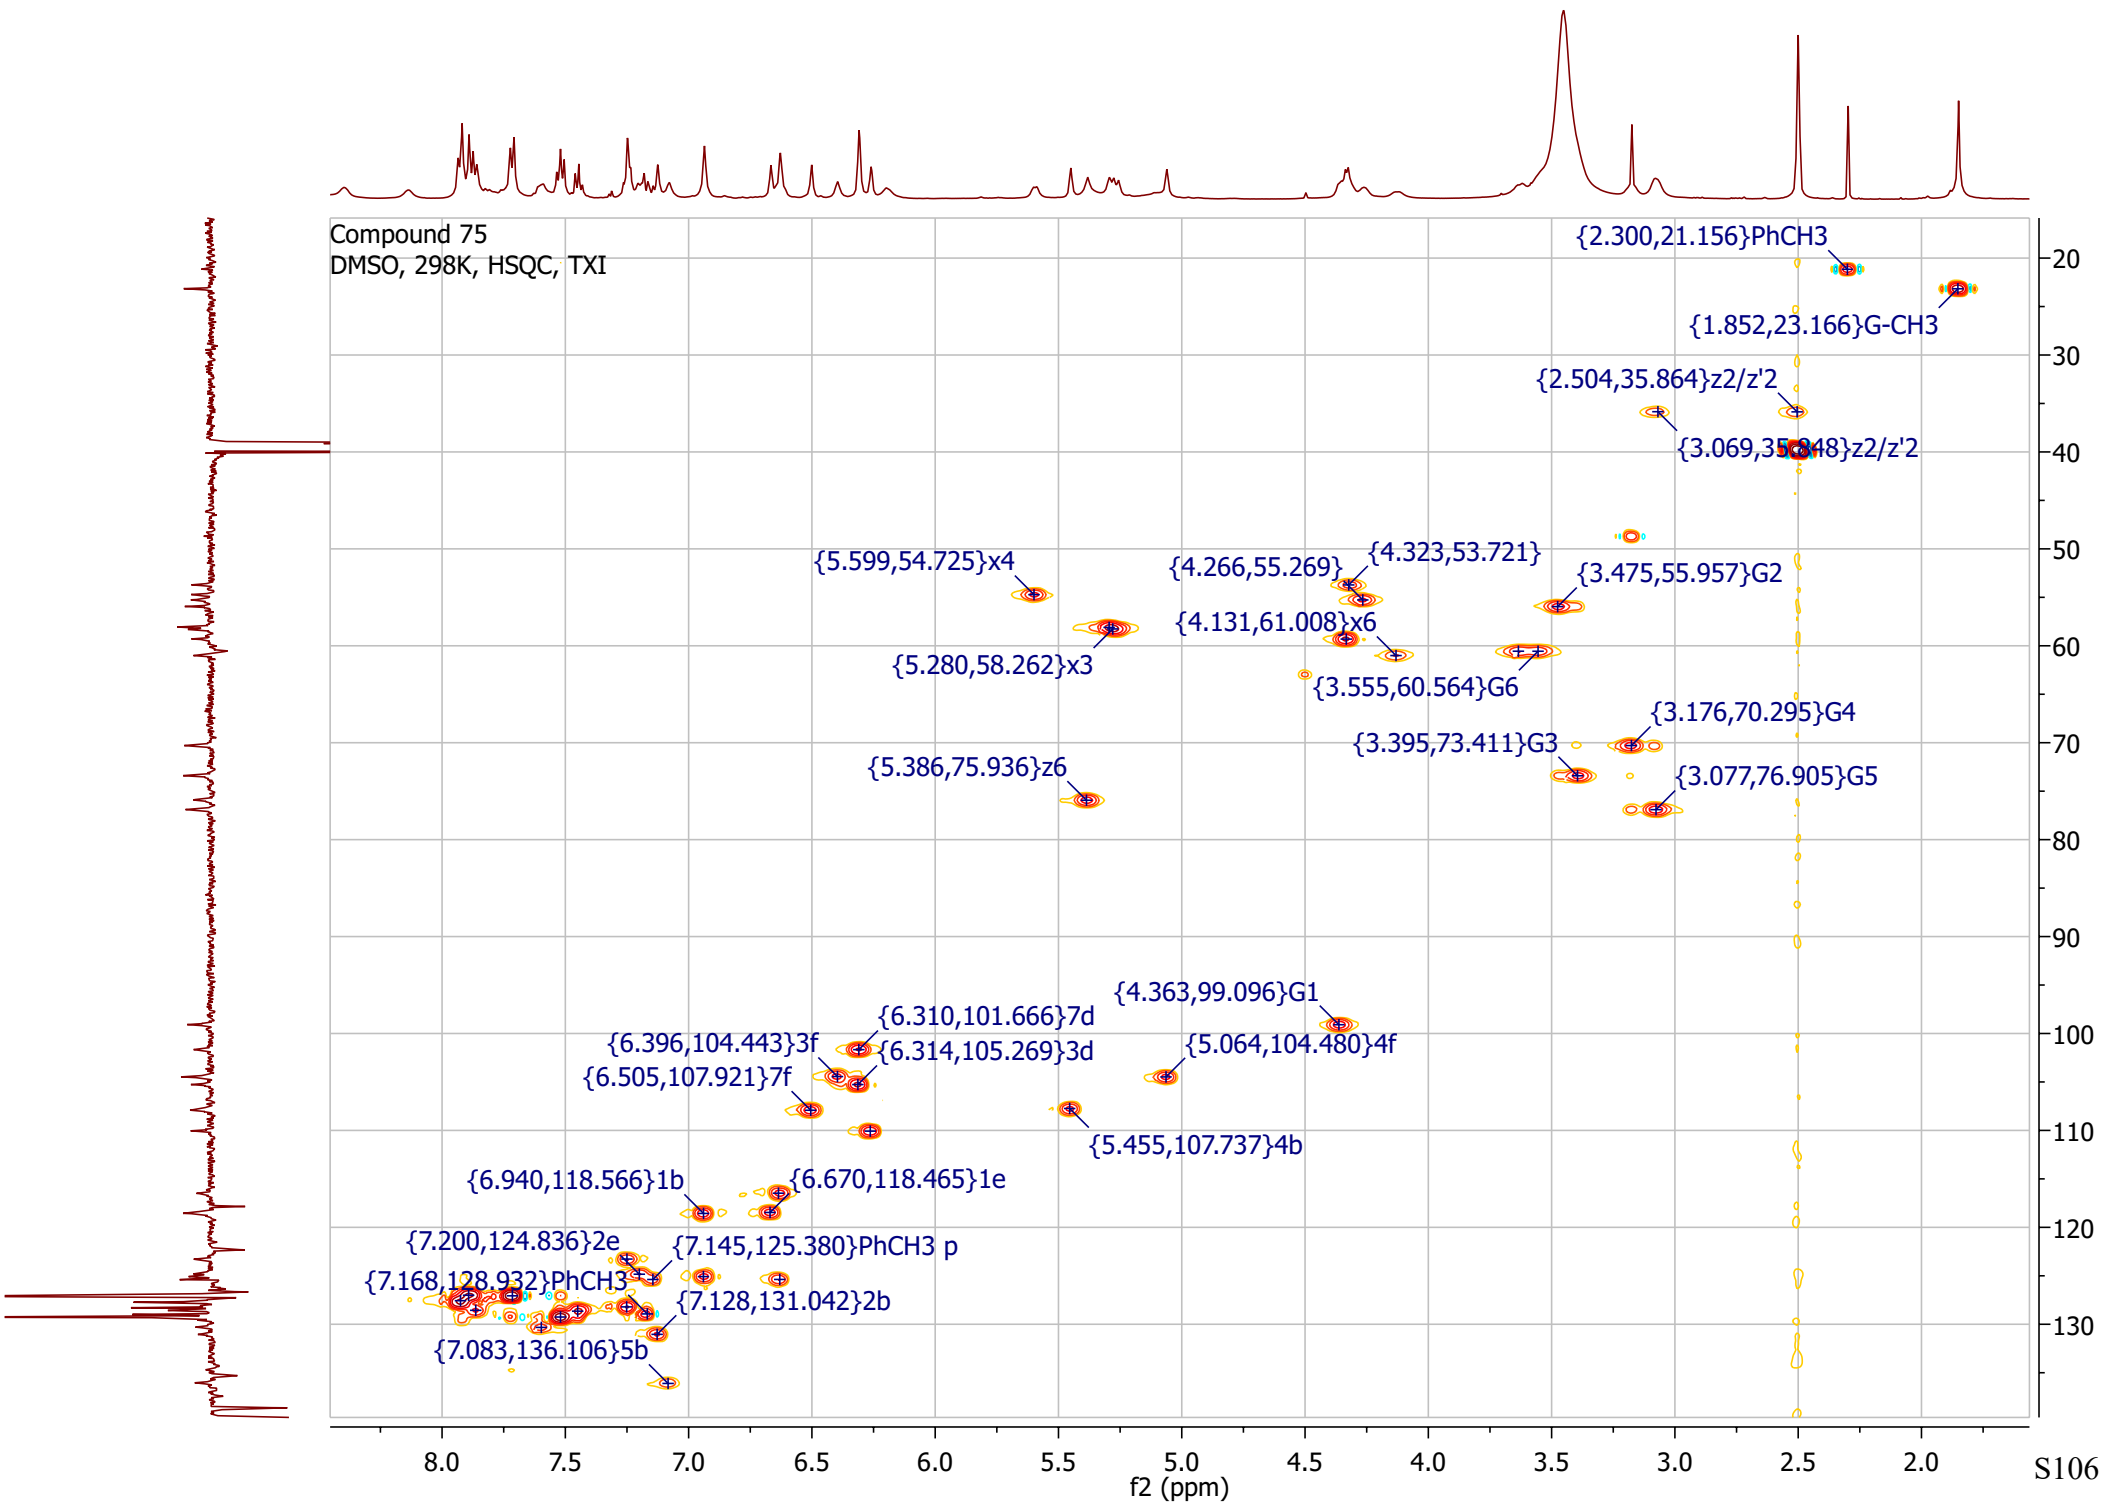

Compound 75  
DMSO, 298K, 13C, TXI

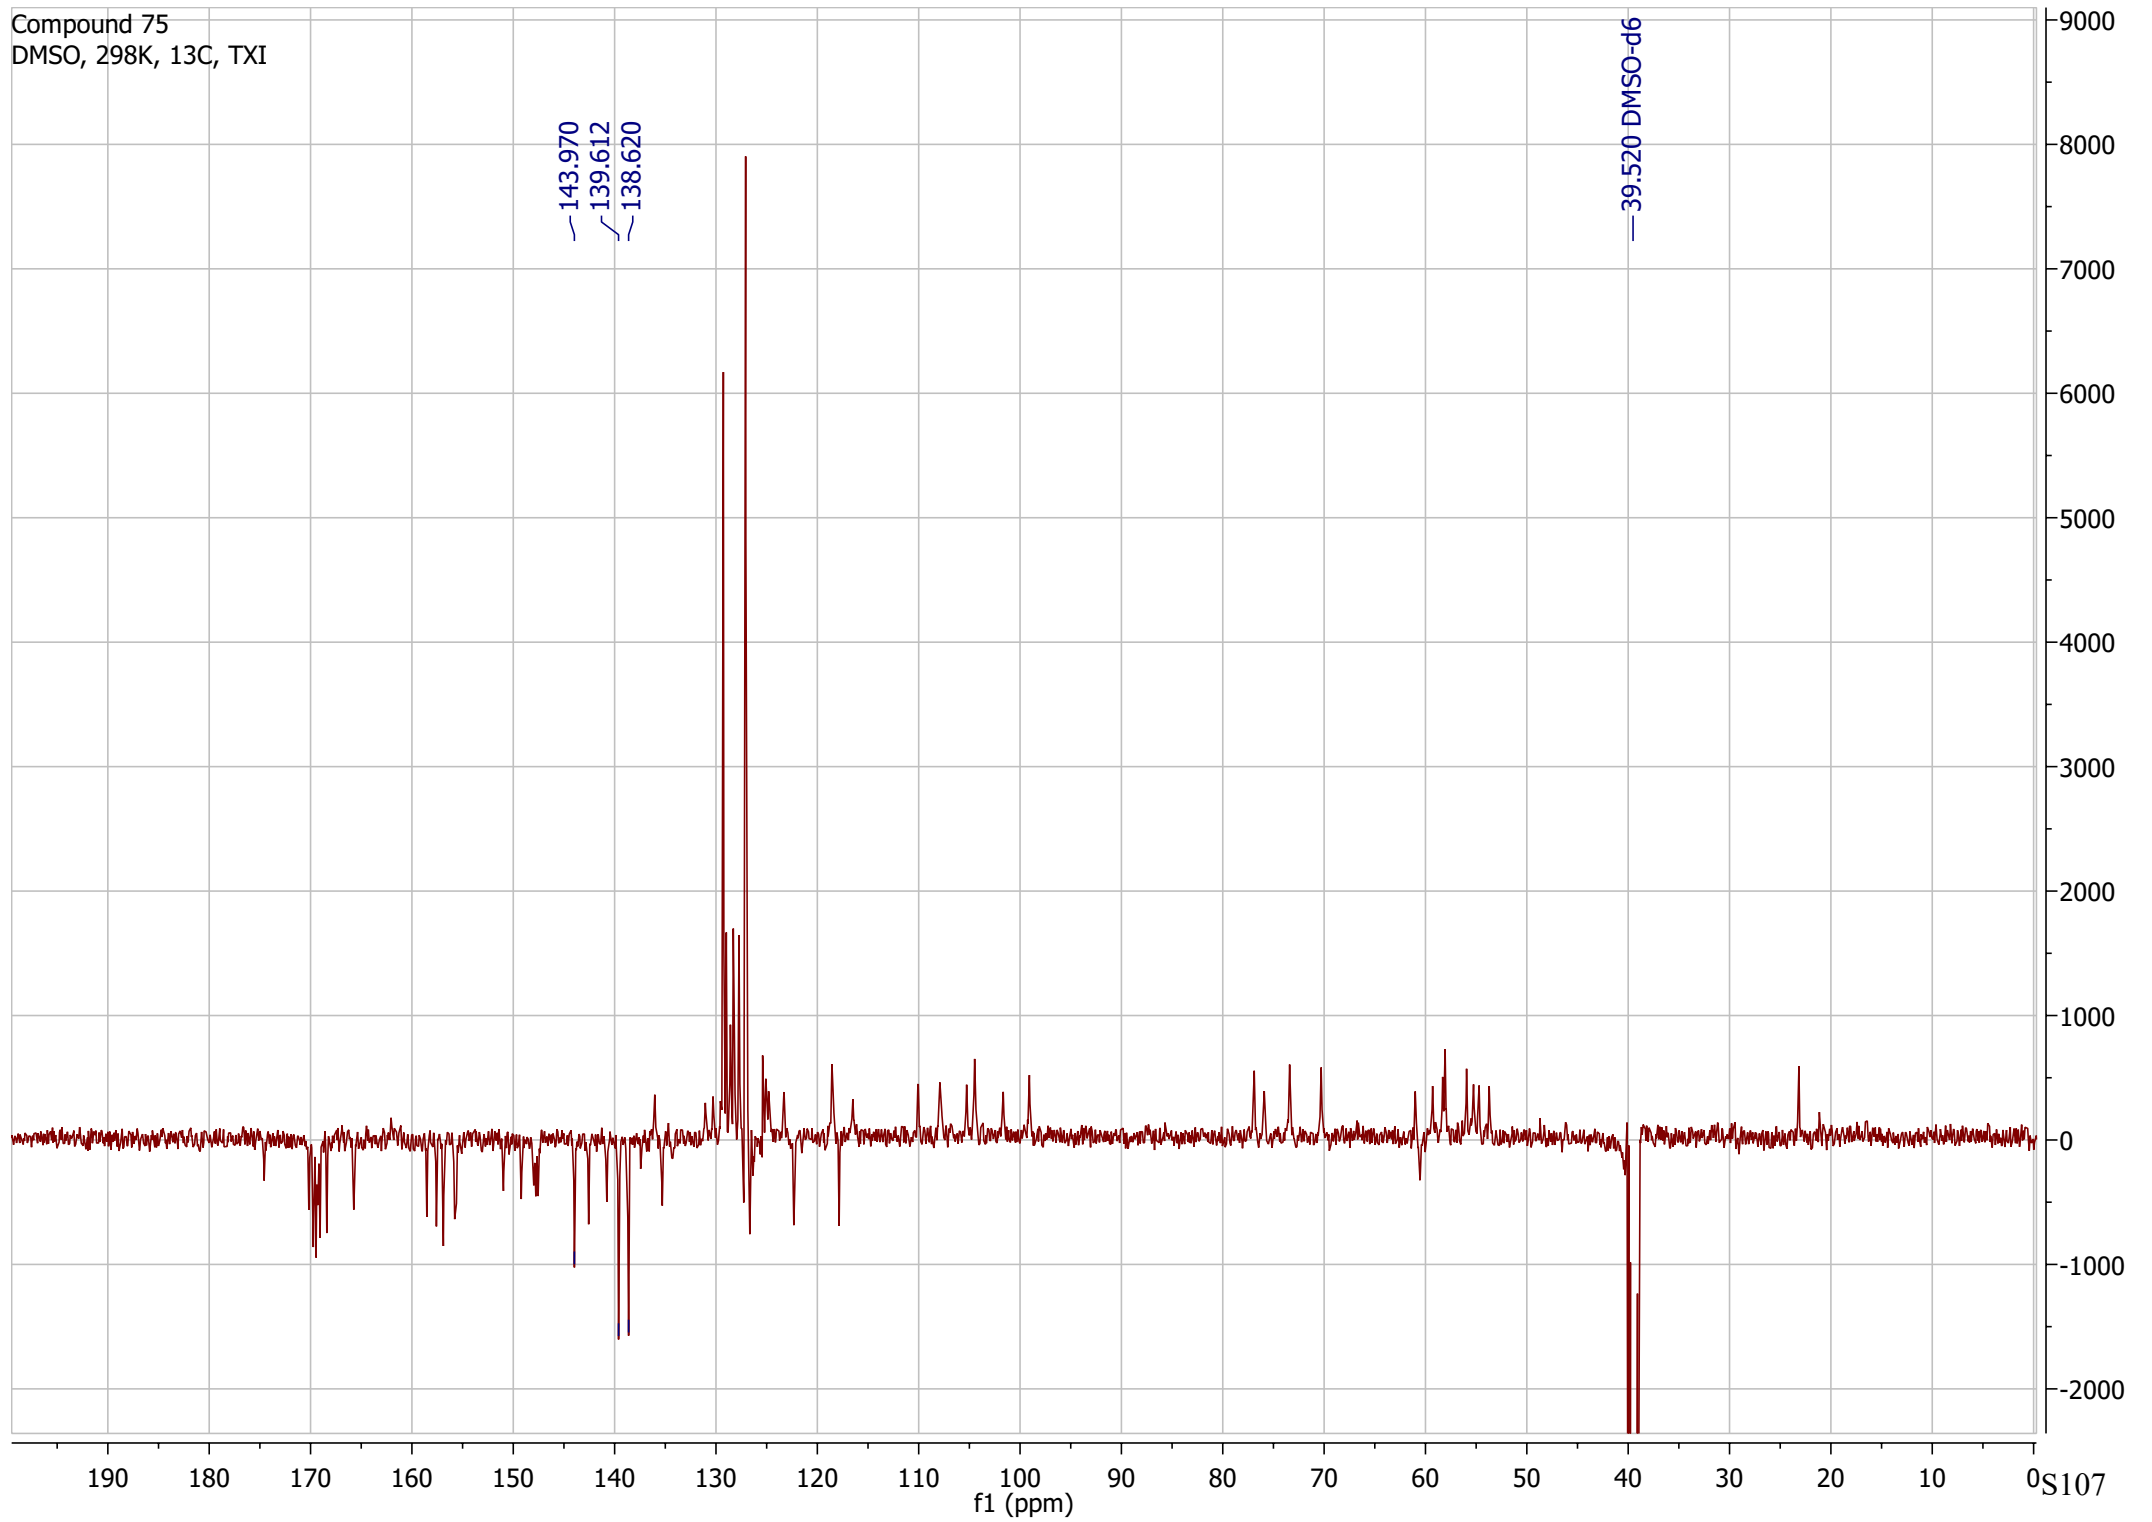

Compound 75  
DMSO, 298K, HMBC, TXI

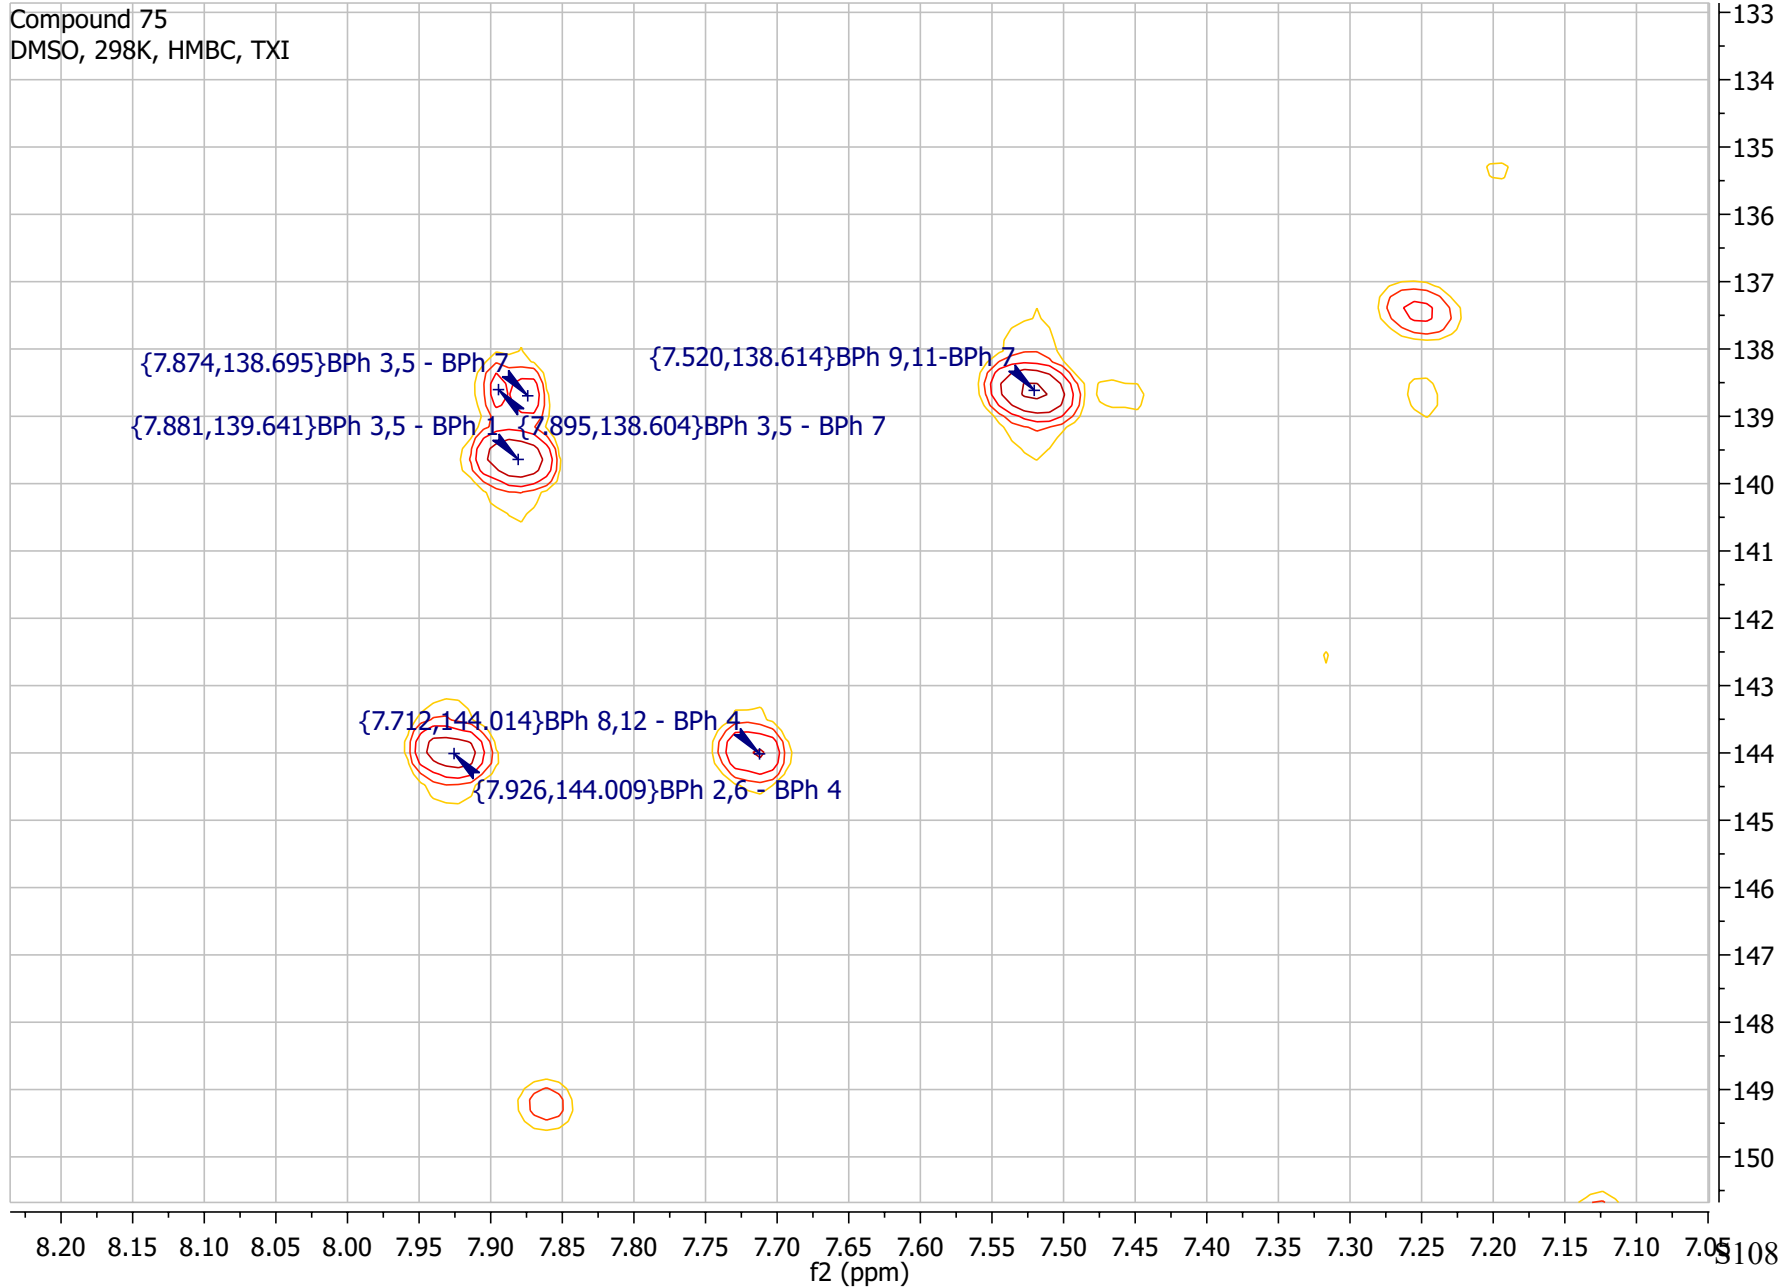

f1 (ppm)

f2 (ppm)

S108



Compound 75  
DMSO, 298K, HSQC, TXI

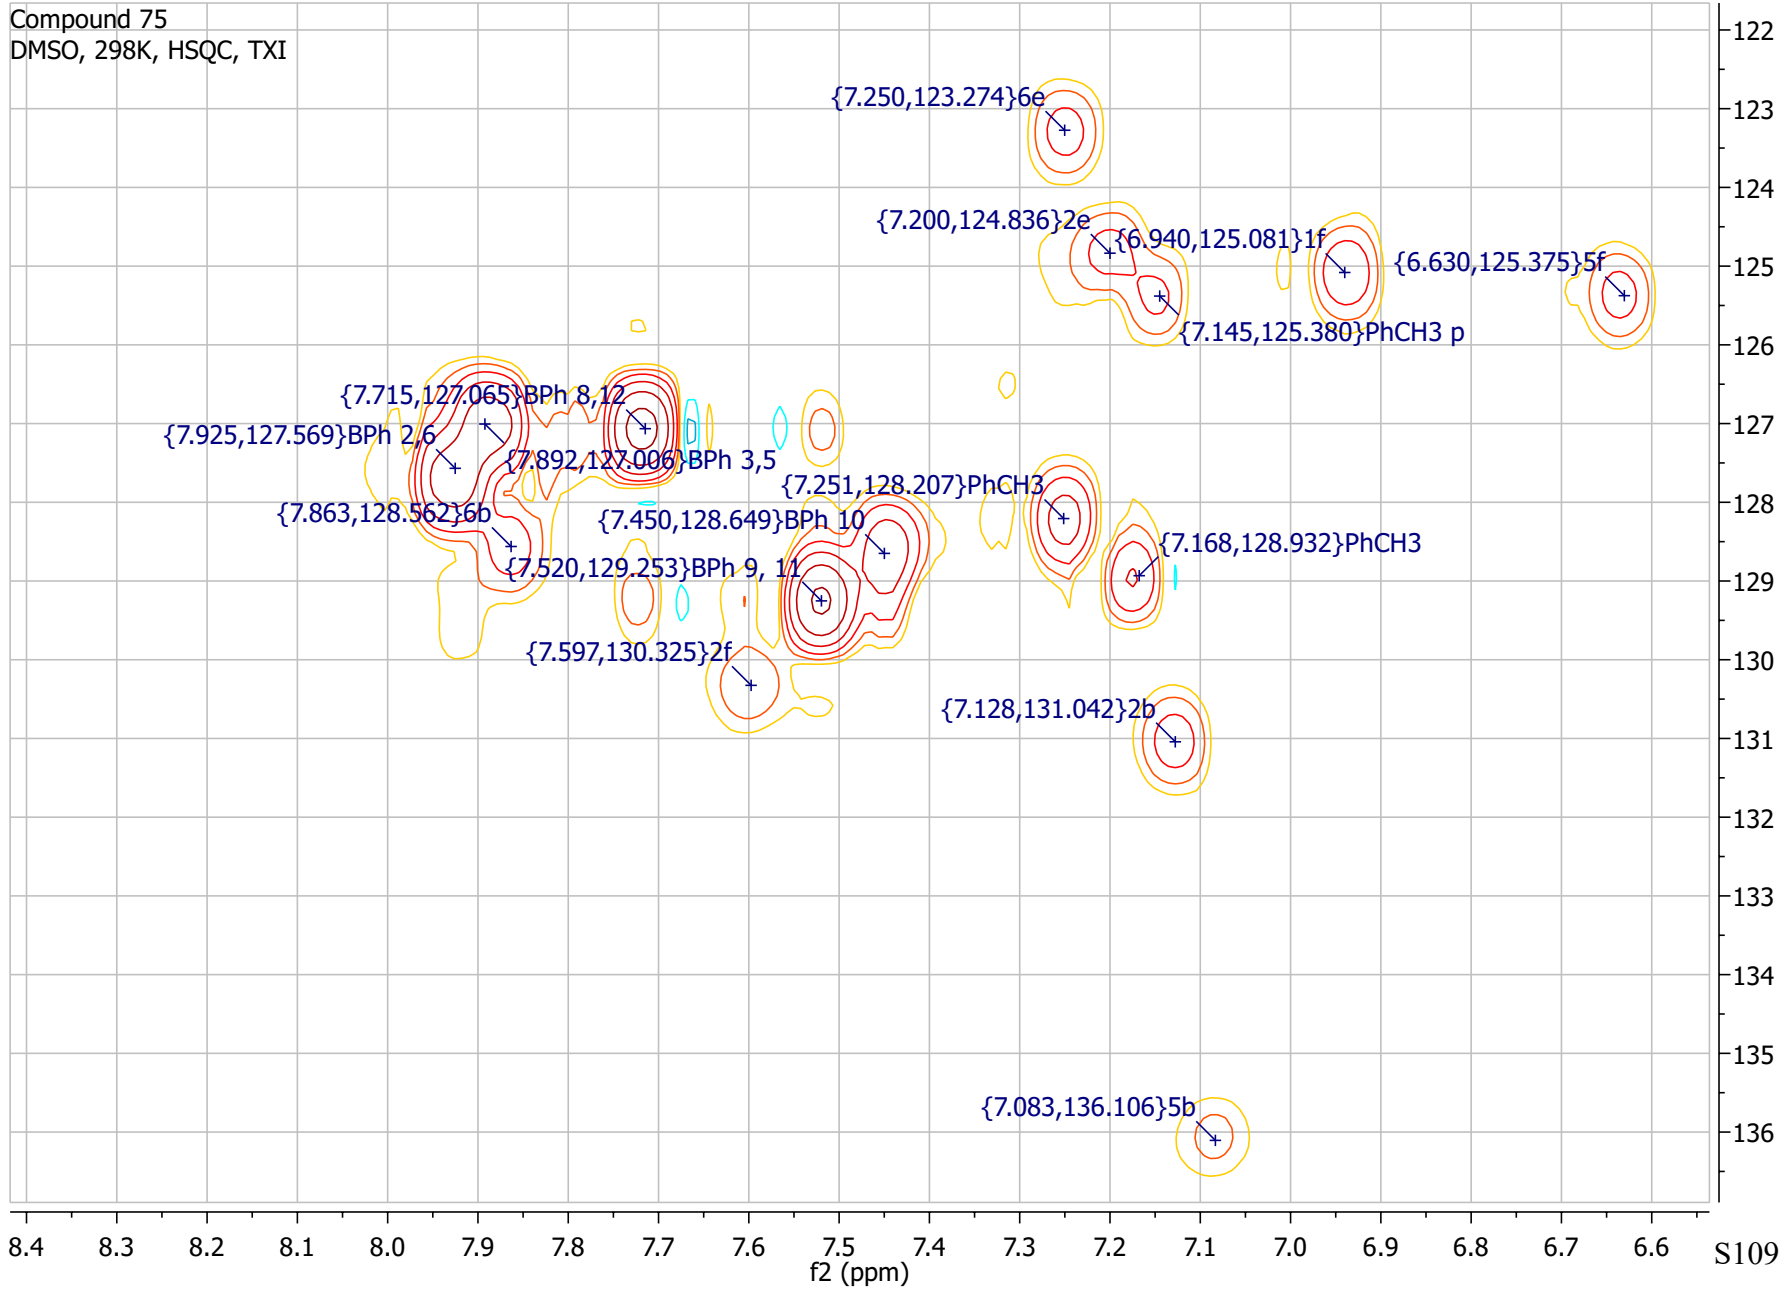

f1 (ppm)

f2 (ppm)

S109

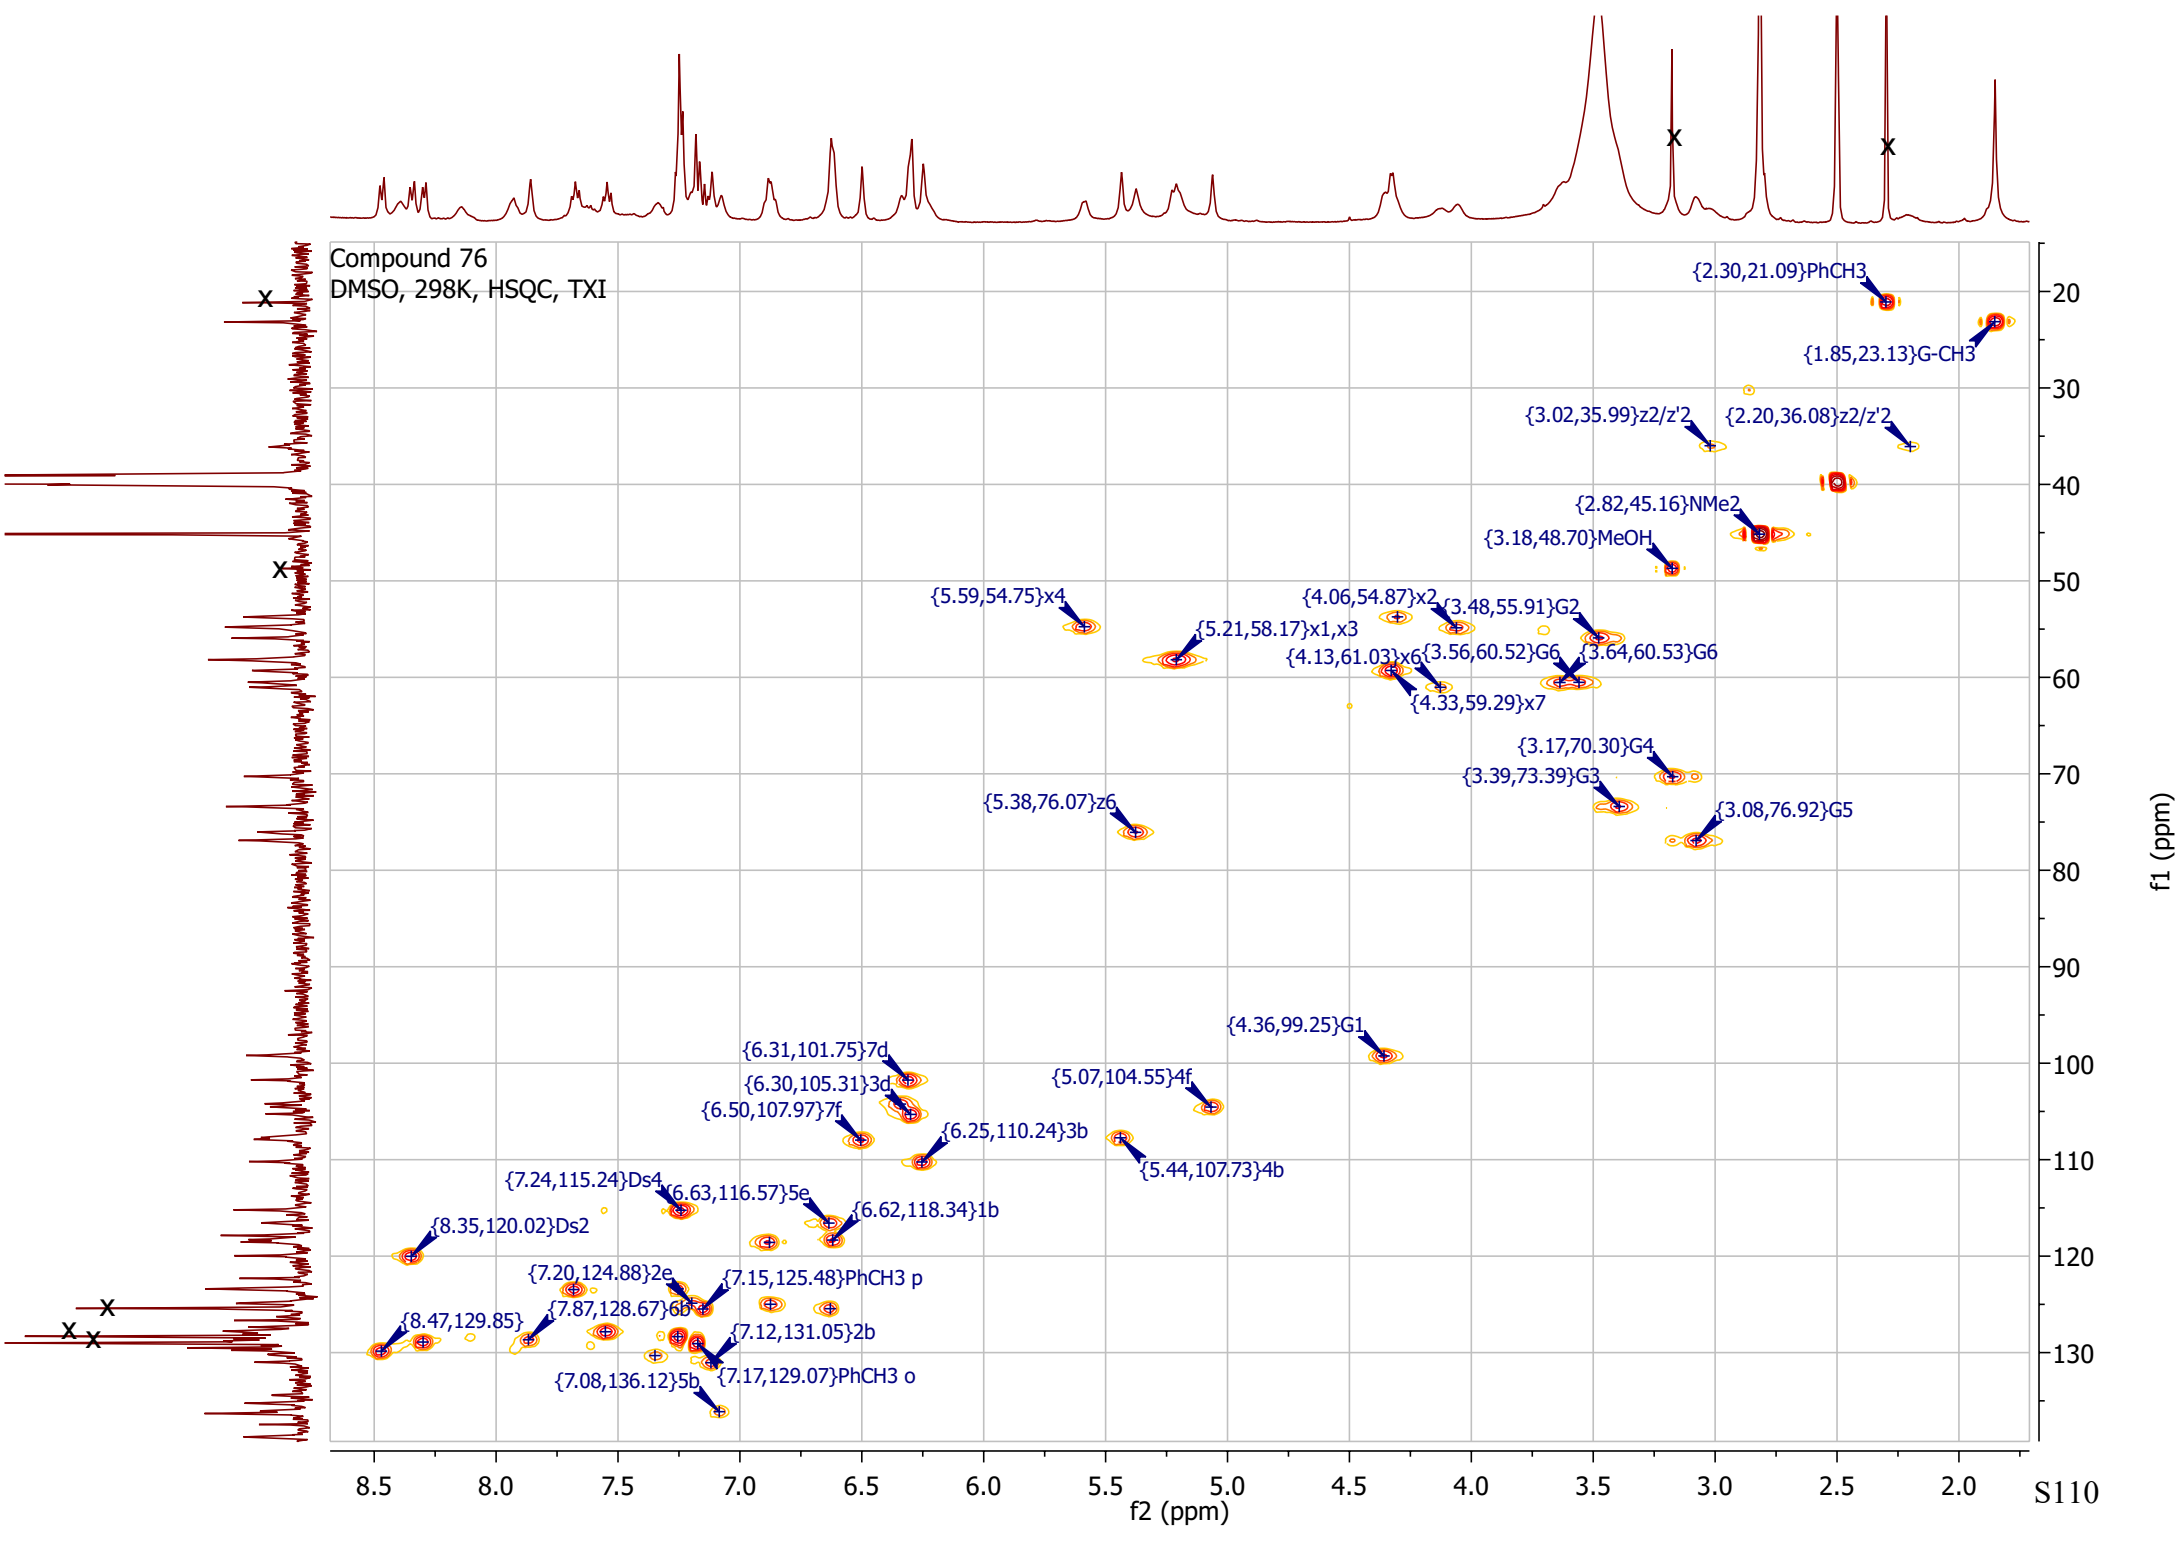

Compound 76  
DMSO, 298K, 13C, TXI

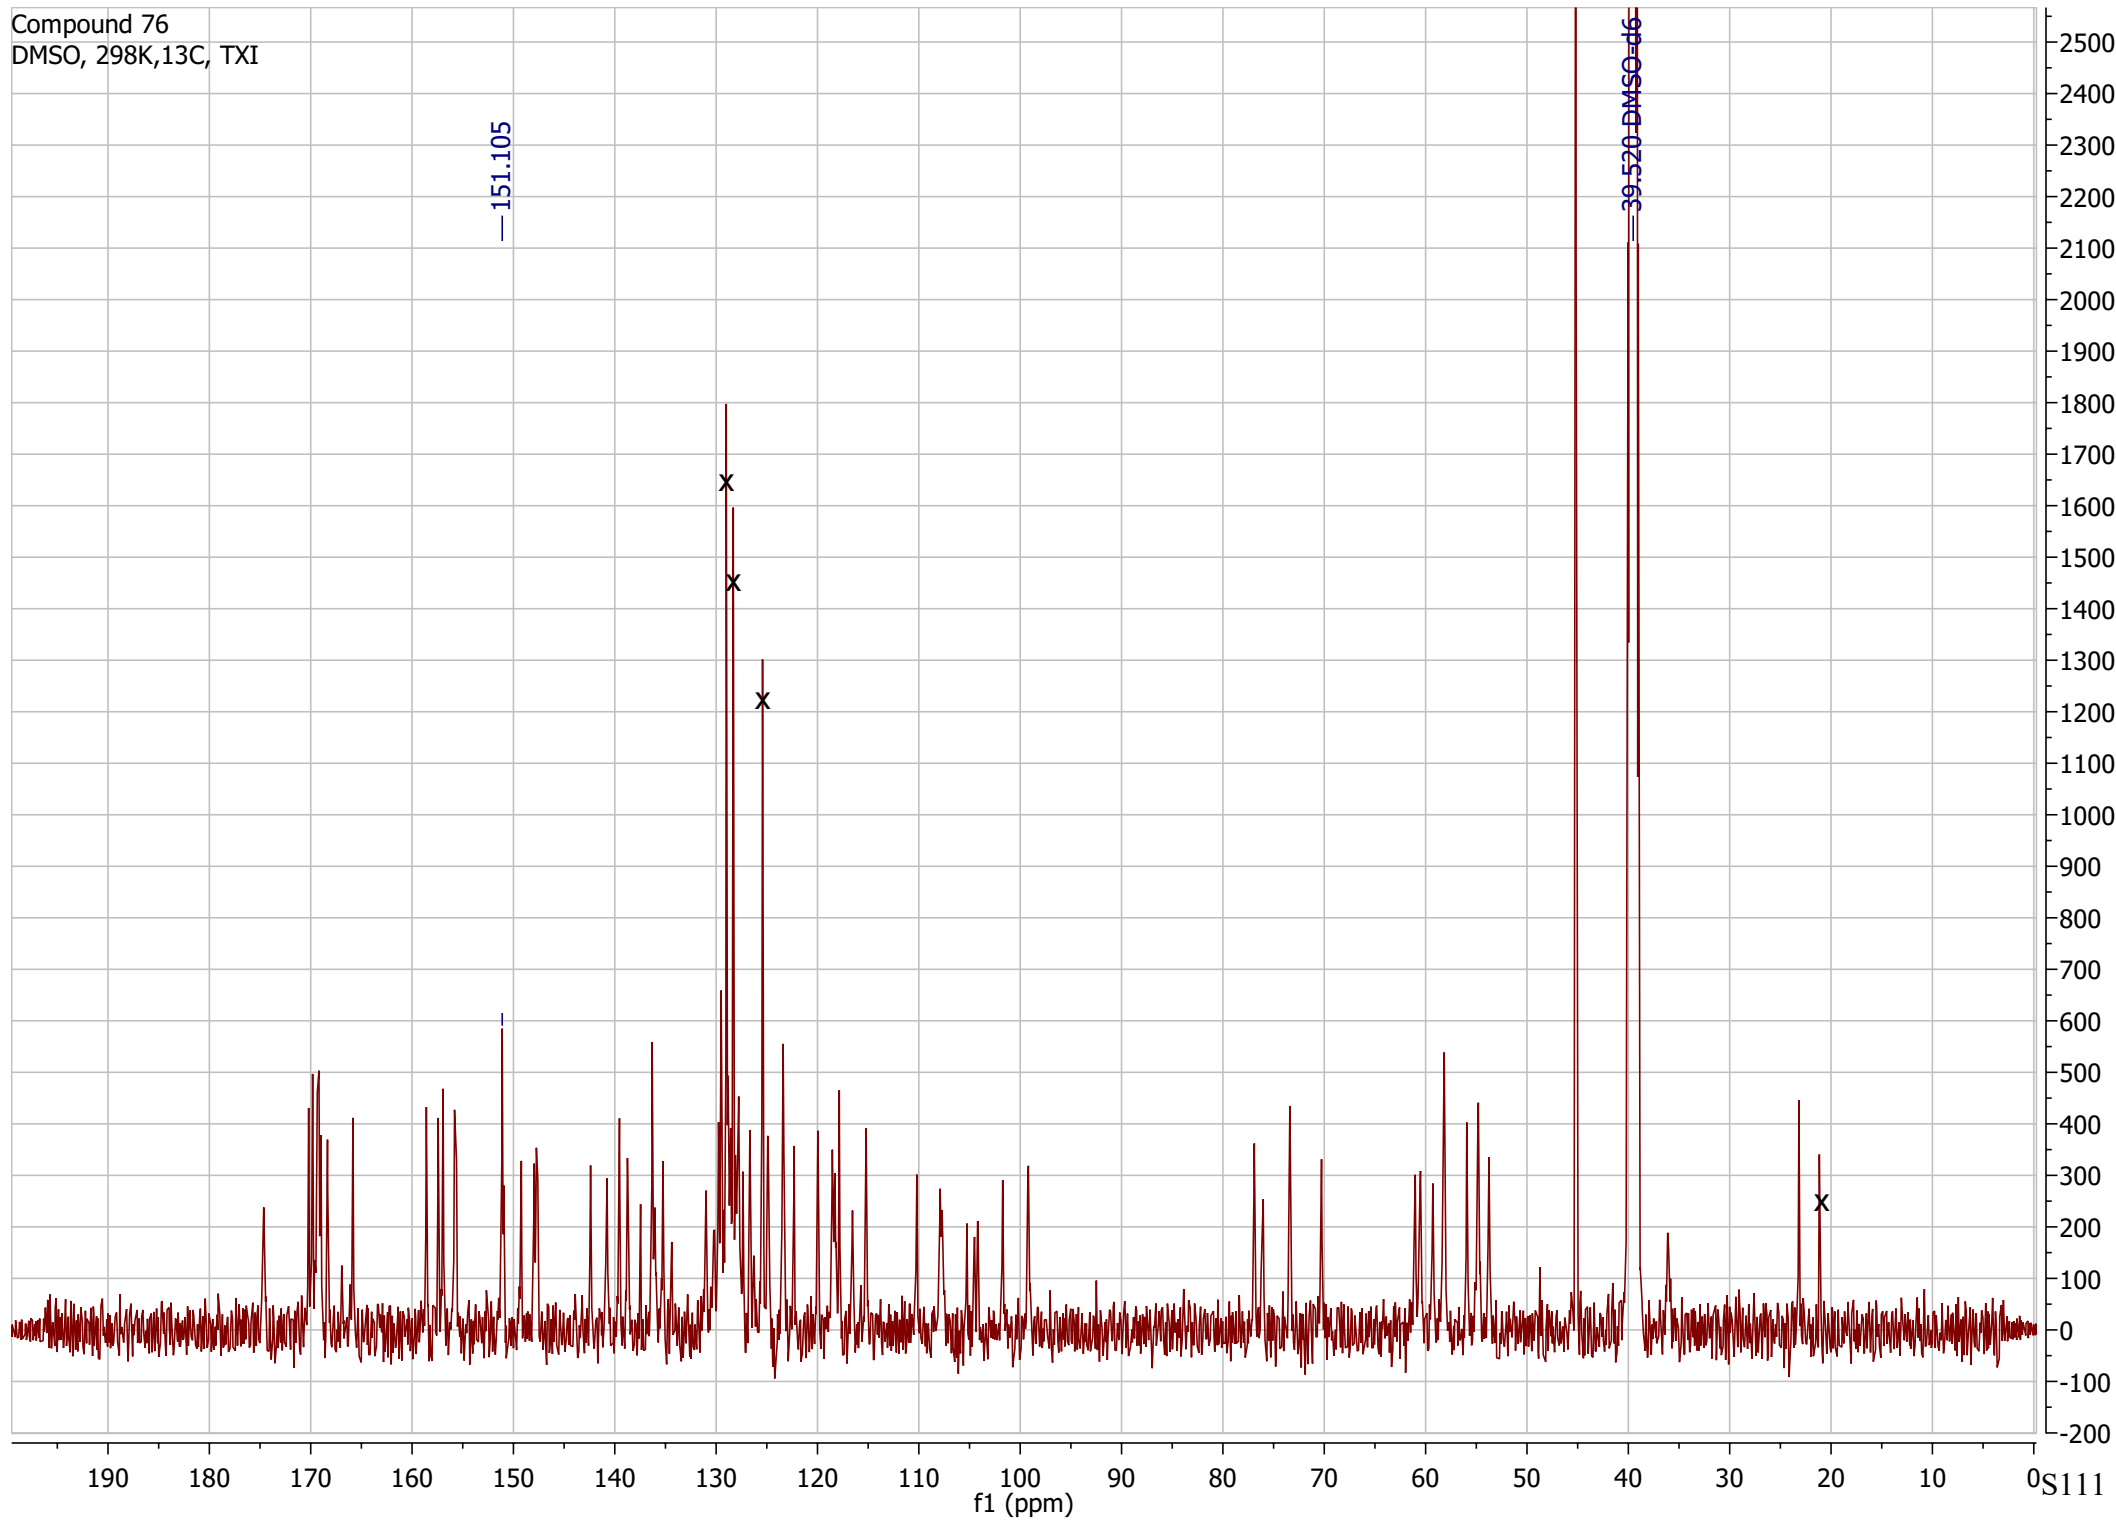

S111

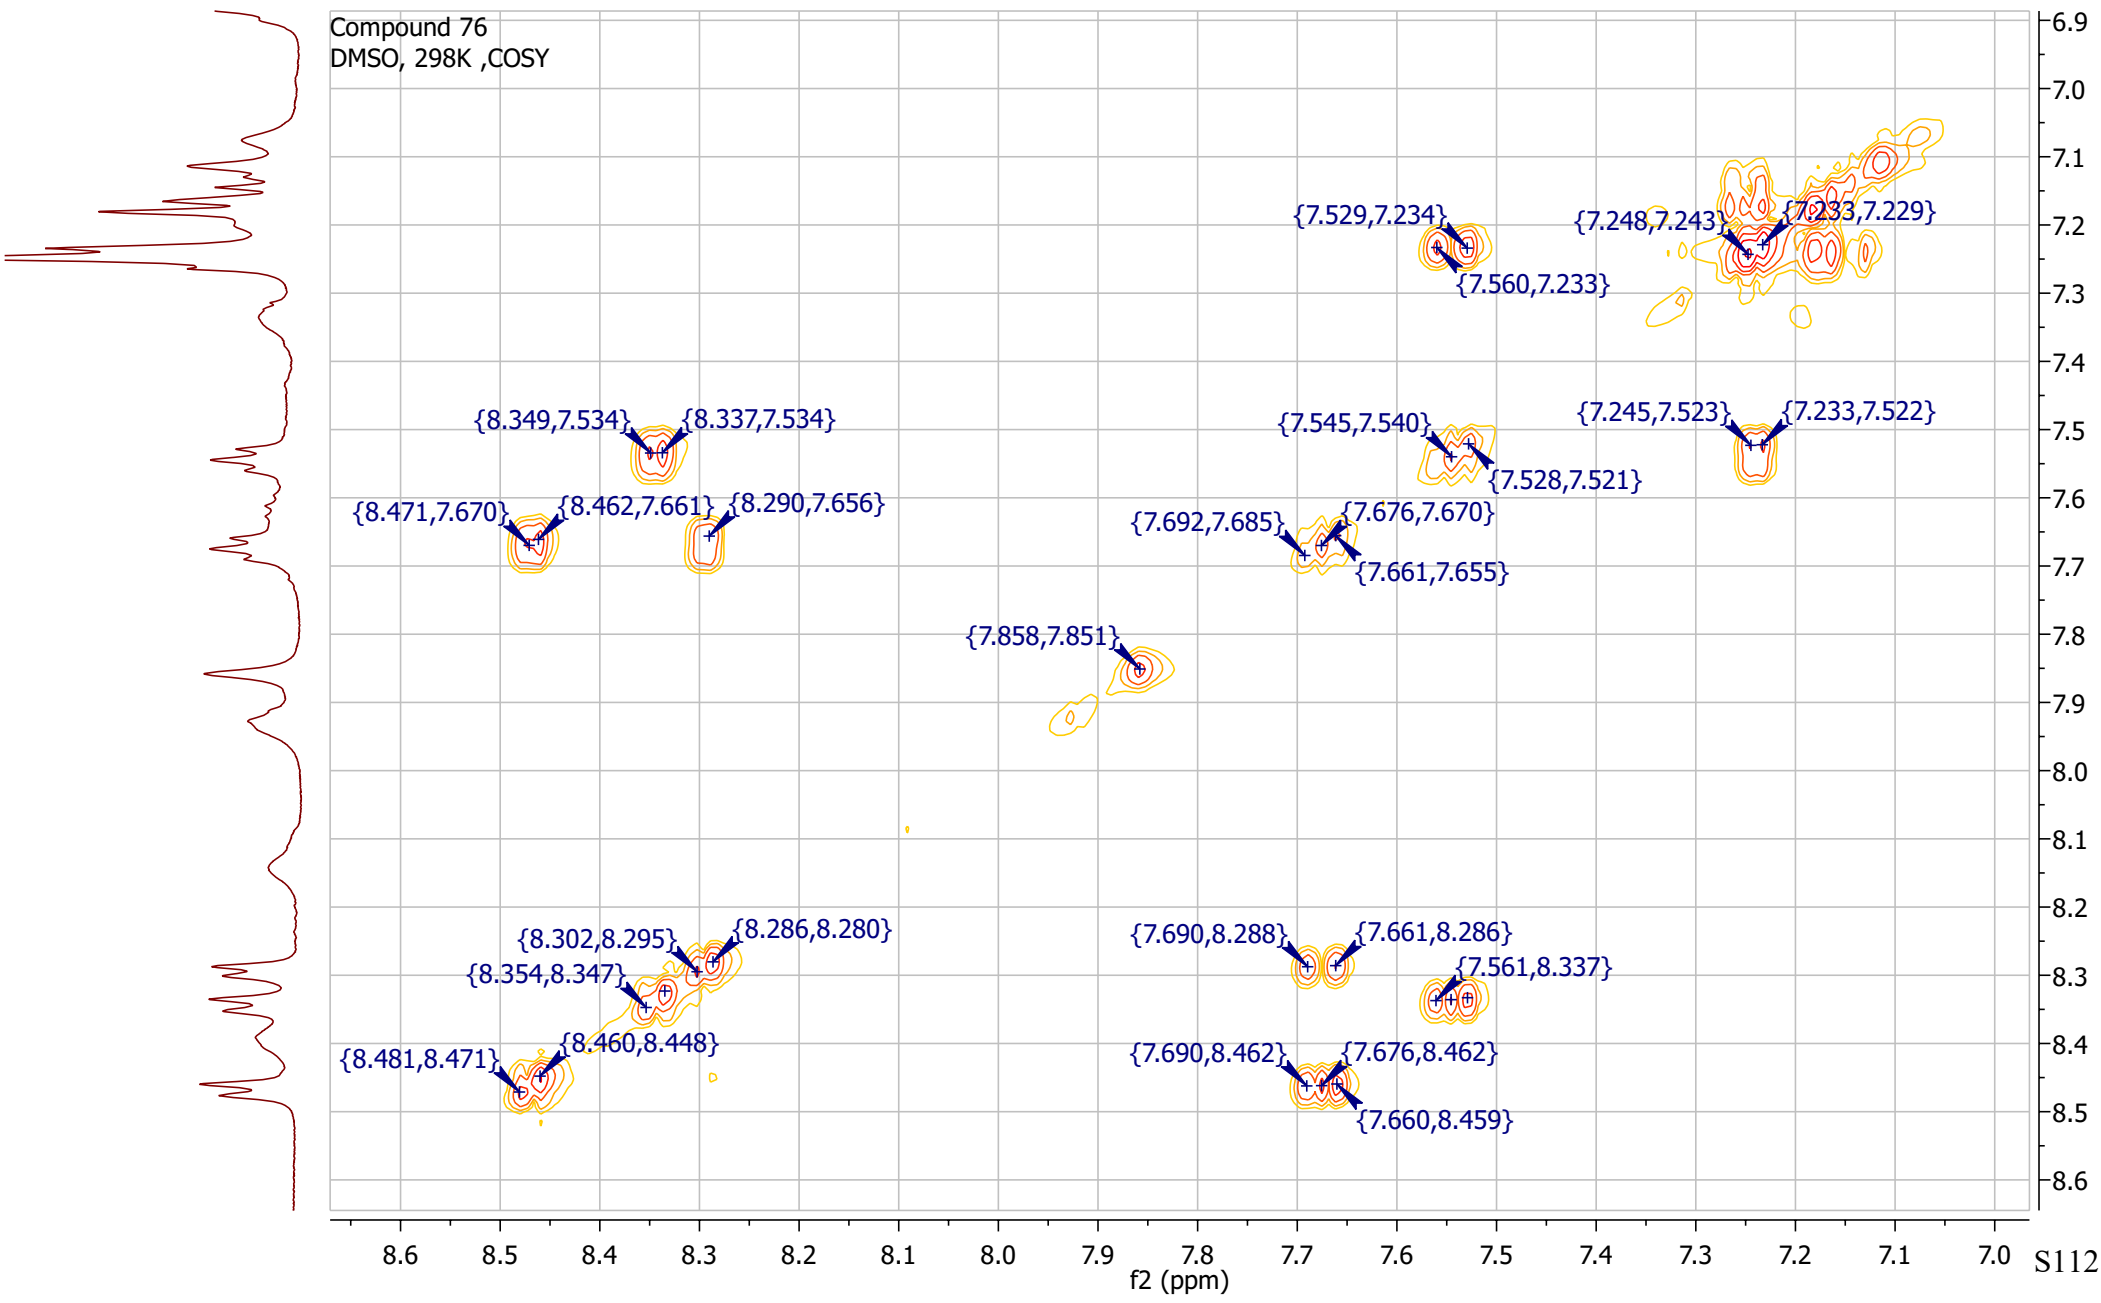

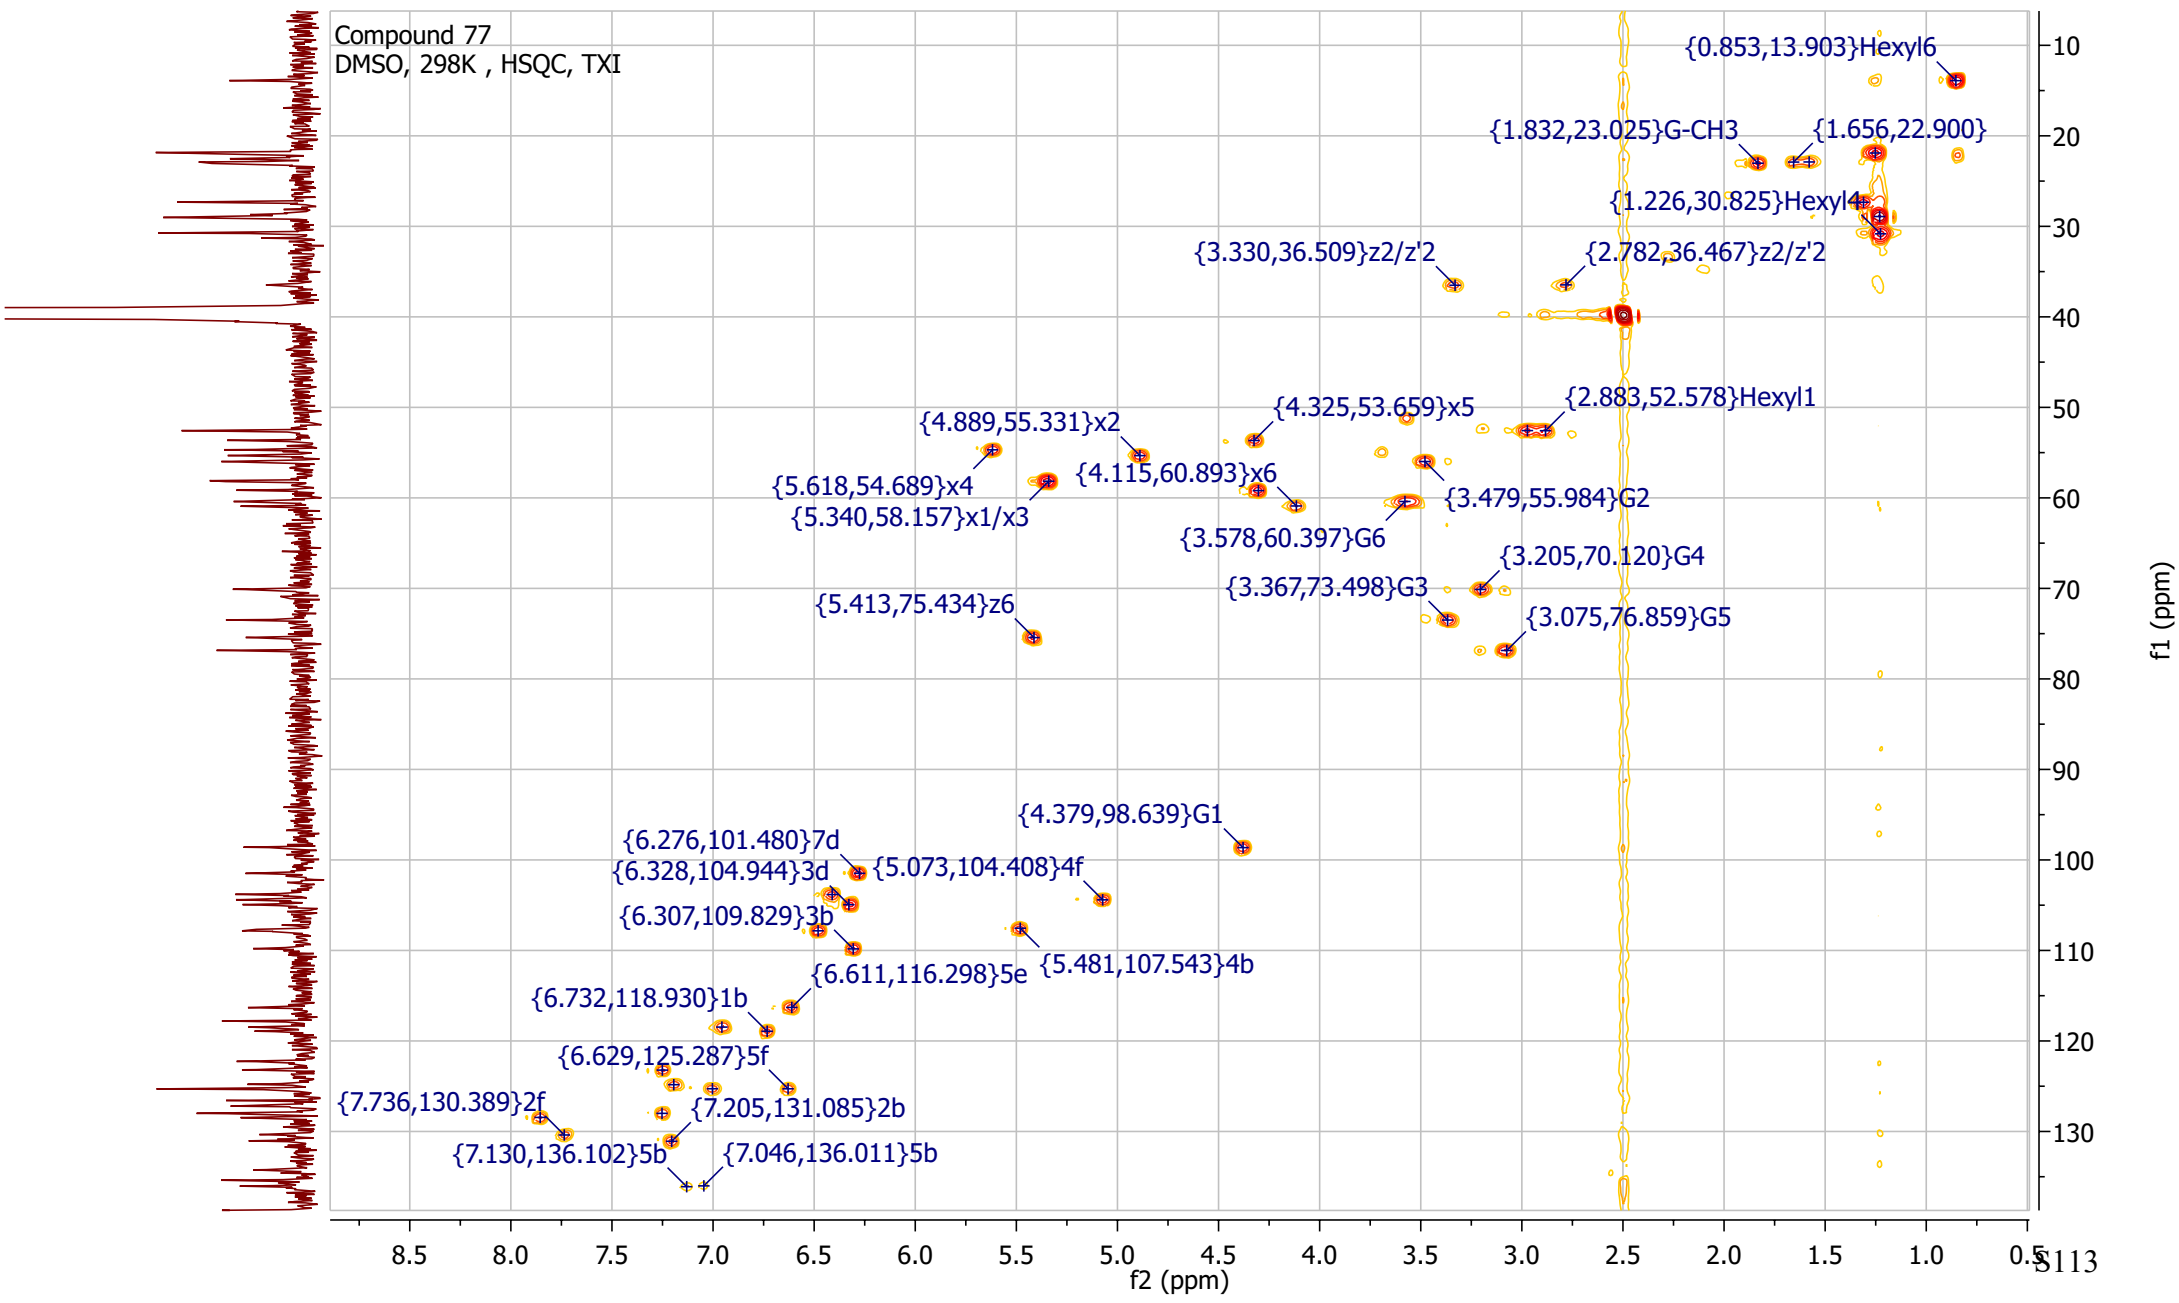

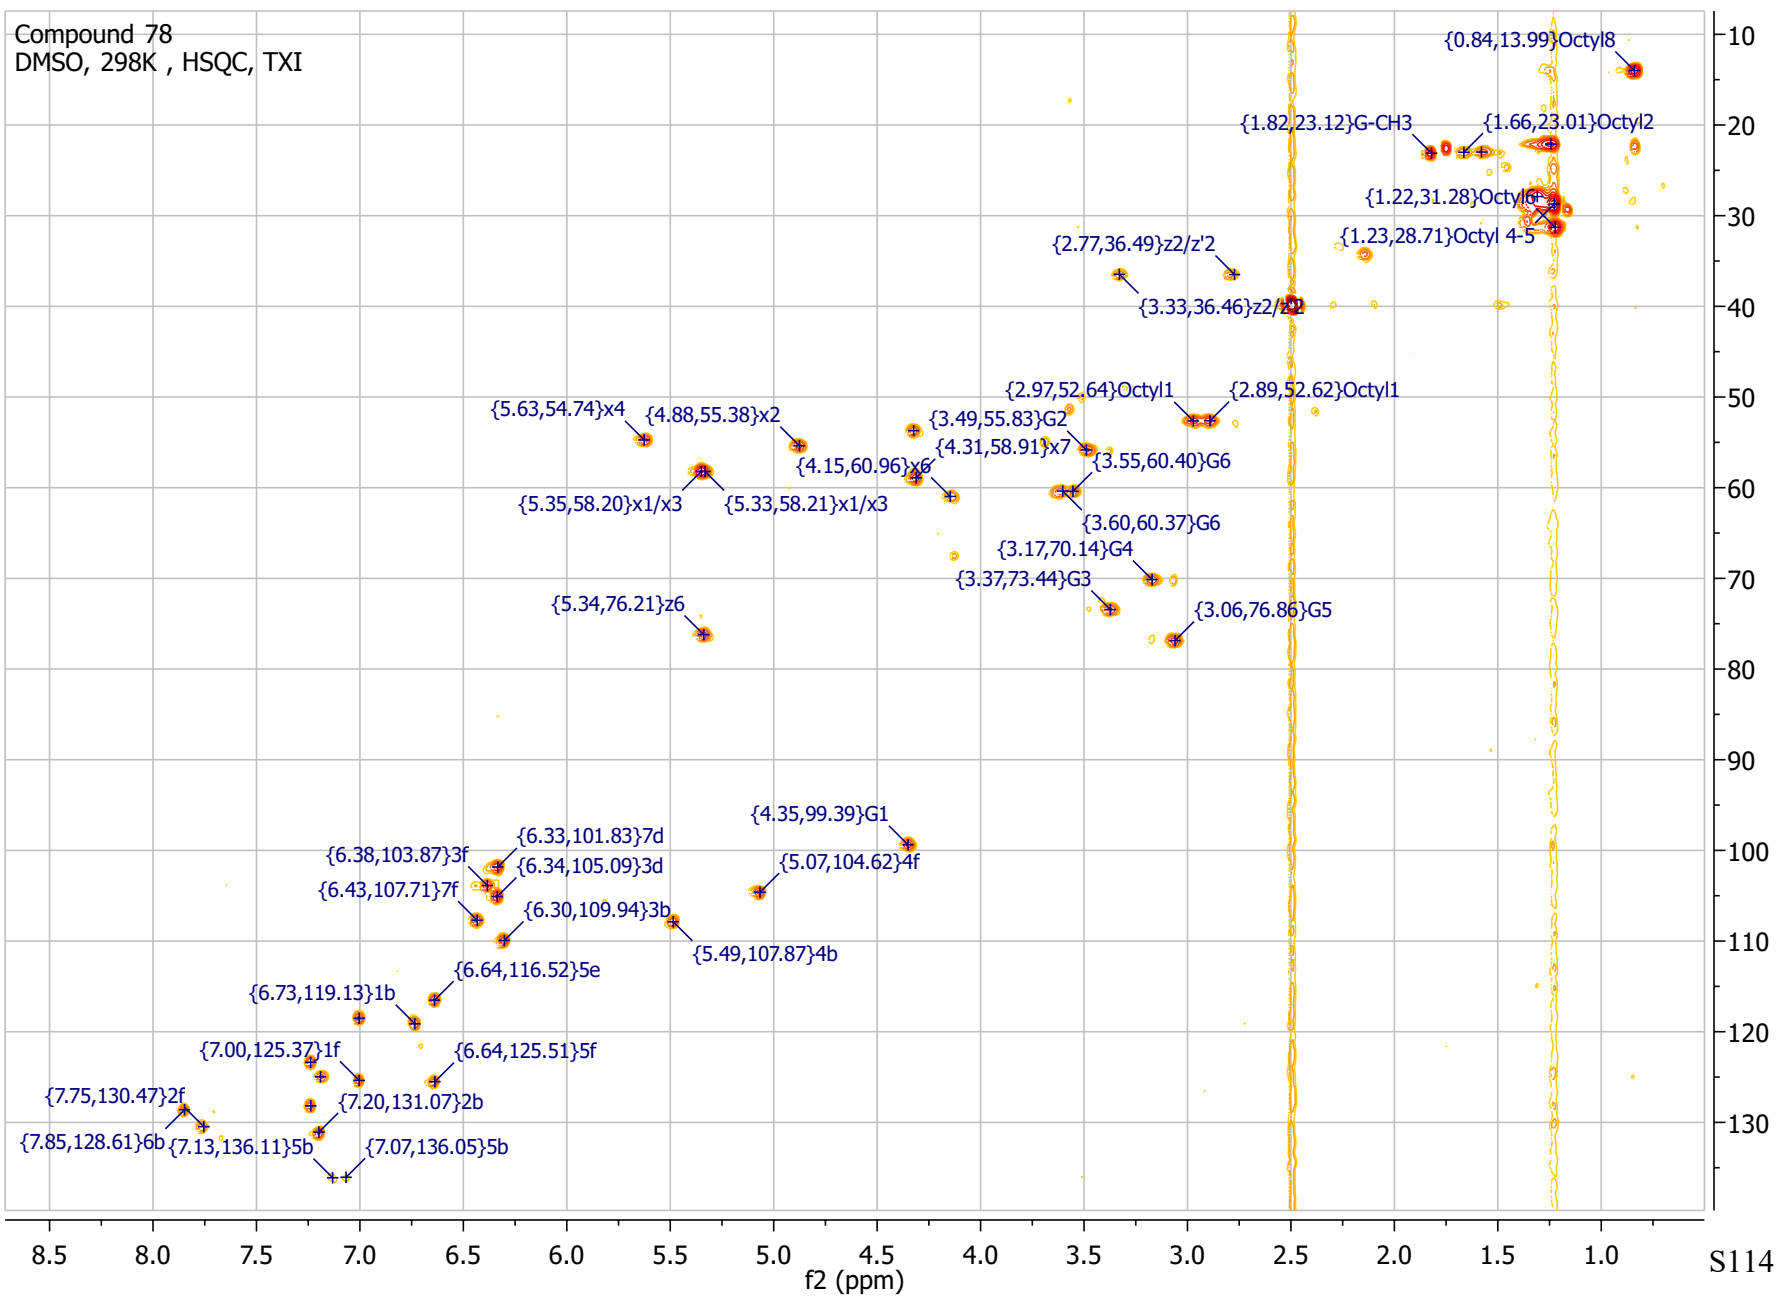

f1 (ppm)

f2 (ppm)

S114

Compound 79  
DMSO, 298K HSQC, TXI

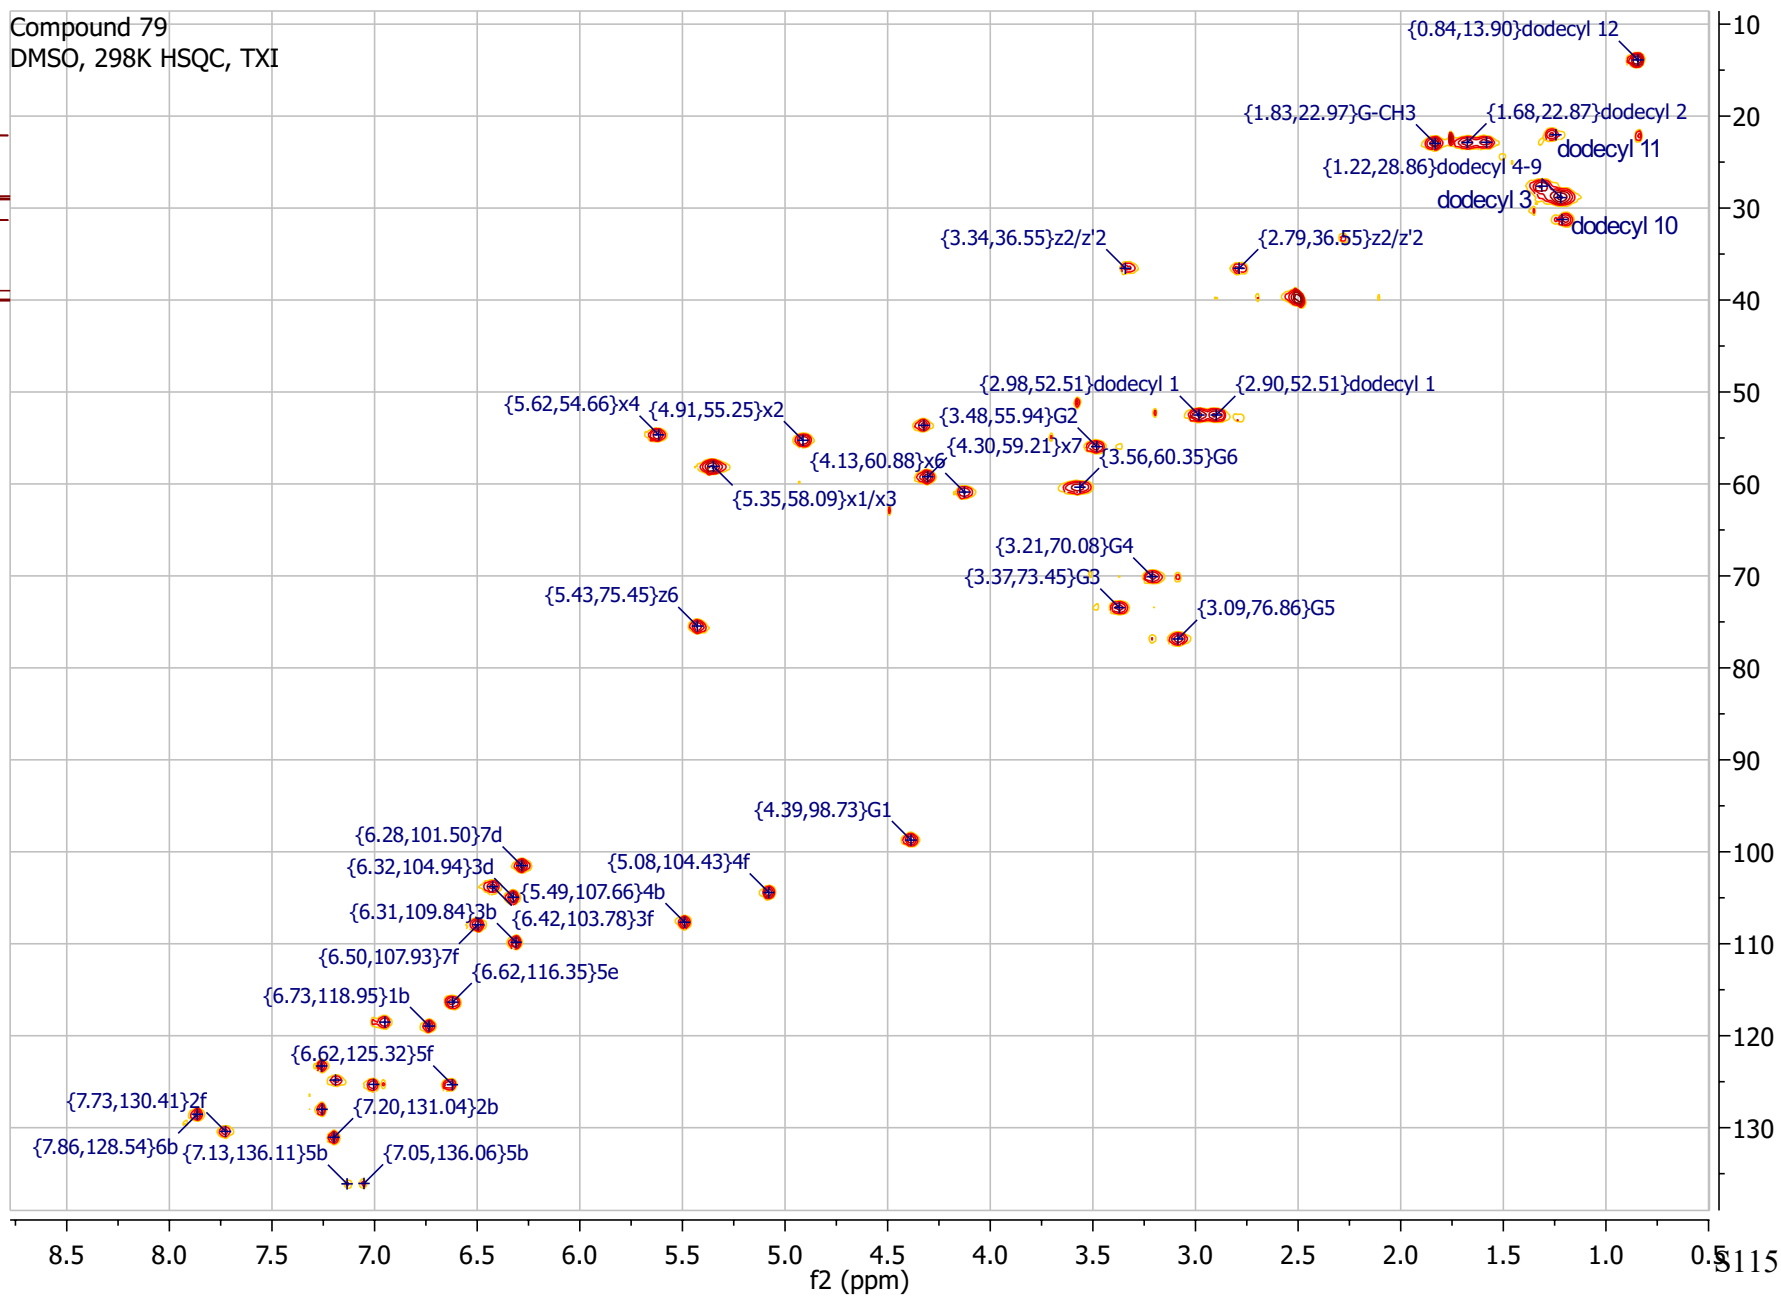

Supplement: mmc1.pdf [file mmc1.pdf]
